# Supplementary material
Source: publisher figshare collection journal article supplement (https://gsapubs.figshare.com/ndownloader/files/25794668)
Supplement: Supplementary file 1 [file 25794668]

Selected_age	Age_2s_error	Mg	P	Ti	Mn	Fe	Rb	Sr	Y	Zr	Nb	La	Ce	Pr	Nd	Sm	Eu	Gd	Tb	Dy	Ho	Er	Tm	Yb	Lu	Hf	Ta	Th	U	Sample	Analysis	Region	Sub_region	Reference
0.002683	0.004	NA	NA	19.7	NA	NA	NA	NA	7090	NA	36.1	0.09	28.74	NA	15.09	38.9	13.08	288.1	NA	1016.2	NA	1358.6	NA	1901.9	298.1	7889	NA	298.4	319	Hekla 1158 AD	IHB1-22.1I	Iceland	Iceland	Carley et al 2011
0.003372	0.003	NA	NA	19.4	NA	NA	NA	NA	1631	NA	12.9	0.03	26.1	NA	3.11	6.2	1.6	45.8	NA	216.2	NA	334.8	NA	501.4	81.1	8858	NA	109.4	152.6	Torfajokull 1477 AD	ITN1-14.2I	Iceland	Iceland	Carley et al 2011
0.003563	0.005	NA	NA	12.6	NA	NA	NA	NA	1140	NA	5.6	0.11	6.46	NA	1.02	3.2	1.04	31.7	NA	132	NA	205.7	NA	341.8	53.9	8985	NA	28.2	51.1	Oraefajokull 1362 AD	IOHN1-8.1I	Iceland	Iceland	Carley et al 2011
0.005017	0.005	NA	NA	16.9	NA	NA	NA	NA	18199	NA	203.8	0.24	326.59	NA	26.25	70	9.8	608.9	NA	2330.5	NA	3190.5	NA	3966.4	549.8	7744	NA	1040	887.3	Oraefajokull 1362 AD	IOHN1-15.3C	Iceland	Iceland	Carley et al 2011
0.006943	0.008	NA	NA	11.6	NA	NA	NA	NA	7104	NA	40.4	0.08	37.03	NA	9.32	30.2	9.87	252.6	NA	946.2	NA	1283.3	NA	1697.2	254.6	7294	NA	203.8	241.3	Oraefajokull 1362 AD	IOHN1-3.1T	Iceland	Iceland	Carley et al 2011
0.007082	0.005	NA	NA	8.4	NA	NA	NA	NA	1669	NA	10.4	0.04	16.64	NA	2.58	6.9	3.11	68.2	NA	319.2	NA	494.6	NA	778.9	128.7	9712	NA	103.7	143	Hekla 1158 AD	IHB1-13.1I	Iceland	Iceland	Carley et al 2011
0.008104	0.005	NA	NA	20.6	NA	NA	NA	NA	3272	NA	32.6	0.06	26.37	NA	2.28	4.3	1.15	36.3	13.1	146.1	55.9	234.6	46.2	362.3	61.6	8873	NA	226.4	245.6	Torfajokull 3100 BP	3A03TE-6.1E	Iceland	Iceland	Carley et al 2011
0.008354	0.005	NA	NA	17.8	NA	NA	NA	NA	1237	NA	21.5	0.03	20.71	NA	1.51	2.7	0.71	27.4	9.8	106.4	40.4	173.6	34	266.2	46.1	8334	NA	99.7	142.1	Torfajokull 3100 BP	3A03TE-4.1E	Iceland	Iceland	Carley et al 2011
0.009281	0.003	NA	NA	19.2	NA	NA	NA	NA	801	NA	9.5	0.06	20.84	NA	0.88	2.4	0.69	20.8	NA	87.7	NA	144.7	NA	244	39.7	9168	NA	56.1	84.9	Torfajokull 1477 AD	ITN1-1.1I	Iceland	Iceland	Carley et al 2011
0.010476	0.008	NA	NA	29.1	NA	NA	NA	NA	18996	NA	166.4	0.32	351.38	NA	37.51	93	12.34	689.4	NA	2577.6	NA	3344.6	NA	4104.4	570.2	7336	NA	893.3	761.4	Oraefajokull 1362 AD	IOHN1-4.1C	Iceland	Iceland	Carley et al 2011
0.011431	0.004	NA	NA	12.3	NA	NA	NA	NA	3981	NA	170.9	0.11	142.42	NA	5.01	12.3	1.18	119.6	43	460.8	169.4	708.4	138.6	1068.7	167.6	9481	NA	801.2	908.5	Torfajokull 871 AD	ITHN1-3.2DZ	Iceland	Iceland	Carley et al 2011
0.011484	0.004	NA	NA	12.2	NA	NA	NA	NA	2588	NA	13.9	0.04	23.31	NA	5.13	10.2	1.59	74.7	NA	326.1	NA	484.5	NA	728.5	109.1	9310	NA	160	221.4	Torfajokull 1477 AD	ITN1-10.1I	Iceland	Iceland	Carley et al 2011
0.012111	0.005	NA	NA	21	NA	NA	NA	NA	2387	NA	31.3	0.13	39.56	NA	4.48	8.8	2.17	75	25.7	271.2	98.5	414.3	78.4	606.2	100	8135	NA	231.4	220	Torfajokull 3100 BP	3A03TE-7.1E	Iceland	Iceland	Carley et al 2011
0.012284	0.006	NA	NA	10.2	NA	NA	NA	NA	8213	NA	184.2	0.13	166.91	NA	12.37	29.3	0.84	238	NA	1169.6	NA	1812.8	NA	2717.7	391.7	8942	NA	1682.9	1943.4	Torfajokull 1477 AD	ITN1-5.2C	Iceland	Iceland	Carley et al 2011
0.013058	0.01	NA	NA	9.2	NA	NA	NA	NA	6952	NA	44.8	0.12	60.16	NA	9.92	28.8	6.17	251.6	NA	877	NA	1211.8	NA	1597.2	236.7	7868	NA	274.6	322.1	Oraefajokull 1362 AD	IOHN1-16.1I	Iceland	Iceland	Carley et al 2011
0.015182	0.004	NA	NA	14.7	NA	NA	NA	NA	1419	NA	30	0.04	34.48	NA	1.88	4.6	0.67	39	13.8	150.6	58.3	239.5	48.2	369.9	62.3	9233	NA	192	247	Torfajokull 871 AD	ITHN1-9.4I	Iceland	Iceland	Carley et al 2011
0.01555	0.005	NA	NA	19.5	NA	NA	NA	NA	940	NA	22.4	0.03	21.88	NA	1.53	3.3	0.87	31.8	11.3	122.4	47.9	212.3	43.1	334.7	59	8627	NA	97.9	131.6	Torfajokull 3100 BP	3A03TE-1.2T	Iceland	Iceland	Carley et al 2011
0.01555	0.005	NA	NA	20.8	NA	NA	NA	NA	1340	NA	30.6	0.14	23.58	NA	5.24	10.9	2.79	98.7	32.4	331	119.8	480.5	92.9	688.7	113.7	8993	NA	128.8	158.8	Torfajokull 3100 BP	3A03TE-1.1I	Iceland	Iceland	Carley et al 2011
0.016089	0.006	NA	NA	10.2	NA	NA	NA	NA	2063	NA	55.7	0.06	91.66	NA	3.22	7.6	1.81	72.1	24.9	255.8	91	365.1	66.8	471.8	73.6	7080	NA	269.1	268.5	Torfajokull 7500 BP	5A03TE-6.1I	Iceland	Iceland	Carley et al 2011
0.016219	0.007	NA	NA	22.5	NA	NA	NA	NA	2493	NA	47.7	0.15	30.83	NA	6.68	14	3.33	110.8	36	374.6	136.5	529.5	101.7	774.4	121.8	8195	NA	192.2	253.5	Torfajokull 3100 BP	3A03TE-3.1I	Iceland	Iceland	Carley et al 2011
0.01692	0.004	NA	NA	14.8	NA	NA	NA	NA	3012	NA	32	0.12	37.81	NA	5.32	10.9	2.12	101.2	32	350.2	129.6	524.8	100.6	765.8	122.8	9020	NA	234.9	277.5	Torfajokull 871 AD	ITHN1-5.1I	Iceland	Iceland	Carley et al 2011
0.017667	0.008	NA	NA	15.7	NA	NA	NA	NA	4927	NA	146.6	0.11	342.74	NA	8.71	22.4	5.77	209	67	658.2	218.3	837.5	145.7	1014.4	149.2	6815	NA	1413.7	812.3	Torfajokull 7500 BP	5A03TE-1.1	Iceland	Iceland	Carley et al 2011
0.017715	0.007	NA	NA	18.8	NA	NA	NA	NA	2125	NA	41.4	0.03	53.75	NA	3.4	6.7	1.26	62.4	21.9	237.9	90.1	372.1	69.9	538.8	87.1	8615	NA	730.9	503.2	Torfajokull 871 AD	ITHN1-6.1I	Iceland	Iceland	Carley et al 2011
0.017786	0.004	NA	NA	18.9	NA	NA	NA	NA	3573	NA	12.6	0.05	12.29	NA	6.97	17.7	6.36	130.7	NA	492.7	NA	711.7	NA	1066.8	171.3	8129	NA	117.9	175.9	Hekla 1158 AD	IHB1-1.1I	Iceland	Iceland	Carley et al 2011
0.018181	0.005	NA	NA	18.5	NA	NA	NA	NA	5123	NA	26.3	0.15	20.7	NA	10.28	23.7	7.46	165.2	NA	590.6	NA	815.4	NA	1184.3	190.5	8088	NA	136.1	194.2	Hekla 1158 AD	IHB1-16.1I	Iceland	Iceland	Carley et al 2011
0.018426	0.005	NA	NA	11.8	NA	NA	NA	NA	5106	NA	20.6	0.08	22.28	NA	8.21	22.5	8.67	188.2	NA	655.9	NA	890.4	NA	1204.1	189.2	6718	NA	126.6	173.8	Oraefajokull 1362 AD	IOHN1-9.1E	Iceland	Iceland	Carley et al 2011
0.020332	0.01	NA	NA	13.7	NA	NA	NA	NA	8457	NA	391.3	0.26	380.37	NA	13.88	31.5	2.14	281.2	102.2	1066.6	364.5	1498.5	277.5	2082.3	296.1	9379	NA	3829	2277.8	Torfajokull 871 AD	ITHN1-4.1C	Iceland	Iceland	Carley et al 2011
0.020472	0.005	NA	NA	14.5	NA	NA	NA	NA	4990	NA	53	0.36	66.7	NA	9.33	19.8	1.72	168.2	56.6	584.8	212.1	854.2	162	1208.3	195	9194	NA	406.5	474.6	Torfajokull 871 AD	ITHN1-9.1C	Iceland	Iceland	Carley et al 2011
0.021862	0.005	NA	NA	12.7	NA	NA	NA	NA	3136	NA	23.6	0.14	29.6	NA	6.45	11.9	2.18	104.1	34.7	368.3	136.4	552.2	106.3	787	128.3	9151	NA	218.8	263	Torfajokull 871 AD	ITHN1-1.1E	Iceland	Iceland	Carley et al 2011
0.022264	0.006	NA	NA	12.5	NA	NA	NA	NA	2085	NA	29.7	0.04	30.09	NA	2.47	5.9	1.1	57.3	NA	219.4	NA	367.6	NA	599	98.2	9318	NA	143.6	233.8	Torfajokull 1477 AD	ITN1-8.2I	Iceland	Iceland	Carley et al 2011
0.022773	0.006	NA	NA	6.5	NA	NA	NA	NA	4479	NA	43.9	0.12	68.4	NA	7.96	18.7	4.15	161.1	54.5	548.5	194.1	757.5	139.3	979.9	151.7	7606	NA	219.5	284.6	Torfajokull 7500 BP	5A03TE-3.1I	Iceland	Iceland	Carley et al 2011
0.024075	0.008	NA	NA	14.6	NA	NA	NA	NA	6523	NA	30.1	0.15	40.72	NA	15.2	37.9	13.11	272.4	NA	918.9	NA	1229.1	NA	1734.9	282.3	8207	NA	308.5	313	Hekla 1158 AD	IHB1-12.2C	Iceland	Iceland	Carley et al 2011
0.026263	0.007	NA	NA	20.8	NA	NA	NA	NA	2413	NA	20	0.14	29.21	NA	4.78	8.9	2.02	77.9	26.4	288.4	102.9	428.5	81.8	635.3	101.7	9339	NA	159	194.4	Torfajokull 871 AD	ITHN1-8.1E	Iceland	Iceland	Carley et al 2011
0.026521	0.005	NA	NA	11.2	NA	NA	NA	NA	2012	NA	17.5	0.06	23.33	NA	4.2	8.1	1.49	68	21.5	231.5	83.7	334.4	64.6	484.9	78.1	9220	NA	113.8	96.5	Torfajokull 871 AD	ITHN1-3.1I	Iceland	Iceland	Carley et al 2011
0.026727	0.006	NA	NA	6.3	NA	NA	NA	NA	2727	NA	36.2	0.08	35.27	NA	5.54	10.6	2.78	103.7	32.7	342.6	122.5	485.5	90.8	640	97.2	7550	NA	104.9	158.3	Torfajokull 7500 BP	5A03TE-7.2I	Iceland	Iceland	Carley et al 2011
0.026727	0.006	NA	NA	11.1	NA	NA	NA	NA	1462	NA	36.6	0.03	43.85	NA	1.8	4.6	0.92	40.9	14.7	171	61.1	259	50.2	378.6	59.7	9533	NA	170.1	222.4	Torfajokull 7500 BP	5A03TE-7.1E	Iceland	Iceland	Carley et al 2011
0.026727	0.006	NA	NA	13.5	NA	NA	NA	NA	2838	NA	65.3	0.06	73.51	NA	3.95	9.7	2.07	88.9	30.4	331	121.3	503.1	95.6	739	119.9	8313	NA	261.4	290.5	Torfajokull 7500 BP	5A03TE-7.1C	Iceland	Iceland	Carley et al 2011
0.026926	0.005	NA	NA	13.1	NA	NA	NA	NA	2303	NA	22.6	0.37	27.82	NA	5.19	8.9	1.59	72.8	24.5	260.5	96.6	398.1	75.5	573.9	92.7	9276	NA	149.9	202.3	Torfajokull 871 AD	ITHN1-7.1I	Iceland	Iceland	Carley et al 2011
0.028198	0.007	NA	NA	20.6	NA	NA	NA	NA	6651	NA	62	9.13	116.95	NA	19.14	33.5	4.21	256.6	80.6	828	290.4	1143.1	217.1	1576.6	250	8763	NA	612.6	598.8	Torfajokull 871 AD	ITHN1-2.1C	Iceland	Iceland	Carley et al 2011
0.031008	0.014	NA	NA	10.6	NA	NA	NA	NA	2471	NA	62	0.05	117.85	NA	4.45	8.7	2.45	83.8	28.7	299	107.4	416.6	75.6	533.3	84.7	7137	NA	343.8	303.8	Torfajokull 7500 BP	5A03TE-4.1C	Iceland	Iceland	Carley et al 2011
0.031008	0.014	NA	NA	12.1	NA	NA	NA	NA	9983	NA	210.1	0.31	405.52	NA	20.31	47.6	9.1	386.1	127.2	1285.4	450.8	1698.3	300.3	2093.7	313.2	6775	NA	1095.2	927.6	Torfajokull 7500 BP	5A03TE-4.1C	Iceland	Iceland	Carley et al 2011
0.0327	0.0032	NA	NA	11	NA	NA	NA	NA	1616	NA	NA	0.03	2	0.09	1.6	4.3	0.89	26	11	134	55	246	52	489	96	NA	NA	4.28	36	T735G16	1_1	Juan de Fuca Ridge	Juan de Fuca Ridge	Schmitt et al 2011
0.0327	0.0032	NA	NA	16	NA	NA	NA	NA	3654	NA	NA	0.04	5.2	0.16	3	8.1	1.7	58	24	304	123	529	111	919	184	NA	NA	6.28	60	T735G12	7_1	Juan de Fuca Ridge	Juan de Fuca Ridge	Schmitt et al 2011
0.0327	0.0032	NA	NA	15	NA	NA	NA	NA	4093	NA	NA	0.08	15	0.2	3	9.4	2.2	73	30	366	146	624	128	1130	210	NA	NA	7.67	64	T735G16	4_1	Juan de Fuca Ridge	Juan de Fuca Ridge	Schmitt et al 2011
0.0327	0.0032	NA	NA	25	NA	NA	NA	NA	2251	NA	NA	0.54	11	0.3	2.4	4.4	0.96	34	14	184	77	341	73	643	122	NA	NA	13.53	84	T735G12	6_1	Juan de Fuca Ridge	Juan de Fuca Ridge	Schmitt et al 2011
0.0327	0.0032	NA	NA	13	NA	NA	NA	NA	3686	NA	NA	0.04	9.6	0.18	3.4	8.5	1.9	63	26	323	131	564	117	1010	194	NA	NA	13.75	88	T735G12	2_1	Juan de Fuca Ridge	Juan de Fuca Ridge	Schmitt et al 2011
0.0327	0.0032	NA	NA	3080	NA	NA	NA	NA	533	NA	NA	12	32	4.6	23	7.5	1.7	15	4.4	46	17	73	15	135	25	NA	NA	16.03	75	T735G13	1_1	Juan de Fuca Ridge	Juan de Fuca Ridge	Schmitt et al 2011
0.0327	0.0032	NA	NA	15	NA	NA	NA	NA	8706	NA	NA	0.05	6.8	0.42	9.4	28	0.6	174	69	794	309	1288	260	2197	426	NA	NA	21.45	118	T735G16	7_1	Juan de Fuca Ridge	Juan de Fuca Ridge	Schmitt et al 2011
0.0327	0.0032	NA	NA	11	NA	NA	NA	NA	5349	NA	NA	0.03	8.7	0.23	4.6	12	2.9	95	39	468	189	808	166	1389	271	NA	NA	24.41	114	T735G16	5_1	Juan de Fuca Ridge	Juan de Fuca Ridge	Schmitt et al 2011
0.0327	0.0032	NA	NA	19	NA	NA	NA	NA	9908	NA	NA	0.82	23	0.9	12	29	5.4	194	76	902	355	1474	295	2437	460	NA	NA	36.86	209	T735G16	6_1	Juan de Fuca Ridge	Juan de Fuca Ridge	Schmitt et al 2011
0.0327	0.0032	NA	NA	77	NA	NA	NA	NA	8359	NA	NA	0.35	34	0.71	11	24	3.7	154	63	739	290	1209	243	2033	366	NA	NA	41.04	197	T735G13	2_1	Juan de Fuca Ridge	Juan de Fuca Ridge	Schmitt et al 2011
0.0327	0.0032	NA	NA	28	NA	NA	NA	NA	6076	NA	NA	0.13	21	0.3	5.1	13	2.9	105	43	532	214	903	185	1538	293	NA	NA	50.39	196	T735G16	2_1	Juan de Fuca Ridge	Juan de Fuca Ridge	Schmitt et al 2011
0.0327	0.0032	NA	NA	46	NA	NA	NA	NA	3995	NA	NA	6.8	34	4	24	15	2.4	75	29	346	141	597	125	1066	205	NA	NA	101.37	445	T735G12	3_1	Juan de Fuca Ridge	Juan de Fuca Ridge	Schmitt et al 2011
0.033596	0.005	NA	NA	5.9	NA	NA	NA	NA	5397	NA	64	0.11	92.16	NA	10.97	24.9	6.94	206.3	69.6	720.3	246.9	967.1	173.7	1210.9	184.7	7753	NA	231.1	314.4	Torfajokull 7500 BP	5A03TE-2.1I	Iceland	Iceland	Carley et al 2011
0.033596	0.005	NA	NA	10.7	NA	NA	NA	NA	1404	NA	115.1	0.11	55.24	NA	2.22	5.2	1.24	41.6	16.9	183.7	63.2	281.8	55.8	437.5	65.3	11335	NA	339	321.2	Torfajokull 7500 BP	5A03TE-2.2E	Iceland	Iceland	Carley et al 2011
0.034253	0.011	NA	NA	12.7	NA	NA	NA	NA	978	NA	8.7	0.02	7.31	NA	0.91	2.6	0.88	24	NA	113	NA	185	NA	294.9	46.6	7908	NA	33.9	71.2	Oraefajokull 1362 AD	IOHN1-7.1T	Iceland	Iceland	Carley et al 2011
0.037119	0.009	NA	NA	23.4	NA	NA	NA	NA	2030	NA	35.1	0.02	24.89	NA	1.76	4.1	0.96	34.1	11.3	127.3	48.9	210.4	41.8	320.3	54.5	8250	NA	155.6	199	Torfajokull 3100 BP	3A03TE-2.1I	Iceland	Iceland	Carley et al 2011
0.038649	0.009	NA	NA	25.7	NA	NA	NA	NA	1546	NA	29	0.17	34.43	NA	6.18	13.3	3.31	114.2	37.9	386.4	138.1	560	109	806.6	130.9	8709	NA	358.7	283.7	Torfajokull 3100 BP	3A03TE-5.1E	Iceland	Iceland	Carley et al 2011
0.045639	0.012	NA	NA	21.3	NA	NA	NA	NA	1741	NA	22.6	0.04	39.12	NA	2.56	5.6	1.3	50.2	NA	211.7	NA	331.2	NA	519.6	82.5	9064	NA	308.6	277.9	Torfajokull 1477 AD	ITN1-3.1T	Iceland	Iceland	Carley et al 2011
0.2	0.22	NA	NA	3.47	NA	NA	NA	0.0916	179	NA	4.22	NA	0.54	0.44	0.69	1.26	0.81	5.66	1.79	20.4	6.2	25.6	5.16	44	6.74	5955	2.35	13.2	21.8	NA	GNV4.4.1	Asia	SE Asia	Sutherland et al 2016
0.511923918	0.515657251	NA	116.7504246	9.010545188	NA	NA	NA	NA	1461.614339	NA	4.337839889	NA	7.036865974	0.19003619	4.263087417	8.896397781	1.463602226	46.9165525	14.99000249	169.0973179	56.64041193	220.6005355	46.07640594	437.7262471	57.58803305	10611.23047	1.686387379	72.09867495	80.11649262	NA	13MFT-5 SPOT 632	North America	Western North America	Rivera et al 2016
0.574731202	0.590431323	NA	158.0156786	8.214604575	NA	NA	NA	NA	1725.849166	NA	3.879040908	1.846706932	9.379641275	0.568797108	8.048761553	11.80102757	1.877660793	58.48821058	19.02341864	201.3452753	68.82407175	253.6369512	53.55203	497.0163976	63.03696238	8854.947732	1.583537002	78.32868009	75.9535332	NA	13MFT-5 SPOT 696	North America	Western North America	Rivera et al 2016
0.586425217	0.676453536	NA	212.0861832	5.562941085	NA	NA	NA	NA	965.3225397	NA	14.12671527	0.77404036	16.99499812	0.312418088	3.188104923	5.294216399	0.243155885	24.96043094	8.900280295	112.0075877	37.46046188	148.1786061	42.06025627	462.7543348	43.39362305	10088.964	5.822841807	140.8747872	238.4431413	NA	13MFT-2 SPOT 301	North America	Western North America	Rivera et al 2016
0.6	0.11	NA	NA	7.11	NA	NA	NA	0.096	175	NA	2.59	NA	0.54	0.028	0.57	1.2	0.81	5.67	1.76	19.9	6.08	25	5.06	43	6.6	5996	1.83	13.7	22.3	NA	GNV4.3.1	Asia	SE Asia	Sutherland et al 2016
0.635973935	0.660011634	NA	166.2720596	5.843114132	NA	NA	NA	NA	685.9255203	NA	10.56837617	NA	12.659626	0.045191425	2.107715572	2.982282912	0.230799995	18.42192293	6.361794038	75.57831718	26.06570649	105.1121592	26.99196885	311.7465897	29.3261163	8489.505061	4.754816834	81.65439284	154.7110229	NA	13MFT-3 SPOT 479	North America	Western North America	Rivera et al 2016
0.682791946	0.753156624	NA	130.9087284	10.12043779	NA	NA	NA	NA	1575.3386	NA	3.991409055	NA	6.331584785	0.156252479	4.318561419	11.37073981	1.964324798	51.51413708	17.475544	186.5227544	60.07237045	236.5641366	52.95630482	494.8666873	57.48396718	9766.171681	2.177073714	68.58230138	77.4040446	NA	13MFT-3 SPOT 434	North America	Western North America	Rivera et al 2016
0.693423575	0.23232584	NA	266.844023	9.598233425	NA	NA	NA	NA	3421.888484	NA	10.38733979	3.035267072	20.46502886	1.638890396	19.91268602	29.27284306	3.66248854	125.648298	37.97399429	439.8421405	140.4311536	515.2160886	113.4648068	1152.806919	111.4051145	7635.372838	3.923453765	267.9348436	260.8675618	NA	13MFT-3 SPOT 532	North America	Western North America	Rivera et al 2016
0.70760972	0.236235307	NA	217.9392895	8.454789338	NA	NA	NA	NA	1318.316682	NA	7.045899017	0.321597301	10.87561288	0.250930177	4.723299143	9.776601211	0.995732493	42.40784766	14.69453155	160.7096738	54.3822	207.3717468	47.9666262	505.8908715	50.6654655	7482.673884	3.033316468	122.9339343	163.1481287	NA	13MFT-7 SPOT 592	North America	Western North America	Rivera et al 2016
0.721079004	0.465917741	NA	185.2204361	11.19125844	NA	NA	NA	NA	2056.646231	NA	5.176260632	0.143360005	8.234329062	0.329198924	9.451410161	14.53224069	2.869220887	75.48313566	22.53072732	256.5363011	83.0549705	306.8950204	69.73210039	660.3864763	74.30766942	8252.51065	2.873635444	137.6314389	136.9438421	NA	13MFT-3 SPOT 518	North America	Western North America	Rivera et al 2016
0.813195998	0.281413996	NA	165.7096303	4.848438344	NA	NA	NA	NA	804.1837431	NA	10.80437561	NA	12.94401708	0.057480149	1.076623307	2.824427222	0.346097596	19.98826845	7.395900148	92.32529936	31.57056969	130.1260969	31.64361267	334.2483925	35.1093807	8240.193204	4.395834011	104.7029468	166.01711	NA	13MFT-5 SPOT 658	North America	Western North America	Rivera et al 2016
0.838637539	0.201437599	NA	201.2055398	6.036204024	NA	NA	NA	NA	991.7738243	NA	10.85015409	0.345722115	14.1064716	0.123163389	2.264083471	4.624285802	0.433448316	25.65070564	9.394443981	112.546725	37.96620429	154.1967438	36.88829381	385.2343597	41.4121082	8364.487537	4.430609569	127.8598802	177.0297794	NA	13MFT-1 SPOT 395	North America	Western North America	Rivera et al 2016
0.855144272	0.348716082	NA	255.0972761	11.52425987	NA	NA	NA	NA	2424.359672	NA	8.589812274	1.831295957	12.93292159	0.833263743	10.13742307	17.47343417	3.012301027	82.08442943	25.66380688	285.7263481	91.17766054	353.1218877	74.79381226	695.7886374	87.20216603	8692.053965	3.27532071	193.2834264	149.5256333	NA	13MFT-5 SPOT 620	North America	Western North America	Rivera et al 2016
0.860503567	0.426777983	NA	222.593065	10.68339118	NA	NA	NA	NA	973.2085384	NA	7.589592531	2.193225304	12.59406634	0.811308388	5.907406218	6.249874103	1.132420275	30.15238629	10.53946689	114.3873436	38.12058386	151.1653272	36.02583388	398.4851403	34.60885158	6544.054911	2.342353584	107.2640378	142.1959158	NA	13MFT-3 SPOT 483	North America	Western North America	Rivera et al 2016
0.861091792	0.570875368	NA	147.2334798	11.1311863	NA	NA	NA	NA	1166.057525	NA	2.872603309	0.91332498	6.937446412	0.483459412	5.040404931	7.714974523	1.542713598	37.16708584	12.00071463	136.2858163	43.40634636	163.3869492	38.62298053	391.5238165	44.53768492	8067.278176	1.280889693	49.62579862	69.97794446	NA	13MFT-1 SPOT 360	North America	Western North America	Rivera et al 2016
0.905012496	0.320167368	NA	272.1880347	9.158944732	NA	NA	NA	NA	3020.962547	NA	6.472613358	2.795072761	16.09833929	1.33607379	13.38107839	21.21882307	2.882347956	107.6517047	32.65320565	358.2328944	119.9959008	456.5537175	94.57366889	864.2468034	105.0334361	9142.522019	3.000291081	206.6033279	172.0889365	NA	13MFT-5 SPOT 692	North America	Western North America	Rivera et al 2016
0.918994757	0.371402466	NA	221.7355718	6.630788469	NA	NA	NA	NA	923.8896542	NA	10.38664776	0.185580248	19.2727562	0.091447398	1.766748184	3.443340054	0.163140747	21.7832504	7.315715855	96.92106818	34.84994717	144.0332722	33.86939387	387.0830821	39.599169	9558.852207	4.226865473	126.9072634	203.4695497	NA	13MFT-1 SPOT 369	North America	Western North America	Rivera et al 2016
0.951198612	0.256054476	NA	205.9740567	7.672536484	NA	NA	NA	NA	2726.638292	NA	10.74310937	0.062150618	13.28108189	0.565754701	10.25333461	24.3356873	3.707499657	112.9423115	33.35344493	365.6989296	114.816052	415.3686661	96.56094235	964.2288266	85.99337817	6439.930052	3.495582953	208.210755	235.8960667	NA	13MFT-3 SPOT 484	North America	Western North America	Rivera et al 2016
0.95262814	0.38516737	NA	219.5990671	5.178431179	NA	NA	NA	NA	908.8057947	NA	12.29657663	2.784585753	18.13711243	0.817574609	4.40438636	4.458188465	0.338469851	24.11062669	8.347273802	100.6778657	35.89380137	140.8355423	36.07885931	383.8501031	38.67365186	8223.968021	4.786128874	124.6336751	207.6226618	NA	13MFT-3 SPOT 540	North America	Western North America	Rivera et al 2016
0.95452171	0.504345847	NA	212.260722	5.722400601	NA	NA	NA	NA	977.3893843	NA	8.300970651	0.523352125	12.41571054	0.346707167	2.229371567	3.352863619	0.401217988	24.96611926	8.866249588	103.3900702	38.28068093	152.0441509	33.78916389	340.7146365	44.09356979	10211.91732	4.365438555	88.05193713	111.5027789	NA	13MFT-6 SPOT 270	North America	Western North America	Rivera et al 2016
0.968146646	0.291551278	NA	189.6836397	8.779182814	NA	NA	NA	NA	2444.602669	NA	7.6938083	0.116054065	11.19487766	0.652042238	9.455922126	18.51294688	3.260076089	89.60557949	27.7012065	305.98471	99.58551066	366.778791	81.42681435	806.9362065	79.52740035	7470.963032	3.396887914	158.0956997	179.622956	NA	13MFT-1 SPOT 413	North America	Western North America	Rivera et al 2016
0.99245223	0.253771011	NA	187.9984133	4.512733244	NA	NA	NA	NA	934.1623608	NA	12.75431988	0.049008051	15.72393026	0.072762267	1.281896005	4.102665455	0.214115918	22.48533796	8.333002382	96.46924712	35.49521817	151.3173989	37.09885911	396.3948197	41.32110932	9308.515398	5.645791652	128.2028141	237.1175391	NA	13MFT-7 SPOT 545	North America	Western North America	Rivera et al 2016
1.002247251	0.483176505	NA	178.9297985	4.705575452	NA	NA	NA	NA	806.7189911	NA	9.637898231	0.254283535	11.43407494	0.130624955	1.755280733	3.218773962	0.303544952	19.07622317	7.465294825	92.49876268	30.99248943	131.3575252	32.23120054	347.1238686	37.40632418	9376.797104	4.766973241	78.90506698	134.1363841	NA	13MFT-2 SPOT 296	North America	Western North America	Rivera et al 2016
1.009883096	0.256549292	NA	281.8336544	4.630580519	NA	NA	NA	NA	990.4861515	NA	12.82910277	5.598524848	25.39836209	1.581042113	8.581668088	5.812673049	0.191454018	24.21363882	8.319904537	106.4074367	39.30934548	160.4873516	39.11025847	408.8840516	42.97731739	9237.218361	5.088173261	157.232583	256.7713284	NA	13MFT-1 SPOT 417	North America	Western North America	Rivera et al 2016
1.010667368	0.260122536	NA	236.7636744	4.732346845	NA	NA	NA	NA	1151.161864	NA	14.69112765	0.010138541	16.09127286	0.077750221	1.380092692	4.362960143	0.169437009	27.1621613	9.293696511	125.2944313	44.39516156	183.0759204	45.75003663	469.5385562	50.61244705	10720.19847	5.670418681	178.2524411	277.00855	NA	13MFT-2 SPOT 293	North America	Western North America	Rivera et al 2016
1.019195061	0.38736986	NA	184.0258174	7.068585903	NA	NA	NA	NA	718.8592464	NA	9.601802979	0.072048787	11.52056769	0.042128823	1.071750907	5.380983831	0.47334933	19.83898426	6.374557356	83.82770354	31.34699365	113.7682215	28.42347688	343.1535457	27.71526326	8000.184214	3.866397588	84.07513186	173.2270762	NA	13MFT-3 SPOT 470	North America	Western North America	Rivera et al 2016
1.022535441	0.323682316	NA	289.4032695	9.252913484	NA	NA	NA	NA	2438.322956	NA	5.361094199	5.225645998	16.38883415	1.974423499	17.56773276	24.78617152	4.930019012	91.25940539	28.3516265	308.7535466	97.82699507	356.3614096	78.78491318	779.9659168	78.07434466	6780.001051	2.248526055	121.5663142	133.6600991	NA	13MFT-6 SPOT 302	North America	Western North America	Rivera et al 2016
1.026750667	1.067640329	NA	176.7106612	11.18297882	NA	NA	NA	NA	2069.225494	NA	4.944575262	0.321864329	10.07228273	0.713795858	10.41613253	16.51911663	3.32218507	78.24882185	24.08608212	266.1970782	84.21717306	308.3453414	72.14032807	738.0138255	70.75827464	7729.392788	2.406236664	122.0685823	147.4102611	NA	13MFT-2 SPOT 349	North America	Western North America	Rivera et al 2016
1.02713644	0.406844381	NA	329.6504337	6.593353383	NA	NA	NA	NA	1044.826511	NA	10.29176352	9.454805223	31.49515405	1.996095341	16.27316265	8.367495235	0.757021263	29.79798403	9.93443069	123.9706068	42.0470815	163.5830333	39.82870271	400.910426	45.35896628	9454.359493	4.810476727	133.2674472	171.3852876	NA	13MFT-5 SPOT 651	North America	Western North America	Rivera et al 2016
1.027749936	0.259069686	NA	187.5581549	5.684823747	NA	NA	NA	NA	1071.069909	NA	13.08834503	2.552064472	17.43128094	0.717994552	4.56039725	5.516553502	0.324784975	23.49889781	9.420097185	111.8915003	41.14285218	169.4756482	42.08280611	395.86349	50.09008078	11584.9929	4.957416457	130.6068938	173.2190243	NA	13MFT-5 SPOT 695	North America	Western North America	Rivera et al 2016
1.038210679	0.500151947	NA	120.4995764	10.11963848	NA	NA	NA	NA	1013.506474	NA	3.202346796	NA	4.683049429	0.201407057	3.733384906	8.324920274	1.701038521	35.82458586	11.37255287	124.2073469	39.8805483	148.9585818	34.95258364	362.0324653	37.11586368	7501.822356	1.227352189	44.03545745	64.00250718	NA	13MFT-1 SPOT 389	North America	Western North America	Rivera et al 2016
1.05067736	0.762136702	NA	177.6670982	16.46254606	NA	NA	NA	NA	1696.948463	NA	2.153707273	0.266213679	4.492974301	0.607261109	9.769772466	16.1437694	3.865495899	70.49164426	21.60750872	230.1042839	69.0064968	252.0608893	57.57929117	610.1633659	55.42131587	6076.242312	1.180065689	62.7136798	83.48104586	NA	13MFT-2 SPOT 305	North America	Western North America	Rivera et al 2016
1.054369634	0.313172682	NA	237.1432624	12.16382092	NA	NA	NA	NA	3126.680613	NA	9.900999272	0.149622125	12.72976225	0.766561493	15.1990097	31.82091906	5.811261092	126.5464374	39.59501324	418.0799514	128.5151988	460.9369423	104.0906506	1081.917373	96.06821262	5932.822374	3.373521	215.4502347	234.2232697	NA	13MFT-3 SPOT 468	North America	Western North America	Rivera et al 2016
1.059420616	0.366069347	NA	250.2629472	8.419086636	NA	NA	NA	NA	2561.445209	NA	7.917337166	0.150974631	14.63636081	0.597824178	9.7556443	13.8637876	1.075680998	75.58208853	24.9439554	290.3128113	99.80169429	391.5127061	86.25845353	801.6974614	102.7082796	9982.30576	3.486562891	250.2098133	222.5342745	NA	13MFT-5 SPOT 625	North America	Western North America	Rivera et al 2016
1.06330418	0.320977569	NA	251.799233	13.27436855	NA	NA	NA	NA	3557.421163	NA	9.535975287	0.290280086	11.77477842	0.694099721	12.94106599	26.63269943	5.234861798	140.5212836	40.44892495	430.1377467	138.6069891	509.1712438	110.4132487	1017.959729	118.7550122	8460.109155	3.024209554	267.3474962	183.4156823	NA	13MFT-4 SPOT 447	North America	Western North America	Rivera et al 2016
1.063941493	0.323956279	NA	187.86282	6.115010456	NA	NA	NA	NA	847.2225059	NA	11.77142739	0.106110841	14.69506988	0.121186767	1.768716823	4.159252434	0.249629537	25.23475373	7.749340948	95.91778214	33.02932822	134.6036352	34.28691572	363.927727	35.53281659	8502.531111	4.368836167	110.5879434	189.7237618	NA	13MFT-7 SPOT 534	North America	Western North America	Rivera et al 2016
1.071009785	0.243341804	NA	216.0883467	5.35392853	NA	NA	NA	NA	2170.878529	NA	7.017511974	0.126554475	17.48368989	0.211243423	4.755698628	11.61308733	0.949526624	63.47081754	21.81257482	249.0272113	82.4301159	340.6236933	74.40519225	720.3699189	83.11386321	10847.36459	3.237011105	223.0957073	222.5819805	NA	13MFT-7 SPOT 502	North America	Western North America	Rivera et al 2016
1.071474367	0.307728705	NA	216.293268	5.45828197	NA	NA	NA	NA	973.5456061	NA	12.41326392	1.484046104	17.24531369	0.452896749	3.598239859	5.060992727	0.280388404	25.96761254	8.337748268	108.4506625	37.69326474	152.958348	37.55482264	396.1983484	41.09830877	9104.977633	5.235064488	126.7233459	195.71642	NA	13MFT-2 SPOT 398	North America	Western North America	Rivera et al 2016
1.073094036	0.453462758	NA	208.535151	10.26661822	NA	NA	NA	NA	883.1018533	NA	6.277756702	0.041036456	9.153351698	0.130477167	1.452225725	3.659373762	0.251711935	20.76915952	7.642689746	89.41549524	32.90209311	137.1917744	32.21313234	339.6600322	39.63275778	9261.604027	2.559884497	82.23148907	116.4249163	NA	13MFT-7 SPOT 503	North America	Western North America	Rivera et al 2016
1.08971973	0.641745903	NA	114.8601591	7.815807567	NA	NA	NA	NA	1385.512682	NA	4.685185699	0.245029149	8.794235197	0.119589334	2.811354317	7.308353947	1.40614744	44.88045482	13.56397186	156.849686	53.02479941	203.8424687	47.00213608	456.318542	54.89395936	11161.22336	2.356406886	84.63886562	93.54952059	NA	13MFT-4 SPOT 455	North America	Western North America	Rivera et al 2016
1.094157958	0.325874946	NA	242.5280312	7.495403658	NA	NA	NA	NA	1340.191135	NA	12.04818776	2.822991414	21.1812959	0.656130024	5.986811251	6.104806056	0.515142013	42.25579359	12.20393002	142.5200301	49.56229902	211.2655268	50.74067905	497.6014943	58.57772753	11157.84429	5.249135271	183.7016725	214.0098824	NA	13MFT-4 SPOT 473	North America	Western North America	Rivera et al 2016
1.102591903	0.271452589	NA	453.5840316	5.543499505	NA	NA	NA	NA	2770.087769	NA	17.59874564	6.502193813	48.10029253	2.109628032	13.21078409	12.94132422	0.558438011	63.19781979	22.59014338	279.1089631	102.7263595	439.0527387	99.57346358	976.3482561	123.4805356	13300.23854	7.521814495	544.3338324	507.3333967	NA	13MFT-6 SPOT 264	North America	Western North America	Rivera et al 2016
1.10286566	0.561227341	NA	233.9491488	5.617693434	NA	NA	NA	NA	921.8569344	NA	12.14437765	6.034286149	22.88950566	1.831840318	9.94304487	5.415141207	0.372489538	25.80263955	9.253788719	108.1418027	36.90215323	153.3131059	38.43102307	412.2001568	43.5613133	8817.938175	5.358292361	128.8669843	194.5467963	NA	13MFT-1 SPOT 375	North America	Western North America	Rivera et al 2016
1.10512985	0.384295517	NA	172.7307994	9.038644713	NA	NA	NA	NA	1811.371969	NA	4.004879388	0.474646155	8.802123037	0.349824852	6.31990621	13.01039216	1.795531039	57.84800063	19.7198204	215.1189711	69.56365967	270.8943842	57.53445779	537.4459752	66.40998248	9544.659571	2.081480835	95.03540932	94.91218002	NA	13MFT-4 SPOT 465	North America	Western North America	Rivera et al 2016
1.105822262	0.385739492	NA	235.7538195	6.452457119	NA	NA	NA	NA	1614.648235	NA	8.850867435	NA	16.31349482	0.261416369	4.539103155	9.415548412	0.45877536	49.00392165	15.02825243	183.2227942	62.55171076	250.6385944	56.68285129	586.9785199	63.69540542	9508.356775	4.596697499	177.3645777	206.5939208	NA	13MFT-2 SPOT 323	North America	Western North America	Rivera et al 2016
1.109747503	0.516295507	NA	260.2407254	7.698213481	NA	NA	NA	NA	1396.721244	NA	6.129447698	1.745592043	13.49655696	0.650551988	6.464858739	11.36559237	0.939458544	45.72727337	14.88572841	164.5693492	56.10261083	205.6269706	49.60143642	527.4408895	51.36017426	7089.39406	2.748669353	119.9962127	163.9387719	NA	13MFT-3 SPOT 471	North America	Western North America	Rivera et al 2016
1.111018516	0.510271922	NA	209.2366124	7.173396606	NA	NA	NA	NA	872.8162393	NA	11.43953286	3.038829598	18.71607431	0.578444875	4.905342079	7.695757779	0.257517425	25.06074817	8.816017935	103.8244466	36.05208951	138.7782198	34.21219648	381.8313744	38.77715001	9194.512687	4.360333164	112.2180784	169.367513	NA	13MFT-2 SPOT 359	North America	Western North America	Rivera et al 2016
1.112030418	0.087169141	NA	351.2748099	3.528331533	NA	NA	NA	NA	2937.583892	NA	76.09123654	0.013265637	35.01396034	0.067752614	1.596375398	7.072327168	0.009715399	48.21468915	21.79869919	286.6437096	108.4676128	460.0383041	109.0004687	1087.891274	131.3899837	14241.87586	28.33404848	1214.43106	1494.512778	NA	13MFT-6 SPOT 274	North America	Western North America	Rivera et al 2016
1.112927434	0.319036451	NA	270.7039103	11.81766099	NA	NA	NA	NA	1915.221465	NA	14.77529954	3.512173238	22.20346786	1.014890885	9.266226212	11.80715071	1.773071665	58.49929975	18.19979046	212.6212864	73.90918831	292.1635581	62.42375164	585.6866462	69.67358764	8718.356366	4.736984805	284.721589	190.5809615	NA	13MFT-6 SPOT 271	North America	Western North America	Rivera et al 2016
1.117717508	0.232804549	NA	203.804169	5.820543579	NA	NA	NA	NA	1120.18095	NA	12.71081954	0.135011468	15.72822679	0.10338529	2.089154928	4.049241534	0.215901289	25.47598616	9.10866044	117.5298586	40.47982745	173.4382989	42.76862435	419.7243823	52.82393457	12013.45485	5.066258901	156.016715	215.0998353	NA	13MFT-4 SPOT 451	North America	Western North America	Rivera et al 2016
1.120300029	0.632101437	NA	177.9201805	9.836067843	NA	NA	NA	NA	2627.937318	NA	4.720817243	3.299166741	9.113191984	1.287687312	13.16463539	22.66931286	3.058226744	94.62034854	27.87446773	299.4519997	103.9601318	382.1493202	81.79443795	738.6247657	87.90793545	8856.578876	2.025650437	146.06606	120.4170815	NA	13MFT-7 SPOT 615	North America	Western North America	Rivera et al 2016
1.124019794	0.038576688	NA	857.4460684	5.414457921	NA	NA	NA	NA	13330.4799	NA	409.3609639	0.006234415	163.5140351	0.332437745	7.331350293	30.04734901	0.143132347	221.916736	95.59034819	1243.215505	459.2047474	1910.134157	427.990753	3890.399443	499.8401422	13744.63794	95.42075989	8277.962473	8101.486265	NA	13MFT-5 SPOT 702	North America	Western North America	Rivera et al 2016
1.125106424	0.760797086	NA	187.9551845	15.49046399	NA	NA	NA	NA	2036.3948	NA	5.106932435	0.110831755	5.787681187	0.525957159	8.225513414	16.81969584	4.49856276	78.72397511	23.63940384	261.5045956	83.05546401	306.2148228	69.548441	711.341213	70.33253979	6508.213927	1.831780851	101.664347	118.224383	NA	13MFT-2 SPOT 400	North America	Western North America	Rivera et al 2016
1.128911275	0.169347311	NA	489.7031829	5.792780055	NA	NA	NA	NA	5351.850283	NA	43.38522291	0.116446787	45.73778438	1.124524255	16.50972016	36.28777417	2.351511336	188.1037092	59.72772331	669.0218963	215.3063999	807.343146	184.320128	1918.706481	170.8499361	6290.766832	11.36420191	694.7799195	689.0032454	NA	13MFT-2 SPOT 310	North America	Western North America	Rivera et al 2016
1.129583044	0.048985662	NA	1041.134348	7.610483866	NA	NA	NA	NA	18131.44966	NA	616.7868306	0.031659667	225.6001171	0.610162581	13.36556514	50.01409263	0.158172535	334.2065736	141.4557743	1808.329045	635.7333062	2571.182396	571.276543	5317.478145	637.599683	13375.46616	126.6935983	17178.35085	11959.10615	NA	13MFT-7 SPOT 606	North America	Western North America	Rivera et al 2016
1.135252837	0.087039203	NA	942.587017	6.482711945	NA	NA	NA	NA	6420.547427	NA	217.6968925	30.21572081	139.3744144	9.344302793	48.1992036	25.69077867	0.520337259	131.2059705	48.11964055	612.4491263	224.7384346	943.454576	221.5563011	2292.468637	218.5290723	10734.11736	63.35004304	3174.535643	4649.680294	NA	13MFT-1 SPOT 343	North America	Western North America	Rivera et al 2016
1.137883847	0.44619958	NA	461.0077367	18.19449729	NA	NA	NA	NA	5319.31856	NA	16.2950703	0.738343206	53.61606958	1.591999641	22.62724752	42.96587493	5.552362058	196.8128342	59.44162615	638.1167731	213.9655909	756.7961079	173.1890517	1657.30066	178.5494124	9419.170208	4.138198061	929.0626247	456.6011	NA	13MFT-3 SPOT 517	North America	Western North America	Rivera et al 2016
1.141767663	0.445038227	NA	254.8330352	4.828210546	NA	NA	NA	NA	863.9090245	NA	10.01588736	2.671824512	17.28670022	0.692447238	5.970458193	5.083654287	0.454104679	23.91497114	7.320970845	93.25480214	32.15472203	137.0614191	32.54204527	334.6868746	36.97499526	9024.810184	4.597197551	104.3018482	166.6614424	NA	13MFT-7 SPOT 549	North America	Western North America	Rivera et al 2016
1.143559034	0.082409458	NA	554.1982922	6.165908264	NA	NA	NA	NA	5816.004624	NA	172.1352573	0.173478573	70.35634467	0.28922127	4.825272498	16.8630492	0.210167302	109.1069406	44.74140828	576.5178293	204.0961008	857.5119217	203.1050776	2026.189981	213.8415712	10487.20138	46.1965077	2132.042497	3099.67225	NA	13MFT-1 SPOT 339	North America	Western North America	Rivera et al 2016
1.146206295	0.380642256	NA	281.0968176	7.278905524	NA	NA	NA	NA	913.7937919	NA	9.79061034	1.973690081	15.26870045	0.459123119	3.912567332	5.017180621	0.343906466	22.3676474	7.89537589	100.9262576	35.58811948	150.6480651	34.69535837	357.6111519	40.40898332	9569.26	4.42301389	108.4934062	143.7840585	NA	13MFT-3 SPOT 519	North America	Western North America	Rivera et al 2016
1.147421139	1.047103907	NA	168.1943496	18.59197658	NA	NA	NA	NA	1566.322395	NA	2.648068624	0.612549834	6.066131088	0.505657438	11.93744007	18.87021863	3.341077276	58.86565758	18.54887207	198.6487856	63.84200432	228.5344669	53.16287275	542.6354148	53.0757301	7612.42367	0.935350895	64.38100534	75.08864234	NA	13MFT-3 SPOT 487	North America	Western North America	Rivera et al 2016
1.147614106	0.243144346	NA	242.8487482	11.02363884	NA	NA	NA	NA	4911.591447	NA	12.41366625	0.835306229	15.58931378	1.002136564	18.65374162	33.26451097	6.116732044	175.5139163	54.887494	585.6428486	188.090256	691.077724	142.7536092	1286.889236	154.9765162	9069.510733	4.01860058	321.9535137	218.6595062	NA	13MFT-7 SPOT 566	North America	Western North America	Rivera et al 2016
1.151222293	0.410482405	NA	163.5226106	8.90828658	NA	NA	NA	NA	1322.867824	NA	3.569717306	0.537733626	8.363138799	0.488881826	5.106350788	8.657778494	1.893006531	46.41958365	13.95324669	159.3536029	51.17660176	194.9783063	43.41310828	449.5479318	47.27800773	7005.571775	1.457716028	78.87935957	103.4587168	NA	13MFT-5 SPOT 664	North America	Western North America	Rivera et al 2016
1.153760741	0.368243313	NA	284.7346113	5.781282439	NA	NA	NA	NA	1610.964626	NA	11.47211684	6.461292012	28.64959417	1.495224298	11.91874497	11.27128305	0.898583134	48.33939056	16.81821123	192.8005384	65.10732651	254.623481	59.75889467	639.4539549	59.42512455	8556.759588	4.441562061	177.2760059	248.2942136	NA	13MFT-3 SPOT 538	North America	Western North America	Rivera et al 2016
1.153870232	0.038926682	NA	4647.202238	38.10700148	NA	NA	NA	NA	40645.73163	NA	218.0228543	76.72121173	415.0869281	26.6761024	184.5405998	157.2368952	0.844644882	664.508131	268.6911497	3305.68342	1180.634895	5049.934202	1282.051526	12970.59138	1473.039903	17598.2618	133.6459067	28335.13908	20028.23348	NA	13MFT-1 SPOT 365	North America	Western North America	Rivera et al 2016
1.154178309	0.100552327	NA	1141.924904	7.40189821	NA	NA	NA	NA	12284.06625	NA	230.1316844	2.4847935	154.0597519	1.513529774	19.94098843	47.6953156	0.470109095	267.512107	98.98803124	1241.228348	429.6810101	1723.465515	403.7255931	4050.806869	391.3037297	9280.265484	46.41435876	6523.055369	6071.85338	NA	13MFT-1 SPOT 351	North America	Western North America	Rivera et al 2016
1.157450031	0.28496652	NA	204.3145657	5.852985133	NA	NA	NA	NA	976.7474612	NA	11.29576016	0.854733039	15.23233732	0.352464745	2.816327261	4.181934341	0.478159777	24.67504364	8.538589537	110.7089338	37.68317016	155.0798104	37.01173555	369.5126344	41.84696713	9578.281174	4.491816656	135.7740631	204.2716889	NA	13MFT-6 SPOT 291	North America	Western North America	Rivera et al 2016
1.158930543	0.191223286	NA	220.4225024	6.418354673	NA	NA	NA	NA	1240.631692	NA	7.522518381	NA	25.12858376	0.048835765	1.137279501	5.403294673	0.219110273	29.39934345	9.91687079	128.1626407	45.51343292	195.7006784	46.482059	456.5345575	61.28231429	12135.65009	3.702063839	196.4199901	186.400619	NA	13MFT-6 SPOT 263	North America	Western North America	Rivera et al 2016
1.167713483	0.522182146	NA	479.8907349	10.37002719	NA	NA	NA	NA	3000.564907	NA	10.21416782	14.88425116	39.65768255	4.675427984	32.96400755	33.12287959	3.74200552	120.8520722	38.33429187	390.3254609	124.5089483	470.2482595	102.6203702	946.6146917	107.2512506	7953.515646	3.441528847	254.9424106	206.7401216	NA	13MFT-2 SPOT 396	North America	Western North America	Rivera et al 2016
1.174917509	0.066545278	NA	953.0955893	6.05046168	NA	NA	NA	NA	11724.33088	NA	245.1691942	0.141105416	151.4451302	0.645492798	14.53311794	40.12657632	0.377497799	236.8858412	94.93448725	1159.551156	413.934257	1746.330995	406.4627332	4116.536331	411.2329309	9612.548565	50.34641706	5853.698571	6629.031671	NA	13MFT-1 SPOT 415	North America	Western North America	Rivera et al 2016
1.181806127	0.564552102	NA	135.5264385	4.650316426	NA	NA	NA	NA	653.1252023	NA	6.729006279	0.053126608	9.359312834	0.019435863	1.00944149	2.291090427	0.244944682	12.89213483	5.321665533	66.82762139	23.86132634	107.3116254	25.39883903	282.6397527	29.12866633	9339.514115	3.467914223	55.05344847	121.6024316	NA	13MFT-1 SPOT 428	North America	Western North America	Rivera et al 2016
1.181880087	0.167312653	NA	478.4085135	4.803427545	NA	NA	NA	NA	5316.519901	NA	44.73983336	0.060067896	46.84774445	0.933578643	17.92857018	36.19986525	2.727039311	183.214633	60.53381265	681.2203638	218.3528601	800.8780592	182.4871984	1879.218538	172.1293705	6377.822829	11.39394304	681.1229431	680.1047323	NA	13MFT-2 SPOT 311	North America	Western North America	Rivera et al 2016
1.182962238	0.295608471	NA	180.0950129	6.371646545	NA	NA	NA	NA	2039.514454	NA	5.733035575	0.066768835	12.36620094	0.454351644	8.73008045	15.40341122	1.794213437	68.50513903	22.86726417	251.9839552	83.13830796	310.7436282	71.56934276	698.916982	67.84801486	7621.435033	2.652729782	175.0787377	199.5068504	NA	13MFT-1 SPOT 432	North America	Western North America	Rivera et al 2016
1.183428053	0.563441317	NA	296.0028624	9.819193348	NA	NA	NA	NA	1030.762119	NA	9.449200499	3.098409667	17.38838072	0.939443788	7.58732733	6.495699805	0.912502366	28.8215898	10.16802673	115.8118966	40.63928446	165.4310474	38.99636847	425.9992662	42.68530594	8571.482866	4.242841453	128.3963637	168.3718061	NA	13MFT-2 SPOT 382	North America	Western North America	Rivera et al 2016
1.185010418	0.311741615	NA	275.1229542	5.362803654	NA	NA	NA	NA	1140.742683	NA	12.0004281	2.930083946	18.74131494	0.761767896	5.908693022	6.059057811	0.448646658	31.27401095	10.52274618	124.7565045	44.38820189	181.114384	42.16952022	446.3517482	47.78126335	9572.950065	5.599127496	166.2442227	212.0455988	NA	13MFT-2 SPOT 389	North America	Western North America	Rivera et al 2016
1.189285085	0.315828046	NA	160.3436756	6.425695069	NA	NA	NA	NA	690.4120265	NA	7.130810045	NA	9.911372355	0.07061251	1.594185698	2.961732227	0.305931098	17.65036192	6.656423356	76.68144275	25.33212972	107.5037873	26.03616624	279.4281256	29.44008276	8341.143207	2.896397874	68.17375	122.0377675	NA	13MFT-1 SPOT 440	North America	Western North America	Rivera et al 2016
1.189634245	0.090266049	NA	774.7128674	6.09021288	NA	NA	NA	NA	9881.730062	NA	111.0320408	0.109790209	88.02408094	0.599359971	12.61908477	32.10691153	0.291310179	197.3231432	75.75784537	961.7615556	347.6996501	1383.585539	332.2570031	3306.752249	342.9263391	10422.12577	28.44301869	3479.274185	4414.172672	NA	13MFT-1 SPOT 429	North America	Western North America	Rivera et al 2016
1.189923242	0.206863381	NA	508.8961832	3.429356436	NA	NA	NA	NA	2442.196057	NA	21.96659384	0.050619311	33.97945492	0.163798281	3.84375877	8.981764966	0.253298757	48.21040524	19.70569654	243.2998125	92.54362547	388.4122468	95.93796195	1010.139073	105.803983	10519.8246	9.182541119	572.0475637	670.588748	NA	13MFT-7 SPOT 594	North America	Western North America	Rivera et al 2016
1.190823521	0.576591998	NA	182.8006433	7.433500338	NA	NA	NA	NA	1187.368399	NA	8.0501909	0.14235918	10.82494047	0.206488396	4.318368528	9.069594425	1.169972474	34.81795774	13.02150037	144.5182497	46.72198437	180.6558168	44.39044748	470.6212932	42.40207109	6955.823659	2.991928393	114.798631	156.5042424	NA	13MFT-2 SPOT 360	North America	Western North America	Rivera et al 2016
1.191737852	0.083740817	NA	1059.572012	4.57813681	NA	NA	NA	NA	3570.058545	NA	104.9627575	20.7426508	88.26752445	5.497326342	32.53165647	15.36101491	0.301949098	69.60338888	27.27966682	354.0500289	132.6985026	571.9638438	131.1620371	1339.836088	142.4834478	10396.14879	34.85810625	1819.562048	2710.97078	NA	13MFT-1 SPOT 340	North America	Western North America	Rivera et al 2016
1.194343973	0.077239243	NA	1007.503311	7.264743952	NA	NA	NA	NA	11809.5003	NA	388.5473584	0.077478866	141.475831	0.416519177	8.496704156	29.06557761	0.179039212	209.6776864	90.13231013	1195.406072	436.9866543	1797.949016	414.9313386	3991.440405	404.975592	10417.35932	81.18837475	7125.081332	8818.536934	NA	13MFT-4 SPOT 491	North America	Western North America	Rivera et al 2016
1.195609337	0.036627137	NA	1140.772762	4.512742474	NA	NA	NA	NA	14389.57149	NA	187.9013584	0.130712169	156.4986858	1.05699498	18.0907762	49.45603315	0.124718792	289.017722	119.3441232	1466.750784	504.0242179	2046.066029	478.2075874	4686.341761	460.1310155	9734.053522	39.22835635	6499.850141	6729.393715	NA	13MFT-7 SPOT 510	North America	Western North America	Rivera et al 2016
1.196152851	0.30008329	NA	199.1742841	5.929095214	NA	NA	NA	NA	1974.850742	NA	11.33944595	0.334298939	17.74942405	0.322163883	4.611548609	9.15432644	0.716404914	50.18337483	17.43119461	216.7899909	75.31480763	295.3313567	67.11657792	641.3110417	80.57932095	11428.56829	5.042745118	213.019818	233.2548393	NA	13MFT-7 SPOT 603	North America	Western North America	Rivera et al 2016
1.197765023	0.606076421	NA	145.7966184	10.55689268	NA	NA	NA	NA	1952.88476	NA	4.271217922	0.062825001	5.928936919	0.424515134	8.649134066	17.74132247	3.749792916	78.50772654	21.74034922	244.4137559	79.87154915	285.7312202	64.11308273	685.6741779	63.67239746	6486.528815	1.727303175	84.89731322	109.9502143	NA	13MFT-2 SPOT 401	North America	Western North America	Rivera et al 2016
1.204464587	0.059783468	NA	1348.943898	11.11596543	NA	NA	NA	NA	17324.05519	NA	119.0682641	23.25838533	277.407155	10.9437204	80.58967271	92.69350649	0.869399765	445.2506459	157.744651	1787.250953	619.6328244	2415.87451	551.2218631	5335.072313	508.1729967	8003.655879	20.82815461	7461.444849	5510.734295	NA	13MFT-1 SPOT 345	North America	Western North America	Rivera et al 2016
1.204939371	0.245344516	NA	194.0502871	4.778336389	NA	NA	NA	NA	914.9551006	NA	12.34059219	0.026381422	13.42286882	0.083559479	1.758963182	3.480783873	0.268940693	23.8871198	8.541536267	100.2797302	35.56086328	146.1017741	36.41778059	379.6533103	38.99086694	8721.397174	4.810969754	115.7008902	194.3921459	NA	13MFT-7 SPOT 537	North America	Western North America	Rivera et al 2016
1.205700396	0.081169988	NA	685.2237578	6.621115417	NA	NA	NA	NA	11374.68328	NA	94.15413675	0.084537864	91.92209872	0.957441892	18.13436722	43.53892422	0.73561309	262.0426838	94.02042348	1126.953587	401.3805678	1635.019017	345.0430097	3118.689545	396.9511846	12455.66004	25.57390124	2278.902195	2100.533402	NA	13MFT-7 SPOT 565	North America	Western North America	Rivera et al 2016
1.206538369	0.266726133	NA	211.0075353	6.010740869	NA	NA	NA	NA	1191.160989	NA	11.63375732	0.376552339	19.4371746	0.124215365	1.336478273	3.509241032	0.152007177	25.90721284	9.797168889	118.0793662	43.58190786	191.1465576	43.27244619	435.873414	57.9840446	12518.74811	5.125990314	183.1433952	223.2764304	NA	13MFT-5 SPOT 629	North America	Western North America	Rivera et al 2016
1.206963346	0.050534388	NA	1329.20489	7.384349255	NA	NA	NA	NA	23780.64973	NA	383.6013134	0.788937998	298.091002	1.731368818	30.73580098	80.80887518	0.319975264	493.4511013	201.1789735	2463.328605	855.0024358	3466.874677	766.5718104	7020.315991	808.7493299	10798.95545	55.07234753	14438.10862	9891.164881	NA	13MFT-4 SPOT 458	North America	Western North America	Rivera et al 2016
1.208293388	0.070955477	NA	751.4441933	6.122528089	NA	NA	NA	NA	9964.902697	NA	257.2335588	0.125545341	125.1180212	0.31034816	7.133661144	24.10318134	0.286011743	174.0533492	70.90472895	925.9133368	337.4048577	1458.922939	332.9110772	3146.987675	379.016348	13464.12392	66.46309785	5408.659421	5441.34774	NA	13MFT-4 SPOT 461	North America	Western North America	Rivera et al 2016
1.209608894	0.46071156	NA	168.6012654	10.64663568	NA	NA	NA	NA	3188.276835	NA	6.017174488	0.06982693	8.556856689	0.538412896	12.575808	26.07521886	4.720425904	122.2229321	36.52440296	398.4587286	126.6142343	477.3173604	104.7829505	925.912515	105.3611456	8912.054148	2.326880378	160.6087816	133.187254	NA	13MFT-3 SPOT 429	North America	Western North America	Rivera et al 2016
1.210162873	0.765250714	NA	148.7275834	8.600933706	NA	NA	NA	NA	1416.937842	NA	4.411341723	0.247734265	7.090977866	0.49665171	7.188285749	12.91142419	2.07145986	54.21104884	16.5777252	178.8497949	59.62704189	207.0832223	49.36711203	518.202357	50.50833841	6832.011635	1.322916987	79.5023572	94.65232346	NA	13MFT-3 SPOT 460	North America	Western North America	Rivera et al 2016
1.213208403	0.294626811	NA	198.6784446	11.42860656	NA	NA	NA	NA	4563.768841	NA	10.06703507	0.627873883	15.67236367	1.202463565	19.54147345	33.57000675	6.821009693	156.5317391	51.90312715	571.6415217	189.619317	653.1616777	132.2997352	1215.836484	153.6198978	9205.967061	3.427418036	270.8799791	190.4195789	NA	13MFT-7 SPOT 568	North America	Western North America	Rivera et al 2016
1.213554865	0.603309679	NA	190.0141551	12.79896325	NA	NA	NA	NA	3442.635836	NA	7.577737108	0.072805248	9.735646092	0.661036224	12.85440044	28.71855849	3.840885435	129.5509281	38.2821888	429.8779256	140.6850559	515.6517836	107.7414625	996.461343	123.7583865	9117.872964	3.710756044	160.3519329	139.8903334	NA	13MFT-7 SPOT 1161	North America	Western North America	Rivera et al 2016
1.213738866	0.073037006	NA	631.8985857	5.163063111	NA	NA	NA	NA	8439.615877	NA	158.8293201	0.555294259	81.14917398	0.551243199	8.951162632	21.6947816	0.378730344	152.2166371	62.05444911	795.9553979	296.8088827	1222.892335	280.1439056	2674.065802	322.1363545	12003.52154	41.46628388	2566.140896	3231.459025	NA	13MFT-7 SPOT 617	North America	Western North America	Rivera et al 2016
1.21689944	0.375234746	NA	218.8554928	8.504077713	NA	NA	NA	NA	2054.766147	NA	5.686675825	0.059763455	10.86173022	0.425118487	8.560580536	15.98020796	2.379576941	68.31054577	22.43543001	258.5019481	82.69554776	318.2264334	72.30076427	698.5324819	69.5969709	7632.686247	2.325570165	138.3743342	147.0062853	NA	13MFT-6 SPOT 290	North America	Western North America	Rivera et al 2016
1.22153218	0.070866346	NA	1081.491787	7.610394156	NA	NA	NA	NA	15068.35943	NA	430.7261786	2.928480033	206.4322469	1.655061053	18.23618225	47.5070553	0.256474009	284.6414433	113.2475967	1483.638534	515.7931604	2107.293535	483.2473295	4462.759885	512.9651381	11534.54461	83.41225881	12506.16151	8929.554337	NA	13MFT-4 SPOT 459	North America	Western North America	Rivera et al 2016
1.221943054	1.10028082	NA	417.9489757	12.9341183	NA	NA	NA	NA	1268.621012	NA	3.340050352	7.974419573	17.88205673	2.200327627	15.26814791	13.39764644	2.702945889	50.25960138	14.54332711	157.2882562	50.2692603	191.1599337	42.98679035	443.0300079	43.00127769	6190.872949	1.6891851	60.92019069	83.16163702	NA	13MFT-2 SPOT 357	North America	Western North America	Rivera et al 2016
1.223621198	0.043134118	NA	1349.950735	11.38341277	NA	NA	NA	NA	21837.58712	NA	665.4237716	46.11131723	386.8245876	13.37169516	85.86415321	88.26741647	0.444928505	482.3451041	182.7097762	2205.434361	759.7678501	3027.395934	648.9982255	5895.772059	697.4867932	11049.34433	111.4683593	24044.62285	13821.55346	NA	13MFT-4 SPOT 457	North America	Western North America	Rivera et al 2016
1.223728419	0.285241038	NA	473.3414393	9.646953291	NA	NA	NA	NA	5762.501091	NA	35.77621395	0.516417104	35.83837324	1.373026887	19.68741411	33.47883886	3.518119063	183.3694721	58.2803858	680.2031881	231.2995491	854.6344852	186.5041205	1888.124781	182.4712942	8204.690662	9.384084348	874.3632543	633.0577184	NA	13MFT-3 SPOT 505	North America	Western North America	Rivera et al 2016
1.227229271	0.404279584	NA	184.8321455	5.949746276	NA	NA	NA	NA	1088.35003	NA	12.07734273	0.687009946	16.7330368	0.310097915	2.744094375	5.049421066	0.218235202	25.09787991	9.056106244	112.0377579	41.60690264	167.5448081	41.38099424	405.3495795	46.61810173	11880.92523	5.74817994	137.9265693	183.8114976	NA	13MFT-3 SPOT 440	North America	Western North America	Rivera et al 2016
1.227826133	1.032462199	NA	275.5505782	13.68709614	NA	NA	NA	NA	2811.815289	NA	5.173427321	4.422487686	15.33471653	1.666017586	19.72553554	29.84409904	4.613401911	107.4376506	34.95850979	369.1700724	110.6746947	429.2793256	94.22934818	964.3000459	97.02467819	7817.625211	2.270811519	163.449214	165.7563829	NA	13MFT-2 SPOT 383	North America	Western North America	Rivera et al 2016
1.230429027	0.227687861	NA	186.2232621	7.093456282	NA	NA	NA	NA	978.7027267	NA	21.78826945	0.04441287	11.33749769	0.051065222	1.130219373	4.042392542	0.353824218	23.99486428	8.776077818	105.0183091	37.74561877	162.8682373	38.75314901	412.2884442	42.16054859	8490.007064	8.146963406	232.0814387	434.490952	NA	13MFT-1 SPOT 344	North America	Western North America	Rivera et al 2016
1.234893646	0.429897382	NA	167.4581766	8.161546942	NA	NA	NA	NA	1471.948612	NA	6.479891286	NA	6.187644672	0.368268007	6.483942206	12.44822522	2.142514663	58.17931623	17.43980307	193.6738235	61.36946961	218.6358796	50.14732845	527.8760059	52.12044291	7547.739311	2.697480825	86.94428575	130.7953619	NA	13MFT-2 SPOT 369	North America	Western North America	Rivera et al 2016
1.236932383	0.781622345	NA	114.0842002	10.40508639	NA	NA	NA	NA	1818.27565	NA	3.669303388	0.087472718	5.502343626	0.385465667	7.123353306	13.06267658	2.899781785	61.79444979	19.68704704	221.5935715	72.11480139	274.5499229	59.0029654	530.7012927	70.50271157	8544.702303	1.541904977	71.23425086	69.79866459	NA	13MFT-6 SPOT 262	North America	Western North America	Rivera et al 2016
1.237938851	0.522328615	NA	142.8579916	11.42259587	NA	NA	NA	NA	2872.879865	NA	5.578733725	0.138673945	7.360268561	0.613766836	10.97477456	21.25070423	4.215085258	109.0108535	31.64806121	352.6769361	118.8772118	425.3424143	86.77893003	755.5542259	97.59424973	8623.656536	2.377649325	138.8235135	116.1829311	NA	13MFT-5 SPOT 700	North America	Western North America	Rivera et al 2016
1.238756835	0.501357016	NA	212.895889	5.568668375	NA	NA	NA	NA	1256.419719	NA	15.59386417	NA	16.46259402	0.051335421	2.128239875	5.136249338	0.131089194	28.33890001	10.71973052	131.8264162	46.72523121	194.7851791	48.14540011	494.7506351	55.72944963	12480.74699	7.407015671	192.6313524	270.5674516	NA	13MFT-3 SPOT 490	North America	Western North America	Rivera et al 2016
1.239331242	0.327976399	NA	311.740126	5.961236327	NA	NA	NA	NA	1191.835215	NA	12.03982553	6.450658811	25.26617969	2.040829343	11.04382237	7.018109953	0.536907094	30.80663863	10.35423629	129.8953511	43.82147498	190.7469583	43.35404224	418.4516936	54.04430593	10988.53563	4.996820551	152.3804102	171.1041534	NA	13MFT-5 SPOT 698	North America	Western North America	Rivera et al 2016
1.242672924	0.44492223	NA	248.5052056	5.186938025	NA	NA	NA	NA	1422.688123	NA	16.2040948	0.024626974	19.74107241	0.071024211	1.883725526	5.873378371	0.51190121	32.86081915	11.6915408	151.4346856	54.58572685	228.9844423	51.98622054	546.2996876	66.00676326	13132.40613	6.08582681	210.7137385	302.9684558	NA	13MFT-4 SPOT 469	North America	Western North America	Rivera et al 2016
1.248084106	0.283782986	NA	198.5232139	5.323903218	NA	NA	NA	NA	875.490194	NA	11.58456683	0.039828711	13.33121839	0.043833371	1.53204916	3.489929715	0.295819431	20.6036539	7.801049856	93.18897947	32.71766828	131.4283687	31.99560794	349.001903	35.77018767	8444.189336	4.397160823	123.6975498	191.5394125	NA	13MFT-7 SPOT 586	North America	Western North America	Rivera et al 2016
1.248661519	0.54702605	NA	180.4824468	4.998058373	NA	NA	NA	NA	871.2793072	NA	9.016741371	3.674279902	18.57052817	0.814145555	6.848124376	4.188723893	0.307399297	19.72820992	6.921007494	86.09120155	32.98187391	133.774696	31.33223015	305.4293756	37.62745139	11493.32844	4.070180245	85.77984369	120.416696	NA	13MFT-1 SPOT 332	North America	Western North America	Rivera et al 2016
1.248870594	0.31984364	NA	322.654748	3.634083328	NA	NA	NA	NA	2483.163702	NA	13.4709228	NA	31.45181423	0.176471736	2.896610575	11.16428041	0.176263848	62.63766677	21.87557576	271.4287879	92.77387467	376.5789366	96.49971662	1039.280442	97.44902044	10022.38012	6.768824172	508.2521588	640.1104658	NA	13MFT-2 SPOT 409	North America	Western North America	Rivera et al 2016
1.250494905	0.24523135	NA	280.5231773	6.184118833	NA	NA	NA	NA	3290.71519	NA	24.20501114	0.288514598	32.21343406	0.717907012	11.55659469	27.54587046	1.876579181	113.8276188	37.06036687	414.6650934	134.3838741	497.3982064	113.9278142	1142.442581	106.1848789	6659.339583	8.21440289	362.6411648	363.6616451	NA	13MFT-2 SPOT 364	North America	Western North America	Rivera et al 2016
1.254330417	0.540598033	NA	135.3706616	8.395071187	NA	NA	NA	NA	1107.445833	NA	3.880881116	NA	6.200751322	0.153097283	3.205573476	7.991079141	0.954484579	37.76615559	11.49069398	135.2957481	44.88509686	170.5404046	38.45060991	370.0031809	44.73054615	10470.10731	2.373610151	60.66585109	73.63033124	NA	13MFT-3 SPOT 421	North America	Western North America	Rivera et al 2016
1.258145595	0.213849011	NA	192.5097176	5.38177702	NA	NA	NA	NA	1224.200713	NA	13.53889382	NA	14.583501	0.032002394	1.381772372	4.904308875	0.242148837	25.14699009	9.253878054	121.1044419	44.78825811	188.4740066	43.04472085	417.0041649	58.74613941	12416.24387	5.987693164	175.7090721	227.1648042	NA	13MFT-5 SPOT 627	North America	Western North America	Rivera et al 2016
1.266407229	0.458978916	NA	193.893463	6.473813866	NA	NA	NA	NA	1278.885319	NA	15.91240334	0.027878385	17.91696994	0.04602699	2.279197578	6.422978332	0.299710887	34.28010701	11.21827215	141.0876814	50.61601928	197.4421098	48.71888944	514.7418218	54.28467138	10920.29665	6.702175988	179.8025545	240.0616469	NA	13MFT-3 SPOT 437	North America	Western North America	Rivera et al 2016
1.26699386	0.105505926	NA	297.5598906	6.141232504	NA	NA	NA	NA	1388.014507	NA	14.6645643	NA	27.18031812	0.081800126	1.378087321	6.786591935	0.263962952	30.48669684	10.93247953	146.6695568	53.29931351	217.2496401	54.646367	575.6986329	60.68187591	9912.482628	6.347016019	327.4955619	404.3966899	NA	13MFT-5 SPOT 652	North America	Western North America	Rivera et al 2016
1.26824189	0.372612344	NA	220.2545353	4.662215041	NA	NA	NA	NA	878.4695632	NA	11.29675887	NA	14.39904923	0.033249153	1.968229118	4.779335392	0.228760727	22.74038812	7.708035136	99.20093435	34.80991577	143.1120855	34.96775346	371.5140972	37.23222909	8001.612821	4.882461398	128.7971693	205.8731575	NA	13MFT-2 SPOT 419	North America	Western North America	Rivera et al 2016
1.26991702	0.177702639	NA	488.100083	9.981804762	NA	NA	NA	NA	2709.460373	NA	24.82802896	NA	57.36983315	0.377863649	8.352210187	14.59686707	0.712053775	76.01508001	25.21867817	289.9422967	102.1354427	418.9935633	96.32650161	976.0177359	114.340629	8442.4587	7.304235144	1352.414762	786.517704	NA	13MFT-7 SPOT 551	North America	Western North America	Rivera et al 2016
1.270072898	0.663324729	NA	212.0022366	14.05176354	NA	NA	NA	NA	2093.728104	NA	4.861046117	1.394607864	9.141633549	1.178625828	15.02376587	21.68019962	6.028882341	89.29398118	27.08699937	267.4984566	87.37580702	320.1563976	73.65558279	761.6758332	73.01320176	6322.986469	1.444435021	102.2211921	118.196943	NA	13MFT-2 SPOT 370	North America	Western North America	Rivera et al 2016
1.271376831	0.474526051	NA	244.2295756	9.076192469	NA	NA	NA	NA	879.1986152	NA	8.876276157	0.906152607	12.17226635	0.302015237	2.316449014	4.769565059	0.649448917	22.72782973	8.007500889	98.37513421	33.7471935	137.7938981	32.68111675	361.5081799	35.59976643	8228.235723	4.194274898	105.8275374	155.1939171	NA	13MFT-3 SPOT 537	North America	Western North America	Rivera et al 2016
1.274957253	0.415978018	NA	246.2196631	6.596432355	NA	NA	NA	NA	920.6812529	NA	13.36070421	4.578599598	21.1054305	1.145365786	8.174371284	6.911949434	0.529227743	25.5550801	8.552183995	110.4865325	35.07587184	144.4170217	36.63634138	414.3335566	38.55284324	8179.3154	4.993486665	118.377466	201.4062461	NA	13MFT-3 SPOT 475	North America	Western North America	Rivera et al 2016
1.275454016	1.552650089	NA	129.5714384	10.55423893	NA	NA	NA	NA	2178.249532	NA	5.42433282	0.097245338	7.898324057	0.495432723	8.796930524	17.98789378	3.334884141	78.90809301	23.9011729	274.0054386	85.52879439	318.5799099	65.63406945	659.4333689	77.34842743	8931.036663	2.136728008	107.0315771	100.9022708	NA	13MFT-6 SPOT 276	North America	Western North America	Rivera et al 2016
1.279266013	0.51487877	NA	218.3984461	5.944752359	NA	NA	NA	NA	971.4834412	NA	14.41893657	0.178571605	16.31183441	0.076994563	2.248512779	5.631296832	0.224766184	25.83153529	8.0902893	103.5876446	38.3166335	149.0737356	36.97443002	407.7648074	40.03271304	8604.669699	4.878354265	127.3623314	206.0851817	NA	13MFT-1 SPOT 352	North America	Western North America	Rivera et al 2016
1.285995281	0.590946153	NA	215.2468343	6.498523411	NA	NA	NA	NA	959.2346377	NA	11.27035172	1.644192628	16.62363152	0.700447278	5.32064727	7.361811423	0.256552465	27.51091629	8.664326413	111.6139557	37.32972393	152.4401809	37.00791101	407.8381349	38.5665895	8156.293896	5.40707529	126.7893439	217.8362847	NA	13MFT-7 SPOT 525	North America	Western North America	Rivera et al 2016
1.286085082	0.113795057	NA	919.5314416	7.372909147	NA	NA	NA	NA	13012.80028	NA	175.3067502	32.99547206	189.476013	12.56920454	68.97034022	70.34683115	0.861265412	301.2846795	125.2569133	1500.301712	513.8034946	2080.754758	478.86167	4522.576855	450.9739595	11272.26548	35.27016109	4134.08414	4057.577535	NA	13MFT-3 SPOT 513	North America	Western North America	Rivera et al 2016
1.290113463	0.193484802	NA	337.4724251	5.862005565	NA	NA	NA	NA	1866.184381	NA	27.26387583	0.090605285	29.59285028	0.116741238	2.042250462	6.796468797	0.119243317	39.38518522	14.99420535	196.4957787	71.76797005	297.6439312	72.02828224	761.4164796	82.2422662	10929.54099	10.87480012	648.4617209	735.1635132	NA	13MFT-3 SPOT 510	North America	Western North America	Rivera et al 2016
1.290180564	0.440406416	NA	165.5372812	6.424456679	NA	NA	NA	NA	909.7087993	NA	11.79760422	0.145209953	14.99147547	0.071410558	1.511064067	4.887000025	0.392117425	25.30141016	8.367698069	103.7896108	36.6464532	142.3720132	34.5937402	372.9762054	40.06197208	9138.109827	4.86465492	117.51227	197.0345184	NA	13MFT-5 SPOT 654	North America	Western North America	Rivera et al 2016
1.290967122	0.379995119	NA	220.0681407	8.235858192	NA	NA	NA	NA	1692.991779	NA	5.326192697	NA	10.99219106	0.330711968	4.695124381	10.97845619	1.554611909	54.23893984	17.89144079	199.0024647	66.71703577	253.7061151	58.82077588	622.8215333	60.91758318	7790.118535	2.277778005	128.3635867	160.7588692	NA	13MFT-7 SPOT 528	North America	Western North America	Rivera et al 2016
1.291465973	0.059354248	NA	908.4696275	5.324291964	NA	NA	NA	NA	13468.51701	NA	100.3994839	32.86174137	106.7847794	8.815433431	82.18621545	56.09266238	0.352606397	277.6444911	106.419352	1316.648778	469.5959931	1857.048875	410.3160739	3867.627521	474.465356	11650.73699	22.90350144	3627.85469	3711.324088	NA	13MFT-7 SPOT 608	North America	Western North America	Rivera et al 2016
1.292171362	0.535272848	NA	250.0516585	11.44853038	NA	NA	NA	NA	5824.753605	NA	14.14564916	0.134673508	13.43945919	1.317224994	26.54230936	54.24833029	11.90651155	243.9767587	71.97318984	772.8247462	243.7828916	873.2506096	190.5533285	1697.110963	192.5292064	8259.34791	4.063767861	347.4806012	228.0967047	NA	13MFT-3 SPOT 432	North America	Western North America	Rivera et al 2016
1.295791013	0.307453352	NA	301.1722969	7.840684362	NA	NA	NA	NA	4497.785896	NA	18.69694469	0.126851171	23.74045745	0.876487503	15.5665501	30.06065105	3.120181344	159.2686611	48.31583473	548.9720116	176.2580026	662.0673743	144.7300916	1342.238799	156.7476357	9442.23214	6.476838287	411.8616669	319.7060649	NA	13MFT-5 SPOT 691	North America	Western North America	Rivera et al 2016
1.297936411	0.35567158	NA	195.964888	13.78082128	NA	NA	NA	NA	2623.060845	NA	5.465038744	0.222475818	6.520286372	0.587726147	12.25431372	22.19267737	5.657907335	100.9802934	30.8144508	350.5137116	109.7827938	401.2899198	90.05349407	871.2695295	89.13582257	6770.503404	2.190399193	135.4919671	135.5342801	NA	13MFT-2 SPOT 386	North America	Western North America	Rivera et al 2016
1.304469567	0.388024858	NA	138.4156089	5.140379284	NA	NA	NA	NA	732.7187511	NA	9.411103071	0.018140011	10.98892837	0.035440277	1.13400178	3.823813471	0.401344959	19.11437643	6.205468932	82.58781732	28.10218503	116.0316314	26.80569366	293.3886018	33.06257153	7740.05537	3.724509115	88.05100622	137.5215035	NA	13MFT-6 SPOT 300	North America	Western North America	Rivera et al 2016
1.306155366	0.59817444	NA	164.9250011	12.93094556	NA	NA	NA	NA	2198.314742	NA	4.870846592	0.079049201	6.027777769	0.483315316	9.749743652	20.87573337	4.777132603	89.27490808	26.77620193	296.370798	90.36451048	332.459291	73.7835399	727.0408743	73.52643446	6917.572984	2.139354698	115.1548149	121.0890282	NA	13MFT-2 SPOT 404	North America	Western North America	Rivera et al 2016
1.306177593	0.25180016	NA	309.179184	7.775085937	NA	NA	NA	NA	1013.359425	NA	11.83690489	5.673422971	22.33959304	1.499753104	8.900478823	8.5105019	0.807683567	26.24683605	9.31346406	111.4060223	38.78299468	155.0397597	39.51183602	422.8084706	39.18176634	7524.101773	4.373268841	147.6306436	207.4800213	NA	13MFT-3 SPOT 462	North America	Western North America	Rivera et al 2016
1.309189469	0.406624197	NA	231.0743437	7.018452886	NA	NA	NA	NA	1051.001355	NA	11.49043777	0.252206779	16.24942888	0.081011137	2.53361753	6.060023858	0.335732141	27.26021991	10.44462361	113.3034693	40.90039823	163.2463347	40.86273635	439.9004212	43.4357274	8796.231247	4.945219232	159.153844	248.1289712	NA	13MFT-7 SPOT 591	North America	Western North America	Rivera et al 2016
1.312174591	0.065464607	NA	896.2152302	8.795950951	NA	NA	NA	NA	9206.932914	NA	146.5942091	3.1658056	107.3752491	1.660861701	18.11357183	35.25998013	0.351716887	191.7506404	75.41433981	917.7101605	314.6240324	1274.170179	301.248207	3067.217299	305.052856	9051.776019	33.04132266	4046.425097	4667.983338	NA	13MFT-7 SPOT 588	North America	Western North America	Rivera et al 2016
1.315534168	0.48420236	NA	170.809614	6.003594381	NA	NA	NA	NA	691.6035594	NA	9.45016189	1.076621904	11.51917179	0.256973587	2.430763702	3.573680362	0.288477179	18.35039936	5.899349952	78.29784546	27.40944421	111.4473931	26.65696737	304.2776849	28.80211644	8289.963054	3.930605112	77.03753152	128.9604723	NA	13MFT-3 SPOT 459	North America	Western North America	Rivera et al 2016
1.316	0.1	NA	620.5501375	13.1436377	NA	NA	NA	NA	9797.254511	NA	163.3739969	4.181299344	87.21950094	1.162830793	13.52046455	31.32898012	0.595205284	194.339364	77.38194465	973.2439987	344.2066093	1412.25006	328.3958875	2916.491086	340.7390029	10805.36684	38.34603578	2740.83808	3109.632173	NA	13MFT-4 SPOT 460	North America	Western North America	Rivera et al 2016
1.320618051	0.520717615	NA	170.3205904	18.7166252	NA	NA	NA	NA	1200.755761	NA	1.605403974	0.330386744	4.992332131	0.407474996	6.609158251	10.32951261	2.645529412	45.69899453	14.53179761	151.2428782	48.88496102	179.595082	40.9426268	407.1375163	43.6868252	7298.895043	0.760529911	50.50171315	63.9600897	NA	13MFT-6 SPOT 287	North America	Western North America	Rivera et al 2016
1.321511978	0.133711055	NA	183.5707824	1.948891312	NA	NA	NA	NA	791.3052439	NA	26.95163894	3.262516484	15.05601907	1.099113471	5.046203385	2.872422638	0.034906576	9.638536069	5.018568049	69.38340186	28.73455173	137.6933417	34.48084854	412.4443863	47.02950371	11202.93416	23.33412706	127.4475265	506.9562658	NA	13MFT-1 SPOT 354	North America	Western North America	Rivera et al 2016
1.321513883	0.442231172	NA	217.1697352	5.783794489	NA	NA	NA	NA	1131.000742	NA	15.13737812	0.255449935	18.81282855	0.106162596	2.047088008	6.442040204	0.334860701	28.58320962	11.06353965	128.0775593	44.40214812	182.0416685	47.47251155	494.3388108	47.33584968	9562.203349	5.703558833	175.2685113	275.1361175	NA	13MFT-3 SPOT 486	North America	Western North America	Rivera et al 2016
1.322013863	0.204742831	NA	253.4004488	3.894453375	NA	NA	NA	NA	1238.790817	NA	18.46201312	NA	20.24508535	0.107102534	1.616210284	3.711546473	0.130038802	25.52618573	9.601425908	131.9565857	46.93335796	201.3329302	50.57199159	550.6277882	54.55699811	9796.772907	8.379200851	258.6875303	453.6137598	NA	13MFT-2 SPOT 410	North America	Western North America	Rivera et al 2016
1.322744625	0.175147437	NA	201.0418491	6.107789052	NA	NA	NA	NA	1380.302513	NA	14.07309458	0.384170727	17.77692419	0.278050072	2.505748573	5.151283615	0.41109615	31.65530591	11.47160236	133.7094506	48.54643805	202.5464898	47.90190017	448.7606317	62.04723705	12725.60176	6.147556498	174.978001	209.8756934	NA	13MFT-7 SPOT 564	North America	Western North America	Rivera et al 2016
1.325497373	0.273286727	NA	213.4672221	5.628869158	NA	NA	NA	NA	1016.574064	NA	13.29386743	0.027209776	15.06587615	0.08603478	1.901548199	4.912024797	0.34326318	30.56549683	9.3404766	112.0887961	41.22689702	164.1745543	40.45601075	415.9746445	44.18677891	9112.2656	5.202871836	147.692293	225.4694279	NA	13MFT-1 SPOT 341	North America	Western North America	Rivera et al 2016
1.326514874	0.404089123	NA	233.6853417	7.223683944	NA	NA	NA	NA	930.5949236	NA	9.761721688	2.571708601	16.44674354	0.754191686	5.119962425	6.429688087	0.511481801	24.4846894	8.282851496	101.2148345	35.95767499	141.7415981	34.99292197	371.699505	38.69381349	8980.744104	3.557838774	106.7192137	152.8002035	NA	13MFT-1 SPOT 356	North America	Western North America	Rivera et al 2016
1.327176312	0.33345757	NA	201.9838238	6.292701615	NA	NA	NA	NA	1102.552545	NA	11.09063325	0.109294712	17.87169209	0.109875507	1.139408557	5.433915305	0.216120252	26.03853396	9.256124496	116.744663	42.10194219	173.1610672	40.24962966	427.5956074	54.69317505	12972.30715	4.726593779	144.6922786	188.3197167	NA	13MFT-6 SPOT 280	North America	Western North America	Rivera et al 2016
1.329275424	0.247319059	NA	211.5543509	5.691527066	NA	NA	NA	NA	1262.330849	NA	11.99277128	0.042588237	16.23615221	0.088717631	1.894351371	5.580370039	0.455150425	29.93023737	10.9728741	132.884195	45.41883373	190.8610783	42.56180167	424.8567633	54.34523608	10495.52729	5.151922996	170.463595	192.4507034	NA	13MFT-7 SPOT 616	North America	Western North America	Rivera et al 2016
1.331839223	0.142826301	NA	617.016752	6.84131065	NA	NA	NA	NA	6517.663353	NA	79.89170919	0.340829459	85.2854138	0.570888428	10.86283312	26.02604803	0.36363021	153.5825941	57.89342742	722.8608914	253.8800686	1009.831058	240.6488886	2475.418238	245.9866538	11056.16604	24.74385481	2273.60177	2357.229688	NA	13MFT-3 SPOT 488	North America	Western North America	Rivera et al 2016
1.335729256	0.404647652	NA	179.3531228	11.8241721	NA	NA	NA	NA	2611.773	NA	8.874209479	0.178135327	9.229670226	0.671117246	11.8918847	19.62701678	3.875452041	95.13761789	28.82236922	318.7835897	106.3962954	393.1660052	84.44775122	795.2729386	97.25667638	8489.1543	2.826040565	151.8348795	135.0515365	NA	13MFT-2 SPOT 288	North America	Western North America	Rivera et al 2016
1.339442071	0.300891213	NA	224.1759189	4.869233971	NA	NA	NA	NA	970.0933476	NA	12.08427785	3.778802964	18.9421671	1.021153363	7.127379628	4.510833835	0.292798317	24.58574176	8.900778437	107.3154928	37.32268708	152.1600319	38.68001326	396.8289888	41.58168739	8199.760379	4.538923182	136.2904231	204.3966986	NA	13MFT-4 SPOT 490	North America	Western North America	Rivera et al 2016
1.346042393	0.877124726	NA	162.2573062	5.923419243	NA	NA	NA	NA	1261.310841	NA	5.746734841	1.386721823	12.94000867	0.425591305	4.340975548	5.867369904	0.718875832	34.2544848	10.9993906	141.7421146	47.86691313	197.2127923	44.57693869	433.8288781	53.47498091	12077.86151	3.454888885	86.69592469	107.4982895	NA	13MFT-3 SPOT 422	North America	Western North America	Rivera et al 2016
1.349404823	0.440192119	NA	186.4056003	10.75595301	NA	NA	NA	NA	2332.250899	NA	5.152955137	0.168507684	8.879315326	0.582942026	10.41712969	18.32903896	2.992368324	86.61608693	26.82294044	283.6073437	91.40640337	346.5727757	75.97949847	753.0608308	78.55798537	7197.355751	2.34578323	140.5288575	148.6478317	NA	13MFT-1 SPOT 394	North America	Western North America	Rivera et al 2016
1.350327699	0.390191046	NA	169.1478664	5.15249281	NA	NA	NA	NA	902.0996382	NA	11.99804851	0.588265856	15.1225919	0.178336081	2.303286452	3.876516096	0.230928462	22.29668872	7.40640325	94.74733158	33.20866921	143.7114257	33.15547921	358.2616224	38.89355024	9353.749439	4.920675981	108.7703224	179.0227777	NA	13MFT-5 SPOT 686	North America	Western North America	Rivera et al 2016
1.352515608	0.477092468	NA	190.9227911	9.647302727	NA	NA	NA	NA	1421.048039	NA	4.435634566	0.179806491	9.248605867	0.258423358	4.636950477	9.199854991	1.020504646	41.61811243	14.20285405	166.3883648	54.78331667	219.5801166	49.70390624	512.617066	55.21963606	7981.982302	2.039874156	115.223293	139.1900407	NA	13MFT-1 SPOT 418	North America	Western North America	Rivera et al 2016
1.354305256	0.432138876	NA	221.3107348	7.859477323	NA	NA	NA	NA	901.4812249	NA	10.05231359	1.376336217	14.35084938	0.409789422	4.746375204	5.587532299	0.715270461	25.64048606	8.634704922	105.8995971	36.31684716	140.0812899	36.16358956	379.760796	34.97955087	6977.694603	3.621859324	124.4965546	182.6570511	NA	13MFT-2 SPOT 307	North America	Western North America	Rivera et al 2016
1.361305668	0.340977232	NA	387.0359896	6.651353656	NA	NA	NA	NA	1203.145098	NA	10.35844951	12.524961	45.68243139	3.066132117	17.09320216	8.369962484	0.290245194	27.75684949	10.05679253	120.661747	45.42473222	185.2200945	45.32819869	474.1655336	56.48575827	11250.51303	4.396342825	205.9594247	240.7793431	NA	13MFT-7 SPOT 505	North America	Western North America	Rivera et al 2016
1.365058978	0.420854243	NA	223.1849805	9.430172721	NA	NA	NA	NA	965.1848106	NA	9.076258537	0.982213313	14.46889309	0.258288042	2.894049931	4.814804907	0.31373647	27.90125224	8.827013622	109.221791	36.15672188	153.3288671	37.38383255	394.502449	42.01009467	10263.44344	3.721368377	110.7215799	146.5101621	NA	13MFT-3 SPOT 443	North America	Western North America	Rivera et al 2016
1.366492802	0.087072044	NA	833.1912747	5.183860377	NA	NA	NA	NA	9414.455688	NA	401.2119042	0.046853811	137.8619628	0.333524519	6.625487034	25.01992313	0.139919205	172.2218872	76.96476194	996.2793875	358.4186503	1472.102695	357.4357737	3667.689013	359.7487874	11544.00049	93.0088958	6905.759718	7289.590533	NA	13MFT-3 SPOT 493	North America	Western North America	Rivera et al 2016
1.371387861	0.379581602	NA	218.8172166	6.15904226	NA	NA	NA	NA	1188.011507	NA	15.45686739	2.025461493	19.26195996	0.480097488	3.849716794	5.804076233	0.521618243	26.01358144	10.27567629	129.9416572	46.00112891	185.200298	45.83133311	463.9220557	52.29174096	9467.929914	6.520417639	175.0110923	242.7766819	NA	13MFT-5 SPOT 689	North America	Western North America	Rivera et al 2016
1.375926844	0.235587437	NA	440.6714015	9.449147455	NA	NA	NA	NA	7742.484552	NA	40.82884667	0.73937939	64.4870328	2.154692024	41.40014289	77.07721958	13.00648841	337.5894451	101.9789712	1074.955497	329.3064311	1156.609548	244.893172	2298.613845	218.7079043	6491.908425	7.841859563	887.0082872	569.2216326	NA	13MFT-2 SPOT 339	North America	Western North America	Rivera et al 2016
1.376421563	0.324392008	NA	274.6535032	5.108526863	NA	NA	NA	NA	1348.796814	NA	17.36885212	NA	23.82068653	0.024750706	1.3783986	3.232987663	0.11376531	26.42445593	10.79241113	131.16605	51.08634382	208.9929537	53.34890528	550.0404243	62.20716184	11670.02596	7.105213289	258.0279375	355.4076454	NA	13MFT-3 SPOT 522	North America	Western North America	Rivera et al 2016
1.37935894	0.727745723	NA	180.5774718	6.793243687	NA	NA	NA	NA	1831.847688	NA	4.730290555	1.739700115	10.66891397	0.923148081	10.31575528	14.89634314	1.466033918	65.11488619	20.19187838	209.1574387	70.00925999	266.5950543	61.02548425	612.0315176	60.46271342	7536.384557	2.346966972	130.7671641	154.9313617	NA	13MFT-7 SPOT 587	North America	Western North America	Rivera et al 2016
1.380674806	0.161214409	NA	286.8751667	3.830327617	NA	NA	NA	NA	1341.177847	NA	21.59303401	0.028810604	22.34643191	0.081986802	1.253722284	3.794365177	0.11317985	26.74411655	10.34154883	137.8490193	51.28482133	212.5558984	55.14131891	590.9791758	60.53343051	10488.74112	9.808908372	315.0419794	547.3903005	NA	13MFT-1 SPOT 353	North America	Western North America	Rivera et al 2016
1.382089679	0.974043054	NA	150.591717	7.956590836	NA	NA	NA	NA	1522.529557	NA	6.26549054	NA	9.702516302	0.267826009	6.361872424	10.89397282	1.375071917	60.03118792	18.06571108	201.6594939	64.17585871	244.1205306	54.36836855	586.3983725	55.90646838	7434.662687	2.348312629	106.5726111	133.2363158	NA	13MFT-7 SPOT 513	North America	Western North America	Rivera et al 2016
1.382924964	0.614218473	NA	183.0593349	6.630719913	NA	NA	NA	NA	1056.616994	NA	10.06645848	0.319877658	13.82732337	0.492472377	3.781792814	7.768952593	0.280878905	22.96760408	9.692074085	113.876404	40.27386612	161.160268	38.56140634	401.4700738	44.32811953	9219.702505	4.398521097	121.3452994	173.1298367	NA	13MFT-7 SPOT 580	North America	Western North America	Rivera et al 2016
1.383169313	0.232833585	NA	745.5907067	5.204794771	NA	NA	NA	NA	3191.959002	NA	24.91222802	17.83644779	71.85814104	5.441977518	32.37207467	19.73680461	0.415356145	75.58140224	27.64615705	327.9900742	120.1073668	502.8868348	119.3370853	1208.725632	129.8577475	11293.77083	10.51994747	811.6987409	798.8479991	NA	13MFT-3 SPOT 521	North America	Western North America	Rivera et al 2016
1.390813823	0.500436846	NA	159.1515526	4.391684253	NA	NA	NA	NA	1190.787689	NA	9.223375219	0.458434065	11.82523375	0.12934903	2.155383638	4.078856686	0.31395278	30.0857682	10.42106289	133.4108843	48.4198828	210.6011987	47.78805103	461.7118983	60.25819545	11850.92911	4.159629277	180.3652469	221.231456	NA	13MFT-5 SPOT 636	North America	Western North America	Rivera et al 2016
1.392027926	0.082013888	NA	976.6287773	8.307480498	NA	NA	NA	NA	8614.204931	NA	160.2862757	33.17554664	114.0880157	10.33944274	59.40092625	44.82107337	0.651480943	203.4263677	71.44909214	857.7364225	295.4517171	1196.108957	286.4078645	2863.622575	288.8957253	9239.316914	39.31093808	3165.961789	4067.675957	NA	13MFT-7 SPOT 585	North America	Western North America	Rivera et al 2016
1.393082908	0.329970776	NA	190.6872148	4.977140338	NA	NA	NA	NA	1335.321943	NA	8.654312206	0.952357875	15.26334768	0.372476458	5.413174483	8.908602751	0.593459274	38.00218749	12.41832816	150.6995709	52.56427699	204.0171536	52.80280054	527.8206149	51.65470723	8873.769092	3.501815821	145.3553977	188.5573084	NA	13MFT-6 SPOT 314	North America	Western North America	Rivera et al 2016
1.393127866	0.645758648	NA	256.6023074	13.6756304	NA	NA	NA	NA	1762.729808	NA	7.457290614	2.508372451	14.76249209	1.045874095	9.323432046	11.58967483	1.141460538	52.59575955	15.88762829	200.3037364	65.52854855	270.7377517	58.3620133	638.4428673	67.48743373	9062.225318	3.79081171	153.3711686	181.6681239	NA	13MFT-3 SPOT 507	North America	Western North America	Rivera et al 2016
1.393548101	0.566300677	NA	337.813497	5.899162494	NA	NA	NA	NA	926.3384984	NA	10.18850949	10.63841277	32.02478001	2.622142985	15.70391711	8.128161213	0.644643044	26.65563766	8.545238143	95.34585737	35.74208874	147.1767348	34.78581538	374.6200248	39.93167459	8102.166552	4.571396036	120.0855592	183.5044404	NA	13MFT-1 SPOT 348	North America	Western North America	Rivera et al 2016
1.394277307	0.498728876	NA	277.1309845	5.920049752	NA	NA	NA	NA	1431.414395	NA	14.24739706	NA	24.68125454	0.10186087	2.644832059	5.114550406	0.23370175	32.51861893	12.80623179	158.5387645	54.12293312	232.5549919	56.3220569	604.5692069	63.63245457	10336.53173	6.148722456	279.9109672	382.5691482	NA	13MFT-6 SPOT 308	North America	Western North America	Rivera et al 2016
1.3967446	0.803900869	NA	184.9428181	6.380355114	NA	NA	NA	NA	896.2218025	NA	10.36836729	0.027084732	15.63527568	0.080522925	2.407148962	3.92658651	0.323347853	24.24108868	8.554193137	98.65452295	34.0040153	142.2759648	34.40284959	367.8389165	37.56750689	8901.970369	4.772474651	128.7832609	221.4313721	NA	13MFT-5 SPOT 666	North America	Western North America	Rivera et al 2016
1.397190654	0.659950182	NA	192.5941854	10.93897005	NA	NA	NA	NA	2147.798918	NA	6.840439797	0.09153272	9.17230466	0.499456599	9.754177448	19.67315063	2.401287266	86.92835031	25.91766131	272.9513193	88.64238147	331.4525928	75.50605863	783.2258952	76.00789684	7240.971711	2.387130812	149.0256508	158.2764584	NA	13MFT-7 SPOT 514	North America	Western North America	Rivera et al 2016
1.399482342	0.257595653	NA	211.2212013	3.829203269	NA	NA	NA	NA	1387.797512	NA	17.72763203	0.00826944	16.94305075	0.048523125	2.025500538	4.058624329	0.057269803	30.8112018	10.72240157	140.2196433	51.92844993	220.6509901	50.61774875	506.5970591	69.22442359	12612.19594	7.555885849	230.1812121	328.2791347	NA	13MFT-5 SPOT 699	North America	Western North America	Rivera et al 2016
1.399800713	0.590514381	NA	161.0061969	10.26839196	NA	NA	NA	NA	1676.481201	NA	3.50670772	1.982883147	9.60637537	0.977244337	11.77614233	14.88213029	3.274246421	62.54451918	20.06601843	210.7638247	67.57225602	248.3516186	55.98066961	571.439325	55.65851221	6806.508815	1.64610998	71.14208325	94.38522907	NA	13MFT-1 SPOT 347	North America	Western North America	Rivera et al 2016
1.401389817	0.416025161	NA	170.8704814	6.055443301	NA	NA	NA	NA	2091.202477	NA	6.958546632	0.10429879	14.92548637	0.178675898	4.814342337	10.81795494	0.881578678	58.37094394	20.07538608	225.9995463	81.50933771	331.3549833	69.50711028	672.0009483	83.81013401	11443.59527	3.646146398	196.4955395	201.7788066	NA	13MFT-7 SPOT 604	North America	Western North America	Rivera et al 2016
1.402216656	0.485159719	NA	172.2727333	4.291139502	NA	NA	NA	NA	722.1129511	NA	11.28983035	0.149890795	12.33884561	0.030019638	1.306960897	2.919894464	0.219104685	17.70037197	6.542598003	81.12471634	29.41938106	117.2800812	29.15919958	326.3793027	30.76880975	8316.348251	4.33251781	97.17638515	168.5700093	NA	13MFT-2 SPOT 333	North America	Western North America	Rivera et al 2016
1.402319581	0.188909366	NA	206.108511	5.348460323	NA	NA	NA	NA	799.778282	NA	9.956271531	1.806361122	16.69480785	0.521786894	4.990011038	3.614919635	0.198729283	18.02361102	7.09505082	84.66685803	30.8032743	126.9374559	31.08377098	324.8974081	35.75637932	8906.64367	4.887887884	101.6076141	179.8932949	NA	13MFT-1 SPOT 433	North America	Western North America	Rivera et al 2016
1.402578368	0.577244176	NA	193.8540253	5.281287155	NA	NA	NA	NA	886.1401656	NA	10.94640326	1.505156844	16.01993685	0.470489645	3.04342913	4.348193682	0.263828541	21.79365498	7.913976683	99.3105617	34.47497513	137.7242306	32.96629342	345.2724465	37.6553221	10232.70688	4.544703537	116.6871757	166.9842732	NA	13MFT-2 SPOT 388	North America	Western North America	Rivera et al 2016
1.404592944	0.536170017	NA	169.5129511	4.261675365	NA	NA	NA	NA	1137.40677	NA	11.80697597	0.019160601	12.16937546	0.059083788	1.200019974	3.938707027	0.244859252	23.22552824	10.17553377	116.1878009	41.92498269	177.1123867	43.33669052	436.8587121	53.85292201	11629.74397	5.490752545	108.342464	165.0636615	NA	13MFT-7 SPOT 573	North America	Western North America	Rivera et al 2016
1.408901628	0.434432158	NA	178.6115749	6.498912116	NA	NA	NA	NA	1265.948693	NA	14.11633766	0.244393303	17.2040774	0.122393115	1.880164065	6.097902815	0.478314721	32.94514148	10.72505107	138.4219558	50.93885786	210.8262534	46.72548774	471.5158317	56.50491134	10933.86974	6.383902053	157.9187667	198.869026	NA	13MFT-7 SPOT 602	North America	Western North America	Rivera et al 2016
1.411303538	0.355401274	NA	155.5978575	6.601126503	NA	NA	NA	NA	1536.150118	NA	6.5370706	0.104740721	10.17616055	0.252496404	5.023724908	10.29692353	1.516684226	51.58096979	17.11704276	185.9328905	59.96351296	220.2512842	51.82314097	511.1810599	50.81450036	7582.238713	2.258528784	108.9485726	128.2659255	NA	13MFT-7 SPOT 584	North America	Western North America	Rivera et al 2016
1.413839728	0.534534417	NA	281.6834845	5.279646648	NA	NA	NA	NA	1029.324566	NA	11.82882975	4.639194317	20.86388053	0.936701506	5.861635108	5.944475537	0.392138384	28.12979285	9.472416854	109.4446643	39.04801079	156.3260312	41.98036113	406.3825494	43.15791806	8978.796364	5.528025024	133.7610187	200.9900727	NA	13MFT-3 SPOT 530	North America	Western North America	Rivera et al 2016
1.413955987	0.348087676	NA	269.6801781	12.70087277	NA	NA	NA	NA	1427.369749	NA	3.502445995	NA	12.6082544	0.273179791	6.024671674	8.93224483	1.485430458	42.65609074	14.77418503	166.4077424	52.94352537	214.1399583	51.2176301	523.3245176	54.59413139	7646.203188	1.516751514	120.1493212	134.064608	NA	13MFT-4 SPOT 497	North America	Western North America	Rivera et al 2016
1.414029231	0.635690006	NA	193.136156	9.853294294	NA	NA	NA	NA	1641.327617	NA	4.269234245	2.214672859	9.948026495	0.93562483	10.11547639	14.18594725	2.668291708	59.50076119	18.00808596	198.0286168	61.2475385	234.3049805	54.5834724	531.058202	54.51167622	6815.032253	1.731489438	77.03283371	90.77061473	NA	13MFT-6 SPOT 311	North America	Western North America	Rivera et al 2016
1.418437677	0.430972331	NA	202.3785586	5.959340912	NA	NA	NA	NA	1040.257187	NA	12.78376922	NA	14.9181636	0.06608502	1.452731843	4.748260079	0.281744974	25.02761304	9.413385213	114.4123556	40.41421188	166.0246002	40.16865246	413.3693021	43.00474497	9783.573799	5.521598493	136.1059033	200.449299	NA	13MFT-3 SPOT 527	North America	Western North America	Rivera et al 2016
1.418978961	0.253590587	NA	251.4230807	5.270268375	NA	NA	NA	NA	1418.231762	NA	25.19563421	0.057067776	24.40971353	0.036270686	1.280923778	3.740120381	0.080691807	27.17633296	11.54072357	151.3541017	54.10845035	232.7190429	57.35835722	598.0839424	64.39694899	11150.60843	9.301148775	368.2459345	541.8125524	NA	13MFT-3 SPOT 489	North America	Western North America	Rivera et al 2016
1.421365239	0.282390198	NA	258.5401671	15.32195868	NA	NA	NA	NA	5422.799841	NA	11.71427031	0.486933228	12.72386743	1.358406491	28.30942341	51.11780281	11.14403327	217.4211809	63.37152024	652.3186518	208.3608871	757.0266653	156.2863187	1441.215193	162.5940121	7405.73301	2.972006568	312.9047895	214.4116498	NA	13MFT-7 SPOT 576	North America	Western North America	Rivera et al 2016
1.422402192	0.191678578	NA	443.7456157	5.543024257	NA	NA	NA	NA	3096.585552	NA	31.13613475	5.212403794	49.55807804	1.741509668	11.44785845	12.30639128	0.262474297	61.85810577	25.14671151	311.3681409	115.9424616	483.011438	111.2413007	1058.316448	130.0900954	12309.05156	12.48353439	754.5720855	755.2872899	NA	13MFT-5 SPOT 623	North America	Western North America	Rivera et al 2016
1.427022877	0.465802285	NA	185.2338182	6.521176422	NA	NA	NA	NA	792.572686	NA	9.969391927	0.057942063	13.80609341	0.08253309	0.946833182	2.956902427	0.259797876	17.91771513	6.394486116	79.32435804	28.93143367	123.3308868	30.77467884	334.8273126	36.31950257	10535.74196	4.478181856	92.56491346	153.5750365	NA	13MFT-2 SPOT 324	North America	Western North America	Rivera et al 2016
1.428531726	0.385270324	NA	271.9852028	11.54113849	NA	NA	NA	NA	1834.121246	NA	20.40633469	0.142516373	25.31753371	0.332041455	5.910880609	13.23404717	1.459677196	59.12797581	19.26805803	223.6467869	74.25509683	281.650898	68.83639999	677.2718022	64.47853684	7010.016409	6.774656812	517.2365771	314.3286745	NA	13MFT-2 SPOT 317	North America	Western North America	Rivera et al 2016
1.429274707	0.283891789	NA	199.5162484	5.071830304	NA	NA	NA	NA	1125.547467	NA	13.07513688	0.023096548	14.54871553	0.051157411	1.558791944	4.413439925	0.173532382	24.43212033	8.812684832	109.8596966	41.00255118	177.5993891	41.31277405	421.0226319	54.82004243	12306.2344	5.688459903	156.5400525	222.4809892	NA	13MFT-7 SPOT 605	North America	Western North America	Rivera et al 2016
1.431422743	0.320956352	NA	170.6452385	6.15126661	NA	NA	NA	NA	964.4912239	NA	11.85848963	0.547024943	13.34916819	0.114441969	2.092922587	2.879899363	0.262059243	20.20702647	7.785490698	101.799609	36.04891132	152.4433718	36.25952415	350.6999163	45.01492825	10819.47396	4.978394989	113.2275418	153.9301914	NA	13MFT-5 SPOT 624	North America	Western North America	Rivera et al 2016
1.431777021	0.396730662	NA	206.5094798	11.20465404	NA	NA	NA	NA	1651.751556	NA	6.083718169	1.372894793	12.63105961	0.731417596	7.140774256	10.36636891	1.170724386	53.22480627	16.2080487	195.4899976	64.39897266	251.9533204	52.06339728	536.7555323	65.38542011	10156.77667	2.741381454	124.8032185	139.9664928	NA	13MFT-5 SPOT 646	North America	Western North America	Rivera et al 2016
1.432048807	0.34261042	NA	185.4965348	5.541306737	NA	NA	NA	NA	858.5942416	NA	11.17118919	0.03302934	13.93584701	0.07428125	1.411445417	5.165532874	0.340961481	22.81725175	7.657980173	97.092071	34.95187234	139.3390059	35.22416976	382.1289198	34.69737467	7911.499109	4.407899927	118.6545414	189.2817378	NA	13MFT-3 SPOT 461	North America	Western North America	Rivera et al 2016
1.438749618	0.465926383	NA	157.1121092	7.767292558	NA	NA	NA	NA	1872.17211	NA	5.215262783	0.771089289	11.03744086	0.500941158	8.043908048	16.34843382	2.346530144	71.25877569	20.80834637	232.673936	72.14769828	287.1645177	64.14841335	635.828365	60.76402007	7128.096684	2.259290111	130.3822871	149.2882466	NA	13MFT-6 SPOT 295	North America	Western North America	Rivera et al 2016
1.452210769	0.596046859	NA	200.7255026	12.35164156	NA	NA	NA	NA	2882.781765	NA	5.664529528	0.058201752	8.399764321	0.666204087	12.73717214	28.51807305	4.345187088	116.1018556	33.96109069	374.4879604	116.1777525	423.4739224	92.50226328	868.2702389	96.73922248	8859.464671	2.204627208	144.0144348	118.3075955	NA	13MFT-3 SPOT 438	North America	Western North America	Rivera et al 2016
1.455818389	0.34827868	NA	168.930851	5.267179349	NA	NA	NA	NA	889.971918	NA	12.5284921	0.14199132	14.45249162	0.098922402	1.532861248	4.080827858	0.258589027	21.92398422	7.633931044	94.58635961	34.13707045	138.7058223	33.20383913	357.1868809	37.4543007	9022.262709	5.593353546	124.6708951	202.2295066	NA	13MFT-6 SPOT 318	North America	Western North America	Rivera et al 2016
1.455888276	0.22770615	NA	435.1194256	9.684058203	NA	NA	NA	NA	2876.896438	NA	23.52815238	0.121786695	52.69165526	0.52645215	8.665659667	17.06598712	1.090775143	80.00707194	27.79661276	321.5278287	108.7711488	420.172044	98.9927988	990.8235901	115.0974722	8123.936715	6.418041417	1173.918169	667.5400317	NA	13MFT-7 SPOT 552	North America	Western North America	Rivera et al 2016
1.456846408	0.261241383	NA	379.3824894	9.194785368	NA	NA	NA	NA	6170.20746	NA	32.76776892	0.351494585	49.80202496	1.541264494	31.66489863	59.57441306	7.131354376	255.8143634	79.42827521	880.2110232	264.6516872	922.3367585	203.3197246	2037.259603	178.4639822	6372.792734	7.458192517	681.8436467	544.972206	NA	13MFT-2 SPOT 302	North America	Western North America	Rivera et al 2016
1.462290148	0.219423457	NA	206.0113519	6.003031378	NA	NA	NA	NA	1367.047641	NA	15.6640479	0.144438457	18.23752375	0.124304522	3.083380912	5.480350157	0.570036813	34.18555814	12.0012113	143.5928323	53.31431587	211.8493284	49.8125076	492.2994102	61.12643179	11654.69132	6.439443383	188.46207	221.8460776	NA	13MFT-5 SPOT 639	North America	Western North America	Rivera et al 2016
1.463840529	0.50186219	NA	295.0045166	5.177240591	NA	NA	NA	NA	886.1724811	NA	10.12031259	3.181622064	18.57156071	0.663574392	6.304410876	5.246818416	0.288283609	22.03120562	8.879586952	104.1713917	33.40944844	133.9923656	33.58691107	397.9244747	38.41625384	7292.47772	4.545113586	134.4675432	227.4697646	NA	13MFT-3 SPOT 476	North America	Western North America	Rivera et al 2016
1.466987095	0.334074859	NA	209.747855	13.62507582	NA	NA	NA	NA	3066.073818	NA	8.479551084	0.323952739	9.011251191	0.740295621	17.59796698	31.06622909	7.421982741	125.5353256	37.59500479	393.2952089	122.9203884	441.9323545	98.33001205	987.7023278	96.31319286	5776.529916	2.451876027	163.598086	165.1274769	NA	13MFT-1 SPOT 349	North America	Western North America	Rivera et al 2016
1.470446744	0.605853707	NA	169.9153651	9.124073967	NA	NA	NA	NA	1544.551921	NA	6.194077609	NA	7.417355542	0.237455893	6.68565833	13.39705594	1.814292987	59.79138357	18.24084758	205.901809	64.24811456	238.8416589	53.39996935	549.6823809	53.39018707	7365.974928	2.34180417	101.3995152	112.7337252	NA	13MFT-2 SPOT 299	North America	Western North America	Rivera et al 2016
1.475146752	0.418068037	NA	235.9601644	5.896623836	NA	NA	NA	NA	947.0219895	NA	11.10256849	1.335093867	17.60179362	0.478745437	3.76616925	4.819951355	0.183181624	24.57504188	8.620635141	110.363695	40.18965348	153.9823808	37.28041116	423.2057656	41.62870698	9291.585943	4.858140855	134.625422	235.5554371	NA	13MFT-5 SPOT 656	North America	Western North America	Rivera et al 2016
1.476024332	0.300514651	NA	245.3900775	9.708345414	NA	NA	NA	NA	1120.992136	NA	7.921581218	4.75747904	18.77289093	1.48042587	10.59697828	7.379391933	0.609425675	32.25857171	10.86242727	122.4312057	41.88011803	177.2016051	40.7176076	400.0774533	48.15878682	10123.4748	3.752404741	133.6300674	157.8768867	NA	13MFT-4 SPOT 448	North America	Western North America	Rivera et al 2016
1.478548727	0.230686878	NA	236.0455945	15.22712887	NA	NA	NA	NA	4743.699837	NA	9.458976695	0.156279067	12.4145766	1.20922064	22.95450797	43.21222499	9.603078804	181.8557702	54.60748715	575.3283149	182.3601762	666.570634	141.5614536	1317.890669	148.8669685	7256.293077	2.727719868	255.6787123	183.3159021	NA	13MFT-7 SPOT 577	North America	Western North America	Rivera et al 2016
1.481182393	0.408806421	NA	174.8907253	12.93689098	NA	NA	NA	NA	2302.743329	NA	4.411436066	0.248467321	7.282648983	0.563978687	8.450688311	16.3661216	4.022070371	80.03399552	24.81196709	282.3901733	92.10703356	344.2808809	73.15982334	669.3944826	85.17565772	9255.221143	2.088350017	121.8690852	118.2426557	NA	13MFT-4 SPOT 452	North America	Western North America	Rivera et al 2016
1.483360975	0.55140302	NA	202.7138056	13.04958215	NA	NA	NA	NA	2500.903031	NA	6.258190104	0.387425722	8.072337683	0.834810128	13.81876834	24.57390292	5.165290527	105.0558451	31.32242095	330.4733589	104.9391295	371.1425746	84.43604393	839.8453806	84.68836487	7031.185551	2.356972861	133.285408	129.6287903	NA	13MFT-3 SPOT 455	North America	Western North America	Rivera et al 2016
1.496722757	0.358963107	NA	311.2319998	13.48600352	NA	NA	NA	NA	2875.892702	NA	5.35105283	5.060987592	15.1628935	1.968140984	17.21430277	28.18502131	6.609139384	110.8842011	33.85176977	363.4340933	113.4120621	415.4633514	90.05466542	879.0492943	95.88273456	7325.584628	2.118704464	125.9962841	130.4517775	NA	13MFT-5 SPOT 649	North America	Western North America	Rivera et al 2016
1.508632571	0.759694352	NA	175.9979094	12.27678806	NA	NA	NA	NA	909.4480564	NA	5.279953259	0.036805125	7.767839242	0.133737586	3.168960006	4.495127288	1.279900351	32.19778148	8.715538823	105.6819173	36.43394001	145.3167885	33.21051152	363.2754229	37.811318	6871.14569	3.165230552	100.5840082	128.8074755	NA	13MFT-5 SPOT 669	North America	Western North America	Rivera et al 2016
1.508649099	0.194821888	NA	298.8611921	5.099500823	NA	NA	NA	NA	1579.643841	NA	15.30038941	0.048598085	24.89886358	0.102197749	2.292325074	6.17036175	0.259817266	38.43043115	13.07855711	168.7367289	60.62569177	257.0927521	60.28587421	606.7513714	76.65142567	11952.12775	6.446161526	341.5900407	369.5295372	NA	13MFT-4 SPOT 464	North America	Western North America	Rivera et al 2016
1.510257262	0.352658445	NA	203.3863895	8.733735499	NA	NA	NA	NA	1200.204505	NA	8.701399092	0.701917758	11.32682705	0.362387119	3.679323765	6.124522821	0.813700847	29.69446289	10.76325296	126.2042758	45.34700055	177.4615127	40.25541238	406.5097931	49.44127603	9108.973208	3.453688539	134.1835812	144.843279	NA	13MFT-7 SPOT 555	North America	Western North America	Rivera et al 2016
1.51187331	0.31740549	NA	287.5042585	5.323127454	NA	NA	NA	NA	1044.544826	NA	13.78257503	8.412609396	28.71360488	2.408282086	14.70110624	7.792054848	0.27376838	27.56502483	8.857425862	114.7549307	41.12679324	163.613747	38.67963907	396.5555836	45.08016236	10300.28588	6.121422597	143.8353902	196.7618562	NA	13MFT-7 SPOT 578	North America	Western North America	Rivera et al 2016
1.512198398	0.535412268	NA	149.7755956	13.24029659	NA	NA	NA	NA	2272.683291	NA	3.146082653	0.230071368	4.751810423	0.577083886	11.07005486	19.41312449	4.969424353	84.22392707	26.83176237	276.8711621	88.28288159	331.3626551	69.60437226	635.7594326	80.22885	8926.749153	1.259418073	79.00452959	74.50039994	NA	13MFT-7 SPOT 611	North America	Western North America	Rivera et al 2016
1.512347151	0.575602555	NA	155.5657397	10.36126557	NA	NA	NA	NA	1959.531442	NA	4.881266427	0.197739185	8.191809426	0.363753091	5.213189867	10.35289554	2.189115287	63.28263564	20.56835202	220.0823449	72.41732932	282.871239	60.39086582	567.4249101	76.01465985	10569.27959	1.993358006	102.3140504	95.55215214	NA	13MFT-7 SPOT 563	North America	Western North America	Rivera et al 2016
1.513995627	0.466792043	NA	251.6959818	7.704675531	NA	NA	NA	NA	1743.876114	NA	4.949755358	3.468355771	17.1717725	1.381437693	10.09704049	14.92160398	1.651457521	58.72825167	19.137871	210.8943124	70.60600109	261.2751281	57.90684962	601.1329022	62.36670897	7811.29404	2.401898362	129.343309	149.125583	NA	13MFT-7 SPOT 527	North America	Western North America	Rivera et al 2016
1.525120142	0.320131023	NA	176.1860243	9.003192254	NA	NA	NA	NA	1776.090427	NA	7.772213558	0.858571145	14.37858983	0.330846717	4.559727499	9.633557216	1.024109929	51.81671567	16.47612065	194.948987	66.5253948	262.4199143	58.05535293	554.1219162	67.68371682	10496.00968	3.2905273	160.200629	154.7944829	NA	13MFT-5 SPOT 694	North America	Western North America	Rivera et al 2016
1.526126668	0.460455941	NA	179.0900214	6.243963638	NA	NA	NA	NA	611.6412401	NA	7.199853567	0.027711143	12.38823921	NA	1.605173315	2.518839809	0.075668649	12.35903591	4.788881484	62.34343688	23.60450446	98.10861775	24.26535515	274.3281274	28.56480631	9757.619508	3.227484504	71.56129859	133.6895063	NA	13MFT-7 SPOT 546	North America	Western North America	Rivera et al 2016
1.526437896	0.439738647	NA	206.7783391	8.111402434	NA	NA	NA	NA	1044.000416	NA	10.39708108	1.671673469	16.16347405	0.651653294	3.473304166	4.994246655	0.583485568	25.70459462	9.425331343	111.2720976	41.585916	163.1558435	37.93767883	374.9979218	47.39344257	10963.24888	4.67933917	118.0447633	142.7901907	NA	13MFT-2 SPOT 329	North America	Western North America	Rivera et al 2016
1.532225254	0.558015418	NA	194.0477446	8.226746625	NA	NA	NA	NA	880.7412116	NA	10.17044015	0.140822078	13.86899689	0.128617432	1.826758965	4.1373984	0.46076116	25.43345863	8.317201639	96.83771745	36.33798307	141.0349875	35.28926497	387.2336199	37.88175865	8341.743855	4.783635487	120.3232856	180.4805822	NA	13MFT-3 SPOT 492	North America	Western North America	Rivera et al 2016
1.532604747	0.654350392	NA	189.0748524	6.029995252	NA	NA	NA	NA	762.2500061	NA	8.866445553	2.38265095	16.72186102	0.589969039	5.458964254	4.70843772	0.252431796	24.00327042	7.252106065	86.65822291	30.02038546	122.7483875	29.4320694	327.2610524	31.38427508	8363.79498	3.650345158	89.37505227	153.1217403	NA	13MFT-2 SPOT 371	North America	Western North America	Rivera et al 2016
1.535813437	0.340256734	NA	296.8940528	10.90194176	NA	NA	NA	NA	3261.640331	NA	10.68347669	3.655778306	19.29114314	1.696003319	19.05513805	31.25378795	4.982725762	128.4818077	40.22552934	416.4391455	129.8071311	488.8386996	106.4590528	1056.404356	103.9628824	6316.110339	3.169776018	227.8871773	209.4038216	NA	13MFT-7 SPOT 540	North America	Western North America	Rivera et al 2016
1.536743829	0.278708518	NA	241.182354	6.912361749	NA	NA	NA	NA	1760.430869	NA	8.844475059	0.122486744	17.76901671	0.354306341	5.81021078	12.86765545	0.661842167	56.91091164	18.43123624	214.1024077	73.97899223	286.2612048	65.92327537	687.6071087	73.35370988	9040.027925	3.90783735	224.5697584	280.630287	NA	13MFT-4 SPOT 481	North America	Western North America	Rivera et al 2016
1.541762057	0.654134847	NA	189.5055797	9.622617087	NA	NA	NA	NA	881.4621115	NA	8.686265809	0.582172714	10.7964266	0.258919215	3.77498323	4.541216453	0.463610208	24.23155431	8.601353235	100.5416354	34.35913484	142.9262736	34.74391751	358.736353	39.09181479	9319.937737	4.050941695	92.5299791	156.2412373	NA	13MFT-3 SPOT 450	North America	Western North America	Rivera et al 2016
1.542192081	0.611795418	NA	290.9206786	5.452643513	NA	NA	NA	NA	1082.927414	NA	10.90706493	7.055860654	25.03139251	1.606827759	12.08628635	7.069472185	0.366404697	30.09492707	9.218908545	115.5552579	40.73648876	167.7629512	39.23745627	395.5288098	49.56126122	10744.32675	4.821841154	137.9231065	166.194255	NA	13MFT-3 SPOT 423	North America	Western North America	Rivera et al 2016
1.546132199	0.334134737	NA	207.7033286	7.832348044	NA	NA	NA	NA	1956.71336	NA	4.987576795	1.047464745	10.94338126	0.56867974	9.655568298	15.45060269	2.354157376	68.24711404	21.80396482	238.9472271	79.30468114	297.8169591	64.99881867	651.4196531	66.03932302	7593.169772	2.222891771	126.0031506	144.3487284	NA	13MFT-1 SPOT 419	North America	Western North America	Rivera et al 2016
1.546871966	0.354585723	NA	161.8715962	5.42354416	NA	NA	NA	NA	773.8541858	NA	9.389735774	NA	11.33320991	0.0307773	0.91327902	3.458151427	0.272541634	17.76999628	6.66239761	85.07789417	29.52888999	116.837679	29.07077386	324.7867735	33.77251791	8404.38754	4.245307672	80.01984036	143.7811683	NA	13MFT-7 SPOT 536	North America	Western North America	Rivera et al 2016
1.550767913	0.686401775	NA	187.0157338	13.03306376	NA	NA	NA	NA	2083.749517	NA	3.971980051	0.349209293	7.387132367	0.638099593	9.111945125	17.13692558	3.493518201	79.98997835	25.30318867	264.190833	83.47472542	306.841796	70.13694198	709.7834221	70.43618027	7208.99246	1.813000188	113.1319984	133.8499145	NA	13MFT-3 SPOT 457	North America	Western North America	Rivera et al 2016
1.55172016	0.296975582	NA	397.9287521	12.0687846	NA	NA	NA	NA	2403.445778	NA	5.367583092	8.509351814	21.43262315	2.515608799	22.84021525	24.25590101	3.384888005	92.41811767	29.6681121	299.1009928	96.37939293	350.7322335	74.87553595	782.1189569	76.80471812	6886.815581	2.355618308	128.7745547	146.6050662	NA	13MFT-2 SPOT 403	North America	Western North America	Rivera et al 2016
1.556386382	0.706374003	NA	381.263751	6.572277357	NA	NA	NA	NA	837.9394442	NA	8.942285949	10.22013879	30.13422653	2.854402222	14.74465793	5.774088371	0.334653291	23.57778857	7.271610898	91.68520271	32.10366618	134.0706812	29.82890671	288.9162921	38.35440349	10122.49519	3.69498889	89.58276834	110.1377038	NA	13MFT-5 SPOT 642	North America	Western North America	Rivera et al 2016
1.560072346	0.483633851	NA	195.4080271	5.780069071	NA	NA	NA	NA	996.0088945	NA	12.41612812	0.314749341	15.03060022	0.13606169	2.356087425	5.969026918	0.502837102	25.17370724	9.396279877	116.1358367	38.54359829	151.980843	36.73271966	391.855325	42.07374617	8613.703336	4.68896692	137.5012769	201.2026179	NA	13MFT-6 SPOT 292	North America	Western North America	Rivera et al 2016
1.561585126	0.552363019	NA	213.3469885	5.957559289	NA	NA	NA	NA	1255.601183	NA	6.316693705	0.684674693	10.94724652	0.450390739	4.322242694	7.989862659	0.945645639	42.79106393	12.79791041	151.7035766	48.64432422	189.2487973	44.385677	436.9287174	47.57820162	8828.099888	2.977015861	101.8847589	116.92256	NA	13MFT-3 SPOT 447	North America	Western North America	Rivera et al 2016
1.56446019	0.468316716	NA	238.9152497	14.46522052	NA	NA	NA	NA	3553.864271	NA	10.03587054	0.116523405	9.066372569	0.920461134	18.22754562	36.0533402	9.143895419	147.0064358	43.92672751	462.836518	145.5501957	541.1954305	117.0486531	1170.873064	115.6773562	5848.371161	2.918011875	167.2227316	173.8337904	NA	13MFT-7 SPOT 519	North America	Western North America	Rivera et al 2016
1.566040469	0.436601918	NA	208.6438468	11.14123617	NA	NA	NA	NA	3466.517712	NA	6.544771582	2.501272486	13.58911522	1.28131974	15.22700199	27.45309981	4.300729176	120.6977825	37.17316604	408.6527019	133.1174418	507.31185	105.3418647	980.7900299	117.5204589	8661.194421	2.883520317	188.9667902	162.9525266	NA	13MFT-7 SPOT 599	North America	Western North America	Rivera et al 2016
1.566536476	0.451548252	NA	278.4033744	13.48044103	NA	NA	NA	NA	2866.735723	NA	8.118166631	4.107387817	13.56051868	1.565957914	17.80989226	28.24057922	7.120857934	118.4419213	36.12114276	377.7053808	120.9400826	425.1810858	93.4620006	937.3629812	91.78765857	6253.713741	2.620316168	147.0002627	150.7715181	NA	13MFT-7 SPOT 518	North America	Western North America	Rivera et al 2016
1.570812833	0.996360607	NA	204.9426307	6.197512041	NA	NA	NA	NA	1174.103291	NA	14.79797307	NA	17.51850992	0.068648797	2.371674733	5.962442453	0.364624651	32.51371519	10.46891942	132.1286589	46.81721993	186.402292	47.74571733	514.2408364	49.68638194	10368.79043	7.534474469	175.5407836	247.7395234	NA	13MFT-3 SPOT 445	North America	Western North America	Rivera et al 2016
1.579687906	0.659189863	NA	116.3612713	7.74635643	NA	NA	NA	NA	1174.786107	NA	3.556052495	0.10283672	5.813499185	0.151041306	3.875382705	7.010074408	1.160693991	36.93418485	11.75518574	139.6194847	46.90697638	181.0144659	40.30979021	384.0249553	47.91614097	9652.778278	1.961365367	56.92067006	64.8177316	NA	13MFT-6 SPOT 266	North America	Western North America	Rivera et al 2016
1.58243157	0.274404748	NA	248.8193487	5.665486614	NA	NA	NA	NA	1451.084789	NA	27.28177963	2.761828251	22.48275895	0.36733794	3.18811127	4.063384393	0.077146183	27.18368481	10.77149913	148.0025477	52.54122279	236.2246358	58.43042103	619.516656	67.97706681	11624.46542	12.61401824	294.5541262	540.5727715	NA	13MFT-3 SPOT 524	North America	Western North America	Rivera et al 2016
1.583510909	1.008851212	NA	235.4112093	7.691251356	NA	NA	NA	NA	1971.286755	NA	5.400313345	3.772558341	16.74963843	1.082411826	10.4003961	17.4761498	2.09635299	70.5832218	21.99073498	233.5006667	75.86734913	293.9600264	65.02371241	635.0606726	64.36056567	8542.215848	2.593849342	127.2283737	142.5982611	NA	13MFT-3 SPOT 509	North America	Western North America	Rivera et al 2016
1.584775059	0.510965834	NA	183.3682131	7.137963479	NA	NA	NA	NA	1087.342722	NA	10.30555175	NA	13.37684592	0.029022395	1.838217428	5.60674738	0.47554595	27.707273	9.96391397	115.5407139	41.85520478	165.4930509	39.19986647	397.8731186	45.32905411	10174.0433	4.537440061	145.9350471	162.4466793	NA	13MFT-3 SPOT 442	North America	Western North America	Rivera et al 2016
1.589140453	0.420255378	NA	203.3946131	15.50136554	NA	NA	NA	NA	2455.992781	NA	4.03465925	2.493822613	9.007508623	1.105737474	14.7004268	20.48022141	4.816389917	93.7593281	27.08404994	306.1547559	98.3535568	364.9725406	79.85087783	734.5247247	90.35567574	8095.679607	1.825491884	102.7341227	92.4532337	NA	13MFT-4 SPOT 470	North America	Western North America	Rivera et al 2016
1.592019561	0.49617414	NA	145.6930302	7.280817595	NA	NA	NA	NA	1441.368253	NA	4.770986725	0.036707578	9.378712156	0.216164883	4.015351773	9.018417661	1.340636586	47.38407344	15.38876347	181.4993624	57.93624558	212.2871197	49.092375	487.5667167	53.08635954	8907.378616	2.167684193	87.89551081	112.8315431	NA	13MFT-7 SPOT 506	North America	Western North America	Rivera et al 2016
1.597538363	0.675508961	NA	187.8134453	8.129820209	NA	NA	NA	NA	818.066716	NA	7.015282668	0.104351777	10.38852737	0.110155954	1.600721143	3.166831037	0.453781477	18.60149308	7.401401649	89.48365473	31.22161032	134.4871644	31.32610532	348.0529888	35.89528201	8092.300047	3.218836743	85.10821609	140.4835141	NA	13MFT-2 SPOT 373	North America	Western North America	Rivera et al 2016
1.602367932	0.349616843	NA	356.7758456	6.67953925	NA	NA	NA	NA	1486.643331	NA	7.750285789	3.837336408	31.03572689	0.953327069	8.124297973	9.944961526	0.453323213	37.56070709	13.17058437	160.1797089	55.39667281	228.4275063	53.89254143	574.5367188	62.34911292	9315.35235	3.913247452	244.7317506	286.6597708	NA	13MFT-7 SPOT 547	North America	Western North America	Rivera et al 2016
1.607254168	0.363911827	NA	349.8714489	9.710292175	NA	NA	NA	NA	4478.141278	NA	26.80481622	0.444222611	25.97505895	1.049666396	18.17407463	38.05140737	4.411575015	177.3559409	56.7840185	601.1665725	186.4677366	701.2559433	153.9061514	1518.270923	147.9258101	6674.018863	7.243839062	436.2095038	381.218602	NA	13MFT-2 SPOT 374	North America	Western North America	Rivera et al 2016
1.607895402	0.555202086	NA	160.8701849	5.89989197	NA	NA	NA	NA	877.3760875	NA	10.85434153	0.33548815	13.6121491	0.221128779	2.139062719	4.278160467	0.468966875	22.95366978	8.11120535	95.54364194	32.8252717	135.471696	32.75439961	346.7376584	36.4020807	9218.266895	3.928144754	102.6991628	170.9224797	NA	13MFT-1 SPOT 374	North America	Western North America	Rivera et al 2016
1.610961613	0.492277726	NA	178.8387328	10.55117606	NA	NA	NA	NA	3034.944657	NA	7.687937024	NA	9.31601025	0.567629383	12.73190132	25.4978254	4.527679116	120.5622823	36.08981909	385.9305431	122.9182405	448.2140869	95.13226583	899.6410146	106.4743169	8312.540031	2.702080687	172.6246331	135.994245	NA	13MFT-2 SPOT 283	North America	Western North America	Rivera et al 2016
1.613008058	0.554541427	NA	272.7065473	11.6080651	NA	NA	NA	NA	1879.335491	NA	9.080797849	3.006032192	16.08413254	1.113491285	11.89785686	13.00179593	1.8250179	62.81563626	20.46255318	220.4591445	72.04887485	285.4945204	64.76132437	653.3271371	67.23175227	8472.176896	3.487489405	173.1740129	170.021704	NA	13MFT-2 SPOT 397	North America	Western North America	Rivera et al 2016
1.613858314	0.312450991	NA	174.3735756	5.055903273	NA	NA	NA	NA	740.8633148	NA	11.93723856	0.019871657	13.46143844	0.058097404	1.194653199	3.067181803	0.320449976	20.01844002	7.108948348	81.26250841	29.13454687	115.4489791	29.99747167	347.7032156	31.12433948	7872.977162	5.313165671	98.30520512	192.0710672	NA	13MFT-3 SPOT 481	North America	Western North America	Rivera et al 2016
1.613935142	0.352735903	NA	188.3775507	11.46573834	NA	NA	NA	NA	3336.997649	NA	9.062320964	0.093813156	11.39738735	0.698553621	14.77916309	27.53248495	4.722372436	123.5995953	37.84149158	412.4915584	128.5879136	484.0796517	106.0922321	962.7616929	110.1435912	7176.988786	2.881196856	209.3542796	167.362885	NA	13MFT-1 SPOT 335	North America	Western North America	Rivera et al 2016
1.61548198	0.621044322	NA	201.8898413	6.849550083	NA	NA	NA	NA	897.5564264	NA	10.13840546	NA	13.44479779	0.12895695	1.417548877	5.550702283	0.3612852	22.6593053	8.918180276	105.309297	35.22380661	142.816041	33.74607044	375.6842063	37.3614582	7894.879872	4.120778109	116.4741297	180.0059847	NA	13MFT-2 SPOT 377	North America	Western North America	Rivera et al 2016
1.61607215	0.475868922	NA	185.7218546	5.500820187	NA	NA	NA	NA	1005.850286	NA	11.42769464	0.075971491	12.54254364	0.087913906	2.126695053	4.534761581	0.546278708	27.0569018	8.982303962	106.9208607	38.92024986	152.3100602	38.95781202	406.4214285	41.72528415	8715.89178	4.450334147	109.6273381	167.4921154	NA	13MFT-6 SPOT 289	North America	Western North America	Rivera et al 2016
1.617208764	0.452740472	NA	200.020598	7.314686898	NA	NA	NA	NA	1239.251398	NA	6.317223223	2.623701915	11.07342438	0.707070143	6.259445966	7.925254259	1.556801561	40.63231966	13.04709127	146.9192787	47.9758422	186.8071941	43.15690719	439.7546413	44.83563569	8914.693645	2.633407969	75.02468107	104.1701601	NA	13MFT-3 SPOT 449	North America	Western North America	Rivera et al 2016
1.617474932	0.359560017	NA	275.0714485	4.95199245	NA	NA	NA	NA	1060.339825	NA	13.28326021	2.307698409	18.950762	0.580293278	5.867886521	5.339196819	0.359142828	26.84540281	9.723465718	114.2713867	40.8633303	163.4294317	41.4791122	438.141298	44.24667521	8572.617727	5.314185887	157.3193348	268.9109484	NA	13MFT-7 SPOT 532	North America	Western North America	Rivera et al 2016
1.62483399	0.694199957	NA	205.8765563	5.343392954	NA	NA	NA	NA	934.0271159	NA	12.69136728	2.718911066	20.11698491	0.985902969	6.143152735	4.908799723	0.259261887	25.99764103	7.701556164	104.0601023	35.01985497	143.6119572	35.50582468	388.8608764	37.33052262	8775.731052	4.707313158	116.7729438	198.8983282	NA	13MFT-7 SPOT 530	North America	Western North America	Rivera et al 2016
1.624860759	0.593994082	NA	191.4074821	5.110450098	NA	NA	NA	NA	710.0877392	NA	7.334538561	NA	12.50146586	0.074618397	1.455258682	3.536808469	0.184551701	16.12545969	5.432985939	71.77302745	27.11960391	114.3303697	29.26511609	318.919316	32.33984643	9534.387085	3.400836928	93.71116995	167.4848944	NA	13MFT-2 SPOT 420	North America	Western North America	Rivera et al 2016
1.625938448	1.026788385	NA	340.9431777	6.596576695	NA	NA	NA	NA	4018.571726	NA	25.53702705	0.117327399	34.19891499	0.915979369	14.00192317	30.12351342	2.720165782	148.1827266	48.04521958	517.3760038	165.9494973	589.7290995	134.8102614	1354.781648	123.6241828	6825.193532	6.787993468	434.8189325	405.0338123	NA	13MFT-2 SPOT 366	North America	Western North America	Rivera et al 2016
1.630173781	0.47043119	NA	171.1843284	5.032318467	NA	NA	NA	NA	1077.247212	NA	9.760744774	0.145040318	11.41522356	0.094397879	1.523675127	4.576950455	0.30903625	25.47065452	8.602797271	112.3958184	40.24423602	170.4373611	38.30299732	374.5660681	50.07376335	11754.78465	4.482184312	89.82581081	112.486605	NA	13MFT-7 SPOT 562	North America	Western North America	Rivera et al 2016
1.631938446	0.86486027	NA	154.0020604	11.55578017	NA	NA	NA	NA	2034.375401	NA	5.227921801	0.201903245	6.340374857	0.558705732	13.3190511	22.30915313	4.894503553	86.91176589	25.5998451	275.1650681	86.57124531	309.4499765	69.4992119	727.2365908	66.48793883	6436.112304	1.498622601	98.95379935	108.9803483	NA	13MFT-2 SPOT 347	North America	Western North America	Rivera et al 2016
1.632903422	1.24623682	NA	120.881883	7.953704109	NA	NA	NA	NA	1391.910108	NA	4.978004202	0.860927995	9.91452008	0.324152202	3.403781893	8.410205253	1.372358154	36.79069799	13.34064565	156.9153803	53.19149813	205.5191783	45.79069888	457.1386486	54.3529526	10760.33499	2.176487829	83.19051379	103.5422681	NA	13MFT-5 SPOT 643	North America	Western North America	Rivera et al 2016
1.650076811	0.241367008	NA	163.3484776	5.266627739	NA	NA	NA	NA	942.3169309	NA	9.81800211	NA	12.44316729	0.041456421	1.649279554	3.970787841	0.283447681	22.91322627	8.181233502	100.710422	35.80383203	144.962256	34.13963607	330.6145959	44.12468209	10868.34653	3.90898689	108.5945245	138.5176326	NA	13MFT-4 SPOT 474	North America	Western North America	Rivera et al 2016
1.651718031	0.449201444	NA	206.6015816	7.799897113	NA	NA	NA	NA	2300.229622	NA	7.825684902	0.229514225	11.81520141	0.443405549	9.36693396	16.92653509	2.651748867	90.64340063	27.27474355	302.9822487	96.58055427	352.9098713	79.66498444	815.104883	78.83759075	7240.36538	2.992888285	174.1512655	186.5170573	NA	13MFT-2 SPOT 341	North America	Western North America	Rivera et al 2016
1.65382111	0.433462711	NA	198.0851948	4.493233018	NA	NA	NA	NA	1033.625963	NA	10.58688554	3.075741065	17.63669801	0.926705951	6.358737969	7.062398217	0.326459043	23.9425651	9.189255974	111.6900232	40.86357735	161.8440222	37.98937955	369.097969	48.65206027	11950.05474	4.887845485	120.7439907	154.7962285	NA	13MFT-7 SPOT 613	North America	Western North America	Rivera et al 2016
1.655178633	0.16565738	NA	295.4764205	4.996008466	NA	NA	NA	NA	1582.008774	NA	26.73577841	0.429516275	25.10661502	0.250085189	3.212220103	7.561984446	0.409197785	36.94703101	13.93194884	172.2347478	61.73926085	250.9466291	58.74721052	621.5534551	65.70323348	9503.302419	10.32257941	421.5400554	599.523052	NA	13MFT-6 SPOT 319	North America	Western North America	Rivera et al 2016
1.65810082	0.383361083	NA	414.5346422	6.572886975	NA	NA	NA	NA	1252.910256	NA	11.33410017	5.881983738	22.88262629	1.484206536	11.5410954	7.788795927	0.581891782	31.63717982	12.06734462	143.9161571	49.78974906	202.8245473	50.30338648	505.7058093	53.71183244	9079.796389	5.378124593	147.3795163	257.8309152	NA	13MFT-1 SPOT 397	North America	Western North America	Rivera et al 2016
1.660269854	0.427078692	NA	225.4668985	11.67875234	NA	NA	NA	NA	2217.697739	NA	7.428601089	2.57628829	12.09495115	0.933679047	9.868720131	16.99713762	2.772543866	75.82747141	25.20388473	259.7744172	86.42023615	332.264571	74.44305158	736.7983362	77.00404473	6923.481348	3.107111682	159.2888579	178.2783775	NA	13MFT-1 SPOT 431	North America	Western North America	Rivera et al 2016
1.671394844	0.980679652	NA	156.9856071	13.50354125	NA	NA	NA	NA	1441.826576	NA	2.723779246	NA	5.24525695	0.434244086	7.492414666	12.58772183	3.254363765	60.34072404	16.97888224	191.1959101	58.48293432	223.2971342	53.09170764	538.6856506	52.73140527	6969.856681	1.259010572	63.14930664	75.48807436	NA	13MFT-3 SPOT 458	North America	Western North America	Rivera et al 2016
1.672410025	1.233556865	NA	106.7161738	14.46176982	NA	NA	NA	NA	1212.532703	NA	2.188605243	NA	3.624305429	0.192064756	4.633764483	9.691598865	2.097070798	40.1672359	12.97865235	150.1769215	50.00637618	186.7686411	41.42446928	392.4085905	49.82234928	9062.885345	1.021699727	44.5116942	48.43806801	NA	13MFT-7 SPOT 557	North America	Western North America	Rivera et al 2016
1.673396442	0.595549758	NA	165.1972083	17.028029	NA	NA	NA	NA	2101.898079	NA	2.978925953	0.399978439	5.005120215	0.732135436	11.43526534	19.77842908	6.783009476	90.62017897	25.38862833	266.0331429	85.38973125	316.8128041	71.72763337	702.4709896	72.71828251	6600.326164	1.175654953	72.57399803	81.05833379	NA	13MFT-1 SPOT 357	North America	Western North America	Rivera et al 2016
1.676585252	0.414912562	NA	163.8313422	5.500067399	NA	NA	NA	NA	600.389775	NA	11.55536028	0.35331847	10.94861176	0.153358846	1.324558176	2.285272426	0.193942343	12.8516198	5.026026804	66.63956623	23.29517343	100.023477	24.06420958	281.2260251	26.11050591	8557.484819	4.683327506	74.77929406	163.022889	NA	13MFT-3 SPOT 474	North America	Western North America	Rivera et al 2016
1.685055075	0.381680991	NA	235.1923572	5.770306594	NA	NA	NA	NA	2092.746209	NA	13.56065348	0.748351315	19.8485504	0.564755241	7.629728838	11.30264307	1.108546633	72.64831765	22.17254794	262.7699285	85.74488944	315.4278691	74.94045828	738.4823156	73.74829666	8118.574252	4.719728746	216.0879861	236.7726288	NA	13MFT-2 SPOT 314	North America	Western North America	Rivera et al 2016
1.689390853	0.725087174	NA	193.727705	5.592276925	NA	NA	NA	NA	1583.368193	NA	12.72270131	2.646733389	13.29328659	0.999945103	9.694470775	13.13428288	1.79574333	56.23133098	17.70421532	191.1132973	64.97596957	246.7300666	56.36737704	551.1558371	57.12401613	7426.291838	4.838210087	122.4595959	145.8053898	NA	13MFT-7 SPOT 512	North America	Western North America	Rivera et al 2016
1.69842683	0.26962728	NA	263.8441716	4.956723118	NA	NA	NA	NA	1385.867507	NA	13.15809001	6.750715037	26.82577715	2.215136274	10.36819303	7.566669196	0.461898696	35.67852391	12.76055478	157.0280142	53.67444487	214.4270887	50.20566364	575.3106054	54.2534106	8178.280063	4.442894254	203.8283654	272.6350576	NA	13MFT-4 SPOT 488	North America	Western North America	Rivera et al 2016
1.701149419	0.511979986	NA	206.2374539	17.76335388	NA	NA	NA	NA	2106.171254	NA	4.126297488	0.160007284	6.276826469	0.539894121	13.33521276	21.52012954	4.713759133	93.69279628	26.45637001	276.5972542	87.12358566	313.4152577	71.78795882	735.8206488	72.49910406	6291.857321	1.376784776	116.7662267	112.6822407	NA	13MFT-2 SPOT 300	North America	Western North America	Rivera et al 2016
1.706378755	0.841392147	NA	135.3256217	7.886017262	NA	NA	NA	NA	1468.08527	NA	4.886312133	NA	8.040314651	0.224816795	4.308223895	9.030737097	1.309441856	45.25680564	14.22701085	161.1131579	54.47988024	209.1190997	49.62823878	463.4121028	54.16116925	10129.19731	2.329355422	76.20789352	81.14084503	NA	13MFT-3 SPOT 436	North America	Western North America	Rivera et al 2016
1.715013829	0.235741353	NA	212.6108968	4.504749168	NA	NA	NA	NA	1193.879729	NA	16.56717641	0.091467906	15.68698704	0.069638512	1.626139067	3.966318408	0.200075216	25.43033552	9.238113681	117.661313	45.29016793	189.5309043	44.41349158	448.8710104	53.96630432	11580.26161	7.836006214	191.8211568	301.7868086	NA	13MFT-1 SPOT 364	North America	Western North America	Rivera et al 2016
1.717314012	0.45787671	NA	200.1152696	6.448706703	NA	NA	NA	NA	1049.78887	NA	10.29679465	NA	14.38138134	0.072085555	2.195070859	5.422055584	0.507389956	28.88661895	10.09965011	121.3721873	41.40214948	163.8530508	40.01300732	398.8835821	42.77418404	8854.851698	4.245603881	141.7364995	181.1459275	NA	13MFT-3 SPOT 512	North America	Western North America	Rivera et al 2016
1.728047323	0.386773246	NA	138.5541747	5.824401812	NA	NA	NA	NA	686.9942064	NA	5.828497623	0.221024201	7.832333373	0.119201492	1.769083398	2.737437776	0.481336585	19.2511905	5.736124228	73.55082192	26.16887991	108.1343529	25.65297444	267.2580133	31.34171265	10447.02827	2.608571206	59.76605357	86.29328225	NA	13MFT-7 SPOT 598	North America	Western North America	Rivera et al 2016
1.729746528	0.312063514	NA	165.2347616	5.915660433	NA	NA	NA	NA	1113.296213	NA	10.46756655	0.024576351	12.71183655	0.070501805	1.308626883	4.175315737	0.675054756	27.44655724	9.759531526	116.7730637	41.94136648	180.1680507	39.95637018	395.7383939	51.56324629	11054.20887	4.959049273	122.719464	163.1677623	NA	13MFT-5 SPOT 621	North America	Western North America	Rivera et al 2016
1.744516332	0.572012437	NA	259.8745823	7.685210691	NA	NA	NA	NA	906.3640625	NA	7.992095108	1.918690589	20.52576241	0.548634603	3.809456107	4.523964427	0.24264453	23.9918864	7.941622933	95.66756318	35.0285039	143.2908289	36.61661611	376.9783728	40.14444318	9735.351029	3.815992287	125.6051139	176.7930499	NA	13MFT-3 SPOT 528	North America	Western North America	Rivera et al 2016
1.748236961	0.384556184	NA	160.0642082	7.794227718	NA	NA	NA	NA	2830.431844	NA	7.023133686	0.035231403	12.14047928	0.545342006	9.288702095	20.17161957	3.088365128	102.8914412	30.42249821	350.927352	109.4438847	431.4255397	91.1596281	792.2621741	99.3240458	9923.128764	3.066785859	175.9537439	155.5306914	NA	13MFT-5 SPOT 703	North America	Western North America	Rivera et al 2016
1.748832509	0.429080455	NA	177.4717776	5.130449381	NA	NA	NA	NA	965.2239735	NA	12.02181608	0.030722028	13.17713908	0.024700471	1.267580991	3.733315425	0.142873685	20.1813873	7.784114165	98.48877674	35.11726384	148.6361062	36.14375629	379.0550005	46.20796542	12807.09727	5.846688642	119.5975155	179.3650538	NA	13MFT-3 SPOT 427	North America	Western North America	Rivera et al 2016
1.756526628	0.71489973	NA	156.9553548	7.183314869	NA	NA	NA	NA	1105.930386	NA	15.6909023	0.31356491	15.98355065	0.220325124	1.748077719	3.544208571	0.298301902	23.42198748	9.33468733	115.2728826	43.03220241	176.7495628	42.15227969	441.0232242	50.42896626	10756.5754	6.0101413	146.8531826	214.5916348	NA	13MFT-1 SPOT 409	North America	Western North America	Rivera et al 2016
1.767942891	0.525234182	NA	233.2868147	7.191935671	NA	NA	NA	NA	976.7073491	NA	10.99918155	1.754904318	17.83934026	0.478979347	3.701470689	5.386053753	0.514994909	26.25501585	8.986481162	105.957367	39.01862883	155.99368	37.02318909	392.0553667	42.63876616	9273.511964	4.680128107	127.5277059	169.969425	NA	13MFT-3 SPOT 526	North America	Western North America	Rivera et al 2016
1.768603337	0.596422172	NA	426.0206085	6.229121411	NA	NA	NA	NA	1192.665632	NA	10.09866991	9.269982534	30.10159618	2.30719344	14.3513217	8.19791904	0.764565347	34.86962974	11.67824559	140.5027816	47.3218046	187.0608353	45.27865882	448.5046105	46.35997821	8601.491311	3.833616329	122.6425169	168.5333728	NA	13MFT-5 SPOT 683	North America	Western North America	Rivera et al 2016
1.774380418	0.165474621	NA	480.0335523	6.109332165	NA	NA	NA	NA	3903.332621	NA	70.73344339	3.498573572	49.82855801	1.077889631	10.35722368	14.68362121	0.333118231	90.20091183	33.16867745	414.6597472	149.1569073	588.286424	138.6093564	1327.953255	164.8078039	11238.49254	22.49895452	858.7847621	1165.170157	NA	13MFT-4 SPOT 468	North America	Western North America	Rivera et al 2016
1.785677655	0.391416578	NA	174.5149405	4.769720163	NA	NA	NA	NA	1331.586374	NA	9.062506726	NA	12.22871276	0.100309512	2.440023301	7.798291301	0.641007135	41.85848486	13.89408078	156.521452	54.05052243	203.7026688	48.22605974	479.4477115	50.50791546	8360.104426	3.387369101	95.31513272	145.8501944	NA	13MFT-7 SPOT 511	North America	Western North America	Rivera et al 2016
1.790926987	0.842722011	NA	193.3328408	6.156259244	NA	NA	NA	NA	958.4369635	NA	13.13073595	2.803766688	20.40716651	1.045703467	5.957770144	4.530256476	0.412255185	25.02218976	8.520328715	104.3537168	37.9874994	152.3308979	39.12994008	422.4662236	40.10652879	9629.542948	4.990342018	132.0500405	193.0668422	NA	13MFT-3 SPOT 498	North America	Western North America	Rivera et al 2016
1.794390005	0.340738192	NA	200.9050258	7.091817638	NA	NA	NA	NA	1031.962845	NA	12.88474625	0.7102265	16.06478149	0.161409295	2.782660212	5.853658323	0.364588439	26.6820596	9.32415261	109.2719759	40.18146412	163.8134071	40.59011494	405.6678381	42.44993007	8876.426695	5.01669024	155.7069821	223.0776734	NA	13MFT-1 SPOT 371	North America	Western North America	Rivera et al 2016
1.810064207	0.665645624	NA	461.252952	8.451535364	NA	NA	NA	NA	1991.804016	NA	6.735108971	20.69792215	45.48858598	5.676755862	33.45722425	17.36910743	2.063128745	77.00162124	22.40180219	257.3046934	77.90319991	301.1866026	69.20886402	671.5107412	69.93086676	7975.858851	2.582231793	156.2775001	166.8169291	NA	13MFT-2 SPOT 399	North America	Western North America	Rivera et al 2016
1.810533039	0.630163969	NA	245.9411049	12.34670385	NA	NA	NA	NA	4244.908064	NA	10.08283698	4.919355323	20.98687008	1.682956717	21.46546257	32.60726275	5.892248892	154.813007	46.6568617	506.9950035	157.541653	585.8898153	122.0695429	1119.865598	137.9168505	9056.201435	3.718742085	263.0138805	196.4967722	NA	13MFT-5 SPOT 697	North America	Western North America	Rivera et al 2016
1.810617902	0.308840288	NA	180.1693513	6.246925318	NA	NA	NA	NA	925.8819055	NA	12.0450731	0.304470504	12.02562183	0.140083827	1.640033715	4.108882535	0.38765057	21.08173364	8.372928099	100.286769	34.54095017	142.0598633	34.29776839	360.4966223	38.71361422	9342.144787	5.024274803	111.4375306	187.1135546	NA	13MFT-6 SPOT 296	North America	Western North America	Rivera et al 2016
1.821053075	0.618876759	NA	343.610657	6.044678731	NA	NA	NA	NA	1273.560489	NA	20.4449691	7.248545375	29.58877783	1.956692373	11.2004265	7.212899163	0.350613602	32.91509635	10.7981437	134.8148397	49.2164694	201.4005251	49.3040987	516.2693107	53.71510327	9325.887896	7.991893165	220.3557388	352.2866392	NA	13MFT-1 SPOT 430	North America	Western North America	Rivera et al 2016
1.822557713	0.298533665	NA	279.4453688	6.718584987	NA	NA	NA	NA	1887.291745	NA	10.24739283	3.745461735	21.14679245	1.269570679	10.24286478	11.53265046	1.081847033	55.38642784	18.50387502	208.5175438	71.70445046	299.6007124	64.68615731	683.3993343	70.7947467	8822.536381	3.227629409	244.6123486	285.4924185	NA	13MFT-1 SPOT 408	North America	Western North America	Rivera et al 2016
1.825674142	0.202280174	NA	256.0655954	6.715214797	NA	NA	NA	NA	1450.763457	NA	33.15528649	4.502186803	32.13607983	2.021342256	10.14393772	7.87399777	0.281981853	36.08174864	12.88470111	153.9686812	53.65311768	222.2054887	52.82216927	544.5867198	59.77307967	9949.594078	8.801697538	731.5728518	665.7469715	NA	13MFT-7 SPOT 504	North America	Western North America	Rivera et al 2016
1.832281249	0.88106604	NA	255.8926788	9.254074795	NA	NA	NA	NA	1077.325656	NA	8.226102175	4.470017577	19.63490234	0.994645859	5.471848206	6.439561697	0.633726026	26.41229541	9.574335911	111.4467128	41.51716734	173.3317635	39.24551974	403.9034362	49.45183755	11070.63344	4.605223487	106.9803467	134.5339098	NA	13MFT-1 SPOT 330	North America	Western North America	Rivera et al 2016
1.837226301	0.388002052	NA	233.0796386	5.337028871	NA	NA	NA	NA	1221.447591	NA	14.75603475	1.971866052	17.1887877	0.86364006	8.629563477	6.981180516	0.164993123	32.50724146	11.44256169	135.2400709	48.2559139	191.2693806	45.35996846	472.4403084	51.72045951	9213.396106	6.267213171	163.5100813	290.2386111	NA	13MFT-7 SPOT 523	North America	Western North America	Rivera et al 2016
1.848727197	0.408975016	NA	223.6809079	13.22218757	NA	NA	NA	NA	3141.238782	NA	8.216236097	0.833167366	11.12414744	0.914736993	17.59417046	29.19012061	6.809804834	123.7872416	37.64238285	415.6306872	125.787162	465.5394919	101.8793918	1009.033664	95.76998545	6169.976079	2.853176167	184.1544902	178.148067	NA	13MFT-5 SPOT 659	North America	Western North America	Rivera et al 2016
1.849718445	0.680339645	NA	209.7039798	9.146355028	NA	NA	NA	NA	3135.804296	NA	11.00009888	0.200372066	13.79016417	0.651209378	13.47784712	27.30199387	5.028815011	117.6442993	37.40557531	402.7692112	130.0333839	474.4795476	109.2490257	1065.434697	101.8782697	6677.543863	3.663675918	231.1262737	242.1656333	NA	13MFT-2 SPOT 319	North America	Western North America	Rivera et al 2016
1.874912305	0.528857409	NA	181.278984	8.885073465	NA	NA	NA	NA	1625.604958	NA	4.936634624	1.95935791	13.49911071	0.609526468	7.706373395	10.02346012	1.147929653	52.16056617	15.78638112	184.906712	61.81664397	245.1078847	56.97145305	529.3017817	63.47059854	9630.280824	2.27494202	121.4120787	129.3004898	NA	13MFT-7 SPOT 554	North America	Western North America	Rivera et al 2016
1.887585539	0.528500792	NA	172.3365219	14.98731123	NA	NA	NA	NA	2828.575646	NA	4.374594567	0.776518807	7.106306884	1.036685048	11.56460853	20.36365745	3.87346194	100.1232278	32.09261022	336.7960845	106.814117	418.4217053	84.63160023	744.3980943	99.90034333	9909.446383	2.023047501	118.9446577	104.2465459	NA	13MFT-5 SPOT 631	North America	Western North America	Rivera et al 2016
1.896706171	1.036434897	NA	193.8077664	7.167650819	NA	NA	NA	NA	1136.380529	NA	9.705506988	13.53993549	30.09257486	4.155357936	24.29901944	12.47939265	0.261018146	34.33467131	9.627109487	130.2692461	40.9903538	181.1699068	39.00313626	404.3344341	50.59615747	14108.69897	5.01551659	153.7656441	198.1458341	NA	13MFT-6 SPOT 279	North America	Western North America	Rivera et al 2016
1.910235248	0.360173758	NA	237.8417293	13.73166027	NA	NA	NA	NA	1195.220271	NA	6.690733715	1.232039321	10.04085269	0.54039885	6.061514769	9.283786094	1.442584884	36.61290218	11.78666279	135.3328755	46.30851436	186.2156314	42.9689403	412.8824052	45.91889794	6906.177022	2.953716681	181.4534025	147.7290803	NA	13MFT-1 SPOT 342	North America	Western North America	Rivera et al 2016
1.911558028	0.776415079	NA	220.8019641	6.12999538	NA	NA	NA	NA	967.783696	NA	11.75006961	0.084958061	16.97354315	0.061696222	1.280238394	3.175877885	0.139368156	18.3157659	7.770147023	99.03529329	37.22664614	161.9876165	39.34767719	421.9828408	46.23587878	9781.689683	5.689322298	161.1002186	257.0203097	NA	13MFT-1 SPOT 412	North America	Western North America	Rivera et al 2016
1.925856791	0.560971869	NA	278.9049385	6.956105742	NA	NA	NA	NA	1550.495502	NA	9.131452275	0.031635516	28.07157434	0.238548798	4.339578355	6.853617873	0.748988953	43.99563431	14.40390531	170.3050988	61.24770622	240.0344025	57.91311209	575.3139319	66.0954992	9587.426112	3.788529877	437.1556855	267.5941899	NA	13MFT-2 SPOT 294	North America	Western North America	Rivera et al 2016
1.926286431	0.349607925	NA	190.8458987	5.445090402	NA	NA	NA	NA	918.5942307	NA	11.17544902	0.021521046	12.63765613	0.072545109	1.33992156	4.478969654	0.438467138	23.9377013	8.176389996	101.6130186	34.77310534	144.6786709	35.57336327	369.2157042	38.84096706	8718.921513	4.820513255	117.471011	182.0067656	NA	13MFT-2 SPOT 415	North America	Western North America	Rivera et al 2016
1.940197277	0.846956619	NA	129.0154548	14.30541877	NA	NA	NA	NA	822.4286161	NA	1.725633543	0.023165699	2.609616468	0.179466757	3.00457474	7.617600949	1.786598036	28.77547354	9.570220187	103.2347861	32.26814598	123.3284222	29.64777728	305.4214741	31.29963734	6305.873699	0.759809253	25.62382948	43.08448818	NA	13MFT-7 SPOT 521	North America	Western North America	Rivera et al 2016
1.944196113	1.420397434	NA	150.5808419	7.700094317	NA	NA	NA	NA	694.278169	NA	6.340600725	0.011835106	8.063194325	0.082180555	1.497513273	3.831638642	0.453010107	21.0830706	6.949218159	77.67646654	26.81295539	108.4561844	25.04510323	280.9318204	29.65439216	7082.116283	2.839696323	60.43874322	94.02279322	NA	13MFT-1 SPOT 437	North America	Western North America	Rivera et al 2016
1.944950456	1.47948207	NA	189.9698448	3.790901638	NA	NA	NA	NA	942.1864716	NA	12.88500174	1.54675321	13.99546129	0.427424186	2.294389772	2.794951648	0.119412004	15.9652151	7.284697276	90.48494977	34.25590704	158.1954327	39.06071016	413.5507742	45.02213968	12975.41738	6.264023393	112.0048544	207.4446724	NA	13MFT-2 SPOT 325	North America	Western North America	Rivera et al 2016
1.949853434	0.697795395	NA	197.5765479	6.361071851	NA	NA	NA	NA	1990.188318	NA	8.320785272	0.495238174	14.29529327	0.320222062	4.912189778	11.76799839	1.652641424	62.68072109	20.10855885	224.9643868	81.53202194	305.7046611	67.88302875	678.8639038	71.58968861	8756.71482	3.501651403	170.7901221	192.6525461	NA	13MFT-3 SPOT 497	North America	Western North America	Rivera et al 2016
1.953986556	0.483849825	NA	144.7263246	8.038668506	NA	NA	NA	NA	1406.806069	NA	3.357130651	0.242456461	7.321265321	0.322330865	4.561848099	9.69442434	1.415381175	50.18709091	15.11803491	162.0107479	53.20276812	202.0469615	47.67306192	461.6958804	48.89927542	7536.198137	1.681689413	77.00499768	98.66630308	NA	13MFT-1 SPOT 399	North America	Western North America	Rivera et al 2016
1.963487769	0.569518704	NA	187.6125425	7.065648248	NA	NA	NA	NA	857.3516229	NA	11.04936389	0.108708603	13.54267207	0.094781542	1.659224562	4.467560688	0.167064004	20.94480715	8.159746709	95.24760815	33.44868581	135.4095369	33.40204326	357.2913803	36.46340731	9245.921213	4.439833856	115.9323643	179.5965054	NA	13MFT-3 SPOT 529	North America	Western North America	Rivera et al 2016
1.985818359	0.528092504	NA	166.0058312	11.38264066	NA	NA	NA	NA	1789.598218	NA	4.182045543	0.290752834	6.348779956	0.50768548	7.899821212	12.43023919	2.506814002	60.62645883	19.31652883	217.1442793	69.06590301	270.9816569	58.34021932	515.4736371	66.86712987	9681.856249	1.879217982	77.09990021	76.49021527	NA	13MFT-4 SPOT 442	North America	Western North America	Rivera et al 2016
1.987631054	0.803394099	NA	152.8920162	9.123418027	NA	NA	NA	NA	1451.469279	NA	5.32406233	0.101781759	6.393633739	0.333281059	8.183288741	15.32332232	3.582559108	60.63650845	17.4423183	193.8381567	60.77250536	216.4008893	51.91193491	531.2557137	48.47651481	6096.09088	2.030782572	67.46226696	92.95616677	NA	13MFT-3 SPOT 465	North America	Western North America	Rivera et al 2016
1.989280233	0.548554963	NA	168.4284485	10.5338613	NA	NA	NA	NA	2619.626547	NA	6.881017335	0.107211702	9.785303727	0.560192344	8.073796161	17.694825	3.158279117	84.09284986	27.25588415	301.0205204	99.97710852	382.2166058	76.34808646	717.1320147	95.0183222	10373.71383	2.508891577	142.2892428	119.7721797	NA	13MFT-5 SPOT 633	North America	Western North America	Rivera et al 2016
1.9923229	0.33375039	NA	159.3287177	6.896181174	NA	NA	NA	NA	1759.314898	NA	5.380564626	0.918185263	12.56470007	0.589871654	6.356964887	12.1915774	1.315402418	58.64633705	17.84809079	203.6596548	68.30326578	264.8864751	60.09140341	576.630708	62.5484704	8448.54576	2.313791388	136.0386417	154.6369702	NA	13MFT-1 SPOT 410	North America	Western North America	Rivera et al 2016
2.008927181	0.537860055	NA	227.4112818	8.300004338	NA	NA	NA	NA	822.5293849	NA	9.5823317	3.293058573	17.69806272	0.807967234	4.745313048	4.66853284	0.255087827	21.82566369	7.153972731	93.4907139	31.7505597	130.1631623	32.04051352	352.3705087	35.23854307	8950.521206	4.440963562	100.1824031	152.174273	NA	13MFT-3 SPOT 452	North America	Western North America	Rivera et al 2016
2.023527605	0.732714578	NA	245.9132713	14.45879338	NA	NA	NA	NA	3010.04936	NA	5.947763224	1.939598191	10.03237165	1.119693317	15.36858708	27.36966419	5.398971267	121.6448367	34.67646881	378.1744254	118.9810804	450.1292767	97.96161286	884.89379	101.2374148	8618.535675	2.327555441	153.0371952	120.6550435	NA	13MFT-2 SPOT 327	North America	Western North America	Rivera et al 2016
2.054482691	0.60578846	NA	144.2605259	9.751646434	NA	NA	NA	NA	2136.316947	NA	6.655633564	0.141113709	7.092247702	0.341148496	7.523593847	15.97937728	3.356070652	78.56288667	22.18732352	261.6644672	83.06045503	305.3424597	63.92942303	605.762581	74.5815595	9349.090512	1.979274984	90.08814421	82.38555559	NA	13MFT-5 SPOT 701	North America	Western North America	Rivera et al 2016
2.05758465	0.514942266	NA	273.5300256	9.143712802	NA	NA	NA	NA	856.2536634	NA	8.574407666	14.6534741	34.12846591	3.5449058	23.64696374	9.363481949	0.671367628	28.55764141	8.522805583	97.32181926	33.54822414	136.4674839	31.97428442	350.1619669	34.61336064	7812.648633	4.081427275	102.7561063	152.1677251	NA	13MFT-2 SPOT 407	North America	Western North America	Rivera et al 2016
2.060451066	1.188065098	NA	226.1416968	10.43425158	NA	NA	NA	NA	3231.820586	NA	10.35456432	1.84232014	20.40626981	1.381445681	16.44063024	26.33565624	2.842794412	110.7484222	37.2694211	407.316761	131.4226608	480.0834589	111.6293948	1103.071924	105.1557696	8015.205004	4.202008902	294.6828074	261.1153018	NA	13MFT-4 SPOT 487	North America	Western North America	Rivera et al 2016
2.065589575	0.988911836	NA	196.2676974	19.53633367	NA	NA	NA	NA	1438.060351	NA	1.711907513	0.209204081	4.887671053	0.553580744	7.090851255	12.73219945	3.683442279	53.02234555	16.53968246	183.6257039	59.18114711	215.8521828	48.35564063	489.8692102	51.24860152	7280.391796	1.062264895	60.0700598	74.42313588	NA	13MFT-6 SPOT 286	North America	Western North America	Rivera et al 2016
2.068424865	0.514846085	NA	130.4898822	8.440529714	NA	NA	NA	NA	1132.602374	NA	4.186702967	0.665307726	9.663250848	0.377933957	3.275403616	8.454771083	1.087229784	38.89863386	12.17142788	142.6333005	46.78391856	171.7337464	40.01943251	399.551372	42.12189822	8363.795686	1.674588988	69.4317551	101.5048314	NA	13MFT-6 SPOT 285	North America	Western North America	Rivera et al 2016
2.072719529	0.561989878	NA	179.0575995	6.166609247	NA	NA	NA	NA	862.8873586	NA	11.27364193	NA	13.01829098	0.103319079	1.154919159	3.501326846	0.375230169	21.00152863	7.712871486	93.0778388	33.44735689	134.9676334	33.4719071	356.7497637	37.79668469	8856.050374	4.760080543	108.2971677	166.2688826	NA	13MFT-3 SPOT 453	North America	Western North America	Rivera et al 2016
2.08218277	0.533071024	NA	187.3157185	14.58047569	NA	NA	NA	NA	2345.759139	NA	5.439117541	0.413521695	7.01658547	0.608733642	12.07324814	25.12628538	5.88296977	95.46004673	28.09792939	309.359987	95.71644621	350.2916086	78.25400818	781.8780294	76.77754136	6199.1519	1.607533373	111.3375619	125.3677488	NA	13MFT-7 SPOT 515	North America	Western North America	Rivera et al 2016
2.084672148	0.493215178	NA	240.7201373	19.41662617	NA	NA	NA	NA	2202.701104	NA	3.360335322	0.7188511	7.38684569	0.837530368	12.28192735	20.72265494	5.538755042	87.11703006	26.93052638	285.6459666	88.57547338	334.1108644	75.24826183	772.6495279	80.50106071	5705.681795	1.604132077	118.7064049	123.7957554	NA	13MFT-7 SPOT 529	North America	Western North America	Rivera et al 2016
2.08842962	1.278469959	NA	182.9865924	9.541208752	NA	NA	NA	NA	1051.351219	NA	8.981321405	0.296349879	14.61738704	0.178520862	3.086526508	6.628737395	0.634152324	32.6257771	10.37136855	121.5253686	44.25536326	155.5798938	37.97998081	395.552361	43.75987865	8437.017015	3.879123289	123.0457957	176.0619633	NA	13MFT-1 SPOT 380	North America	Western North America	Rivera et al 2016
2.091903583	0.487754395	NA	643.5971593	5.375914626	NA	NA	NA	NA	1308.594811	NA	14.10341868	10.21182112	32.59407703	2.849185342	15.27182662	7.690541106	0.312533555	31.11488545	11.37707589	134.5753101	47.06912061	207.034648	46.17371301	462.5048068	58.19026308	11884.73457	5.250036065	173.6676219	231.137676	NA	13MFT-6 SPOT 277	North America	Western North America	Rivera et al 2016
2.122827207	1.267661703	NA	247.2840674	6.560829217	NA	NA	NA	NA	968.3524887	NA	12.05892523	4.885699547	25.09444454	1.099353148	9.936402775	6.655248441	0.337011417	25.71808497	9.043773831	108.2372108	38.20637613	156.6310949	36.7555576	398.3203061	41.98301608	8774.678257	5.033748066	145.6024763	221.3490347	NA	13MFT-5 SPOT 668	North America	Western North America	Rivera et al 2016
2.138895877	0.4608069	NA	268.0928214	16.87649419	NA	NA	NA	NA	2004.498497	NA	9.614857714	2.523111931	13.49515184	0.933991618	11.79903563	14.98591351	3.315859685	72.54570641	21.59937608	242.7657209	81.54003516	309.1422396	67.06066266	647.0542436	72.57987665	7371.410161	3.406910411	254.0382604	171.6304784	NA	13MFT-1 SPOT 337	North America	Western North America	Rivera et al 2016
2.144984018	0.464859395	NA	171.7598427	7.972681949	NA	NA	NA	NA	759.0405921	NA	7.470854642	0.146658926	10.77638625	0.077097345	1.942828146	4.741342972	0.577498159	20.33174065	7.262874779	83.85559691	29.47394759	117.2932325	28.48863514	317.8383673	32.98909613	8282.893097	2.979762338	78.79935109	115.9101042	NA	13MFT-3 SPOT 535	North America	Western North America	Rivera et al 2016
2.145846272	1.03833407	NA	273.4221257	17.93304172	NA	NA	NA	NA	2859.693165	NA	8.438152796	3.238861771	15.01114509	1.449438885	22.15148498	31.19672349	6.802550912	117.6711637	35.05248735	376.4464694	118.3225629	391.3828403	95.7073545	926.1025654	94.01691924	6626.333761	2.560044405	174.2399966	155.2319912	NA	13MFT-2 SPOT 361	North America	Western North America	Rivera et al 2016
2.14871595	0.792001586	NA	219.8964925	7.45340341	NA	NA	NA	NA	1249.464396	NA	13.22674661	0.993912659	18.02229055	0.278499643	3.632203364	7.081753929	0.6921015	36.24774667	10.91668406	142.3214079	49.14620926	199.6626528	45.6909343	474.7623557	52.31060359	9803.05501	5.368822882	194.2712876	222.1601863	NA	13MFT-2 SPOT 391	North America	Western North America	Rivera et al 2016
2.154545174	0.929021907	NA	179.8320284	15.66736339	NA	NA	NA	NA	2492.502269	NA	5.465384803	0.898610247	7.725175788	0.774924305	13.61899116	24.54410435	5.932086859	101.9249499	30.17097145	325.6088026	99.61427061	375.1309548	83.08616896	787.8974722	83.20465143	7289.923348	1.745022128	108.8799311	100.715454	NA	13MFT-3 SPOT 515	North America	Western North America	Rivera et al 2016
2.157196509	1.011879236	NA	160.7582346	9.241004127	NA	NA	NA	NA	866.4579992	NA	9.882165962	2.086684395	14.23422427	0.310110807	2.924529066	4.392479868	0.500891973	19.6822452	7.614091256	88.69042917	33.01046987	137.4825273	32.30847783	341.6460663	36.76796657	9747.410263	3.706048846	117.5090226	153.6204651	NA	13MFT-7 SPOT 597	North America	Western North America	Rivera et al 2016
2.179865197	0.560432811	NA	282.6394209	6.673086626	NA	NA	NA	NA	878.8422533	NA	10.55297116	7.388772186	25.24298981	1.802002006	10.27129399	6.166655927	0.462695733	29.6860595	9.069992916	100.7370618	35.5878709	140.256097	33.05401253	355.7283356	36.62353118	8025.339951	4.074308612	115.7112636	171.9394736	NA	13MFT-2 SPOT 412	North America	Western North America	Rivera et al 2016
2.200079112	0.505306135	NA	307.690074	7.887801742	NA	NA	NA	NA	1011.163652	NA	9.022957065	7.20772942	21.88469486	1.723953718	12.79437856	8.527297209	0.691998218	31.30174753	9.643298725	114.0622001	37.41637616	158.8274146	37.76696324	379.4962955	40.51142621	9471.081634	4.092291407	104.6094499	134.2592482	NA	13MFT-7 SPOT 501	North America	Western North America	Rivera et al 2016
2.235461221	0.619618238	NA	163.7453892	12.15125547	NA	NA	NA	NA	1576.974844	NA	4.116404489	1.049884214	7.886857545	0.585971878	8.555738199	14.34310363	2.778763125	57.04326911	17.89368973	202.9840034	65.6341768	238.6456539	53.12157077	547.5922746	54.92136178	6566.453009	1.4810713	78.24299548	103.5001673	NA	13MFT-2 SPOT 331	North America	Western North America	Rivera et al 2016
2.258919707	0.781556595	NA	196.1428189	10.51047584	NA	NA	NA	NA	781.0134223	NA	6.45126361	0.471678327	8.60685869	0.120618901	2.811843287	4.701387815	0.564441674	23.37437027	7.841906265	89.35728082	30.6689905	122.8780788	29.8103026	330.4359626	31.99233058	6831.02145	2.567794134	84.46996875	114.6744741	NA	13MFT-2 SPOT 337	North America	Western North America	Rivera et al 2016
2.26465651	1.543985439	NA	156.1526945	9.689185295	NA	NA	NA	NA	2233.631258	NA	4.88643378	0.326584528	10.8965183	0.542720899	10.49556628	16.46927787	2.220257823	84.49242803	25.2832915	302.5789271	96.37423318	353.9558285	78.21436358	756.7717553	80.86803856	10247.36674	2.586397039	155.2119105	143.4562198	NA	13MFT-2 SPOT 394	North America	Western North America	Rivera et al 2016
2.295844179	0.578457341	NA	229.6714669	12.80706241	NA	NA	NA	NA	1988.037901	NA	5.374124782	2.901861892	12.32686277	1.069084863	11.75903063	17.91272842	3.452562419	78.66077958	23.21754619	257.2291284	79.69710051	301.292183	66.59313286	664.4694959	69.1418515	6897.166626	2.057744631	117.1611851	125.4172815	NA	13MFT-6 SPOT 303	North America	Western North America	Rivera et al 2016
2.304640498	0.995563311	NA	195.7933148	26.24020371	NA	NA	NA	NA	1122.729214	NA	0.931923774	0.145995617	2.470857063	0.357020575	7.492540423	11.88100933	5.088649651	48.2778469	13.98095596	147.2423807	44.28550729	171.0474706	38.31651527	399.8851517	40.65702637	5921.507881	0.574981564	31.37265644	39.79318193	NA	13MFT-7 SPOT 542	North America	Western North America	Rivera et al 2016
2.314097099	0.250687929	NA	403.5637318	9.092963854	NA	NA	NA	NA	2105.53311	NA	26.39133194	14.07880715	65.57372404	4.214508451	24.21228488	13.26299736	0.356447102	57.55546284	19.89707903	238.617177	81.96391782	332.6295791	75.68158394	764.1775664	77.62780688	9040.441903	7.93086058	953.80754	890.5643503	NA	13MFT-1 SPOT 346	North America	Western North America	Rivera et al 2016
2.329527022	0.537132301	NA	389.6592856	14.86814539	NA	NA	NA	NA	3259.763349	NA	10.17623769	5.7738919	18.90096297	2.120793926	21.145196	30.89010115	4.303129489	128.1240737	39.25403326	424.5708134	136.7246153	483.4264274	105.5180098	1063.724395	106.5988489	6588.393407	3.211685797	257.8538388	215.5731373	NA	13MFT-3 SPOT 539	North America	Western North America	Rivera et al 2016
2.336079412	1.556802979	NA	231.0067228	6.59373594	NA	NA	NA	NA	1047.831895	NA	15.80071854	0.304044299	16.3178872	0.248341231	1.709406857	3.817631255	0.474621282	26.74868015	9.701500674	119.4267103	39.77176561	169.2132792	42.00527414	454.922195	44.00058182	9202.65048	6.806842964	157.6697195	262.8620481	NA	13MFT-2 SPOT 298	North America	Western North America	Rivera et al 2016
2.371444135	0.714132216	NA	204.5164628	9.222350738	NA	NA	NA	NA	898.0910484	NA	8.131132073	0.668542751	9.857575457	0.394533248	2.827266577	5.216698744	0.736442794	23.63034888	8.894234457	102.8503238	36.17720148	143.3755828	33.02575438	342.1413576	35.81986611	6949.188513	3.3196512	95.59007532	127.8652246	NA	13MFT-7 SPOT 533	North America	Western North America	Rivera et al 2016
2.425210967	1.02109871	NA	186.6231916	7.319643851	NA	NA	NA	NA	1218.029294	NA	6.871517862	1.883465504	10.99756758	0.574342587	6.711873793	9.339664376	1.684597483	40.7861845	13.07572248	138.3594662	46.95234867	174.1639126	39.87068964	429.7955268	42.35251539	7835.072966	2.872870734	77.72509483	115.9600195	NA	13MFT-5 SPOT 663	North America	Western North America	Rivera et al 2016
2.442175347	0.783216775	NA	298.7150971	12.74483995	NA	NA	NA	NA	6358.944076	NA	19.40807701	1.459974178	25.12224324	1.372650541	25.94585284	52.05643297	9.108920929	235.5252898	71.60309754	749.3818856	239.8030506	879.5595383	177.2870278	1558.368109	195.1146359	7419.029956	4.01886663	441.6970028	268.052807	NA	13MFT-1 SPOT 328	North America	Western North America	Rivera et al 2016
2.465900015	0.592048621	NA	177.3116165	6.897478617	NA	NA	NA	NA	1108.744804	NA	12.63411128	0.173574564	13.11173712	0.134441293	1.330904861	4.285714518	0.297315554	24.05564207	9.635164682	118.6528494	42.91764641	185.5280737	41.95317659	405.4013913	52.84796979	11757.37559	5.62529172	143.1582946	210.2311146	NA	13MFT-5 SPOT 637	North America	Western North America	Rivera et al 2016
2.503690448	1.138217331	NA	268.4483211	6.226607846	NA	NA	NA	NA	1331.775708	NA	10.86552828	0.840011307	27.82677565	0.316655167	2.850268359	5.971719835	0.171595577	29.58449966	10.85097015	134.7976094	45.94443233	198.2233147	47.23922136	500.550633	53.04789143	9178.129753	4.762625047	260.3811893	329.3581232	NA	13MFT-6 SPOT 306	North America	Western North America	Rivera et al 2016
2.546210519	0.98480918	NA	497.4072783	15.7279265	NA	NA	NA	NA	1160.266763	NA	5.981099323	10.24906659	25.43259685	2.681964361	21.75871427	11.65129099	1.813120915	41.8841404	11.84735256	141.6494888	44.0058356	174.5270352	41.87983758	429.3555964	43.4189489	7090.052703	2.690738437	89.35394907	119.5937217	NA	13MFT-4 SPOT 496	North America	Western North America	Rivera et al 2016
2.628470046	1.048317699	NA	198.12777	10.43919268	NA	NA	NA	NA	2734.084842	NA	8.820136781	0.166915482	9.459264339	0.943465489	17.53375029	30.88829867	5.918062195	118.0829887	33.98571762	369.9501681	112.7526659	410.2871441	97.56844508	1020.639388	86.35563494	6139.327162	2.917486117	138.7296248	166.3538927	NA	13MFT-3 SPOT 466	North America	Western North America	Rivera et al 2016
2.630189438	1.405396253	NA	130.6861887	8.909580731	NA	NA	NA	NA	1220.061764	NA	4.74054034	1.463177638	8.730494682	0.541540323	5.404852371	8.880992	1.434084787	40.62081084	13.74946892	148.1494074	47.45994654	180.6463352	42.57195821	457.9756782	44.64495765	7767.49501	2.103624695	65.22471967	81.46496792	NA	13MFT-3 SPOT 499	North America	Western North America	Rivera et al 2016
2.718063071	0.831289352	NA	250.9534356	16.08641409	NA	NA	NA	NA	1958.832182	NA	3.329809382	0.113983301	5.256871729	0.410668687	8.435154176	15.38796504	2.869338616	77.04601266	21.93452134	246.6299505	77.13064332	286.3176009	59.53890899	558.1241602	73.03823761	8376.730633	1.420127376	87.19912502	70.72356586	NA	13MFT-7 SPOT 571	North America	Western North America	Rivera et al 2016
2.722113767	0.966957356	NA	380.2864062	12.16267627	NA	NA	NA	NA	1935.650995	NA	8.057195291	14.27629939	33.41481806	3.913381644	24.56990987	17.98154197	1.780066083	71.24961393	21.22294122	231.8736782	78.879046	294.9436785	67.07605745	636.6263086	73.81399241	9112.874901	3.75496117	177.7412707	144.6244788	NA	13MFT-3 SPOT 435	North America	Western North America	Rivera et al 2016
2.724857065	0.37401513	NA	142.9947642	8.58016053	NA	NA	NA	NA	1715.007243	NA	4.286284031	0.197612163	8.67891674	0.501318108	9.128959391	17.52077742	2.305296062	66.71232815	20.23295236	220.7744976	70.56348683	267.5579354	57.58882596	607.0862235	59.60894345	7455.103102	2.15166144	91.47185782	110.2241333	NA	13MFT-1 SPOT 379	North America	Western North America	Rivera et al 2016
2.732028943	0.658020295	NA	181.9957447	7.92593136	NA	NA	NA	NA	1989.700155	NA	6.118889452	1.592943594	11.3076188	0.726848582	9.695051714	13.55784259	2.454075955	66.90225937	22.27838407	244.8919362	78.12207666	303.0904668	64.67235036	622.6837494	75.90981381	9134.657507	2.318024202	115.2222455	111.1442974	NA	13MFT-6 SPOT 275	North America	Western North America	Rivera et al 2016
2.772009047	2.495443381	NA	151.5578601	8.232014083	NA	NA	NA	NA	999.5691052	NA	9.354688855	1.240148691	13.08632286	0.186896733	1.687080021	3.702462897	0.511706261	27.17045287	8.518873549	106.2067448	38.73643196	162.3732262	35.81364267	371.3666845	48.23655647	12301.19968	4.397438923	114.970542	144.8078879	NA	13MFT-5 SPOT 622	North America	Western North America	Rivera et al 2016
2.799260318	1.530723066	NA	105.1254533	11.2017654	NA	NA	NA	NA	1033.155342	NA	1.678586091	NA	3.112770562	0.214754492	4.769664445	9.274606709	2.285339912	43.02918231	12.51965444	132.8239759	41.56965942	159.3389193	34.12784798	374.7779347	37.27457108	6468.098797	0.904176699	33.94862289	51.56427253	NA	13MFT-2 SPOT 358	North America	Western North America	Rivera et al 2016
2.872244286	1.560151871	NA	193.067054	6.590553674	NA	NA	NA	NA	924.3938677	NA	11.48692759	0.042695441	14.48894363	0.088314356	1.700519205	4.031472903	0.329376885	24.98906564	8.485708806	104.8903394	36.43395877	152.2983814	38.13529998	401.4839129	39.90745952	8040.033065	4.885993359	122.7319439	209.4494338	NA	13MFT-5 SPOT 660	North America	Western North America	Rivera et al 2016
2.896906537	1.722728461	NA	122.1728537	12.92017909	NA	NA	NA	NA	969.5365009	NA	2.485074033	0.029186989	4.798863083	0.1700328	1.8463081	5.481533957	1.081886431	29.17683816	9.087545756	108.4301627	38.4428509	148.0999216	33.35414409	327.3839584	42.19179698	9293.647272	1.419417557	51.25159569	59.16837006	NA	13MFT-5 SPOT 641	North America	Western North America	Rivera et al 2016
2.90896219	0.510174159	NA	234.0844212	8.4838392	NA	NA	NA	NA	1152.786767	NA	8.194760584	0.780166747	20.64375278	0.360859299	3.781241644	5.50173902	0.286627601	32.28962942	10.73855624	117.774277	42.17255375	168.4232564	41.04844763	405.6574362	53.53305272	11588.93528	3.525515894	142.5751184	165.5695132	NA	13MFT-7 SPOT 569	North America	Western North America	Rivera et al 2016
2.962152625	0.739787664	NA	221.8755416	22.28101162	NA	NA	NA	NA	3055.907503	NA	9.600030941	0.968240339	10.36486621	0.73755179	16.2241008	31.6661212	6.319028563	121.2070837	37.91130653	407.8351172	128.0780961	463.2690951	105.4859566	1014.150041	101.2048666	6872.547867	2.539878029	181.0061588	165.7656364	NA	13MFT-3 SPOT 454	North America	Western North America	Rivera et al 2016
2.997684026	0.881709556	NA	248.4511758	15.29757285	NA	NA	NA	NA	2036.458108	NA	3.98781727	4.664441703	11.71146866	1.62417295	16.16948317	21.65219451	4.600245925	76.13777269	24.35461515	262.6577937	84.05972492	305.4765122	69.97587234	678.4411892	73.06126023	7169.127943	1.596548682	89.07921548	89.951897	NA	13MFT-2 SPOT 387	North America	Western North America	Rivera et al 2016
3.011731862	0.66751911	NA	248.029621	12.47563044	NA	NA	NA	NA	1605.35328	NA	9.913533104	1.453032203	13.08216759	0.703452555	6.312540403	10.61845606	1.858952231	47.436505	15.63830837	178.439836	59.896131	230.6193059	54.16124293	513.0959455	53.8535245	6605.77894	3.221968746	193.9174096	171.5961032	NA	13MFT-6 SPOT 294	North America	Western North America	Rivera et al 2016
3.018544549	0.595949687	NA	216.3033266	9.736764568	NA	NA	NA	NA	2989.191406	NA	8.591799585	4.650418106	18.79839086	1.85760094	16.21459905	24.55248589	3.661763064	109.5353966	33.50117908	355.1617273	112.176479	441.0130363	90.11015695	831.652224	104.4294722	8628.205132	2.630813177	185.2053503	152.0741541	NA	13MFT-5 SPOT 693	North America	Western North America	Rivera et al 2016
3.073165304	2.726086518	NA	258.3253075	5.969068611	NA	NA	NA	NA	1420.751974	NA	11.00396986	3.053442355	48.82417332	0.99429995	8.965122424	7.941304313	0.721784504	39.03965156	13.81805709	176.1150334	60.24556934	229.8156867	55.22477885	523.022909	61.59280619	8737.147954	4.512975595	171.5511569	215.0663787	NA	13MFT-4 SPOT 500	North America	Western North America	Rivera et al 2016
3.100689769	0.499432216	NA	204.0798107	8.842015322	NA	NA	NA	NA	1609.043742	NA	11.79940036	0.291664706	14.92273033	0.29267078	4.565934156	9.946981746	1.03993431	48.47759174	15.79669158	177.4149388	63.45475614	253.7656056	54.96291795	531.6213801	65.15162082	9754.444404	4.713069662	160.3803149	162.6818897	NA	13MFT-5 SPOT 690	North America	Western North America	Rivera et al 2016
3.117872953	0.656559621	NA	165.8022203	9.068244416	NA	NA	NA	NA	2178.016569	NA	6.247236977	0.081785327	7.306295571	0.394737174	8.397113883	17.81816656	2.956773026	81.8968396	25.55591383	279.7813517	87.63198448	330.7857134	74.54329418	768.3031594	73.40066787	6770.750812	2.760690791	134.2356658	158.2122697	NA	13MFT-2 SPOT 318	North America	Western North America	Rivera et al 2016
3.149973936	2.360502767	NA	180.9520479	16.53405038	NA	NA	NA	NA	1490.636019	NA	2.710949773	1.661575378	6.105214021	0.711617727	8.418581031	13.9738731	2.969760338	55.30823578	17.27054883	181.6013434	60.1882729	223.7815639	49.01868533	474.3651337	53.05247807	7973.072858	1.035713517	55.00649327	66.26135014	NA	13MFT-7 SPOT 553	North America	Western North America	Rivera et al 2016
3.151336357	0.80359542	NA	171.3537467	16.96678771	NA	NA	NA	NA	1886.799227	NA	3.533234648	0.482631642	7.653924443	0.65051816	8.692706395	16.48828448	3.369235255	68.56136498	21.03480905	236.301008	74.3493798	281.911048	60.77152952	629.538541	64.74112536	6827.625995	1.355697384	95.88608108	107.0241346	NA	13MFT-1 SPOT 383	North America	Western North America	Rivera et al 2016
3.163316595	3.330555389	NA	186.2357189	8.545482177	NA	NA	NA	NA	1389.512418	NA	7.458195069	1.050924442	13.26844743	0.4329786	6.417850359	7.034153752	0.657127524	49.64520532	13.78239771	165.1256627	54.10242075	210.2352391	49.26963496	495.7641775	53.96316208	10904.89539	4.418679331	118.4427871	133.4792282	NA	13MFT-2 SPOT 393	North America	Western North America	Rivera et al 2016
3.197809921	0.952478546	NA	231.5215394	10.24312463	NA	NA	NA	NA	1123.983455	NA	10.05567278	0.823273658	18.64827755	0.155658333	2.092229269	5.05076301	0.161327288	24.77281982	9.335337634	109.3150252	40.50167327	175.0259122	40.57719109	416.1582623	53.69066062	11543.12914	4.750736951	161.4555961	195.8913233	NA	13MFT-5 SPOT 704	North America	Western North America	Rivera et al 2016
3.2	0.21	NA	NA	6.09	NA	NA	NA	0.304	854	NA	4.63	0.013	5.62	0.122	1.82	3.07	0.89	14.6	4.92	63.5	23.4	117	27.8	274	48.9	5156	2.48	231	239	NA	BHSL2.2.1	Asia	SE Asia	Sutherland et al 2016
3.233853555	1.832401563	NA	151.0789037	16.78125349	NA	NA	NA	NA	1723.039815	NA	3.195068017	0.130293721	6.253075611	0.390383692	7.070154287	13.42940176	2.607985858	58.13511956	18.34128215	200.3539401	66.52137289	255.2590736	54.52678947	535.0435078	66.34068171	8798.690273	1.595266897	105.5838094	94.45488864	NA	13MFT-5 SPOT 640	North America	Western North America	Rivera et al 2016
3.235683686	0.982644175	NA	179.3534121	11.45909595	NA	NA	NA	NA	1765.388423	NA	4.398086277	0.150297729	5.939769105	0.271269058	7.178075915	14.89317789	2.796962896	71.51858574	21.0833654	230.99655	71.79389954	261.6444792	60.10836869	601.4962707	60.13271046	6498.52785	1.803064161	85.31008078	96.90135366	NA	13MFT-2 SPOT 367	North America	Western North America	Rivera et al 2016
3.237172607	0.990946109	NA	597.4588952	13.74794305	NA	NA	NA	NA	2110.378738	NA	3.883882058	16.31450872	29.95406498	4.972923844	31.79921943	26.57253271	4.480372092	85.70598911	26.02413291	271.6955329	80.66668951	308.0326473	73.52384295	709.6401236	66.97951329	6655.505548	1.94082625	88.94847695	105.9747984	NA	13MFT-4 SPOT 480	North America	Western North America	Rivera et al 2016
3.239206541	1.297588196	NA	236.6935274	5.632914565	NA	NA	NA	NA	1501.113675	NA	7.872701684	2.740168624	17.24591786	0.962806446	7.411156646	8.184754365	0.775139248	45.57482926	14.92777575	174.674289	57.46806001	224.3757871	51.88974375	521.8573918	56.61593113	9720.490329	3.50813613	132.2352618	158.3280314	NA	13MFT-2 SPOT 392	North America	Western North America	Rivera et al 2016
3.240841286	1.114929902	NA	183.6350868	12.48827794	NA	NA	NA	NA	1226.718792	NA	10.69127001	0.538007619	13.61086339	0.238526483	3.017068428	6.720190935	0.810571194	34.44792492	12.82086196	144.7245789	50.57978495	188.6196174	44.19951034	447.5446356	47.14179994	9078.513214	3.844380354	126.7632518	139.2364127	NA	13MFT-3 SPOT 514	North America	Western North America	Rivera et al 2016
3.341629769	1.087960906	NA	270.2368657	12.62804971	NA	NA	NA	NA	1938.475147	NA	10.07509927	2.995446582	15.52976107	1.240819781	10.48697312	12.85387861	1.812234368	59.21072256	18.92643361	221.6729652	73.67159938	284.1571941	60.85437217	583.7618472	74.83942721	8460.766882	3.473122389	235.1739844	161.0101664	NA	13MFT-4 SPOT 446	North America	Western North America	Rivera et al 2016
3.352081475	1.227961306	NA	149.3989462	13.89390726	NA	NA	NA	NA	1801.377747	NA	3.203739061	1.335029725	9.161581217	0.613518885	9.119434251	14.75826588	2.729101524	65.57190581	19.19516349	219.5206574	69.12880622	265.349656	59.90379856	550.1936285	66.2102761	8253.708873	1.325161289	79.26223378	81.36556946	NA	13MFT-3 SPOT 456	North America	Western North America	Rivera et al 2016
3.401528541	2.098824662	NA	234.9673382	11.45043239	NA	NA	NA	NA	2089.33345	NA	4.326440028	1.969774216	20.89052644	1.217155744	12.92757961	20.11607674	2.665372244	79.58036968	23.90087037	258.3944624	85.583538	322.5978162	70.37238469	709.3473697	75.17508401	8278.481172	2.301491612	115.7368756	120.5283192	NA	13MFT-6 SPOT 315	North America	Western North America	Rivera et al 2016
3.436018765	1.235020817	NA	155.5008363	8.580989697	NA	NA	NA	NA	818.0780146	NA	9.02799273	0.210325857	11.86655424	0.032835842	1.075133355	3.068195824	0.251984383	20.43711175	7.233611932	82.80337362	32.36334708	131.9979396	29.4505006	310.1302828	40.52707761	11310.97568	3.795623754	83.7703301	115.5296303	NA	13MFT-5 SPOT 706	North America	Western North America	Rivera et al 2016
3.490768588	1.556026576	NA	165.4779688	16.38979025	NA	NA	NA	NA	1531.488232	NA	2.129763918	0.231324001	3.872439841	0.374813523	6.744317504	12.58706385	3.619160105	61.05686714	19.03248386	197.1250473	62.52716008	227.9219326	52.47630524	534.8976641	52.08752981	6305.575157	0.919592125	52.89215021	69.86779891	NA	13MFT-7 SPOT 522	North America	Western North America	Rivera et al 2016
3.491924398	2.314226936	NA	165.8634962	7.289435429	NA	NA	NA	NA	643.1124906	NA	8.821315338	0.229987185	12.05225891	0.06783541	1.262129682	4.019525362	0.196101256	17.14522046	6.23884494	71.77586894	23.80755957	98.67833206	25.83872484	283.5732757	28.44666119	7968.781136	3.330219393	76.38533165	133.9771068	NA	13MFT-2 SPOT 346	North America	Western North America	Rivera et al 2016
3.542846756	1.427914078	NA	160.0351009	14.19937185	NA	NA	NA	NA	2438.609874	NA	6.23458761	1.279343307	10.86605026	0.816387735	11.30719866	22.40654644	3.04839631	85.67871025	26.64688438	291.4963007	93.73057349	356.0894384	76.52352999	717.3149314	83.83372092	9542.681211	2.812210916	129.4240403	120.9156471	NA	13MFT-1 SPOT 329	North America	Western North America	Rivera et al 2016
3.553960776	1.098379145	NA	303.4278133	10.81518309	NA	NA	NA	NA	2334.896853	NA	10.01034614	5.515252565	19.96264808	1.890103802	16.85152172	19.6048807	3.426087095	90.98893246	27.49926191	312.5243965	98.3952391	352.4925315	83.50139637	779.9634861	80.80411688	7317.825276	2.921353815	177.3029722	170.2615793	NA	13MFT-2 SPOT 321	North America	Western North America	Rivera et al 2016
3.6	0.21	NA	NA	3.83	NA	NA	NA	0.166	294	NA	1.78	0.003	1.96	0.015	0.28	0.62	0.21	3.73	1.47	21	8.34	44.9	11.7	121	22.5	5645	1.27	25.1	61.3	NA	BHSL2.2.2	Asia	SE Asia	Sutherland et al 2016
3.6	0.28	NA	NA	15.9	NA	NA	NA	0.168	293	NA	1.06	0.002	1.93	0.02	0.31	0.63	0.22	3.97	1.52	21.3	8.41	44.9	11.5	120	22.4	5664	0.65	28.8	65.2	NA	BHSL2.1.2	Asia	SE Asia	Sutherland et al 2016
3.624184502	1.08051741	NA	382.4470439	11.14159274	NA	NA	NA	NA	2168.437217	NA	7.108318579	23.59431237	26.79824877	7.032007027	36.24027382	26.50610481	0.955297297	73.46557666	23.11654443	268.3491248	87.76486848	334.4387496	70.11900357	616.3688051	85.72257637	10565.09344	3.254443381	217.3431254	181.5203424	NA	13MFT-7 SPOT 561	North America	Western North America	Rivera et al 2016
3.628523178	3.044219063	NA	227.5900472	6.663526197	NA	NA	NA	NA	1493.82464	NA	7.309760442	12.00956799	31.79839017	3.01834112	19.37042821	12.71760461	0.890198197	50.55642613	16.01495106	187.2562721	62.00538002	232.7095094	51.4261492	480.6981656	55.53022549	8474.897684	3.435534957	169.4237816	164.8404591	NA	13MFT-1 SPOT 405	North America	Western North America	Rivera et al 2016
3.730851865	1.032984141	NA	191.6565005	5.772971352	NA	NA	NA	NA	3053.067565	NA	4.940768174	0.095245329	19.24865763	0.26552401	6.864786292	17.41347981	1.299494427	75.37512068	24.89033089	315.41316	108.5845685	426.777911	96.61997565	832.5406753	115.7929326	7966.297952	2.093150056	251.1158555	182.7483612	NA	13MFT-6 SPOT 299	North America	Western North America	Rivera et al 2016
3.745669717	1.015880698	NA	332.0047488	9.170950977	NA	NA	NA	NA	808.767405	NA	10.77293571	9.995908591	25.28784632	2.287808862	15.38367495	7.822268682	0.315844337	21.52070269	7.526533205	92.35898993	33.36476689	121.4204198	30.6173651	335.7872658	35.69660559	8677.391878	4.304499269	95.63140744	144.454309	NA	13MFT-3 SPOT 508	North America	Western North America	Rivera et al 2016
3.777415584	1.1384462	NA	173.3689618	9.024733898	NA	NA	NA	NA	696.2632907	NA	9.368204656	0.348129998	11.68975993	0.117648488	1.238183499	3.762436663	0.350515185	18.81597848	6.14845539	72.60680155	27.35313575	109.0469829	26.60747083	292.5029153	28.76381462	8488.297779	4.248693419	81.94673725	151.3201925	NA	13MFT-5 SPOT 671	North America	Western North America	Rivera et al 2016
3.777830863	0.651554548	NA	328.7395062	7.325553344	NA	NA	NA	NA	885.8369585	NA	13.46883575	6.829118466	25.59365395	1.755301027	9.726765861	5.271240798	0.29152953	22.13752693	7.88190996	101.5108916	35.25411888	146.6471801	35.5847126	392.9485138	38.84939908	8906.726545	5.215476866	118.7719591	196.8882948	NA	13MFT-2 SPOT 372	North America	Western North America	Rivera et al 2016
3.8	0.23	NA	NA	3.34	NA	NA	NA	0.218	470	NA	1.97	0.003	3.02	0.028	0.45	1.02	0.32	6.24	2.38	33.1	12.9	68.6	17.3	177	33.2	5521	1.35	51.4	96.8	NA	BHSL2.1.1	Asia	SE Asia	Sutherland et al 2016
3.890038878	2.683317905	NA	121.6760146	14.81814289	NA	NA	NA	NA	1185.61205	NA	1.630383731	0.04317863	3.176144084	0.235819033	4.844167642	8.394389572	2.790751482	47.79367365	12.97345848	141.2341375	47.92830893	180.9520018	36.26177051	383.6369176	45.97894893	7883.12239	0.731282396	36.37597287	41.85040885	NA	13MFT-1 SPOT 333	North America	Western North America	Rivera et al 2016
3.89597766	1.795316891	NA	251.7580767	12.41328747	NA	NA	NA	NA	3392.295753	NA	11.27744308	0.183724528	13.96283977	0.636733681	14.27598162	30.89815754	5.044286566	128.6889861	41.18575184	427.3961195	138.5515082	506.0014438	117.319116	1156.942175	108.9779949	7862.560773	4.043635255	257.0102949	227.8977714	NA	13MFT-2 SPOT 322	North America	Western North America	Rivera et al 2016
3.934747365	0.735916828	NA	164.4628095	9.628797158	NA	NA	NA	NA	1725.906475	NA	5.251796411	0.260109147	8.114531619	0.325292685	6.180567758	12.50157308	2.054071222	62.91529202	19.10190811	212.4881126	65.17373712	257.0534215	58.0630057	589.1611604	58.54229107	7163.467348	2.101339028	114.4993652	123.2835462	NA	13MFT-2 SPOT 336	North America	Western North America	Rivera et al 2016
3.970710354	1.198074648	NA	272.6704981	9.908681012	NA	NA	NA	NA	797.7463869	NA	6.655161337	4.807019861	16.94393866	1.2418336	8.759162922	5.281001046	0.755071037	24.74107273	8.164834889	93.93815864	33.12268913	126.6192098	30.27491512	326.7266044	35.95832721	7414.445347	2.972583778	76.43234829	110.8642913	NA	13MFT-5 SPOT 678	North America	Western North America	Rivera et al 2016
4	0.18	NA	NA	1.73	NA	NA	NA	0.367	1083	NA	3.36	0.015	2.75	0.141	2.25	4.1	0.71	19.3	6.48	83.2	30.1	147.9	35	340	58.6	5507	1.91	74.6	145	NA	BHSL2.3.2	Asia	SE Asia	Sutherland et al 2016
4.026506805	1.730335732	NA	119.6080048	16.2043888	NA	NA	NA	NA	1181.643245	NA	1.408599597	0.111081495	2.676822278	0.292143321	5.469389252	11.41894034	3.440725381	48.53334909	14.46212442	154.0307303	47.46480425	172.4520889	38.61453219	398.381046	41.78594688	6277.226065	0.632485489	29.2875035	39.39095969	NA	13MFT-6 SPOT 309	North America	Western North America	Rivera et al 2016
4.035542525	1.830576098	NA	226.7243283	19.6843379	NA	NA	NA	NA	1917.721288	NA	9.981856012	5.481121425	16.6446894	1.633674818	15.70291461	15.05894786	3.022451264	70.52924954	21.25955287	236.0383208	72.20566578	279.7570851	61.76614823	639.7428122	67.6723202	6401.779467	2.927731473	177.7673386	144.8442227	NA	13MFT-4 SPOT 478	North America	Western North America	Rivera et al 2016
4.071935424	1.906425052	NA	164.3327333	10.85781052	NA	NA	NA	NA	712.4834761	NA	6.060890813	0.213122196	7.577581752	0.135223328	1.262608128	3.69392821	0.344000717	20.65281296	6.66087264	78.25334877	26.77592097	105.4412175	26.37308933	275.7911442	28.44518404	7799.433168	2.411919346	57.61985372	95.3150552	NA	13MFT-7 SPOT 516	North America	Western North America	Rivera et al 2016
4.172912498	1.578502869	NA	229.2687276	14.11070279	NA	NA	NA	NA	1966.748633	NA	5.295810928	3.894661957	15.85801476	1.430867922	14.43522917	16.34692664	2.008334128	70.2761053	20.39723519	227.1643208	75.21634009	276.7103913	62.76446102	611.1629869	61.47875644	7674.14508	2.248757864	128.3397963	145.2608749	NA	13MFT-6 SPOT 324	North America	Western North America	Rivera et al 2016
4.2	0.16	NA	NA	1.43	NA	NA	NA	0.481	1533	NA	2.87	0.021	3.91	0.154	2.66	5.23	0.98	25.7	8.83	115.4	42.3	211.2	50.3	482	82.3	5710	2.08	146	259	NA	BHSL2.3.1	Asia	SE Asia	Sutherland et al 2016
4.246418968	1.434987519	NA	299.9346484	9.488919647	NA	NA	NA	NA	1430.41435	NA	4.477569016	5.907025833	18.07888518	1.637680038	13.60549509	12.61455499	1.91710272	48.68364629	15.67895301	173.7336742	54.36012233	220.3623551	49.69731078	494.6637202	53.75661215	7406.272898	2.544849462	89.23821686	99.60755442	NA	13MFT-6 SPOT 316	North America	Western North America	Rivera et al 2016
4.266588964	0.860385579	NA	173.1923862	11.83841897	NA	NA	NA	NA	1267.841932	NA	6.134382045	0.639508386	7.654631179	0.220969769	3.308088792	9.073423506	1.825708702	42.26584164	13.354828	154.1188777	50.23244298	195.8270637	43.65640179	427.3293774	46.91627986	7767.687873	2.495202504	100.9169721	107.9659126	NA	13MFT-3 SPOT 511	North America	Western North America	Rivera et al 2016
4.4	0.2	NA	NA	3.3	NA	NA	NA	NA	NA	NA	NA	NA	NA	NA	NA	NA	NA	NA	NA	NA	NA	NA	NA	NA	NA	NA	NA	172	274	Late Dacite Dike	TT91_7.1	South America	South America	Munoz et al 2012
4.412421376	0.832906978	NA	174.9504398	7.950630012	NA	NA	NA	NA	698.1590212	NA	11.29779357	0.857783763	12.60687278	0.24018946	2.084590335	2.860451866	0.211323635	14.04114987	6.048631842	73.78641181	26.80888862	111.8899032	28.16382784	303.0674738	30.48731534	8762.436149	5.104339104	89.01085016	166.6712731	NA	13MFT-2 SPOT 350	North America	Western North America	Rivera et al 2016
4.5	0.2	NA	NA	2.7	NA	NA	NA	NA	NA	NA	NA	NA	NA	NA	NA	NA	NA	NA	NA	NA	NA	NA	NA	NA	NA	NA	NA	275	362	Late Dacite Dike	TT91_2.1	South America	South America	Munoz et al 2012
4.536601516	2.413943535	NA	160.783637	21.09923023	NA	NA	NA	NA	671.2915273	NA	10.35505793	4.211513236	17.19868453	0.905690533	4.863512246	1.974857939	0.524260086	13.95708869	5.705477468	68.6105844	25.70100816	99.99942556	25.11940954	268.5879142	25.74525152	7148.775272	2.935983312	75.39613063	147.7144372	NA	13MFT-2 SPOT 406	North America	Western North America	Rivera et al 2016
4.603338464	1.501904972	NA	176.1441314	13.19089737	NA	NA	NA	NA	1435.478233	NA	2.712988556	0.289621666	5.680226027	0.344683202	5.860724216	10.07015838	1.984483333	52.99343518	14.92609387	169.9641073	56.75174728	214.8498414	49.50557989	466.7194075	54.57220257	9055.868053	1.677948581	66.94336815	72.83366734	NA	13MFT-3 SPOT 426	North America	Western North America	Rivera et al 2016
4.638481727	0.609886869	NA	204.6432274	17.56853003	NA	NA	NA	NA	1689.705221	NA	13.60649759	2.389599979	18.22695853	0.623393832	3.564740645	8.053937942	0.614797775	40.05546795	13.63631131	174.9531727	62.42268596	272.6042362	60.40581832	502.1815114	77.9888859	13630.26593	6.67695884	180.0326607	180.6442704	NA	13MFT-3 SPOT 430	North America	Western North America	Rivera et al 2016
4.7	0.4	NA	NA	3.2	NA	NA	NA	NA	405.8	NA	NA	0.088	26.6	0.096	1.01	1.71	0.64	9.7	2.9	36.6	14.5	63.6	16.1	135.8	31.9	3026.6	NA	160	227	Late Dacite Dike	TT91_4.1	South America	South America	Munoz et al 2012
4.7	0.2	NA	NA	3.7	NA	NA	NA	NA	NA	NA	NA	NA	NA	NA	NA	NA	NA	NA	NA	NA	NA	NA	NA	NA	NA	NA	NA	180	295	Late Dacite Dike	TT91_8.1	South America	South America	Munoz et al 2012
4.7	0.2	NA	NA	2.1	NA	NA	NA	NA	462.2	NA	NA	0.064	38.9	0.155	1.71	2.68	1.03	13.4	3.7	43.3	16.9	71.8	17.5	144.2	34.3	3110.4	NA	280	356	Late Dacite Dike	TT91_10.1	South America	South America	Munoz et al 2012
4.8	0.4	NA	NA	1.8	NA	NA	NA	NA	375.3	NA	NA	0.063	22.4	0.062	0.6	1.22	0.52	7.9	2.5	31.3	13.4	60.9	15.1	136.9	36.3	3351.9	NA	32	215	Late Dacite Dike	TT91_17.1	South America	South America	Munoz et al 2012
4.8	1	NA	NA	8.2	NA	NA	NA	NA	596.3	NA	NA	0.05	13.1	0.057	0.48	0.87	0.26	4.8	1.5	18.2	7.1	31.4	7.7	66.5	14.9	2796.8	NA	34	57	Central Diorite	TT90_3.2	South America	South America	Munoz et al 2012
4.8	0.4	NA	NA	NA	NA	NA	NA	NA	NA	NA	NA	NA	NA	NA	NA	NA	NA	NA	NA	NA	NA	NA	NA	NA	NA	NA	NA	177	263	Late Dacite Dike	TT91_15.1	South America	South America	Munoz et al 2012
4.9	0.4	NA	NA	2.4	NA	NA	NA	NA	922.9	NA	NA	0.087	51	0.14	1.48	3.07	1.12	19.7	6.3	77.9	32.7	143.6	35	283.4	68.1	3073.1	NA	203	272	Late Dacite Dike	TT91_12.1	South America	South America	Munoz et al 2012
5	0.2	NA	NA	3.5	NA	NA	NA	NA	389.6	NA	NA	0.066	8.8	0.413	3.74	3.79	1.43	14	3.5	38.3	14.3	58.1	14.2	119.8	28	2466	NA	264	391	Late Dacite Dike	TT91_5.1	South America	South America	Munoz et al 2012
5.042507839	0.840021905	NA	207.0029872	9.657085802	NA	NA	NA	NA	2243.755069	NA	6.252226945	4.115041299	17.78612563	1.454751601	13.80215415	16.2818455	1.50143963	75.57387111	23.41100573	264.1017427	84.38005842	330.2847187	72.05804968	665.1042643	81.21793018	10220.92003	2.92162645	178.6476214	168.5215219	NA	13MFT-6 SPOT 268	North America	Western North America	Rivera et al 2016
5.053123738	3.432531705	NA	215.2566348	12.91248993	NA	NA	NA	NA	2255.106341	NA	5.174604036	0.089651091	11.02744365	0.322123187	6.660682792	15.1998273	2.565832081	70.56980102	22.96314869	260.2279457	84.03968199	332.7249275	72.05486995	675.0201922	83.09566541	10450.81495	1.758089256	157.670292	142.7623401	NA	13MFT-1 SPOT 331	North America	Western North America	Rivera et al 2016
5.1	0.8	NA	NA	NA	NA	NA	NA	NA	NA	NA	NA	NA	NA	NA	NA	NA	NA	NA	NA	NA	NA	NA	NA	NA	NA	NA	NA	78	85	Central Diorite	TT90_5.1	South America	South America	Munoz et al 2012
5.2	0.4	NA	NA	1.3	NA	NA	NA	NA	NA	NA	NA	NA	NA	NA	NA	NA	NA	NA	NA	NA	NA	NA	NA	NA	NA	NA	NA	434	485	Late Dacite Dike	TT91_3.1	South America	South America	Munoz et al 2012
5.226975978	0.944462456	NA	262.1498429	25.88821348	NA	NA	NA	NA	2232.524009	NA	7.913053686	7.296182129	14.59927763	2.567761603	21.58471017	22.57223145	1.983886671	87.45601946	26.04570819	272.9844184	86.98013174	314.2112366	64.95413647	631.0131586	75.57055589	8968.889691	3.112666046	141.8696997	126.9424519	NA	13MFT-4 SPOT 462	North America	Western North America	Rivera et al 2016
5.231672877	1.976379421	NA	358.7680846	14.6367133	NA	NA	NA	NA	3827.60322	NA	14.39392282	5.751577788	26.45182884	2.290293599	27.9165306	40.19729177	5.068446375	164.4975742	48.55075434	500.2403748	159.6059969	582.0970508	121.8511394	1175.814457	117.2631525	6557.997809	3.417393277	299.9581672	223.273211	NA	13MFT-1 SPOT 420	North America	Western North America	Rivera et al 2016
5.296470835	1.195537434	NA	173.3917838	13.82975095	NA	NA	NA	NA	2149.361359	NA	6.995646597	0.80550583	10.26899361	0.611496045	8.274696454	16.6002223	2.5246799	76.25686127	25.79258254	258.96837	85.51984705	321.6520785	72.08737851	661.1106441	80.57257382	8421.551649	2.620285333	130.9134361	112.6620909	NA	13MFT-7 SPOT 1162	North America	Western North America	Rivera et al 2016
5.3	0.8	NA	NA	3.9	NA	NA	NA	NA	1122.1	NA	NA	0.072	11	0.04	0.41	0.7	0.32	4.4	1.4	17.2	7.4	34.9	9.3	87.4	21.5	3097.6	NA	34	60	Northern Diorite	TT102_12.2	South America	South America	Munoz et al 2012
5.313251823	2.433286353	NA	148.0957337	10.72810751	NA	NA	NA	NA	1822.86324	NA	4.410995616	0.826097817	11.88730808	0.669984737	7.653013041	15.47000165	1.729886818	63.10047209	19.57223476	217.8861089	71.65564233	267.5186452	58.89459314	569.059497	64.22703691	8986.423947	1.96221951	104.443126	119.2784561	NA	13MFT-1 SPOT 406	North America	Western North America	Rivera et al 2016
5.406283271	0.733684285	NA	272.5804988	21.52330255	NA	NA	NA	NA	1355.392931	NA	21.11364775	7.109471962	27.40044132	2.238626547	11.26799102	7.990793688	0.863750704	37.77172464	13.31358627	152.8635831	53.07025485	213.5098258	53.98551208	564.6370162	56.13389112	8641.665914	8.903196936	154.493124	329.749757	NA	13MFT-2 SPOT 368	North America	Western North America	Rivera et al 2016
5.502401562	1.212601919	NA	249.7652212	NA	NA	NA	NA	NA	374.2272594	NA	NA	0.76682911	10.51413715	NA	NA	2.626125329	0.910647967	NA	NA	34.18008307	NA	NA	NA	NA	24.79896885	NA	NA	63.04267502	105.7922082	NA	callen\080503\negt-079	South America	South America	Zhu et al 2020
5.509501723	1.428963712	NA	150.009972	10.06149875	NA	NA	NA	NA	2147.737139	NA	5.002013792	0.645243788	7.790546275	0.495419427	8.578315589	16.77472306	3.318285712	79.17073063	24.53697324	280.5995929	86.74436164	325.8512352	68.88965869	683.916744	78.58253741	8940.036896	2.130589563	102.4326862	102.7352125	NA	13MFT-2 SPOT 289	North America	Western North America	Rivera et al 2016
5.6	0.6	NA	NA	6.3	NA	NA	NA	NA	35	NA	NA	0.079	8.8	0.339	3.52	4.03	1.44	14.2	3.5	37.7	13.7	55.6	13.2	110.2	26.7	2482.4	NA	45	71	Central Diorite	TT90_5.2	South America	South America	Munoz et al 2012
5.6	0.6	NA	NA	7.2	NA	NA	NA	NA	395.8	NA	NA	0.075	9.3	0.109	1.12	1.59	0.66	7.8	2.4	30.8	13.7	63.7	17	146.8	38.1	2361.3	NA	71	93	Sewell Stock	TT101_7.2	South America	South America	Munoz et al 2012
5.7	0.6	NA	NA	NA	NA	NA	NA	NA	NA	NA	NA	NA	NA	NA	NA	NA	NA	NA	NA	NA	NA	NA	NA	NA	NA	NA	NA	50	62	Central Diorite	TT90_8.1	South America	South America	Munoz et al 2012
5.7	0.8	NA	NA	7.3	NA	NA	NA	NA	389.6	NA	NA	0.066	8.8	0.413	3.74	3.79	1.43	14	3.5	38.3	14.3	58.1	14.2	119.8	28	2466	NA	52	64	A Porphyry	TT150_5.2	South America	South America	Munoz et al 2012
5.7	0.6	NA	NA	7.2	NA	NA	NA	NA	NA	NA	NA	NA	NA	NA	NA	NA	NA	NA	NA	NA	NA	NA	NA	NA	NA	NA	NA	62	98	Central Diorite	TT90_12.1	South America	South America	Munoz et al 2012
5.8	0.6	NA	NA	3.9	NA	NA	NA	NA	NA	NA	NA	NA	NA	NA	NA	NA	NA	NA	NA	NA	NA	NA	NA	NA	NA	NA	NA	41	89	Sewell Stock	TT101_3.1	South America	South America	Munoz et al 2012
5.867914636	2.193577973	NA	215.388024	14.58537429	NA	NA	NA	NA	1961.210162	NA	6.393073718	2.935224259	12.77360049	1.249113574	14.20105307	18.87363953	4.205402146	78.92071713	23.6927127	253.0296933	79.75181376	289.3876093	68.39508942	668.298172	65.81886538	6392.215876	2.2060009	116.7893408	132.5441792	NA	13MFT-2 SPOT 362	North America	Western North America	Rivera et al 2016
5.9	0.6	NA	NA	6.9	NA	NA	NA	NA	NA	NA	NA	NA	NA	NA	NA	NA	NA	NA	NA	NA	NA	NA	NA	NA	NA	NA	NA	51	95	Northern Diorite	TT102_4.1	South America	South America	Munoz et al 2012
5.9	0.6	NA	NA	7.1	NA	NA	NA	NA	330.6	NA	NA	0.061	9.4	0.097	1.05	1.5	0.61	7.3	2.2	27	11.9	54.8	14.5	126.6	32.6	2449.7	NA	86	138	Northern Diorite	TT102_8.1	South America	South America	Munoz et al 2012
5.9	0.6	NA	NA	4.9	NA	NA	NA	NA	NA	NA	NA	NA	NA	NA	NA	NA	NA	NA	NA	NA	NA	NA	NA	NA	NA	NA	NA	133	174	Northern Diorite	TT102_3.1	South America	South America	Munoz et al 2012
6	0.8	NA	NA	6	NA	NA	NA	NA	466.6	NA	NA	0.064	10.3	0.052	0.55	0.91	0.35	5	1.5	18.4	7.3	33.1	8.2	72.9	16.2	2771.8	NA	22	45	Central Diorite	TT90_11.2	South America	South America	Munoz et al 2012
6	0.8	NA	NA	7.9	NA	NA	NA	NA	NA	NA	NA	NA	NA	NA	NA	NA	NA	NA	NA	NA	NA	NA	NA	NA	NA	NA	NA	24	45	Sewell Stock	TT101_1.2	South America	South America	Munoz et al 2012
6	0.3	NA	NA	3.4	NA	NA	NA	NA	234.8	NA	NA	0.086	6.2	0.175	1.76	2.01	0.76	7.2	2	21.6	8.4	37.5	9.7	84.8	20.6	2525.5	NA	2519	3848	Sewell Stock	TT101_9.1	South America	South America	Munoz et al 2012
6.1	0.8	NA	NA	9.3	NA	NA	NA	NA	130.7	NA	NA	0.059	5.7	0.043	0.44	0.69	0.3	3.3	1	11.4	4.5	20	5.3	49.9	11.3	2364.6	NA	32	53	A Porphyry	TT150_7.1	South America	South America	Munoz et al 2012
6.1	0.2	NA	NA	NA	NA	NA	NA	NA	NA	NA	NA	NA	NA	NA	NA	NA	NA	NA	NA	NA	NA	NA	NA	NA	NA	NA	NA	564	1569	Northern Diorite	TT102_11.2	South America	South America	Munoz et al 2012
6.1	0.2	NA	NA	1.2	NA	NA	NA	NA	709	NA	NA	0.097	25.3	0.202	1.92	3.1	1.18	16	4.7	55	22.3	97.9	23.7	203.3	49.7	3365.7	NA	1101	2587	Sewell Stock	TT101_7.1	South America	South America	Munoz et al 2012
6.198774395	0.990989797	NA	333.1397447	5.188042666	NA	NA	NA	NA	1324.803107	NA	19.89865395	12.65098343	53.56176679	3.613483008	22.56625897	12.67223484	0.362457988	40.84135633	12.39897621	139.8748105	47.91497414	194.6442385	50.66579643	566.6872138	51.7544626	9008.38577	7.814301276	252.1390172	467.1925157	NA	13MFT-2 SPOT 304	North America	Western North America	Rivera et al 2016
6.2	0.6	NA	NA	7.2	NA	NA	NA	NA	278.7	NA	NA	0.069	8.5	0.087	1.03	1.36	0.52	6.6	1.9	23.7	10.4	48.1	12.7	113.8	29.2	2786	NA	42	77	Late Dacite Dike	TT91_4.2	South America	South America	Munoz et al 2012
6.2	0.6	NA	NA	9.4	NA	NA	NA	NA	411.1	NA	NA	0.072	8.6	0.408	4.02	4.18	1.38	14.4	3.6	39.2	14.6	62.4	15.3	125.8	30.7	2307.6	NA	58	69	A Porphyry	TT150_13.2	South America	South America	Munoz et al 2012
6.2	4	NA	NA	3	NA	NA	NA	NA	313.7	NA	NA	0.099	17.5	0.053	0.53	1.04	0.41	6.4	2	25.1	10.8	49	13.1	117.3	28.8	3102.1	NA	298	362	Sewell Stock	TT101_10.1	South America	South America	Munoz et al 2012
6.250584471	1.061250877	NA	198.6024263	10.90790815	NA	NA	NA	NA	727.8684441	NA	4.820957623	1.706760348	7.685947181	0.774943008	4.482022225	5.599913525	0.939342351	24.7065334	7.920842169	83.69766268	29.27347155	113.2345071	26.84040364	292.2242275	29.21232475	7045.418905	1.776559008	36.74390029	66.07903482	NA	13MFT-7 SPOT 509	North America	Western North America	Rivera et al 2016
6.3	0.8	NA	NA	6	NA	NA	NA	NA	261.8	NA	NA	0.06	7.9	0.166	1.91	2.28	86	0.8	2.3	24.6	9.5	41.6	10.6	92.4	21.8	2676.6	NA	42	53	Sewell Stock	TT101_4.2	South America	South America	Munoz et al 2012
6.3	0.8	NA	NA	4.9	NA	NA	NA	NA	405.6	NA	NA	0.062	11.2	0.229	2.69	3.62	1.33	14.2	3.7	39.8	14.6	61.1	15.1	126.6	31.3	2754.2	NA	54	68	Sewell Stock	TT101_3.2	South America	South America	Munoz et al 2012
6.3	0.4	NA	NA	8.6	NA	NA	NA	NA	899.9	NA	NA	0.118	14.4	0.794	6.26	6.2	2.44	25.8	7.2	81.5	31.1	131.5	32.1	256.5	63.5	2217.1	NA	158	155	Sewell Stock	TT101_9.2	South America	South America	Munoz et al 2012
6.3	0.4	NA	NA	1.3	NA	NA	NA	NA	NA	NA	NA	NA	NA	NA	NA	NA	NA	NA	NA	NA	NA	NA	NA	NA	NA	NA	NA	209	566	Northern Diorite	TT102_13.1	South America	South America	Munoz et al 2012
6.365056169	1.67717723	NA	279.9476761	17.56600536	NA	NA	NA	NA	2727.652684	NA	10.12552387	5.056470669	17.43373206	1.595809115	15.15093894	25.28524791	5.189085458	104.7122857	32.65721104	361.4591349	117.3435027	424.3280435	90.22888852	909.4248627	91.93617551	7332.423884	2.956429029	200.0102793	179.9631021	NA	13MFT-2 SPOT 379	North America	Western North America	Rivera et al 2016
6.4	0.6	NA	NA	5	NA	NA	NA	NA	619.3	NA	NA	0.067	9.2	0.042	0.49	0.7	0.27	3.6	1.1	13	5.5	24.2	6.2	61.3	13.8	2903.3	NA	37	80	Northern Diorite	TT102_1.1	South America	South America	Munoz et al 2012
6.4	1	NA	NA	8.1	NA	NA	NA	NA	366.6	NA	NA	0.08	8.4	0.058	0.67	1.05	0.41	4.8	1.5	17.3	7.2	32.8	8.7	79.9	19.9	2629.2	NA	45	85	Central Diorite	TT90_3.1	South America	South America	Munoz et al 2012
6.4	0.6	NA	NA	5.9	NA	NA	NA	NA	NA	NA	NA	NA	NA	NA	NA	NA	NA	NA	NA	NA	NA	NA	NA	NA	NA	NA	NA	60	73	A Porphyry	TT150_4.1	South America	South America	Munoz et al 2012
6.4	0.2	NA	NA	5	NA	NA	NA	NA	NA	NA	NA	NA	NA	NA	NA	NA	NA	NA	NA	NA	NA	NA	NA	NA	NA	NA	NA	459	1192	A Porphyry	TT150_13.1	South America	South America	Munoz et al 2012
6.4	0.4	NA	NA	6.7	NA	NA	NA	NA	NA	NA	NA	NA	NA	NA	NA	NA	NA	NA	NA	NA	NA	NA	NA	NA	NA	NA	NA	2782	3616	Sewell Stock	TT101_1.1	South America	South America	Munoz et al 2012
6.5	1.4	NA	NA	7.8	NA	NA	NA	NA	188.7	NA	NA	0.096	8.4	0.129	1.11	1.44	0.52	5.6	1.7	18.1	7.2	32.8	8.3	76.2	19	2290.6	NA	26	43	Central Diorite	TT90_17.1	South America	South America	Munoz et al 2012
6.5	0.8	NA	NA	8.4	NA	NA	NA	NA	37.4	NA	NA	0.081	9.1	0.342	3.6	4	1.42	15.1	3.8	41.6	15.9	62.9	14.9	119.6	27.7	2349.1	NA	42	52	Central Diorite	TT90_14.1	South America	South America	Munoz et al 2012
6.5	0.2	NA	NA	11.8	NA	NA	NA	NA	3002.3	NA	NA	0.136	47.6	1.585	14.27	23.87	9.6	117	29.8	308.3	108.9	422.8	97.5	714.7	167.9	2209	NA	920	542	A Porphyry	TT150_6.1	South America	South America	Munoz et al 2012
6.6	0.8	NA	NA	6.3	NA	NA	NA	NA	361	NA	NA	0.074	7.9	0.347	3.47	3.63	1.44	12.9	3.1	34.4	12.9	53.5	13.1	111.8	26.9	2428.3	NA	48	62	A Porphyry	TT150_1.1	South America	South America	Munoz et al 2012
6.7	1	NA	NA	6.1	NA	NA	NA	NA	NA	NA	NA	NA	NA	NA	NA	NA	NA	NA	NA	NA	NA	NA	NA	NA	NA	NA	NA	18	36	A Porphyry	TT150_11.1	South America	South America	Munoz et al 2012
6.7	0.8	NA	NA	5.6	NA	NA	NA	NA	75.1	NA	NA	0.075	7.8	0.14	1.63	2.33	0.97	9.5	2.5	26.5	9.9	41.7	10.3	91.5	21.5	2625.8	NA	37	55	Northern Diorite	TT102_2.1	South America	South America	Munoz et al 2012
6.8	1	NA	NA	8.2	NA	NA	NA	NA	NA	NA	NA	NA	NA	NA	NA	NA	NA	NA	NA	NA	NA	NA	NA	NA	NA	NA	NA	33	46	A Porphyry	TT150_12.1	South America	South America	Munoz et al 2012
6.8	0.8	NA	NA	6.2	NA	NA	NA	NA	NA	NA	NA	NA	NA	NA	NA	NA	NA	NA	NA	NA	NA	NA	NA	NA	NA	NA	NA	33	54	Central Diorite	TT90_11.1	South America	South America	Munoz et al 2012
6.8	0.6	NA	NA	7.4	NA	NA	NA	NA	652.1	NA	NA	0.074	14	0.288	3.5	5.06	1.41	22.6	6.2	68	24.6	98.2	22.3	166.2	36.7	2596.6	NA	62	76	A Porphyry	TT150_3.1	South America	South America	Munoz et al 2012
6.831637142	1.355150108	NA	156.7401787	11.71850285	NA	NA	NA	NA	1529.859835	NA	6.425144195	0.921319519	9.624677791	0.379581652	6.888222022	10.85044395	2.496379083	54.79130442	16.10576934	188.7275731	61.05596678	232.6147444	52.84142373	533.1633143	54.53827892	7582.394265	2.818647589	97.66270891	109.7367459	NA	13MFT-2 SPOT 320	North America	Western North America	Rivera et al 2016
6.951264388	0.911944562	NA	232.2614066	18.78014131	NA	NA	NA	NA	4059.165129	NA	17.82046999	2.39231692	21.56463295	1.166818507	17.41059555	32.03249209	4.552225433	163.3712867	49.40834116	519.7003856	165.6340125	604.5849068	124.4854697	1190.529778	138.3920817	7918.38118	5.041022379	376.7045819	239.8528839	NA	13MFT-2 SPOT 284	North America	Western North America	Rivera et al 2016
7	0.6	NA	NA	NA	NA	NA	NA	NA	NA	NA	NA	NA	NA	NA	NA	NA	NA	NA	NA	NA	NA	NA	NA	NA	NA	NA	NA	30	88	Central Diorite	TT90_7.1	South America	South America	Munoz et al 2012
7.812296338	4.026223206	NA	158.271844	23.82278811	NA	NA	NA	NA	1383.464279	NA	1.929899325	0.841835944	2.758576581	0.546270388	7.797875716	13.0857112	4.353458093	52.82851383	17.5386153	175.3504232	56.11747696	201.8174389	46.42715055	454.4561339	53.36144199	7070.144874	0.916756751	37.98168896	45.10867706	NA	13MFT-3 SPOT 444	North America	Western North America	Rivera et al 2016
7.997208761	5.47337138	NA	178.0979449	8.66461285	NA	NA	NA	NA	992.8464489	NA	12.897844	0.234507405	15.08289969	0.1188555	2.008107582	4.25822074	0.393569166	21.76789917	8.989220695	102.1983861	37.52060599	159.8247334	39.95974272	415.2961576	42.85110906	10494.72663	6.070712489	122.7818723	185.3385241	NA	13MFT-2 SPOT 385	North America	Western North America	Rivera et al 2016
8.240620145	3.764129429	NA	163.6343794	6.505105483	NA	NA	NA	NA	632.0791794	NA	5.116396122	2.366593372	10.83797756	0.589895341	3.507697686	3.32017953	0.405800596	14.44804002	5.372404123	69.83375226	24.25831814	95.52311111	22.0057486	229.2625589	29.0752298	9996.769343	2.309711013	38.1036647	56.55534825	NA	13MFT-2 SPOT 285	North America	Western North America	Rivera et al 2016
8.372158878	1.924912985	NA	165.5490965	7.615892733	NA	NA	NA	NA	697.4697552	NA	9.446899805	0.104931439	10.63360193	0.035397794	1.304449031	3.030242431	0.342897999	17.1865074	6.179792963	72.97315157	26.44862507	111.829369	27.20294762	290.0067979	31.28198354	8296.071543	3.624853345	80.58343668	134.5182869	NA	13MFT-3 SPOT 494	North America	Western North America	Rivera et al 2016
8.481336769	2.76121213	NA	143.772885	10.2219285	NA	NA	NA	NA	1180.138522	NA	4.950532054	3.345529166	12.40100442	0.668828081	6.735764559	7.8548279	1.252837933	36.35099526	12.07728147	135.880162	45.30913706	174.4809527	38.97505093	380.0852317	44.40399726	8949.876336	1.887392199	64.08179831	82.32101319	NA	13MFT-1 SPOT 336	North America	Western North America	Rivera et al 2016
8.554298315	1.709835412	NA	173.1779671	15.07792884	NA	NA	NA	NA	2289.536272	NA	8.065084189	1.134770141	10.7949908	0.705074996	10.69075808	20.35480627	3.095465167	87.04063374	27.75357762	302.6481328	92.4748509	342.0940334	75.65960072	737.4603865	81.76104165	8373.50726	2.793420822	137.5811537	130.5883455	NA	13MFT-2 SPOT 290	North America	Western North America	Rivera et al 2016
8.617499029	2.017171021	NA	128.99214	9.503258061	NA	NA	NA	NA	846.4097698	NA	6.222803985	3.889969935	9.408367393	1.012464212	8.058996007	6.303418332	1.075647691	26.77311148	8.511367892	102.448945	32.6990036	125.4812313	28.52855437	284.5908917	31.54888216	7718.831713	2.439770649	53.77576971	77.02249811	NA	13MFT-6 SPOT 288	North America	Western North America	Rivera et al 2016
8.775875516	3.855089448	NA	214.4700344	12.57079002	NA	NA	NA	NA	1866.858785	NA	5.601851541	4.184776187	16.53820194	1.17562235	11.45804932	12.52666856	1.862149194	59.18032524	19.35756496	216.3312295	72.18070265	272.8227894	59.05817932	575.2384422	66.13742297	9119.395821	2.470856484	128.2135872	137.3756057	NA	13MFT-5 SPOT 648	North America	Western North America	Rivera et al 2016
9	0.8	NA	NA	7.9	NA	NA	NA	NA	NA	NA	NA	NA	NA	NA	NA	NA	NA	NA	NA	NA	NA	NA	NA	NA	NA	NA	NA	148	185	Northern Diorite	TT102_6.1	South America	South America	Munoz et al 2012
9.232354984	5.493162694	NA	208.6733914	12.54251305	NA	NA	NA	NA	1015.343619	NA	16.85354759	2.345051786	22.00648511	1.014464084	4.443637709	4.124263766	0.373246676	24.32667122	9.29629467	125.1201015	44.00970097	169.4415442	43.37102909	476.0753313	42.14384684	8715.598913	5.937156666	150.2391316	249.2665078	NA	13MFT-2 SPOT 375	North America	Western North America	Rivera et al 2016
9.285787643	2.797416429	NA	172.1840455	31.72707628	NA	NA	NA	NA	2075.102804	NA	4.081095216	2.666561345	7.981478616	1.018682979	10.70166706	18.49908975	3.69489389	73.77880147	22.87269473	249.9437853	83.23450797	303.0422688	67.53684085	650.617408	76.38259086	9752.022267	1.993545389	86.22058685	83.04967368	NA	13MFT-3 SPOT 425	North America	Western North America	Rivera et al 2016
9.389019653	3.468821804	NA	107.9287156	11.79143927	NA	NA	NA	NA	1298.765695	NA	2.941047859	1.30782768	5.112299623	0.581232828	6.178293523	9.15074842	2.05993361	45.0713025	12.92969385	145.2001917	48.63811645	193.0826029	41.96027401	392.0365233	47.59645395	8290.646988	1.464467604	44.13469296	50.66684608	NA	13MFT-1 SPOT 326	North America	Western North America	Rivera et al 2016
9.881143317	12.71034259	NA	NA	NA	NA	NA	NA	NA	NA	NA	NA	NA	22.1998	NA	1.2	3.19995	1.47	13.912	4.6599888	52.426	23.399979	113.34	24.552	246.999962	56.2124	NA	NA	85	121	NA	199453 131d	Australia	Southern Australia	Barham et al 2019
9.8875713	16.46747978	NA	NA	NA	NA	NA	NA	NA	NA	NA	NA	NA	13.29968	0.6954	1.698	2.325	0.86235	14.9996	4.824	51.536	21.952	118.69998	28.152	296.12	68.9999954	NA	NA	78	124	NA	199453 117d	Australia	Southern Australia	Barham et al 2019
10	1.04	NA	NA	12.71	NA	NA	NA	0.217	801	NA	4.9	0.025	14.4	0.317	4.11	6.05	3.56	23.7	6.9	76.7	24.2	103	21.2	183	29.2	5465	2.25	37	39.7	NA	PBV1c.2.1	Asia	Russia	Sutherland et al 2016
10.00947991	2.965039653	NA	167.9843798	19.38834575	NA	NA	NA	NA	1152.273709	NA	5.069574203	6.433967864	13.11339617	1.581611082	11.01797839	9.500024918	1.501486051	39.90177435	11.9868162	135.1649938	46.03981359	170.949899	37.65855433	360.242374	45.01562014	9815.158252	1.895719371	55.63637413	67.02802853	NA	13MFT-4 SPOT 454	North America	Western North America	Rivera et al 2016
10.13016753	3.382433548	NA	131.169016	10.92209511	NA	NA	NA	NA	1175.346819	NA	4.375356281	1.390749768	7.483678541	0.382034694	4.699132648	8.10138087	1.286988347	36.15485752	11.81966962	135.8647577	47.25073272	176.1919157	40.14224365	387.2156285	47.51867928	9710.245988	2.031141622	60.24712409	68.21400795	NA	13MFT-2 SPOT 330	North America	Western North America	Rivera et al 2016
10.34373121	0.932822761	NA	333.6221637	7.273582091	NA	NA	NA	NA	1278.57723	NA	11.40792003	6.106314294	25.37882035	1.892240198	10.93868056	7.269271829	0.427917417	32.56746598	10.84845523	139.7079598	49.72787415	199.5710945	44.99050311	443.3265125	60.54609357	11927.53179	5.606437006	196.8915971	191.8831026	NA	13MFT-5 SPOT 630	North America	Western North America	Rivera et al 2016
10.6	0.44	NA	NA	7.94	NA	NA	NA	0.384	1431	NA	5.38	0.052	29.5	0.474	6.17	9.13	4.93	39.6	11.7	132.8	42.9	184	38	330	52.3	6653	2.65	114	94.4	NA	PBV1b.2.1	Asia	Russia	Sutherland et al 2016
10.68640032	3.241531135	NA	183.1574232	23.53350058	NA	NA	NA	NA	3784.973442	NA	9.308253182	3.272022682	11.74392201	1.638604533	20.44037646	33.04106745	6.961675474	160.4888558	45.88293436	469.1746508	153.3542453	565.9404569	115.1519809	982.0578491	122.8818477	7811.192391	2.78293592	208.9533012	139.727556	NA	13MFT-1 SPOT 327	North America	Western North America	Rivera et al 2016
10.90635329	0.656402317	NA	684.0691771	8.877790195	NA	NA	NA	NA	2505.124108	398709.9681	4.979581862	0.139457845	39.32021741	0.318869056	5.16856721	12.26533688	4.643169627	55.02431651	19.17376891	240.4631215	85.07325501	393.3540371	105.8056198	1291.248436	141.9544192	5605.817916	1.74295374	282.8980063	312.6940276	NA	C-03 L 95 1/31/2019 3:05:58 PM (Run: 1)	South America	South America	Obrist-Farner et al 2020
10.98571384	0.612013757	NA	414.8481195	2.149034974	NA	NA	NA	NA	1081.091395	377686.9218	4.819646694	NA	19.25874253	0.024044173	1.017775814	3.091498614	0.804076055	18.11277376	7.257422899	93.38780938	37.57720451	172.5755635	50.19214413	648.152317	69.87739177	6640.687722	1.962662587	145.4194114	322.7967543	NA	C-03 M 115 1/31/2019 3:57:35 PM (Run: 1)	South America	South America	Obrist-Farner et al 2020
11	2	NA	NA	0.39	NA	NA	NA	NA	252	482000	NA	NA	0.73	NA	0.07	NA	0.3	NA	NA	17.81	NA	NA	NA	NA	13.59	8230	NA	15.2	58.8	NA	7	Australia	Eastern Australia	Wong et al 2017
11.02383613	0.631341086	NA	340.9747409	3.236605604	NA	NA	NA	NA	1359.754806	380261.5139	12.51806616	2.090236211	38.53659766	0.465291304	3.434624245	3.646395652	1.010319564	20.62135877	8.411200295	115.5373424	46.98168021	225.2568856	66.0860243	833.1792055	96.23600318	6724.499393	4.152977007	153.1836289	334.2292073	NA	C-03 L 96 1/31/2019 3:08:05 PM (Run: 1)	South America	South America	Obrist-Farner et al 2020
11.06697832	0.526167179	NA	280.3887855	2.937331364	NA	NA	NA	NA	1020.534045	371269.0226	7.633034023	NA	32.3048724	0.029438051	1.287288776	3.011177428	0.915720896	18.52774482	7.316013857	94.99142073	37.36470578	161.9551417	44.19044594	560.0319894	61.23372361	6916.360263	2.650093484	323.7784574	488.3447447	NA	C-03 L 99 1/31/2019 3:14:27 PM (Run: 1)	South America	South America	Obrist-Farner et al 2020
11.1	1.04	NA	NA	8.3	NA	NA	NA	0.178	628	NA	4.48	0.014	11.4	0.247	3.52	5.13	2.87	19.1	5.42	59.8	18.9	79.8	16.3	141	22.7	5494	2.16	26.6	29.9	NA	PBV1c.5.1	Asia	Russia	Sutherland et al 2016
11.1	0.31	NA	NA	4.59	NA	NA	NA	0.732	2517	NA	18.7	0.019	153	0.43	7.16	13.2	6.76	60.3	19.5	233.4	77.6	347	73.1	634	104	8379	5.73	963	580	NA	PBV1a.3.1	Asia	Russia	Sutherland et al 2016
11.2	0.81	NA	NA	7.6	NA	NA	NA	0.229	890	NA	3.31	0.057	17	0.435	5.27	6.12	3.64	26	7.38	82.3	26.2	111	22.7	198	32.1	5401	1.85	42.8	43.2	NA	PBV1c.4.1	Asia	Russia	Sutherland et al 2016
11.25225016	0.496218908	NA	677.8891455	3.4246554	NA	NA	NA	NA	2692.534859	421311.8406	25.05500102	NA	31.49763831	0.104170363	1.896093448	6.782088219	1.287225932	42.14323426	18.37435777	242.0127284	94.16133609	423.4492972	117.2271203	1335.010059	156.09715	7720.383774	8.566045753	571.4229451	1201.190775	NA	C-03 L 93 1/31/2019 3:01:41 PM (Run: 1)	South America	South America	Obrist-Farner et al 2020
11.3	1.09	NA	NA	6.63	NA	NA	NA	0.208	759	NA	4.42	0.033	15.4	0.367	4.73	5.85	3.11	21.6	6.23	71	22.9	97.9	20.1	176	28.3	5753	2.25	35.4	38.8	NA	PBV1c.3.1	Asia	Russia	Sutherland et al 2016
11.4	0.37	NA	NA	9.23	NA	NA	NA	0.245	707	NA	4.3	0.013	21.7	0.134	2.03	3.63	2.25	16.3	5	59.8	20.6	95.1	21.2	197	33.9	5362	2.47	45	50.5	NA	PBV1b.1.1	Asia	Russia	Sutherland et al 2016
11.484196	0.626241497	NA	266.5010482	5.866200235	NA	NA	NA	NA	1645.998435	381705.5096	12.95703663	NA	43.66800142	0.071991279	1.580045844	4.40061474	1.52679844	22.44824252	10.08139133	144.3267974	57.90280715	278.2318129	81.20248085	1019.022344	113.9282635	6293.753041	3.819719522	219.6721171	399.6820198	NA	C-03 L 101 1/31/2019 3:23:15 PM (Run: 1)	South America	South America	Obrist-Farner et al 2020
11.51786353	12.34335713	NA	NA	NA	NA	NA	NA	NA	NA	NA	NA	NA	22.224	0.4944	0.36	1.38996	1.19997	9.694	3.5899812	59.95	29.2	173.1	44.5999932	493.999924	122.5999866	NA	NA	78	143	NA	199453 116d	Australia	Southern Australia	Barham et al 2019
11.52443962	0.817115854	NA	273.0950897	5.376711987	NA	NA	NA	NA	1018.093491	414682.3785	1.755013919	NA	14.6654532	0.114914808	2.632184393	5.539836531	1.96757215	22.28978987	7.736848491	95.07399149	36.30384116	166.8259362	46.19501035	551.5260021	69.41023887	6354.548418	0.840096904	106.4039993	147.8394658	NA	C-03 M 122 1/31/2019 4:16:57 PM (Run: 1)	South America	South America	Obrist-Farner et al 2020
11.52876847	0.703509938	NA	648.4960938	5.166387746	NA	NA	NA	NA	1737.417028	390889.8511	3.034529852	0.018460539	12.62092807	0.111030913	2.522168271	7.545743457	2.150175222	34.39924256	12.87005288	164.083325	62.11317543	272.0887524	77.67098513	956.059602	108.2543671	5566.379157	1.413441978	153.6624548	309.728703	NA	C-03 L 97 1/31/2019 3:10:12 PM (Run: 1)	South America	South America	Obrist-Farner et al 2020
11.54210115	1.132367475	NA	277.9579533	4.737355648	NA	NA	NA	NA	587.2203386	392977.5612	1.335491628	NA	8.812299761	0.036068971	0.751271962	1.685523157	0.765431663	11.10404315	3.662651277	50.18688409	18.95123691	94.26902785	29.03370486	389.9727182	47.26252265	5824.042956	0.584658123	53.33852529	102.6069041	NA	C-03 L 103 1/31/2019 3:27:30 PM (Run: 1)	South America	South America	Obrist-Farner et al 2020
11.59126632	0.447104193	NA	515.80405	6.039931835	NA	NA	NA	NA	3616.523936	427316.8741	15.85013999	0.065249033	65.25684721	0.640462582	9.532304001	19.20886921	4.688135034	91.95357732	33.51443547	386.3113344	136.0766377	560.6952183	144.6395809	1566.942407	178.8736006	6932.453334	4.65864196	1246.376794	946.9371754	NA	C-03 L 111 1/31/2019 3:49:02 PM (Run: 1)	South America	South America	Obrist-Farner et al 2020
11.59877313	0.802268046	NA	206.7568395	4.72012917	NA	NA	NA	NA	989.1943445	434003.11	5.842502902	NA	21.86190962	0.038784676	0.65148123	2.103712875	1.114240322	14.56023242	6.030697585	80.36094941	33.71807924	166.295695	46.88396982	596.4253847	75.31458998	7180.450235	1.941181805	108.4503028	186.6109543	NA	C-03 L 114 1/31/2019 3:55:23 PM (Run: 1)	South America	South America	Obrist-Farner et al 2020
11.6	0.79	NA	NA	7.9	NA	NA	NA	0.19	597	NA	3.3	0.012	27.5	0.119	1.74	3.13	1.95	13.9	4.26	50.7	17	77.1	16.5	150	25	5441	1.55	58.3	56.9	NA	PBV1c.1.1	Asia	Russia	Sutherland et al 2016
11.62574148	0.803389109	NA	484.0375564	5.162844699	NA	NA	NA	NA	2287.205679	400713.5602	10.98141445	NA	69.01104532	0.153745314	3.376159505	8.557326171	3.665993499	46.66691046	18.62469008	224.3959914	81.68150071	353.5218307	93.94866018	1091.053909	115.7172738	6348.795848	2.893526548	321.4313647	315.110005	NA	C-03 L 107 1/31/2019 3:35:59 PM (Run: 1)	South America	South America	Obrist-Farner et al 2020
11.78715725	0.725227735	NA	261.8461048	3.751078082	NA	NA	NA	NA	1205.803338	436309.7968	7.718829595	NA	33.0774842	0.039768076	1.455426302	3.771019735	1.013133303	18.77096355	7.845814967	103.6550433	41.52468956	191.3826987	53.07856299	638.5962134	79.14993785	7580.867231	2.950010586	252.2463662	337.4964203	NA	C-03 L 112 1/31/2019 3:51:09 PM (Run: 1)	South America	South America	Obrist-Farner et al 2020
11.79173648	0.579627547	NA	761.0119342	4.692642862	NA	NA	NA	NA	3301.85817	415601.5979	6.482339591	0.024724096	26.70801157	0.416368605	7.99031899	17.80169438	4.480616755	74.31122983	26.68718974	331.4571696	115.8699084	508.4517911	134.4226879	1528.563436	172.043562	6263.597973	1.893014835	381.8373432	547.1661918	NA	C-03 M 121 1/31/2019 4:14:50 PM (Run: 1)	South America	South America	Obrist-Farner et al 2020
11.79865583	0.677563178	NA	206.836007	14.56152171	NA	NA	NA	NA	1268.217812	417497.8829	0.633847497	0.025891567	8.31216394	0.179083552	4.913098931	9.061355565	2.796108034	37.55521924	12.74002192	139.3098333	46.84999797	190.1662804	49.30848177	552.4611231	58.62861345	6266.736531	0.46440908	282.5646601	438.2913677	NA	C-03 L 108 1/31/2019 3:38:06 PM (Run: 1)	South America	South America	Obrist-Farner et al 2020
11.80599941	0.862205649	NA	241.7667365	3.860173369	NA	NA	NA	NA	914.4941095	373307.6399	2.518303927	0.248784822	18.56430185	0.200020403	2.328486531	4.379835915	1.629630376	19.75500793	7.354573452	87.82224001	32.5386735	145.5793288	42.18838094	530.7451328	55.96301284	5968.92373	0.921735012	119.447617	184.0028993	NA	C-03 M 116 1/31/2019 3:59:43 PM (Run: 1)	South America	South America	Obrist-Farner et al 2020
11.8085369	0.644510936	NA	268.8344325	3.993051243	NA	NA	NA	NA	1164.462696	377578.7075	1.877323461	1.177686154	22.79810842	0.438654616	3.938837235	6.237196535	2.305207204	29.28615382	9.808561811	111.632802	41.43087329	176.2420967	50.59114342	633.0141066	66.87914074	6322.320749	0.866888065	138.0064931	180.1962144	NA	C-03 L 104 1/31/2019 3:29:37 PM (Run: 1)	South America	South America	Obrist-Farner et al 2020
11.83256691	0.636894835	NA	432.7000756	7.928941706	NA	NA	NA	NA	2142.665899	377096.4465	2.492605527	0.033836628	15.87246775	0.470024228	10.38659729	17.51627813	6.440203117	66.79899622	21.63294107	241.5406821	79.7849929	326.8336811	89.03477988	1007.56264	106.9648531	5213.031916	0.920189148	189.0738414	249.5278551	NA	C-03 M 117 1/31/2019 4:01:50 PM (Run: 1)	South America	South America	Obrist-Farner et al 2020
11.86834868	10.75823156	NA	NA	NA	NA	NA	NA	NA	NA	NA	NA	NA	8.3772	0.5948	1.3398	3.42	0.47325	19.511	6.799914	77.699888	27.792	133.99995	28.368	255.99992	5.899989	NA	NA	128	212	NA	199453 11d	Australia	Southern Australia	Barham et al 2019
11.9	0.52	NA	NA	7.5	NA	NA	NA	0.322	1235	NA	6.38	0.053	20.4	0.436	5.26	7.84	4.49	35.7	10.5	117.8	37.6	159	32.5	282	44.7	6091	3.01	77	68.7	NA	PBV1b.3.1	Asia	Russia	Sutherland et al 2016
12	3	NA	NA	0.33	NA	NA	NA	NA	135	480000	NA	NA	0.46	NA	0.02	NA	0.16	NA	NA	9.19	NA	NA	NA	NA	5.49	8480	NA	6.6	25.6	NA	5	Australia	Eastern Australia	Wong et al 2017
12	2	NA	NA	0.47	NA	NA	NA	NA	199	449000	NA	NA	0.49	NA	0.05	NA	0.24	NA	NA	13.38	NA	NA	NA	NA	10.15	7800	NA	9.8	39.9	NA	2	Australia	Eastern Australia	Wong et al 2017
12	2	NA	13	0.25	NA	NA	NA	NA	193	493000	NA	NA	0.41	NA	0.03	NA	0.17	NA	NA	13.06	NA	NA	NA	NA	8.48	8620	NA	10.8	36.4	NA	12	Australia	Eastern Australia	Wong et al 2017
12	2	NA	NA	0.61	NA	NA	NA	NA	282	458000	NA	NA	1.31	NA	0.15	NA	0.38	NA	NA	23.4	NA	NA	NA	NA	11.96	7980	NA	25.1	63.8	NA	4	Australia	Eastern Australia	Wong et al 2017
12	1	NA	1	0.38	NA	NA	NA	NA	257	487000	NA	NA	0.88	NA	0.07	NA	0.37	NA	NA	20.55	NA	NA	NA	NA	10.03	8720	NA	48.1	111.7	NA	3	Australia	Eastern Australia	Wong et al 2017
12.02613802	0.530075249	NA	890.5107092	4.78055013	NA	NA	NA	NA	4648.687358	395491.1444	9.793367248	0.059105558	47.13285188	0.86502659	16.28359201	29.45880592	7.546777091	125.4526099	40.83663181	493.8462219	168.4016169	678.7679203	180.1023341	2042.003315	209.3907313	5990.424434	2.57743281	608.4586309	749.4050908	NA	C-03 L 105 1/31/2019 3:31:45 PM (Run: 1)	South America	South America	Obrist-Farner et al 2020
12.03277815	0.671229441	NA	329.4907847	5.890394125	NA	NA	NA	NA	2013.306808	427011.7415	11.28330009	NA	45.06630302	0.089637358	1.767529681	5.005100147	1.903004493	29.80904447	12.76287285	173.7684773	68.56937783	320.1370021	87.59507496	1066.875611	131.0233304	7055.23246	3.108761848	281.679924	391.3825455	NA	C-03 L 113 1/31/2019 3:53:16 PM (Run: 1)	South America	South America	Obrist-Farner et al 2020
12.1	0.9	NA	NA	0.52	NA	NA	NA	0.09	732	NA	5.87	0.01	3.17	NA	0.4	1.23	1.17	9.27	4.63	67.1	25.8	126	29.7	358	51.1	7819	2.14	53.2	161	NA	SHAG1-7	Zealandia	New Zealand	van der Meer et al 2019
12.14933706	5.761610772	NA	140.9747341	9.842672631	NA	NA	NA	NA	754.8301436	NA	3.57019924	2.219822942	7.516345302	0.500605249	5.483809946	5.322633907	0.642462881	20.29465025	7.63320093	88.93431745	27.96765624	116.6323942	26.4146703	261.4937486	32.22562245	9021.425961	1.38363856	34.0690556	47.11786024	NA	13MFT-4 SPOT 453	North America	Western North America	Rivera et al 2016
12.3	0.9	NA	NA	0.89	NA	NA	NA	0.09	833	NA	3.88	NA	2.31	NA	0.38	1.29	1.27	10	4.93	72	28.4	149	36.5	446	73.2	6165	1.46	67.9	161	NA	SHAG1-1	Zealandia	New Zealand	van der Meer et al 2019
12.31971191	3.966344252	NA	133.0354033	8.556023083	NA	NA	NA	NA	721.923955	NA	3.469605713	0.513063337	6.394686027	0.068786168	2.08329325	4.729537613	0.584618252	17.14634748	7.144943937	76.3004423	28.49820468	115.5673459	27.49948895	278.6788316	31.779672	8932.383563	1.835725721	44.77410206	72.60475878	NA	13MFT-2 SPOT 297	North America	Western North America	Rivera et al 2016
12.32639887	16.49672752	NA	NA	NA	NA	NA	NA	NA	NA	NA	NA	NA	9.599848	0.852	0.54	1.1994	0.49983	6.199942	2.199984	25.8	1.168	51.49998	11.7299988	127.19998	28.162	NA	NA	26.9	48	NA	199453 64d	Australia	Southern Australia	Barham et al 2019
12.39384719	12.35906563	NA	NA	NA	NA	NA	NA	NA	NA	NA	NA	27.79987	67.168	6.836	24.1998	6.84	1.458	13.764	4.19178	5.16	19.21182	91.89999	21.114	213.69	48.816	NA	NA	117	152	NA	199453 143d	Australia	Southern Australia	Barham et al 2019
12.41688749	0.705723991	NA	297.0637245	8.818187744	NA	NA	NA	NA	1053.691055	419060.5582	2.277264814	0.160260417	12.80268657	0.100490272	1.785807619	3.672104102	0.692042089	20.16914808	7.44555803	97.55990765	36.12734512	169.4893575	45.86494729	526.7705673	62.19862539	7119.814026	1.468289339	232.5382938	609.3473021	NA	C-03 L 94 1/31/2019 3:03:50 PM (Run: 1)	South America	South America	Obrist-Farner et al 2020
12.45717545	13.5386961	NA	161.9584724	12.62785072	NA	NA	NA	NA	1990.985982	NA	2.74089803	11.13919743	14.06602605	4.095701816	23.13871562	21.3265295	2.881494829	80.80618276	23.26714872	237.6178826	77.35860132	293.3898984	64.26755222	618.253537	64.54920689	6386.428486	1.486219348	93.39105291	96.54025974	NA	13MFT-4 SPOT 495	North America	Western North America	Rivera et al 2016
12.4650332	0.601587318	NA	235.6636513	6.235796204	NA	NA	NA	NA	1439.036987	439071.9553	7.725006116	NA	39.65961021	0.046776771	1.774315653	4.108365127	1.735461847	27.11488323	9.996191775	134.249808	50.90984127	224.6217424	63.977309	736.014639	92.12022216	7436.956492	2.724533304	505.9408251	412.9960391	NA	C-03 L 91 1/31/2019 2:57:25 PM (Run: 1)	South America	South America	Obrist-Farner et al 2020
12.92221291	5.452764422	NA	NA	NA	NA	NA	NA	NA	NA	NA	NA	0.3315	1.87972	0.199958	1.182	1.245	0.2599695	6.199942	2.45112	27.399946	12.94114	71.85	19.836	198.399938	46.4999878	NA	NA	119	217	NA	199453 159d	Australia	Southern Australia	Barham et al 2019
12.96197168	11.59593683	NA	NA	NA	NA	NA	NA	NA	NA	NA	NA	NA	7.86992	0.7198	1.32	1.98	0.555	11.914	3.3599964	39.39992	14.659984	71.49996	15.3468	146.939	3.1999936	NA	NA	51.9	61.6	NA	199453 58d	Australia	Southern Australia	Barham et al 2019
13	2	NA	14	0.24	NA	NA	NA	NA	195	487000	NA	NA	0.29	NA	0.01	NA	0.23	NA	NA	14.26	NA	NA	NA	NA	8.07	8820	NA	9.2	32.9	NA	16	Australia	Eastern Australia	Wong et al 2017
13	2	NA	NA	0.64	NA	NA	NA	NA	212	501000	NA	NA	0.52	NA	0.01	NA	0.23	NA	NA	14.01	NA	NA	NA	NA	12.16	9240	NA	11.4	41.5	NA	9	Australia	Eastern Australia	Wong et al 2017
13	2	NA	28	0.57	NA	NA	NA	NA	365	489000	NA	NA	0.82	NA	0.16	NA	0.54	NA	NA	31.66	NA	NA	NA	NA	12.58	6970	NA	12.1	46.7	NA	21	Australia	Eastern Australia	Wong et al 2017
13	2	NA	21	0.21	NA	NA	NA	NA	81	493000	NA	NA	0.1	NA	0.01	NA	0.09	NA	NA	3.65	NA	NA	NA	NA	2.86	10030	NA	15.8	71.3	NA	35	Australia	Eastern Australia	Wong et al 2017
13	2	NA	NA	0.47	NA	NA	NA	NA	217	490000	NA	NA	0.64	NA	0.02	NA	0.27	NA	NA	16.52	NA	NA	NA	NA	8.85	8350	NA	18.6	57.2	NA	6	Australia	Eastern Australia	Wong et al 2017
13	1	NA	14	0.21	NA	NA	NA	NA	95	498000	NA	NA	0.14	NA	0.01	NA	0.09	NA	NA	5.22	NA	NA	NA	NA	3.66	11480	NA	26.3	125.8	NA	38	Australia	Eastern Australia	Wong et al 2017
13	2	NA	NA	0.54	NA	NA	NA	NA	278	503000	NA	NA	0.92	NA	0.14	NA	0.65	NA	NA	25.78	NA	NA	NA	NA	11.86	8820	NA	31.6	66.9	NA	10	Australia	Eastern Australia	Wong et al 2017
13	1	NA	27	0.6	NA	NA	NA	NA	201	482000	NA	NA	0.18	NA	0.01	NA	0.15	NA	NA	13.8	NA	NA	NA	NA	10.07	8670	NA	39.7	196	NA	34	Australia	Eastern Australia	Wong et al 2017
13	1	NA	NA	0.69	NA	NA	NA	NA	299	502000	NA	NA	0.94	NA	0.03	NA	0.43	NA	NA	24.4	NA	NA	NA	NA	12.51	9420	NA	41.6	102.1	NA	8	Australia	Eastern Australia	Wong et al 2017
13	1	NA	13	0.54	NA	NA	NA	NA	311	492000	NA	NA	1.07	NA	0.08	NA	0.5	NA	NA	27.5	NA	NA	NA	NA	11.23	8730	NA	91.3	150.7	NA	13	Australia	Eastern Australia	Wong et al 2017
13	1	NA	33	0.24	NA	NA	NA	NA	169	485000	NA	NA	0.47	NA	0.11	NA	0.43	NA	NA	15.57	NA	NA	NA	NA	6.17	10360	NA	176.3	459	NA	31	Australia	Eastern Australia	Wong et al 2017
13.2	0.5	NA	NA	2.03	NA	NA	NA	0.07	1456	NA	11	0.003	17.9	NA	4.51	10	7.74	47.9	15.8	176.9	54.7	207.4	37.5	339	44.4	4451	2.74	144	215	NA	CAM2-6	Zealandia	New Zealand	van der Meer et al 2019
13.3	1.8	NA	NA	0.45	NA	NA	NA	0.1	317.9	NA	2.8	NA	0.3	NA	0.3	0.7	0.7	4.4	2	28	11.5	59.4	15.4	199	34	4792	1.38	44.3	112	NA	SHAG9-2	Zealandia	New Zealand	van der Meer et al 2019
13.5	2.9	NA	NA	1.11	NA	NA	NA	0.08	546	NA	3.06	NA	1.55	NA	0.17	0.88	0.79	6.32	3.26	49.7	19.4	97.9	24.4	307	45	6602	1.25	33.3	101	NA	SHAG1-6	Zealandia	New Zealand	van der Meer et al 2019
13.9	1.6	NA	NA	0.69	NA	NA	NA	0	159	NA	0.9	NA	0.3	NA	0.1	0.2	0.3	2.1	0.9	13.5	6	31	8.2	126	19.2	4676	0.5	15.8	51.8	NA	SHAG6-4	Zealandia	New Zealand	van der Meer et al 2019
14	3	NA	NA	0.51	NA	NA	NA	NA	189	454000	NA	NA	0.45	NA	0.02	NA	0.23	NA	NA	13.67	NA	NA	NA	NA	8.06	7680	NA	7.3	31.4	NA	1	Australia	Eastern Australia	Wong et al 2017
14	2	NA	30	0.39	NA	NA	NA	NA	273	5.00E+05	NA	NA	0.63	NA	0.08	NA	0.41	NA	NA	22.2	NA	NA	NA	NA	9.01	6760	NA	7.3	37.21	NA	27	Australia	Eastern Australia	Wong et al 2017
14	3	NA	24	0.2	NA	NA	NA	NA	181	497000	NA	NA	0.35	NA	0.05	NA	0.18	NA	NA	13.3	NA	NA	NA	NA	7.42	9270	NA	8.3	30.6	NA	15	Australia	Eastern Australia	Wong et al 2017
14	2	NA	25	0.04	NA	NA	NA	NA	60	509000	NA	NA	0.09	NA	0.01	NA	0.03	NA	NA	1.5	NA	NA	NA	NA	1.38	10910	NA	9.3	44.5	NA	33	Australia	Eastern Australia	Wong et al 2017
14	0.7	NA	NA	2.22	NA	NA	NA	0.04	419	NA	2.84	NA	1.91	NA	0.58	1.54	1.26	8.75	3.52	44.1	15.1	63.3	11.6	126	14.4	5256	0.94	12	48.2	NA	CAM3-9	Zealandia	New Zealand	van der Meer et al 2019
14	2	NA	NA	0.06	NA	NA	NA	NA	83	5.00E+05	NA	NA	0.14	NA	0.02	NA	0.07	NA	NA	4.03	NA	NA	NA	NA	3.12	10690	NA	17.3	77	NA	39	Australia	Eastern Australia	Wong et al 2017
14	2	NA	22	0.48	NA	NA	NA	NA	344	5.00E+05	NA	NA	0.65	NA	0.08	NA	0.3	NA	NA	25.97	NA	NA	NA	NA	14.28	8640	NA	17.7	63	NA	14	Australia	Eastern Australia	Wong et al 2017
14	2	NA	NA	0.28	NA	NA	NA	NA	84	501000	NA	NA	0.12	NA	0	NA	0.09	NA	NA	3.83	NA	NA	NA	NA	3.34	10930	NA	17.7	80.3	NA	40	Australia	Eastern Australia	Wong et al 2017
14	1.4	NA	NA	0.63	NA	NA	NA	0.05	638	NA	3	0.01	4.49	NA	1.11	2.76	2.39	15.4	5.8	70.5	23.5	96.7	18.8	198	25.8	5146	1.08	24.3	76.5	NA	CAM2-1	Zealandia	New Zealand	van der Meer et al 2019
14	2	NA	3	0.43	NA	NA	NA	NA	316	498000	NA	NA	0.99	NA	0.09	NA	0.58	NA	NA	29.1	NA	NA	NA	NA	9.99	6750	NA	28.9	82	NA	28	Australia	Eastern Australia	Wong et al 2017
14	2	NA	NA	0.6	NA	NA	NA	NA	316	497000	NA	NA	0.87	NA	0.08	NA	0.44	NA	NA	26.86	NA	NA	NA	NA	12.32	8510	NA	32.1	81.1	NA	11	Australia	Eastern Australia	Wong et al 2017
14	1	NA	9	0.28	NA	NA	NA	NA	108	492000	NA	NA	0.22	NA	0.02	NA	0.15	NA	NA	6.94	NA	NA	NA	NA	4.39	10910	NA	35.8	155.5	NA	37	Australia	Eastern Australia	Wong et al 2017
14	2	NA	19	0.08	NA	NA	NA	NA	250	499000	NA	NA	0.63	NA	0.09	NA	0.25	NA	NA	19.8	NA	NA	NA	NA	9.58	8930	NA	37.7	84.5	NA	17	Australia	Eastern Australia	Wong et al 2017
14	2	NA	NA	0.27	NA	NA	NA	NA	406	484000	NA	NA	1.47	NA	0.25	NA	0.79	NA	NA	39.1	NA	NA	NA	NA	12.6	6490	NA	46.8	107.6	NA	25	Australia	Eastern Australia	Wong et al 2017
14	0.5	NA	NA	2.29	NA	NA	NA	2.1	473	NA	8.74	0.3	5.3	NA	2.23	3.28	2.49	14.1	4.65	54.8	17.8	74	15.3	194	22.5	6874	3.65	68.2	247	NA	CAM1-1	Zealandia	New Zealand	van der Meer et al 2019
14	1	NA	NA	0.18	NA	NA	NA	NA	277	495000	NA	NA	0.84	NA	0.07	NA	0.41	NA	NA	22.51	NA	NA	NA	NA	10.46	8780	NA	68.9	127.1	NA	18	Australia	Eastern Australia	Wong et al 2017
14	1	NA	28	0.05	NA	NA	NA	NA	172	496000	NA	NA	0.43	NA	0.09	NA	0.51	NA	NA	15.09	NA	NA	NA	NA	6.45	9600	NA	115.6	293.6	NA	32	Australia	Eastern Australia	Wong et al 2017
14	1	NA	NA	0.5	NA	NA	NA	NA	210	495000	NA	NA	0.5	NA	0.11	NA	0.39	NA	NA	17.04	NA	NA	NA	NA	8.74	10520	NA	137.4	389	NA	36	Australia	Eastern Australia	Wong et al 2017
14.21656122	0.719122257	NA	381.4919348	NA	NA	NA	NA	NA	1903.041872	NA	NA	NA	48.48698457	NA	NA	11.51961512	0.786410623	NA	NA	198.5387931	NA	NA	NA	NA	91.45531525	NA	NA	467.1988422	297.8391962	NA	yoshi\081217\mss-022	North America	Eastern US	Zhu et al 2020
14.3	2.8	NA	NA	0.73	NA	NA	NA	0	114.1	NA	1.4	NA	0.3	NA	0	0.2	0.2	1.3	0.7	10.1	4	21.3	5.6	93	12.2	4845	0.66	9.37	32.6	NA	SHAG6-2	Zealandia	New Zealand	van der Meer et al 2019
14.4	0.6	NA	NA	1.45	NA	NA	NA	0.1	1029	NA	10.7	0.002	1.9	NA	0.9	2.8	2.3	17.7	7.4	98.2	37.6	179.3	43.7	480	81.2	5378	3.18	365	423	NA	SHAG9-7	Zealandia	New Zealand	van der Meer et al 2019
14.72754134	15.69595058	NA	NA	NA	NA	NA	NA	NA	NA	NA	NA	NA	17.824	NA	0.1398	1.71	0.3123	9.299913	3.5523	44.79986	18.99992	96.9999	2.412	223.74	49.6999916	NA	NA	8	96	NA	199453 38d	Australia	Southern Australia	Barham et al 2019
14.75311228	31.30776264	NA	NA	NA	NA	NA	NA	NA	NA	NA	NA	NA	4.599944	0.143	NA	0.539955	0.2399775	3.299919	1.2199812	15.938	6.599918	34.62	8.5999968	89.999998	2.6999954	NA	NA	1.9	21.1	NA	199453 12d	Australia	Southern Australia	Barham et al 2019
14.8	0.7	NA	NA	0.14	NA	NA	NA	0	213.7	NA	0.7	NA	0.3	NA	0.1	0.4	0.3	2.8	1.3	19	7.9	39.5	9.9	135	20.5	4456	0.34	5.8	23.3	NA	SHAG7-3	Zealandia	New Zealand	van der Meer et al 2019
14.83242484	8.24459488	NA	NA	NA	NA	NA	NA	NA	NA	NA	NA	NA	32.19968	NA	0.672	1.575	1.22265	16.39988	5.799936	74.29989	32.62	168.96	39.3999876	422.99997	95.5158	NA	NA	213	341	NA	199453 39d	Australia	Southern Australia	Barham et al 2019
15	1	NA	19	0.36	NA	NA	NA	NA	211	499000	NA	NA	0.39	NA	0.04	NA	0.28	NA	NA	17.03	NA	NA	NA	NA	6.5	6650	NA	4	22.23	NA	30	Australia	Eastern Australia	Wong et al 2017
15	2	NA	6	0.53	NA	NA	NA	NA	388	480000	NA	NA	1.06	NA	0.18	NA	0.78	NA	NA	36.3	NA	NA	NA	NA	11.49	6150	NA	19.8	68.4	NA	23	Australia	Eastern Australia	Wong et al 2017
15	2	NA	26	0.46	NA	NA	NA	NA	196	501000	NA	NA	0.52	NA	0.02	NA	0.23	NA	NA	13.71	NA	NA	NA	NA	7.47	9020	NA	25.9	67.9	NA	19	Australia	Eastern Australia	Wong et al 2017
15	2	NA	29	0.31	NA	NA	NA	NA	356	502000	NA	NA	0.93	NA	0.12	NA	0.46	NA	NA	30.3	NA	NA	NA	NA	14.32	8310	NA	34.6	86.4	NA	20	Australia	Eastern Australia	Wong et al 2017
15	2	NA	1	0.45	NA	NA	NA	NA	387	493000	NA	NA	1.29	NA	0.2	NA	0.78	NA	NA	38.8	NA	NA	NA	NA	11.26	6230	NA	41.6	107.9	NA	24	Australia	Eastern Australia	Wong et al 2017
15.1	1.1	NA	NA	0.73	NA	NA	NA	0.1	220.1	NA	1.3	0.002	0.4	NA	0.1	0.4	0.4	2.5	1.3	18.3	7.9	42.2	11.1	158	25.2	4665	0.69	31.6	82.2	NA	SHAG6-7	Zealandia	New Zealand	van der Meer et al 2019
15.1	0.5	NA	NA	0.9	NA	NA	NA	0.12	251.8	NA	3.8	0.01	2.58	NA	0.91	1.28	0.94	5.77	2.07	25.5	9.28	45.9	10.5	148	19	7354	2.16	51.8	233	NA	CAM1-11	Zealandia	New Zealand	van der Meer et al 2019
15.2	1.6	NA	NA	0.1	NA	NA	NA	0	372.7	NA	2	0.004	0.7	NA	0.3	0.9	0.8	5.9	2.5	35.9	13.9	67	15.9	195	30.5	4954	0.76	20	55.1	NA	SHAG7-8	Zealandia	New Zealand	van der Meer et al 2019
15.46860613	3.533853225	NA	222.7417322	12.13476594	NA	NA	NA	NA	3595.513023	NA	16.8620869	0.665196101	24.7096259	1.096243451	17.38588119	30.34855236	4.153295392	132.0581439	41.69352474	431.8839458	139.8692886	518.3253598	108.6597719	985.0094277	115.9814562	8014.593993	4.71427234	309.1964641	200.9691029	NA	13MFT-4 SPOT 444	North America	Western North America	Rivera et al 2016
15.5	0.9	NA	NA	NA	NA	NA	NA	0	248.3	NA	1.7	0.004	0.3	NA	0.3	0.7	0.6	4.1	1.7	23.1	9.2	45.6	11.6	152	24.6	4457	0.9	29.9	67.6	NA	SHAG9-1	Zealandia	New Zealand	van der Meer et al 2019
15.81537832	106.5142758	NA	NA	NA	NA	NA	NA	NA	NA	NA	NA	0.1412	21.1112	0.15714	1.65	1.9125	0.46365	9.399887	3.192	4.99948	15.4999686	76.19997	17.172	162.8	34.2999874	NA	NA	82	19	NA	199453 3d	Australia	Southern Australia	Barham et al 2019
15.9	1.2	NA	NA	2.51	NA	NA	NA	0.03	427	NA	3.02	0.01	2.7	NA	0.73	1.88	1.61	11.3	4.12	50.5	16.3	63.9	11.5	126	13.9	5683	1.08	33	85.8	NA	CAM3-1	Zealandia	New Zealand	van der Meer et al 2019
16	3	NA	6	0.68	NA	NA	NA	NA	228	497000	NA	NA	0.44	NA	0.08	NA	0.35	NA	NA	17.69	NA	NA	NA	NA	7.5	6410	NA	6	29.74	NA	29	Australia	Eastern Australia	Wong et al 2017
16	0.8	NA	NA	NA	NA	NA	NA	0.1	434.7	NA	2.7	NA	2.1	NA	0.5	1.1	1	5.9	2.6	37.1	14.9	71.6	16.4	190	29.9	4330	1.11	18	74.9	NA	SHAG11-6	Zealandia	New Zealand	van der Meer et al 2019
16	2	NA	13	0.66	NA	NA	NA	NA	469	495000	NA	NA	1.33	NA	0.15	NA	0.96	NA	NA	46.4	NA	NA	NA	NA	14.24	6580	NA	25.4	78.3	NA	26	Australia	Eastern Australia	Wong et al 2017
16.1	1.3	NA	NA	0.19	NA	NA	NA	0.1	366	NA	1.6	0.004	2.3	NA	0.5	1.1	1	6.2	2.5	33.3	12.7	59.4	13.2	157	23.9	4601	0.75	37.6	103	NA	SHAG11-1	Zealandia	New Zealand	van der Meer et al 2019
16.11413659	13.3159518	NA	NA	NA	NA	NA	NA	NA	NA	NA	NA	NA	19.12	0.5996	1.68	2.79915	0.9199995	2.99954	5.3699934	69.254	23.3334	111.99993	24.7999968	232.32	46.984	NA	NA	151	228	NA	199453 88d	Australia	Southern Australia	Barham et al 2019
16.13328968	11.45831674	NA	NA	NA	NA	NA	NA	NA	NA	NA	NA	NA	12.914	0.12968	1.3998	3.75	NA	14.911	5.91216	72.699872	27.3114	133.99995	27.3132	275.999966	52.599988	NA	NA	152	266	NA	199453 41d	Australia	Southern Australia	Barham et al 2019
16.3	0.5	NA	NA	NA	NA	NA	NA	0.1	722.1	NA	2.7	NA	4.1	NA	0.8	2	1.9	12	5.3	67.7	25	111.6	24.6	263	39.5	4862	1.12	48.2	137	NA	SHAG10-8	Zealandia	New Zealand	van der Meer et al 2019
16.6	1	NA	NA	NA	NA	NA	NA	0.1	711.5	NA	3	0.01	4.1	NA	0.7	2	1.8	11.1	5	66.4	24.7	111.1	24.9	269	39.5	5013	1.27	49.9	147	NA	SHAG10-7	Zealandia	New Zealand	van der Meer et al 2019
16.6	0.3	NA	NA	0.35	NA	NA	NA	0.08	1032	NA	8.8	NA	10.7	NA	1.84	4.43	3.78	22.2	8.57	106	36.3	151	30.5	314	42.2	5354	2.81	264	401	NA	SHAG4-7	Zealandia	New Zealand	van der Meer et al 2019
16.9	0.6	NA	NA	0.27	NA	NA	NA	0.09	1083	NA	8.41	0.01	11.3	NA	1.76	4.59	3.97	23.8	9.18	113	37.7	158	32.2	325	42.3	5364	2.8	236	391	NA	SHAG4-4	Zealandia	New Zealand	van der Meer et al 2019
17.3	0.9	NA	NA	0.75	NA	NA	NA	0	374.9	NA	2.2	0.004	1.8	NA	0.4	0.9	0.8	5.2	2.3	31.7	12.4	60.1	13.9	169	25.8	4820	0.93	14.9	62.4	NA	SHAG11-8	Zealandia	New Zealand	van der Meer et al 2019
17.3	0.8	NA	NA	NA	NA	NA	NA	0	540.3	NA	1.9	0.002	2.9	NA	0.5	1.4	1.3	8.7	3.8	50.1	19	86.3	19.2	214	31.4	4718	0.91	31.2	101	NA	SHAG10-4	Zealandia	New Zealand	van der Meer et al 2019
17.39713829	12.27102554	NA	NA	NA	NA	NA	NA	NA	NA	NA	NA	0.4991	52.999952	0.23244	3.42	4.299945	0.555	2.683	8.999964	96.114	36.1348	187.99998	37.188	368.99995	68.67	NA	NA	197	17	NA	199453 137d	Australia	Southern Australia	Barham et al 2019
17.47250212	6.623722591	NA	167.5066118	13.62763544	NA	NA	NA	NA	1715.682524	NA	9.859288682	2.629082009	9.263150459	0.901324547	7.85130077	13.83589542	2.321288769	47.57721973	17.34098647	189.8565287	63.62720123	245.4680931	55.77337778	517.5206755	62.99163476	7807.687483	2.125172612	114.7220739	106.7542938	NA	13MFT-3 SPOT 431	North America	Western North America	Rivera et al 2016
17.8	3.4	NA	NA	12.7	NA	NA	NA	0.04	75.3	NA	0.95	0.002	0.91	NA	0.19	0.44	0.33	2.24	0.76	8.57	2.87	11.4	2.24	46.5	3.28	4815	0.58	4.54	12.7	NA	SHAG3-3	Zealandia	New Zealand	van der Meer et al 2019
17.9	0.7	NA	NA	0.14	NA	NA	NA	0.19	1965	NA	29.5	0.02	5.25	NA	1.91	6.54	6.25	37.7	15.8	197	65.6	274	58.3	628	79.2	10530	14.6	514	1152	NA	SHAG4-1	Zealandia	New Zealand	van der Meer et al 2019
18.32893819	7.993145744	NA	117.6001288	17.47480159	NA	NA	NA	NA	477.7969289	NA	6.974649438	1.539981182	8.089379868	0.358349034	2.191594972	2.920597017	0.407380777	12.36699087	4.22327849	54.33242852	19.21703071	79.65725687	19.42954604	210.6046465	22.26699201	8298.127387	2.937920394	32.02162792	67.61978323	NA	13MFT-6 SPOT 293	North America	Western North America	Rivera et al 2016
18.4	0.2	NA	NA	0.24	NA	NA	NA	0.1	3115	NA	18.8	0.03	56.3	NA	11.5	24.8	19.7	118	39.3	384.8	113	375.5	62.9	471	61.3	4434	4.07	557.8	532.9	NA	SHAG8-4	Zealandia	New Zealand	van der Meer et al 2019
18.6	0.7	NA	NA	0.52	NA	NA	NA	0.1	3403	NA	19.7	0.03	61.2	NA	12	27.8	21.5	129.2	41.8	428.4	123.1	410.6	67.9	523	63.5	4572	4.2	583	569.5	NA	SHAG8-7	Zealandia	New Zealand	van der Meer et al 2019
18.9	0.6	NA	NA	0.23	NA	NA	NA	0.11	1509	NA	7.13	0.002	13.2	NA	1.57	5.22	4.81	32.4	13.4	170	56.6	228	42.9	396	50.9	4455	2.21	111	263	NA	SHAG2-1	Zealandia	New Zealand	van der Meer et al 2019
18.9	0.8	NA	NA	0.31	NA	NA	NA	0.1	2312	NA	12.4	0.01	36.4	NA	5.4	14.7	11.9	71.9	25.6	273.5	80.3	283.9	48.3	394	48.8	4649	3.18	252.1	356.8	NA	SHAG8-1	Zealandia	New Zealand	van der Meer et al 2019
18.9	0.5	NA	NA	1.62	NA	NA	NA	0.2	2651	NA	26.7	0.02	69.9	NA	5.8	16.3	13.7	83.5	30.2	332.7	96.8	342.3	59.7	506	53.4	5977	7.24	749.5	867	NA	SHAG5-4	Zealandia	New Zealand	van der Meer et al 2019
19.4	0.5	NA	NA	0.31	NA	NA	NA	0.3	2852	NA	25.8	0.1	71.4	NA	6.4	16.3	13.6	85.9	31.7	343	97.4	327.7	54.9	456	46.3	6723	7.17	617.3	871	NA	SHAG5-1	Zealandia	New Zealand	van der Meer et al 2019
19.5	0.6	NA	NA	0.98	NA	NA	NA	0.11	1565	NA	7.58	0.004	14.1	NA	1.64	5.13	4.75	32.1	13.4	166	56.3	227	43	400	51.1	4428	2.38	117	288	NA	SHAG2-4	Zealandia	New Zealand	van der Meer et al 2019
19.6	0.7	NA	NA	0.42	NA	NA	NA	0.1	2691	NA	30.4	0.03	80.6	NA	6.2	15.8	12.9	79.3	29.7	318.5	91.2	307.6	51.5	420	44.9	6060	8.2	786.7	869	NA	SHAG5-7	Zealandia	New Zealand	van der Meer et al 2019
19.7659876	2.466199739	NA	107.9878074	NA	NA	NA	NA	NA	293.4887499	NA	NA	NA	10.04051081	NA	NA	1.148196891	0.425576945	NA	NA	21.3584844	NA	NA	NA	NA	30.73834869	NA	NA	52.91444008	141.5679481	NA	callen\080416\negt-133	South America	South America	Zhu et al 2020
20.47665418	0.559658614	NA	251.7162699	NA	NA	NA	NA	NA	1886.330076	NA	NA	0.031673695	62.62708879	NA	NA	5.3148222	0.920087914	NA	NA	162.2336314	NA	NA	NA	NA	115.0138703	NA	NA	1445.391492	1704.764144	NA	callen\061107\riog-006	North America	Western US	Zhu et al 2020
21.27358041	0.546564989	NA	52.37171106	NA	NA	NA	NA	NA	NA	NA	NA	0.079635209	25.33444052	NA	0.774636554	0.767420391	24.41386554	NA	NA	41.35184234	NA	NA	NA	NA	24.5299323	NA	NA	474.8245898	988.7000614	NA	CALLEN\010827\IND-106	Asia	Southern Asia	Zhu et al 2020
21.2829577	3.712513798	NA	NA	NA	NA	NA	NA	NA	NA	NA	NA	NA	13.369976	NA	0.24	0.43992	0.2199855	4.847	2.982	28.999964	12.1199836	67.65	15.7999896	174.99926	39.334	NA	NA	76	15	NA	199453 48d	Australia	Southern Australia	Barham et al 2019
21.8	3	NA	NA	14.9	NA	NA	NA	0.02	78.9	NA	1.02	NA	0.99	NA	0.23	0.54	0.4	2.53	0.86	9.48	2.99	12.3	2.43	49.3	3.55	4920	0.66	4.79	14.8	NA	SHAG3-1	Zealandia	New Zealand	van der Meer et al 2019
21.83101273	5.450564748	NA	146.918806	16.22949839	NA	NA	NA	NA	1467.580784	NA	3.696189801	1.153931677	5.643088088	0.549629117	7.7627948	12.52704389	3.331778303	52.45174945	17.4747927	182.1519158	60.3159212	230.3853363	48.85118986	476.0740101	51.4603303	6732.679257	1.445877514	60.11484257	76.35416055	NA	13MFT-5 SPOT 685	North America	Western North America	Rivera et al 2016
22	3.5	NA	NA	2.18	NA	NA	NA	0.0727	51.2	NA	1.13	NA	0.35	0.003	0.05	0.13	0.13	0.98	0.38	5	1.67	7.4	1.6	13.7	2.12	6604	0.8	1.6	8.6	NA	MML1.2.1	Australia	Eastern Australia	Sutherland et al 2016
22.21338208	3.968198083	NA	181.0449778	17.50920777	NA	NA	NA	NA	2627.809162	NA	8.915391176	1.924308004	13.09615434	0.797164858	9.665879637	19.1682296	2.58208961	93.93760917	29.02331964	313.0561133	100.9065768	383.2009836	81.54127962	757.8625167	88.32656418	8153.456058	2.656633756	192.247456	158.3942927	NA	13MFT-1 SPOT 361	North America	Western North America	Rivera et al 2016
22.39928952	0.475928562	NA	1979.303348	NA	NA	NA	NA	NA	8907.85382	NA	NA	0.710447121	191.7741204	NA	NA	18.90353047	1.547833393	NA	NA	699.1579114	NA	NA	NA	NA	476.3395872	NA	NA	8716.509871	7521.446222	NA	callen\050707\npl-047	North America	Western US	Zhu et al 2020
22.5	0.8	NA	160.6	2.931	NA	NA	NA	NA	982.45	NA	8.822	0.157	24.999	0.16	1.234	2.2	0.858	11.732	5.02	61.288	25.747	130.688	31.656	262.486	75.096	10906.425	1.414	267.358	799.725	NA	Danube.Spot 51	Europe	Europe	Balica et al 2020
22.52835006	1.167895336	NA	268.7692854	NA	NA	NA	NA	NA	1659.120636	NA	NA	0.05970012	66.78820928	NA	NA	11.72925177	3.947967315	NA	NA	160.9928608	NA	NA	NA	NA	87.63448591	NA	NA	255.7894489	182.7015791	NA	callen\050707\npl-043	North America	Western US	Zhu et al 2020
24.1	1.8	NA	NA	4.41	NA	NA	NA	0.0787	119	NA	1.55	0.04	0.63	0.038	0.58	0.99	0.71	4.62	1.34	14.3	4.11	15.6	2.9	23.5	3.46	9073	1.06	6.2	14.1	NA	MML1.3.1	Australia	Eastern Australia	Sutherland et al 2016
24.33301468	0.605959063	NA	1240.910136	NA	NA	NA	NA	NA	7869.320246	NA	NA	0.042398582	85.21419991	NA	NA	21.3043758	9.432268185	NA	NA	718.6041242	NA	NA	NA	NA	377.3160675	NA	NA	791.8031291	900.4057965	NA	callen\061107\riog-057	North America	Western US	Zhu et al 2020
24.4	2.8	NA	NA	3.75	NA	NA	NA	0.103	183	NA	2.13	NA	0.49	0.008	0.16	0.5	0.43	3.55	1.33	17.7	6.14	27.3	5.9	51.6	8.18	6338	1.59	5.9	25.5	NA	MML1.4.1	Australia	Eastern Australia	Sutherland et al 2016
24.70483181	0.574683437	NA	108.0199106	NA	NA	NA	NA	NA	585.7814649	NA	NA	NA	0.822796365	NA	NA	0.480405346	NA	NA	NA	33.85564826	NA	NA	NA	NA	57.20924209	NA	NA	86.36418367	3404.747475	NA	lucy\050618\YNG-241	Asia	China	Zhu et al 2020
24.77385377	0.56376141	NA	65.49074281	NA	NA	NA	NA	NA	NA	NA	NA	0.063542279	62.79284726	NA	2.317882139	2.532508588	57.55156428	NA	NA	82.97638285	NA	NA	NA	NA	39.27923702	NA	NA	1922.045953	2327.306407	NA	CALLEN\010827\IND-094	Asia	Southern Asia	Zhu et al 2020
24.91159946	0.863522366	NA	52.95541998	NA	NA	NA	NA	NA	586.7636588	NA	NA	0.043727075	38.00580367	NA	NA	1.134306115	0.497146618	NA	NA	31.13980535	NA	NA	NA	NA	60.25462933	NA	NA	200.1065152	218.5858442	NA	callen\060609\e10-079	Europe	Europe	Zhu et al 2020
25.00893151	0.606096796	NA	207.9476055	NA	NA	NA	NA	NA	NA	NA	NA	0.039189257	183.4131272	NA	7.918019999	NA	5.001325362	NA	NA	151.6241428	NA	NA	NA	NA	53.12709655	NA	NA	1570.865534	734.0775413	NA	callen\010726\NEG-006	South America	South America	Zhu et al 2020
25.05073494	1.215065692	NA	337.1590833	NA	NA	NA	NA	NA	NA	NA	NA	NA	0.485170807	NA	1.015602078	0.5775537	44.52292838	NA	NA	68.13952255	NA	NA	NA	NA	30.54220651	NA	NA	7.367401506	1262.649809	NA	CALLEN\010827\IND-130	Asia	Southern Asia	Zhu et al 2020
25.75216402	0.820373874	NA	31.5429819	NA	NA	NA	NA	NA	NA	NA	NA	NA	0.273470471	NA	0.181478498	0.394816057	0.221139344	NA	NA	37.75396558	NA	NA	NA	NA	33.34232417	NA	NA	4.733339959	326.449113	NA	callen\030303\gan05-i5	Asia	Southern Asia	Zhu et al 2020
25.85592779	1.05995551	NA	73.3911374	NA	NA	NA	NA	NA	949.7365915	NA	NA	0.071973489	28.91650883	NA	NA	4.199540843	2.641413092	NA	NA	68.10992237	NA	NA	NA	NA	70.790456	NA	NA	150.1739164	134.1791684	NA	callen\060609\e10-005	Europe	Europe	Zhu et al 2020
27.63551529	1.747963216	NA	136.505442	NA	NA	NA	NA	NA	NA	NA	NA	NA	0.46191064	NA	NA	NA	NA	NA	NA	26.4525772	NA	NA	NA	NA	11.53281032	NA	NA	1.925749659	445.4908343	NA	callen\030820\gr8-41	Asia	Southern Asia	Zhu et al 2020
27.8	0.6	NA	NA	8.9	NA	NA	NA	NA	275.8	NA	NA	0.071	8.9	0.108	1.2	1.89	0.27	11.7	4	52.7	22.5	104	26	207.3	48.7	2775.5	NA	235	511	Northern Diorite	TT102_8.2	South America	South America	Munoz et al 2012
28.23239554	1.090897306	NA	163.9913231	NA	NA	NA	NA	NA	601.4485387	NA	NA	NA	12.33880571	NA	0.965412701	2.185357003	0.515456305	NA	NA	42.1649442	NA	NA	NA	NA	61.51218862	NA	NA	221.5978194	561.7855724	NA	callen\050127\m0-082	North America	Eastern US	Zhu et al 2020
30.14464519	0.725503822	NA	141.0081923	NA	NA	NA	NA	NA	NA	NA	NA	NA	10.26533537	NA	NA	3.379698519	0.760233862	NA	NA	47.34189155	NA	NA	NA	NA	31.4407226	NA	NA	607.0048854	1197.511578	NA	wang yan\070105\po-159	Europe	Europe	Zhu et al 2020
30.35515509	0.876672633	NA	178.4502353	NA	NA	NA	NA	NA	3691.528303	NA	NA	0.039144842	26.8891371	NA	NA	17.98291426	0.108057832	NA	NA	408.4094933	NA	NA	NA	NA	127.5928944	NA	NA	185.4717915	353.8590051	NA	callen\061107\riog-145	North America	Western US	Zhu et al 2020
30.53561534	15.68763031	NA	206.2653433	11.78303585	NA	NA	NA	NA	845.1130861	NA	9.062489908	2.746795913	13.92283103	0.697353274	6.273450375	4.988302635	0.681532241	24.49278564	8.258047536	96.1517529	32.71875595	131.2597134	30.52866837	324.0252946	33.28888957	7752.574585	2.922897749	90.10077184	132.2103781	NA	13MFT-7 SPOT 589	North America	Western North America	Rivera et al 2016
31.33300288	0.804013311	NA	207.5037651	NA	NA	NA	NA	NA	1700.660559	NA	NA	NA	32.09613692	NA	0.783800742	2.830196148	0.710889539	NA	NA	126.9485408	NA	NA	NA	NA	124.2525512	NA	NA	566.8882877	3080.325375	NA	callen\041216\po-133	Europe	Europe	Zhu et al 2020
31.67337042	0.863841604	NA	656.0522638	NA	NA	NA	NA	NA	3291.425318	NA	NA	NA	77.64073077	NA	NA	13.89988535	1.394215147	NA	NA	319.8407151	NA	NA	NA	NA	140.9587231	NA	NA	341.87818	395.0920208	NA	callen\061107\riog-139	North America	Western US	Zhu et al 2020
31.73958554	0.989493107	NA	289.774122	NA	NA	NA	NA	NA	NA	NA	NA	0.043331298	9.307603498	NA	NA	1.679196931	0.76731104	NA	NA	62.34467408	NA	NA	NA	NA	74.92890102	NA	NA	123.7847493	251.4970679	NA	wang yan\070105\po-156	Europe	Europe	Zhu et al 2020
31.78298227	47.55403694	NA	234.507628	29.79630538	NA	NA	NA	NA	1811.955212	NA	4.124919511	10.44679281	44.24896054	3.477443914	24.19828557	19.02277013	3.129799815	71.44928866	20.63970094	217.8346354	68.45765107	255.1865493	57.20977253	600.4606298	59.28543386	7209.203653	2.196566228	85.29991799	102.6259549	NA	13MFT-6 SPOT 321	North America	Western North America	Rivera et al 2016
31.99580979	0.936288853	NA	166.8920894	NA	NA	NA	NA	NA	NA	NA	NA	NA	10.84106577	NA	NA	1.144677643	0.313313051	NA	NA	30.98122045	NA	NA	NA	NA	38.32294435	NA	NA	117.3992289	270.4958398	NA	wang yan\070105\po-163	Europe	Europe	Zhu et al 2020
32.35879092	0.846744521	NA	313.3083214	NA	NA	NA	NA	NA	2100.064892	NA	NA	0.073618282	9.739796748	NA	NA	2.536845282	1.89815101	NA	NA	161.7941503	NA	NA	NA	NA	146.5998706	NA	NA	183.3398905	1428.382484	NA	callen\060619\red-153	North America	Eastern US	Zhu et al 2020
32.49926416	1.13364504	NA	550.0613089	NA	NA	NA	NA	NA	1667.145613	NA	NA	NA	27.90888451	NA	NA	9.139848752	2.778428576	NA	NA	164.5694513	NA	NA	NA	NA	79.30918162	NA	NA	118.4726765	132.8288439	NA	callen\061107\riog-174	North America	Western US	Zhu et al 2020
32.62097495	2.278958413	NA	203.756437	NA	NA	NA	NA	NA	NA	NA	NA	0.073002339	27.24789179	NA	1.326005015	2.984242528	1.04465055	NA	NA	65.6496934	NA	NA	NA	NA	59.7622981	NA	NA	121.3918768	171.0281938	NA	callen\030114\jo4-054	South America	South America	Zhu et al 2020
32.7203622	1.386786117	NA	68.86576318	NA	NA	NA	NA	NA	1339.807154	NA	NA	NA	3.708937107	NA	NA	1.495679056	1.38071383	NA	NA	105.2645326	NA	NA	NA	NA	71.97203235	NA	NA	26.71004425	635.8916818	NA	callen\060920\cdn-089	North America	Western US	Zhu et al 2020
32.78771039	2.065007577	NA	213.4023474	NA	NA	NA	NA	NA	1380.366269	NA	NA	NA	8.055479661	NA	NA	10.388381	0.814507921	NA	NA	150.4253415	NA	NA	NA	NA	56.67909665	NA	NA	45.01926062	66.17752235	NA	callen\061107\riog-196	North America	Western US	Zhu et al 2020
32.87287757	1.549606747	NA	251.9150315	NA	NA	NA	NA	NA	NA	NA	NA	0.047955828	11.84958777	NA	NA	1.903589044	0.576864044	NA	NA	63.49716442	NA	NA	NA	NA	71.79796993	NA	NA	123.1070642	169.9613428	NA	wang yan\070105\po-173	Europe	Europe	Zhu et al 2020
33.02251975	1.004639593	NA	250.4114361	NA	NA	NA	NA	NA	NA	NA	NA	0.056903126	9.999680466	NA	NA	2.272709612	0.464232324	NA	NA	62.99954896	NA	NA	NA	NA	73.76590053	NA	NA	130.2255071	273.4621209	NA	wang yan\070105\po-197	Europe	Europe	Zhu et al 2020
33.3	0.6	NA	55	NA	NA	NA	NA	0.23	427	NA	NA	0.073	25	0.038	0.44	0.9	0.39	5.7	2.11	26.3	11.2	61.2	16	185	43.5	10505	NA	154	354	NA	603-05	South America	South America	Ballard et al 2002
33.3	0.6	NA	79	NA	NA	NA	NA	0.3	539	NA	NA	0.094	22	0.052	0.74	1.2	0.41	6.9	2.54	33	14.1	78	20.7	252	62.7	10951	NA	164	399	NA	603-03	South America	South America	Ballard et al 2002
33.3	0.6	NA	61	NA	NA	NA	NA	0.24	454	NA	NA	0.012	24	0.019	0.43	0.79	0.37	5.6	2.09	26.9	11.7	67.2	17.6	210	53.4	9643	NA	184	405	NA	603-09	South America	South America	Ballard et al 2002
33.3	0.6	NA	83	NA	NA	NA	NA	0.3	751	NA	NA	0.103	30	0.074	0.97	1.9	0.7	12.6	4.95	58.3	22.6	111.9	26.3	267	56.5	10851	NA	278	378	NA	603-02	South America	South America	Ballard et al 2002
33.3	0.6	NA	69	NA	NA	NA	NA	0.22	671	NA	NA	0.026	44	0.037	0.92	1.8	0.63	11.2	3.89	46	18.3	94.9	23	256	56.3	10752	NA	300	453	NA	603-10	South America	South America	Ballard et al 2002
33.3	0.6	NA	93	NA	NA	NA	NA	0.44	1041	NA	NA	0.077	40	0.239	3.04	4.76	1.3	24.5	7.53	79.4	28.6	136.6	31.8	350	77.5	10772	NA	340	482	NA	603-04	South America	South America	Ballard et al 2002
33.3	0.6	NA	94	NA	NA	NA	NA	1.25	1213	NA	NA	0.039	57	0.055	0.97	2.54	1.02	19.1	7.36	87.5	35.1	172.3	41.1	428	92.1	11062	NA	350	609	NA	603-01	South America	South America	Ballard et al 2002
33.3	0.6	NA	62	NA	NA	NA	NA	0.26	705	NA	NA	0.013	38	0.038	0.68	1.94	0.8	11.9	4.2	48.6	19.4	99.7	24.7	277	65.1	10704	NA	373	534	NA	603-06	South America	South America	Ballard et al 2002
33.3	0.6	NA	77	NA	NA	NA	NA	0.31	853	NA	NA	0.038	47	0.045	0.87	2.13	0.81	12.8	4.58	55.7	22.8	120.1	30.4	345	81	10529	NA	512	764	NA	603-07	South America	South America	Ballard et al 2002
33.3	0.6	NA	65	NA	NA	NA	NA	0.52	1164	NA	NA	0.224	53	0.152	1.85	3.55	1.16	20.6	7.26	84.4	33.7	169.7	41.9	463	104.9	12286	NA	648	755	NA	603-08	South America	South America	Ballard et al 2002
33.36598715	0.813920604	NA	189.0261498	NA	NA	NA	NA	NA	3253.6159	NA	NA	NA	75.09501434	NA	NA	27.8661171	15.91295581	NA	NA	346.9739144	NA	NA	NA	NA	102.2492063	NA	NA	1210.045082	2770.681592	NA	callen\050720\shr-168	Asia	Southern Asia	Zhu et al 2020
33.47156193	27.78243108	NA	135.2598127	6.394006603	NA	NA	NA	NA	516.3709835	NA	5.950292139	4.787041454	9.43758835	1.245362632	5.992805695	4.35352808	0.083434072	13.44608013	4.174482941	51.83136759	19.40952134	80.50648546	20.058428	191.0239392	25.939443	10788.09965	3.11787975	41.5276616	68.63802879	NA	13MFT-5 SPOT 635	North America	Western North America	Rivera et al 2016
33.5	0.4	NA	75	NA	NA	NA	NA	0.72	208	NA	NA	0.156	13	0.115	0.17	0.68	0.2	3.2	1.15	13.9	5.9	32.2	8.4	93	23.2	9640	NA	89	177	NA	609-10	South America	South America	Ballard et al 2002
33.5	0.4	NA	190	NA	NA	NA	NA	0.34	827	NA	NA	0.027	18	0.041	0.78	2.39	0.54	13.7	5.07	62.2	25.5	124.1	29.6	293	65.3	7750	NA	105	155	NA	609-09	South America	South America	Ballard et al 2002
33.5	0.4	NA	74	NA	NA	NA	NA	0.23	823	NA	NA	0.021	37	0.048	0.72	1.67	0.63	11.6	4.21	52.5	21.7	117.3	28.3	311	70.8	9816	NA	144	332	NA	609-06	South America	South America	Ballard et al 2002
33.5	0.4	NA	55	NA	NA	NA	NA	0.23	515	NA	NA	0.162	25	0.073	0.55	1.04	0.4	5.6	2.21	29.2	12.8	74.3	20.3	248	62.1	11684	NA	189	410	NA	609-02	South America	South America	Ballard et al 2002
33.5	0.4	NA	103	NA	NA	NA	NA	0.27	747	NA	NA	0.03	27	0.065	0.98	2.11	0.84	11.5	4.23	49.5	19.7	103.4	26.4	296	69.4	9974	NA	217	399	NA	609-01	South America	South America	Ballard et al 2002
33.5	0.4	NA	62	NA	NA	NA	NA	0.32	607	NA	NA	0.076	33	0.063	0.53	1.49	0.57	9.6	3.48	41.2	16.7	87	21.6	233	54.3	10690	NA	242	426	NA	609-08	South America	South America	Ballard et al 2002
33.5	0.4	NA	113	NA	NA	NA	NA	0.39	1441	NA	NA	0.044	63	0.052	1.03	3.28	1.27	23.9	9.08	107.7	42.2	208.2	48.2	492	104.7	10161	NA	333	567	NA	609-05	South America	South America	Ballard et al 2002
33.5	0.4	NA	88	NA	NA	NA	NA	0.35	1217	NA	NA	NA	60	0.101	1.32	3.61	1.57	21.6	7.89	93.1	35	174.3	39.8	409	90.7	9561	NA	507	642	NA	609-04	South America	South America	Ballard et al 2002
33.5	0.4	NA	105	NA	NA	NA	NA	0.39	1635	NA	NA	0.017	73	0.085	1.96	5.03	1.88	32.9	11.33	127	47.2	229.4	51.9	530	112	10260	NA	524	614	NA	609-03	South America	South America	Ballard et al 2002
33.5	0.4	NA	97	NA	NA	NA	NA	0.4	1522	NA	NA	0.019	85	0.08	1.61	3.29	0.86	22.2	8.39	99.8	40.5	211.1	52.2	550	127	9324	NA	789	838	NA	609-07	South America	South America	Ballard et al 2002
33.61852898	0.790352304	NA	79.1954992	NA	NA	NA	NA	NA	910.608576	NA	NA	0.202007113	192.0655506	NA	NA	10.134962	3.472621888	NA	NA	78.7009407	NA	NA	NA	NA	61.61306365	NA	NA	4175.747275	2721.59014	NA	callen\050907\clo-098	North America	Western US	Zhu et al 2020
33.75999169	0.903142783	NA	664.4696668	NA	NA	NA	NA	NA	2636.287035	NA	NA	0.036959873	40.08583859	NA	NA	7.014659921	1.447087533	NA	NA	223.9667384	NA	NA	NA	NA	157.0446248	NA	NA	356.7136612	458.337748	NA	callen\061107\riog-188	North America	Western US	Zhu et al 2020
34	0.8	NA	50	NA	NA	NA	NA	0.26	580	NA	NA	0.011	21	0.09	1.06	2.31	0.83	10.6	3.56	41.8	16.6	84.3	22	251	54.9	10811	NA	165	305	NA	081-2	South America	South America	Ballard et al 2002
34	0.8	NA	50	NA	NA	NA	NA	0.27	636	NA	NA	0.062	30	0.057	0.58	1.2	0.41	8.2	3.09	41.1	17.8	95.6	26.4	301	70.1	10268	NA	196	385	NA	081-8	South America	South America	Ballard et al 2002
34	0.8	NA	56	NA	NA	NA	NA	0.29	806	NA	NA	0.007	36	0.003	0.62	1.47	0.63	10.3	4	52.5	22.2	121	32.3	371	84.3	10511	NA	218	456	NA	081-7	South America	South America	Ballard et al 2002
34	0.8	NA	87	NA	NA	NA	NA	0.36	1236	NA	NA	0.004	48	0.049	1.15	2.56	1.24	19.5	7.61	93.7	37.2	179.6	46.6	480	96.8	11202	NA	234	454	NA	081-4	South America	South America	Ballard et al 2002
34	0.8	NA	65	NA	NA	NA	NA	0.32	898	NA	NA	0.005	37	0.038	0.65	1.69	0.66	11	4.4	58.2	24.1	132.7	35.5	412	91.7	10786	NA	246	518	NA	081-10	South America	South America	Ballard et al 2002
34	0.8	NA	75	NA	NA	NA	NA	0.32	724	NA	NA	0.14	34	0.069	0.71	1.52	0.63	9.9	3.81	47.2	20.2	109.6	29.4	338	77.5	11021	NA	258	494	NA	081-3	South America	South America	Ballard et al 2002
34	0.8	NA	54	NA	NA	NA	NA	0.22	615	NA	NA	0.002	38	0.027	0.71	1.6	0.69	9.4	3.58	42	17.2	86.4	22.4	254	52.2	12461	NA	334	525	NA	081-6	South America	South America	Ballard et al 2002
34	0.8	NA	91	NA	NA	NA	NA	0.34	920	NA	NA	0.02	43	0.043	1.01	1.96	0.79	13.7	5.36	66.2	26.6	136	34.9	385	83.3	10192	NA	343	566	NA	081-5	South America	South America	Ballard et al 2002
34	0.8	NA	60	NA	NA	NA	NA	0.55	927	NA	NA	0.105	44	0.085	0.88	1.87	0.71	12.4	4.83	61.3	26.4	137.2	35.5	405	89.3	10055	NA	347	585	NA	081-1	South America	South America	Ballard et al 2002
34	0.8	NA	93	NA	NA	NA	NA	0.36	1090	NA	NA	0.054	51	0.065	1.23	3.2	1.12	19	6.77	81	31.1	154.7	39.1	421	86.5	10338	NA	421	575	NA	081-9	South America	South America	Ballard et al 2002
34.54426499	0.939196944	NA	134.0047599	NA	NA	NA	NA	NA	1297.906252	NA	NA	NA	49.34551746	NA	NA	10.58617021	2.217424954	NA	NA	126.0733127	NA	NA	NA	NA	63.42065862	NA	NA	758.2329047	722.9135666	NA	callen\050720\shr-170	Asia	Southern Asia	Zhu et al 2020
34.6	0.4	NA	178	NA	NA	NA	NA	0.3	1436	NA	NA	0.044	19	0.104	1.59	3.29	2.01	23.4	9.21	112.4	43.9	210.8	45.4	449	92.7	6674	NA	35	80	NA	610-01	South America	South America	Ballard et al 2002
34.6	0.4	NA	48	NA	NA	NA	NA	0.12	216	NA	NA	NA	14	0.015	0.21	0.4	0.24	3.1	1.16	14.6	6	32.8	8.5	99	24.3	11411	NA	84	202	NA	610-03	South America	South America	Ballard et al 2002
34.6	0.8	NA	86	NA	NA	NA	NA	0.27	447	NA	NA	0.009	17	0.013	0.26	0.81	0.31	5.1	2.05	27.3	12.3	65.2	17.9	216	49	9998	NA	90	228	NA	695-5	South America	South America	Ballard et al 2002
34.6	0.8	NA	54	NA	NA	NA	NA	0.29	566	NA	NA	0.001	24	0.031	0.42	1	0.42	7.1	2.69	34.7	15.3	83.6	23.4	282	65.4	11693	NA	119	268	NA	695-10	South America	South America	Ballard et al 2002
34.6	0.4	NA	99	NA	NA	NA	NA	0.3	735	NA	NA	0.06	21	0.024	0.55	1.41	0.72	9.2	3.7	46.9	19.9	106	26.9	307	72.5	10160	NA	122	308	NA	610-09	South America	South America	Ballard et al 2002
34.6	0.8	NA	75	NA	NA	NA	NA	0.3	668	NA	NA	0.004	21	0.044	0.91	1.98	0.72	10.9	4.11	48.4	18.7	95.8	25.3	285	59.2	12587	NA	130	268	NA	695-1	South America	South America	Ballard et al 2002
34.6	0.8	NA	67	NA	NA	NA	NA	0.32	732	NA	NA	0	32	0.032	0.46	1.69	0.57	10.3	4.01	50.3	21.1	107.9	28.8	334	70.6	11680	NA	158	298	NA	695-8	South America	South America	Ballard et al 2002
34.6	0.8	NA	50	NA	NA	NA	NA	0.25	430	NA	NA	0.006	24	0.023	0.48	0.88	0.43	6	2.38	28.9	12.1	64.5	17.2	210	47.5	12525	NA	171	338	NA	695-7	South America	South America	Ballard et al 2002
34.6	0.8	NA	55	NA	NA	NA	NA	0.33	744	NA	NA	0.005	33	0.009	0.58	1.24	0.6	8.4	3.44	43.7	19.7	110.6	30.9	387	85.7	12702	NA	213	452	NA	695-6	South America	South America	Ballard et al 2002
34.6	0.4	NA	101	NA	NA	NA	NA	0.31	1595	NA	NA	0.016	53	0.139	2.36	5.81	3.29	38.3	12.88	139.7	50.2	222.5	48.4	467	93.7	8390	NA	233	303	NA	610-10	South America	South America	Ballard et al 2002
34.6	0.4	NA	46	NA	NA	NA	NA	0.3	859	NA	NA	0.018	40	0.017	0.61	1.7	0.69	11.2	4.45	56.8	23.6	123.6	31.4	353	83.7	10640	NA	247	412	NA	610-08	South America	South America	Ballard et al 2002
34.6	0.4	NA	64	NA	NA	NA	NA	0.39	676	NA	NA	0.496	35	0.098	0.94	1.62	0.68	10	3.66	44.6	18.3	97.7	24.6	278	66.3	9730	NA	274	417	NA	610-05	South America	South America	Ballard et al 2002
34.6	0.4	NA	69	NA	NA	NA	NA	0.38	968	NA	NA	0.029	42	0.06	1.06	2.53	0.98	14.7	5.42	64.9	26.7	137	33.8	371	86.4	10360	NA	276	418	NA	610-07	South America	South America	Ballard et al 2002
34.6	0.8	NA	56	NA	NA	NA	NA	0.35	841	NA	NA	0.002	34	0.015	0.56	1.44	0.82	10.9	4.54	55.5	24.1	131.5	36.3	445	103.8	12857	NA	276	595	NA	695-2	South America	South America	Ballard et al 2002
34.6	0.4	NA	63	NA	NA	NA	NA	0.29	611	NA	NA	0.014	33	0.046	0.52	1.23	0.54	8.1	3.12	39	16.3	88.4	22.5	258	62.5	10060	NA	294	509	NA	610-04	South America	South America	Ballard et al 2002
34.6	0.8	NA	62	NA	NA	NA	NA	0.31	790	NA	NA	0.003	39	0.07	1.04	3.15	1.24	16.4	5.33	64.1	23.8	119.1	29.4	325	66.5	11790	NA	342	392	NA	695-4	South America	South America	Ballard et al 2002
34.6	0.8	NA	81	NA	NA	NA	NA	0.37	619	NA	NA	0.019	40	0.059	0.82	2.11	0.78	11.4	4	47	18.2	90	22.7	248	53	10365	NA	438	487	NA	695-3	South America	South America	Ballard et al 2002
34.6	0.4	NA	89	NA	NA	NA	NA	0.29	557	NA	NA	0.062	36	0.05	0.76	1.54	0.75	9.8	3.44	39.9	15.2	78.6	19	212	49.2	10153	NA	513	663	NA	610-02	South America	South America	Ballard et al 2002
34.6	0.4	NA	106	NA	NA	NA	NA	0.36	813	NA	NA	0.135	50	0.101	1.22	2.67	0.99	15.8	5.55	64.8	23.9	114.8	26.9	279	59	9729	NA	607	580	NA	610-06	South America	South America	Ballard et al 2002
34.6	0.8	NA	105	NA	NA	NA	NA	0.55	1797	NA	NA	0.019	68	0.087	1.77	4.42	1.52	27.5	10.52	126.2	51	259.8	67.8	772	162.7	12072	NA	2628	2194	NA	695-9	South America	South America	Ballard et al 2002
36.8310196	0.943339139	NA	88.5983334	NA	NA	NA	NA	NA	NA	NA	NA	0.034741187	32.3219734	NA	0.73187192	1.654659081	0.838206126	NA	NA	47.99868401	NA	NA	NA	NA	51.28930121	NA	NA	269.4736146	514.7504626	NA	callen\020917\CR-052	North America	Western US	Zhu et al 2020
37.4	0.6	NA	56	NA	NA	NA	NA	0.19	230	NA	NA	0.001	11	0.023	0.19	0.78	0.24	3.9	1.49	18	6.9	35.6	9.4	107	22	8989	NA	55	106	NA	176-3	South America	South America	Ballard et al 2002
37.4	0.6	NA	60	NA	NA	NA	NA	0.13	186	NA	NA	NA	10	NA	0.16	0.52	0.17	2.7	1.16	13.9	5.5	29.2	8	87	19.1	9254	NA	57	121	NA	176-10	South America	South America	Ballard et al 2002
37.4	0.6	NA	149	NA	NA	NA	NA	0.17	290	NA	NA	0.142	12	0.031	0.62	0.67	0.19	5.4	2.03	25.2	9.3	44.7	10.1	107	21	8169	NA	60	105	NA	176-7	South America	South America	Ballard et al 2002
37.4	0.6	NA	51	NA	NA	NA	NA	0.3	365	NA	NA	0.056	11	0.081	0.63	1.65	0.54	7.1	2.23	29.6	10.8	54.3	13.9	155	30.7	10425	NA	78	120	NA	176-9	South America	South America	Ballard et al 2002
37.4	0.6	NA	124	NA	NA	NA	NA	1.88	749	NA	NA	0.021	16	0.039	0.74	1.67	0.49	10.4	4.28	54	22.9	121.2	30.6	338	69	8478	NA	99	146	NA	176-4	South America	South America	Ballard et al 2002
37.4	0.6	NA	61	NA	NA	NA	NA	0.14	287	NA	NA	0.008	10	0.021	0.52	0.89	0.29	4.5	1.8	21.3	8.5	44.4	11.3	126	26.6	7912	NA	101	137	NA	176-2	South America	South America	Ballard et al 2002
37.4	0.6	NA	65	NA	NA	NA	NA	0.19	319	NA	NA	0.004	13	0.003	0.17	0.96	0.25	4.9	1.9	23.9	9.5	50.4	13.2	157	34.3	9674	NA	144	248	NA	176-5	South America	South America	Ballard et al 2002
37.4	0.6	NA	124	NA	NA	NA	NA	0.34	791	NA	NA	0.018	28	0.068	1.18	1.68	0.66	11.5	4.97	59.4	24	122.2	30.5	319	64.2	7649	NA	268	333	NA	176-6	South America	South America	Ballard et al 2002
37.4	0.6	NA	247	NA	NA	NA	NA	1.11	1956	NA	NA	1.746	54	0.336	1.74	3.21	0.69	26.1	11.05	148.7	61.2	311.7	78	821	160	12826	NA	445	1075	NA	176-8	South America	South America	Ballard et al 2002
37.7	2	NA	52	NA	NA	NA	NA	0.14	172	NA	NA	0.007	9	0.013	0.12	0.5	0.14	2.9	1.07	13.4	5.2	28.7	7.4	87	18.2	11791	NA	51	111	NA	679-6	South America	South America	Ballard et al 2002
37.7	2	NA	49	NA	NA	NA	NA	0.41	233	NA	NA	0.137	11	0.054	0.43	0.39	0.21	2.9	1.12	12.9	5.6	31.6	9.2	118	31.3	9777	NA	72	183	NA	679-4	South America	South America	Ballard et al 2002
37.7	2	NA	80	NA	NA	NA	NA	0.21	328	NA	NA	0.029	13	0.022	0.44	0.88	0.34	5.3	2.13	25.1	10	51.8	13.1	147	29.7	10713	NA	73	131	NA	679-9	South America	South America	Ballard et al 2002
37.7	2	NA	81	NA	NA	NA	NA	0.22	461	NA	NA	0.098	12	0.097	1.15	2.23	0.64	9.9	3.37	38.8	14.1	70.8	17.7	194	38.6	10116	NA	96	129	NA	679-7	South America	South America	Ballard et al 2002
37.7	2	NA	77	NA	NA	NA	NA	0.27	487	NA	NA	0.029	18	0.037	0.64	1.21	0.66	8.5	3.07	37.2	15	79.4	20.1	224	48.4	11835	NA	101	195	NA	679-1	South America	South America	Ballard et al 2002
37.7	2	NA	58	NA	NA	NA	NA	0.28	513	NA	NA	NA	25	0.027	0.42	1.23	0.46	7.1	2.88	36.9	15.1	81.5	21.1	247	56.4	11663	NA	122	229	NA	679-8	South America	South America	Ballard et al 2002
37.7	2	NA	81	NA	NA	NA	NA	0.33	746	NA	NA	0.006	33	0.041	1.05	2.33	0.81	13.3	5.09	61.1	23.4	118.4	29.5	310	61.7	11433	NA	165	241	NA	679-5	South America	South America	Ballard et al 2002
37.9	0.4	NA	100	NA	NA	NA	NA	0.19	333	NA	NA	0.005	13	0.025	0.67	1.45	0.39	7.2	2.73	30	10.7	51.3	12.2	120	23.6	8236	NA	44	61	NA	067-6	South America	South America	Ballard et al 2002
37.9	0.4	NA	54	NA	NA	NA	NA	0.16	259	NA	NA	0.005	9	0.041	0.51	0.66	0.3	4.6	1.61	20.7	8	40.5	11.2	121	24.9	11295	NA	50	95	NA	698-7	South America	South America	Ballard et al 2002
37.9	0.4	NA	61	NA	NA	NA	NA	0.13	275	NA	NA	0.004	15	NA	0.23	0.85	0.19	4.3	1.83	20.4	7.9	42	11.6	126	25.1	12763	NA	67	134	NA	067-2	South America	South America	Ballard et al 2002
37.9	0.4	NA	79	NA	NA	NA	NA	0.17	274	NA	NA	NA	11	0.027	0.38	0.87	0.32	5	1.82	21.2	8.4	42	11.2	125	26.2	10077	NA	68	116	NA	698-4	South America	South America	Ballard et al 2002
37.9	0.4	NA	99	NA	NA	NA	NA	0.19	407	NA	NA	0.009	12	0.039	0.5	1.49	0.33	7.8	2.91	33.3	12.5	59.9	14.8	151	29.8	9544	NA	69	111	NA	698-3	South America	South America	Ballard et al 2002
37.9	0.4	NA	67	NA	NA	NA	NA	0.17	290	NA	NA	NA	12	0.017	0.2	0.75	0.32	4.5	1.85	21.6	8.5	45.1	11.8	132	27.5	10251	NA	72	131	NA	067-7	South America	South America	Ballard et al 2002
37.9	0.4	NA	84	NA	NA	NA	NA	0.15	252	NA	NA	0.005	11	0.014	0.43	0.97	0.3	4.6	1.69	19.5	7.6	38.1	10	114	24	9591	NA	73	112	NA	698-1	South America	South America	Ballard et al 2002
37.9	0.4	NA	82	NA	NA	NA	NA	0.18	374	NA	NA	0.002	10	0.068	1.33	2.06	0.68	9	2.81	32	11.7	56.9	14.2	149	31.5	9115	NA	75	104	NA	698-6	South America	South America	Ballard et al 2002
37.9	0.4	NA	91	NA	NA	NA	NA	0.17	296	NA	NA	0.024	7	0.053	0.63	1.16	0.14	5.6	2.06	24.2	9.1	43.5	10.4	107	21.9	11317	NA	84	436	NA	067-4	South America	South America	Ballard et al 2002
37.9	0.4	NA	123	NA	NA	NA	NA	0.27	745	NA	NA	0.005	13	0.114	1.87	3.66	0.93	16.8	6.21	67.5	24.5	113.9	26.5	264	48.6	9966	NA	93	112	NA	067-8	South America	South America	Ballard et al 2002
37.9	0.4	NA	93	NA	NA	NA	NA	0.18	446	NA	NA	0.007	12	0.014	0.6	1.35	0.46	8.4	3.1	36.9	13.9	67.7	17	179	35.9	10206	NA	105	150	NA	698-2	South America	South America	Ballard et al 2002
37.9	0.4	NA	75	NA	NA	NA	NA	0.16	252	NA	NA	0.004	12	0.023	0.34	0.96	0.37	4.6	1.69	20.7	7.9	38.8	9.9	109	22.8	9539	NA	106	132	NA	698-9	South America	South America	Ballard et al 2002
37.9	0.4	NA	64	NA	NA	NA	NA	0.25	558	NA	NA	0.004	12	0.104	1.92	3.5	1.16	14.1	4.24	48.2	16.5	78	19.5	200	39.7	10626	NA	106	135	NA	698-8	South America	South America	Ballard et al 2002
37.9	0.4	NA	116	NA	NA	NA	NA	0.26	995	NA	NA	0.001	15	0.093	2.27	5.17	1.15	26	9.11	95.6	33.2	143.2	31.6	292	51.2	9687	NA	108	119	NA	067-10	South America	South America	Ballard et al 2002
37.9	0.4	NA	84	NA	NA	NA	NA	0.17	312	NA	NA	0.009	14	0.008	0.47	1	0.32	5.3	1.99	23.9	9.4	48.8	12.5	140	29.7	10673	NA	128	207	NA	067-5	South America	South America	Ballard et al 2002
37.9	0.4	NA	114	NA	NA	NA	NA	0.22	609	NA	NA	0.006	22	0.073	1.33	2.58	0.66	12.4	4.37	50.1	18.9	90	21.9	219	42	9943	NA	159	184	NA	698-10	South America	South America	Ballard et al 2002
37.9	0.4	NA	70	NA	NA	NA	NA	0.22	326	NA	NA	0.006	13	0.028	0.48	0.99	0.39	5.7	2.07	23.8	9.7	50.9	13.8	162	35.3	10454	NA	169	406	NA	067-9	South America	South America	Ballard et al 2002
37.9	0.4	NA	99	NA	NA	NA	NA	0.32	757	NA	NA	0.014	29	0.054	1.33	2.29	0.97	13.3	5.1	64.2	25.4	133.7	33.2	386	75.4	12647	NA	222	321	NA	067-3	South America	South America	Ballard et al 2002
37.9	0.4	NA	58	NA	NA	NA	NA	0.28	483	NA	NA	0.001	18	0.015	0.38	0.96	0.31	5.8	2.41	31.2	13	76.2	22.1	266	60.9	11562	NA	315	677	NA	067-1	South America	South America	Ballard et al 2002
37.9	0.4	NA	81	NA	NA	NA	NA	0.23	562	NA	NA	0.009	28	0.05	0.95	1.73	0.49	8.9	3.47	42.2	16.9	85.2	23.7	261	55	10480	NA	469	501	NA	698-5	South America	South America	Ballard et al 2002
38	0.8	NA	NA	NA	NA	NA	NA	1.21	NA	NA	NA	0.143	8	0.153	1.45	0.89	0.54	5.9	1.79	21.7	8	37.4	9.1	129	17.7	2147	NA	32	56	NA	98-530.8	South America	South America	Ballard et al 2002
38	0.6	NA	89	NA	NA	NA	NA	0.14	310	NA	NA	0	9	0.022	0.43	1.21	0.23	5.8	2.23	25.8	9.6	46.3	11.2	114	21.6	8562	NA	39	65	NA	165-5	South America	South America	Ballard et al 2002
38	0.6	NA	113	NA	NA	NA	NA	0.22	507	NA	NA	0.004	16	0.037	1.04	2.49	0.71	11.8	4.06	43.6	16.4	77.2	18.4	182	34.9	8310	NA	57	84	NA	165-9	South America	South America	Ballard et al 2002
38	0.6	NA	102	NA	NA	NA	NA	0.13	296	NA	NA	0.007	11	0.013	0.42	1.51	0.41	5.1	2.07	25.1	9.2	43	10.7	111	22.5	7573	NA	65	91	NA	165-7	South America	South America	Ballard et al 2002
38	0.8	NA	NA	NA	NA	NA	NA	0.87	NA	NA	NA	0.077	9	0.022	2.32	1.37	0.26	4.9	1.46	24.5	9.1	43.1	10.8	153	22.9	2271	NA	66	165	NA	98-530.7	South America	South America	Ballard et al 2002
38	0.6	NA	111	NA	NA	NA	NA	0.25	396	NA	NA	0.009	12	0.034	0.74	1.4	0.28	8.4	3.03	34.6	12.8	58.5	13.9	133	24.7	8256	NA	71	96	NA	165-2	South America	South America	Ballard et al 2002
38	0.6	NA	64	NA	NA	NA	NA	0.21	267	NA	NA	NA	11	0.03	0.51	0.76	0.41	4.3	1.78	21.2	7.7	41.8	11	122	25.2	9820	NA	84	147	NA	165-8	South America	South America	Ballard et al 2002
38	0.6	NA	153	NA	NA	NA	NA	0.13	252	NA	NA	0.246	11	0.022	0.46	0.77	0.3	4.4	1.61	20.4	7.4	38.7	10.1	108	23.9	8009	NA	92	131	NA	165-1	South America	South America	Ballard et al 2002
38	0.6	NA	92	NA	NA	NA	NA	0.18	541	NA	NA	0.002	10	0.078	1	1.79	0.48	10.9	3.86	47.7	17.6	84.3	19.6	185	36.5	8471	NA	96	106	NA	165-4	South America	South America	Ballard et al 2002
38	0.8	NA	NA	NA	NA	NA	NA	0.61	NA	NA	NA	0.005	13	0.275	2.61	1.49	0.27	7.4	3.19	41.2	16.5	81.4	20.8	264	43	2323	NA	99	138	NA	98-530.4	South America	South America	Ballard et al 2002
38	0.8	NA	NA	NA	NA	NA	NA	0.6	NA	NA	NA	0.004	13	0.273	2.76	1.42	0.28	7.6	3.14	41.5	16.3	81.2	20.4	261	42.8	2373	NA	101	145	NA	98-530.5	South America	South America	Ballard et al 2002
38	0.8	NA	NA	NA	NA	NA	NA	0.52	NA	NA	NA	0.009	16	0.32	3.63	2.48	0.67	8.2	2.69	33.1	12.6	64.5	15.6	206	32	2549	NA	102	193	NA	98-530.9	South America	South America	Ballard et al 2002
38	0.8	NA	NA	NA	NA	NA	NA	6.04	NA	NA	NA	8.87	37	2.9	14.17	5.54	0.72	13.9	4.37	60.8	23.1	6.6	26.9	315	57.2	2080	NA	112	196	NA	98-530.1	South America	South America	Ballard et al 2002
38	0.8	NA	NA	NA	NA	NA	NA	0.2	NA	NA	NA	0.022	17	0.072	3.47	2.62	0.81	17.2	5.57	66.7	23.4	104.5	24	284	44.3	2300	NA	121	144	NA	98-530.3	South America	South America	Ballard et al 2002
38	0.6	NA	63	NA	NA	NA	NA	0.26	574	NA	NA	0.006	13	0.12	1.79	3.02	1.14	14.1	4.89	49.2	18	84.8	20.6	215	42.7	9044	NA	146	167	NA	165-10	South America	South America	Ballard et al 2002
38	0.8	NA	NA	NA	NA	NA	NA	0.9	NA	NA	NA	0.291	16	0.481	3.42	1.34	0.32	7.3	2.44	40.1	14.7	70	17.5	237	35.8	2395	NA	150	243	NA	98-530.2	South America	South America	Ballard et al 2002
38	0.6	NA	129	NA	NA	NA	NA	0.25	630	NA	NA	0.002	20	0.059	1.07	2.1	0.48	12.5	4.76	54.3	19.8	94.3	21.7	202	38.6	8671	NA	223	213	NA	165-6	South America	South America	Ballard et al 2002
38	0.8	NA	NA	NA	NA	NA	NA	0.59	NA	NA	NA	0.004	26	0.315	3.85	2.56	0.36	13.6	4.48	54.2	21	103.3	26.2	323	53.3	2870	NA	248	478	NA	98-530.6	South America	South America	Ballard et al 2002
38.1	0.8	NA	NA	NA	NA	NA	NA	0.4	NA	NA	NA	0.349	10	0.291	2.07	1.54	0.48	8.1	2.5	35.3	13.2	58.4	14	166	27.3	2149	NA	46	74	NA	98-565.2	South America	South America	Ballard et al 2002
38.1	0.8	NA	NA	NA	NA	NA	NA	1.83	NA	NA	NA	0.029	12	0.455	2.53	1.35	0.59	8	2.83	30.9	11.9	52.8	12.4	154	23.1	2121	NA	66	93	NA	98-565.4	South America	South America	Ballard et al 2002
38.1	0.8	NA	NA	NA	NA	NA	NA	1.14	NA	NA	NA	0.004	12	0.174	1.9	2.15	0.77	11.8	3.19	38.4	14.2	66.6	15.5	184	30.2	2169	NA	81	118	NA	98-565.5	South America	South America	Ballard et al 2002
38.1	0.8	NA	NA	NA	NA	NA	NA	1.16	NA	NA	NA	0.005	11	0.195	2.38	2.89	0.59	9	2.84	35.9	14.2	62.1	15	182	27.4	2216	NA	86	113	NA	98-565.7	South America	South America	Ballard et al 2002
38.1	0.8	NA	NA	NA	NA	NA	NA	1.22	NA	NA	NA	0.172	11	0.307	4.18	3.37	0.82	18	5.55	60.6	22.5	100.4	22.8	243	38.8	2166	NA	87	99	NA	98-565.9	South America	South America	Ballard et al 2002
38.1	0.8	NA	NA	NA	NA	NA	NA	1.1	NA	NA	NA	0.365	15	0.301	3.35	3.51	0.61	8.9	2.61	36.9	13.6	63.3	15.6	182	28.3	2263	NA	91	135	NA	98-565.3	South America	South America	Ballard et al 2002
38.1	0.8	NA	NA	NA	NA	NA	NA	0.99	NA	NA	NA	0.332	15	0.283	2.83	1.62	0.32	9.7	3	41.7	15.6	68.5	16.1	198	29.9	2334	NA	112	154	NA	98-565.6	South America	South America	Ballard et al 2002
38.1	0.8	NA	NA	NA	NA	NA	NA	0.49	NA	NA	NA	0.177	13	0.323	5.16	6.22	1.33	26	7.64	84.9	30.7	131.2	29.1	285	45.4	2062	NA	115	121	NA	98-565.10	South America	South America	Ballard et al 2002
38.1	0.8	NA	NA	NA	NA	NA	NA	0.63	NA	NA	NA	0.033	14	0.517	5.42	6.96	1.38	27.9	8.06	99.5	34	146.3	31.9	321	56.4	2001	NA	150	158	NA	98-565.1	South America	South America	Ballard et al 2002
38.1	0.8	NA	NA	NA	NA	NA	NA	0.51	NA	NA	NA	0.362	12	0.405	4.37	6.72	1.06	26.1	7.99	90.5	31.9	130.3	27	264	42.2	2124	NA	188	175	NA	98-565.8	South America	South America	Ballard et al 2002
38.18425627	1.258268854	NA	273.4734977	NA	NA	NA	NA	NA	923.2773507	NA	NA	NA	12.02046049	NA	1.527691022	3.137565552	0.796109105	NA	NA	75.40284909	NA	NA	NA	NA	69.42221185	NA	NA	223.0552635	445.8381375	NA	callen\041216\po-031	Europe	Europe	Zhu et al 2020
38.5	0.8	NA	95	NA	NA	NA	NA	0.14	244	NA	NA	0.006	9	0.003	0.26	0.83	0.17	4.9	1.7	21.1	7.6	37.2	8.9	91	17.1	9544	NA	35	61	NA	163-10	South America	South America	Ballard et al 2002
38.5	0.8	NA	206	NA	NA	NA	NA	0.17	487	NA	NA	NA	8	0.036	0.94	1.77	0.48	10	3.69	42.9	15.6	74.8	17.3	172	33.2	8242	NA	43	68	NA	163-7	South America	South America	Ballard et al 2002
38.5	0.8	NA	NA	NA	NA	NA	NA	1.55	NA	NA	NA	0.139	11	0.042	2.46	2.33	0.5	8.1	2.76	36.8	12.6	56.4	14.3	185	28.6	1533	NA	43	194	NA	98-570.5	South America	South America	Ballard et al 2002
38.5	0.8	NA	104	NA	NA	NA	NA	0.15	333	NA	NA	0	9	0.028	0.51	1.26	0.26	6.9	2.45	29	10.7	50.9	11.6	117	22.1	9471	NA	45	64	NA	121-7	South America	South America	Ballard et al 2002
38.5	0.8	NA	NA	NA	NA	NA	NA	1.3	NA	NA	NA	0.98	16	0.496	3.32	1.86	0.27	8	2.82	35.6	12.7	55.7	13.9	176	26.8	1516	NA	54	76	NA	98-570.4	South America	South America	Ballard et al 2002
38.5	0.8	NA	120	NA	NA	NA	NA	0.13	341	NA	NA	NA	10	0.014	0.43	1.14	0.37	7.3	2.63	30.2	10.7	50.9	11.8	118	21.9	8757	NA	55	81	NA	163-6	South America	South America	Ballard et al 2002
38.5	0.8	NA	107	NA	NA	NA	NA	0.13	349	NA	NA	NA	11	0.021	0.38	1.32	0.26	6.8	2.62	29.1	11.3	52.7	12.4	122	23.4	9102	NA	57	82	NA	121-10	South America	South America	Ballard et al 2002
38.5	0.8	NA	114	NA	NA	NA	NA	0.15	375	NA	NA	0.006	11	0.013	0.6	1.44	0.34	7.6	2.88	32.7	11.7	55.8	12.9	130	23.9	9169	NA	59	84	NA	163-4	South America	South America	Ballard et al 2002
38.5	0.8	NA	NA	NA	NA	NA	NA	0.45	NA	NA	NA	0.139	11	0.141	1.7	1.01	0.5	4.5	1.7	24.5	8.4	40.9	10.4	149	22.9	1862	NA	59	98	NA	98-570.1	South America	South America	Ballard et al 2002
38.5	0.8	NA	NA	NA	NA	NA	NA	0.72	NA	NA	NA	0.156	13	0.501	2.74	1.78	0.24	6	2.5	31.6	10.3	51.2	12.5	166	23.7	2151	NA	59	102	NA	98-570.10	South America	South America	Ballard et al 2002
38.5	0.8	NA	126	NA	NA	NA	NA	0.19	592	NA	NA	NA	11	0.062	1.37	3.07	0.77	15.1	5.24	54.7	19.3	87.5	19.3	185	34.4	8799	NA	63	79	NA	121-1	South America	South America	Ballard et al 2002
38.5	0.8	NA	123	NA	NA	NA	NA	0.2	526	NA	NA	0.004	10	0.038	0.94	2.09	0.57	11.7	4.27	49.2	16.9	77.9	17.4	170	32.1	8458	NA	64	78	NA	163-2	South America	South America	Ballard et al 2002
38.5	0.8	NA	150	NA	NA	NA	NA	0.21	545	NA	NA	NA	12	0.059	1.08	2.17	0.57	12.9	4.2	49.4	17.6	84.2	19.7	194	35.8	9906	NA	74	103	NA	163-9	South America	South America	Ballard et al 2002
38.5	0.8	NA	130	NA	NA	NA	NA	0.14	428	NA	NA	NA	13	0.037	0.58	1.65	0.38	9.7	3.49	39	13.6	64.3	14.5	143	26.7	9194	NA	75	95	NA	121-4	South America	South America	Ballard et al 2002
38.5	0.8	NA	NA	NA	NA	NA	NA	0.43	NA	NA	NA	0.152	11	0.46	3.24	3.52	1.29	16.1	4.89	62.5	22.7	106.1	23.5	275	46.8	1708	NA	83	108	NA	98-570.2	South America	South America	Ballard et al 2002
38.5	0.8	NA	NA	NA	NA	NA	NA	0.51	NA	NA	NA	0.106	15	0.534	2.67	2.92	0.44	9.1	3.46	46	15.3	74.7	16.5	201	31.9	1645	NA	84	118	NA	98-570.3	South America	South America	Ballard et al 2002
38.5	0.8	NA	NA	NA	NA	NA	NA	0.2	NA	NA	NA	0.025	13	0.619	5.64	6.59	1.8	23.6	7.71	96	31.1	133.7	29.5	311	51.9	1236	NA	87	101	NA	98-570.6	South America	South America	Ballard et al 2002
38.5	0.8	NA	NA	NA	NA	NA	NA	0.87	NA	NA	NA	0.01	14	0.301	2.94	3.61	0.83	12.2	4.33	52.6	17.1	79	18.7	219	32.8	2130	NA	89	104	NA	98-570.9	South America	South America	Ballard et al 2002
38.5	0.8	NA	NA	NA	NA	NA	NA	0.72	NA	NA	NA	0.011	14	0.142	2.58	1.9	0.61	7.2	2.97	38	14.7	73.5	17.8	225	35	2484	NA	89	145	NA	98-570.7	South America	South America	Ballard et al 2002
38.5	0.8	NA	123	NA	NA	NA	NA	0.4	470	NA	NA	0.011	14	0.035	0.59	1.85	0.34	9.9	3.56	41.1	15.1	69.4	16	158	28.6	9557	NA	91	120	NA	121-2	South America	South America	Ballard et al 2002
38.5	0.8	NA	152	NA	NA	NA	NA	0.17	602	NA	NA	0.001	13	0.053	1.07	2.4	0.51	13.6	4.78	54.9	19.3	89.2	20.1	192	34.7	9286	NA	99	113	NA	121-3	South America	South America	Ballard et al 2002
38.5	0.8	NA	129	NA	NA	NA	NA	0.18	592	NA	NA	0.008	14	0.072	1.77	3.13	0.57	15.3	5.02	55.3	19	86.6	19.3	185	33.6	9492	NA	101	111	NA	121-8	South America	South America	Ballard et al 2002
38.5	0.8	NA	141	NA	NA	NA	NA	0.19	565	NA	NA	0.004	16	0.058	0.87	2.23	0.48	12.5	4.51	49.4	17.6	84.7	19.4	190	36.4	9779	NA	115	157	NA	121-9	South America	South America	Ballard et al 2002
38.5	0.8	NA	128	NA	NA	NA	NA	0.21	575	NA	NA	NA	15	0.009	0.53	1.43	0.36	9.7	3.89	45.4	18.1	89	20.9	214	41.1	10384	NA	115	178	NA	121-5	South America	South America	Ballard et al 2002
38.5	0.8	NA	118	NA	NA	NA	NA	0.18	499	NA	NA	NA	15	0.031	0.66	1.56	0.23	9.1	3.62	43	15.8	77.4	18.1	178	32	10554	NA	120	170	NA	163-5	South America	South America	Ballard et al 2002
38.5	0.8	NA	169	NA	NA	NA	NA	0.21	894	NA	NA	0.016	12	0.186	2.7	4.25	1.03	21.5	7.18	82.7	29.3	135.3	30.2	286	53.3	9057	NA	123	134	NA	163-3	South America	South America	Ballard et al 2002
38.5	0.8	NA	NA	NA	NA	NA	NA	0.31	NA	NA	NA	0.336	20	0.242	3.59	2.32	0.36	8.7	3.58	45.6	17	78.3	20.2	241	38.5	2439	NA	163	250	NA	98-570.8	South America	South America	Ballard et al 2002
38.5	0.8	NA	156	NA	NA	NA	NA	0.21	653	NA	NA	0.008	13	0.093	1.28	2.68	0.32	13.6	4.99	59.5	20.6	94.7	21.6	204	36.3	10619	NA	166	346	NA	163-1	South America	South America	Ballard et al 2002
38.5	0.8	NA	184	NA	NA	NA	NA	0.29	1197	NA	NA	0.035	17	0.359	4.93	7.23	1.51	29.5	10.17	110.5	39.1	174	38.3	356	63.9	8586	NA	211	200	NA	121-6	South America	South America	Ballard et al 2002
38.5	0.8	NA	175	NA	NA	NA	NA	0.35	1617	NA	NA	0.048	17	0.411	5.5	8.52	1.92	36.7	12.58	145.6	53	243.3	52.6	492	91.2	8243	NA	277	256	NA	163-8	South America	South America	Ballard et al 2002
38.67960493	1.687669921	NA	382.9285075	NA	NA	NA	NA	NA	2352.432068	NA	NA	0.051649948	38.44787821	NA	NA	12.1391137	4.320345138	NA	NA	228.377197	NA	NA	NA	NA	119.7561374	NA	NA	288.1166571	325.7224443	NA	callen\061107\riog-158	North America	Western US	Zhu et al 2020
39.1	0.8	NA	NA	NA	NA	NA	NA	0.49	NA	NA	NA	0.333	9	0.296	2.52	1.02	0.35	7.3	2.45	27.2	9	45.4	10.9	147	19.3	2332	NA	39	68	NA	98-576.2	South America	South America	Ballard et al 2002
39.1	0.8	NA	NA	NA	NA	NA	NA	0.17	NA	NA	NA	0.018	9	0.428	4.21	2.35	0.39	12.7	2.9	43.8	14.8	70	16.1	185	28	2044	NA	57	81	NA	98-576.8	South America	South America	Ballard et al 2002
39.1	0.8	NA	NA	NA	NA	NA	NA	0.56	NA	NA	NA	0.004	12	0.219	2.74	2	0.43	6.2	1.98	28.7	11.1	54.4	12.3	169	24.7	2214	NA	59	110	NA	98-576.10	South America	South America	Ballard et al 2002
39.1	0.8	NA	NA	NA	NA	NA	NA	0.45	NA	NA	NA	0.703	11	0.221	3.52	2.69	0.66	14.1	4.36	56.7	18.6	90.1	20.1	227	35.3	2054	NA	84	114	NA	98-576.7	South America	South America	Ballard et al 2002
39.1	0.8	NA	NA	NA	NA	NA	NA	0.88	NA	NA	NA	0.009	13	0.053	2.63	1.81	0.33	10.4	3.29	44.1	14.7	73	16.2	197	30	2231	NA	88	126	NA	98-576.6	South America	South America	Ballard et al 2002
39.1	0.8	NA	NA	NA	NA	NA	NA	0.76	NA	NA	NA	0.182	13	0.307	2.74	3.14	0.34	10.2	3.23	43.1	15.3	68.5	16	192	28.7	2220	NA	89	114	NA	98-576.5	South America	South America	Ballard et al 2002
39.1	0.8	NA	NA	NA	NA	NA	NA	0.54	NA	NA	NA	0.014	16	0.069	3.47	3.24	0.41	13.3	4.8	66.3	23.6	106.3	24.2	281	45.2	2683	NA	126	167	NA	98-576.1	South America	South America	Ballard et al 2002
39.1	0.8	NA	NA	NA	NA	NA	NA	0.22	NA	NA	NA	0.019	14	0.37	4.43	5.6	0.77	15.8	5.23	66.2	22.3	102.4	23.3	254	41.7	2319	NA	128	153	NA	98-576.4	South America	South America	Ballard et al 2002
39.1	0.8	NA	NA	NA	NA	NA	NA	0.34	NA	NA	NA	0.327	20	0.431	8.06	9.66	1.98	44.2	13.52	156.6	55.5	243	51.4	511	86.5	2081	NA	306	263	NA	98-576.9	South America	South America	Ballard et al 2002
39.1	0.8	NA	NA	NA	NA	NA	NA	0.93	NA	NA	NA	0.044	20	0.51	6.45	8.75	1.69	38.8	11.55	147.6	50.2	216	47.3	459	79.7	2338	NA	323	279	NA	98-576.3	South America	South America	Ballard et al 2002
39.33032852	1.171852227	NA	155.7180421	NA	NA	NA	NA	NA	702.466519	NA	NA	0.065730477	29.59529692	NA	0.745909059	1.66218397	0.718797589	NA	NA	49.74232677	NA	NA	NA	NA	74.43171105	NA	NA	396.645577	713.3274149	NA	callen\041216\po-035	Europe	Europe	Zhu et al 2020
39.57484234	25.05722828	NA	NA	NA	NA	NA	NA	NA	NA	NA	NA	NA	28.4392	0.2434	0.54	1.593	0.6918	12.5117	4.5318	65.694	25.722	137.69994	29.88	278.999952	59.4999972	NA	NA	119	147	NA	199453 17d	Australia	Southern Australia	Barham et al 2019
39.8958879	0.999785263	NA	382.7932631	NA	NA	NA	NA	NA	1662.856874	NA	NA	NA	37.52662027	NA	NA	2.940698338	0.79048971	NA	NA	103.1585503	NA	NA	NA	NA	141.4527553	NA	NA	728.8861887	1637.093006	NA	yoshi\081217\mss-111	North America	Eastern US	Zhu et al 2020
40.2	1	NA	176	NA	NA	NA	NA	0.41	1889	NA	NA	0.026	22	0.308	5.62	10.4	3.08	48	17.02	182.5	63.8	278	60	576	101.1	8569	NA	359	286	NA	180-9	South America	South America	Ballard et al 2002
40.2	1	NA	189	NA	NA	NA	NA	0.42	1774	NA	NA	0.033	22	0.324	4.8	9.21	2.64	44.6	15.43	168.4	60.2	273.1	60.5	575	106.5	9062	NA	367	479	NA	180-5	South America	South America	Ballard et al 2002
40.2	1	NA	201	NA	NA	NA	NA	0.38	1394	NA	NA	0.017	25	0.163	2.6	5.89	1.69	32.3	11.35	128.4	47	221.7	48.8	489	91.8	11325	NA	400	933	NA	180-3	South America	South America	Ballard et al 2002
40.2	1	NA	195	NA	NA	NA	NA	0.44	1835	NA	NA	0.058	23	0.205	3.23	6.64	1.54	31.7	12.87	148.8	55.2	253.4	56.1	565	103.3	9986	NA	494	636	NA	180-6	South America	South America	Ballard et al 2002
40.2	1	NA	191	NA	NA	NA	NA	0.5	2326	NA	NA	0.024	27	0.319	6.31	11.89	3.06	58.1	20.48	219.8	77.9	347.5	74.9	716	123.9	9754	NA	562	466	NA	180-8	South America	South America	Ballard et al 2002
40.2	1	NA	295	NA	NA	NA	NA	0.57	2889	NA	NA	0.052	39	0.475	7.73	15.3	4.39	74.8	26.23	279	99.6	432.2	93.2	882	156.9	7886	NA	730	442	NA	180-7	South America	South America	Ballard et al 2002
40.2	1	NA	313	NA	NA	NA	NA	0.63	3423	NA	NA	0.097	41	0.565	9.75	19.65	5.37	96.4	32.11	330.1	114.7	506.1	107.7	987	176.7	8134	NA	836	653	NA	180-2	South America	South America	Ballard et al 2002
40.2	1	NA	176	NA	NA	NA	NA	0.71	2021	NA	NA	0.016	40	0.139	2.94	6.61	1.26	34.8	14.37	164.1	62.6	300.4	72.2	740	130	13086	NA	947	1575	NA	180-10	South America	South America	Ballard et al 2002
40.2	1	NA	327	NA	NA	NA	NA	0.72	3952	NA	NA	0.073	46	0.649	11.26	21.57	6.41	108	37.8	394	136.4	593.4	124.1	1173	205.7	8335	NA	1015	629	NA	180-4	South America	South America	Ballard et al 2002
40.2	1	NA	236	NA	NA	NA	NA	0.34	1507	NA	NA	0.013	53	0.176	2.88	5.63	1.21	30.9	11.64	131.4	48.6	228	50.7	495	89.5	9731	NA	1432	1199	NA	180-1	South America	South America	Ballard et al 2002
40.6	0.6	NA	173	NA	NA	NA	NA	0.17	580	NA	NA	0.005	9	0.085	1.52	3.05	0.51	14.4	4.86	54.6	18.4	85.7	19.2	186	33.1	8906	NA	91	95	NA	131-7	South America	South America	Ballard et al 2002
40.6	0.6	NA	144	NA	NA	NA	NA	0.2	619	NA	NA	0.012	12	0.047	1.04	2.23	0.44	12.9	4.77	56.4	20	93	20.6	199	35.1	9473	NA	109	123	NA	131-10	South America	South America	Ballard et al 2002
40.6	0.6	NA	164	NA	NA	NA	NA	0.22	746	NA	NA	0.007	12	0.117	1.87	3.11	0.62	16.1	5.86	67.1	23.8	113.8	25.4	244	42.8	10226	NA	128	159	NA	131-9	South America	South America	Ballard et al 2002
40.6	0.6	NA	136	NA	NA	NA	NA	0.2	853	NA	NA	0.005	12	0.12	2.2	4.7	0.84	21.7	7.6	80.2	27.4	124	27	247	43	9414	NA	138	134	NA	131-6	South America	South America	Ballard et al 2002
40.6	0.6	NA	164	NA	NA	NA	NA	0.28	900	NA	NA	NA	14	0.093	1.83	3.27	0.69	18.1	6.58	77.4	28.1	137.4	31.8	315	58.8	9640	NA	197	234	NA	131-4	South America	South America	Ballard et al 2002
40.6	0.6	NA	212	NA	NA	NA	NA	0.22	905	NA	NA	0.018	15	0.182	2.41	4.04	0.7	20.5	7.47	82.2	29.2	133.2	29.6	279	50.1	8284	NA	209	214	NA	131-1	South America	South America	Ballard et al 2002
40.6	0.6	NA	238	NA	NA	NA	NA	0.39	1724	NA	NA	0.032	21	0.344	4.97	8.76	1.29	41.4	14.31	161.2	55.8	252.8	54.2	509	88	8517	NA	445	361	NA	131-8	South America	South America	Ballard et al 2002
40.6	0.6	NA	205	NA	NA	NA	NA	0.42	2067	NA	NA	0.072	18	0.443	6.61	9.92	1.66	48.3	17	194.7	68.5	310.5	64.7	589	103.1	8291	NA	506	380	NA	131-3	South America	South America	Ballard et al 2002
40.90439505	1.090140506	NA	1159.282842	NA	NA	NA	NA	NA	4700.388678	NA	NA	0.436460331	81.23349405	NA	NA	12.24924532	2.98041671	NA	NA	446.6959003	NA	NA	NA	NA	219.0815971	NA	NA	518.4833354	739.5784324	NA	callen\061107\riog-189	North America	Western US	Zhu et al 2020
41.3	0.8	NA	106	NA	NA	NA	NA	0.17	386	NA	NA	0.011	7	0.027	0.73	1.7	0.27	8	2.9	33.9	12.2	58.9	13.3	131	23.2	7778	NA	64	93	NA	174-4	South America	South America	Ballard et al 2002
41.3	0.8	NA	64	NA	NA	NA	NA	0.21	322	NA	NA	0.007	8	0.025	0.75	1.65	0.28	7.2	2.42	28.9	10.2	48.6	11.8	128	27.5	9604	NA	69	614	NA	174-6	South America	South America	Ballard et al 2002
41.3	0.8	NA	107	NA	NA	NA	NA	0.14	469	NA	NA	0.005	8	0.035	0.74	1.83	0.36	9.8	3.48	42.2	14.7	69.4	15.6	156	27.3	8064	NA	71	88	NA	174-10	South America	South America	Ballard et al 2002
41.3	0.8	NA	95	NA	NA	NA	NA	0.18	423	NA	NA	0.003	9	0.035	0.52	1.42	0.2	8.8	3.24	37	13.2	63.8	14.6	145	25.6	8585	NA	78	108	NA	174-9	South America	South America	Ballard et al 2002
41.3	0.8	NA	98	NA	NA	NA	NA	0.14	384	NA	NA	0.004	9	0.028	0.64	1.23	0.18	7.3	3.07	33.5	12.1	57.2	12.8	128	22.6	8323	NA	80	106	NA	174-7	South America	South America	Ballard et al 2002
41.3	0.8	NA	109	NA	NA	NA	NA	0.21	429	NA	NA	NA	9	0.019	0.76	1.9	0.32	9.5	3.21	39.9	13.8	63.2	14.5	141	24.9	8456	NA	83	104	NA	174-8	South America	South America	Ballard et al 2002
41.3	0.8	NA	111	NA	NA	NA	NA	0.15	413	NA	NA	0.007	9	0.042	0.56	1.75	0.26	8	3.16	35.8	13.1	61.9	14.3	136	24.3	8389	NA	85	118	NA	174-5	South America	South America	Ballard et al 2002
41.3	0.8	NA	128	NA	NA	NA	NA	0.17	610	NA	NA	NA	10	0.09	1.37	2.63	0.47	14	5.03	56.7	20	89.2	20	189	32.3	8445	NA	119	143	NA	174-3	South America	South America	Ballard et al 2002
41.3	0.8	NA	123	NA	NA	NA	NA	0.21	795	NA	NA	0.055	10	0.312	4.55	6.51	0.8	24.2	7.6	79.6	25.7	110.7	23.5	213	35.3	8682	NA	138	135	NA	174-2	South America	South America	Ballard et al 2002
41.3	0.8	NA	140	NA	NA	NA	NA	0.26	1056	NA	NA	0.044	11	0.403	5.53	7.11	1.17	29.8	9.39	99.4	33.7	151.2	32.5	284	49.6	7685	NA	171	164	NA	174-1	South America	South America	Ballard et al 2002
41.32274954	13.63627074	NA	174.2975658	18.44808199	NA	NA	NA	NA	901.4480398	NA	12.28134592	2.545413581	13.64525682	0.750413115	6.104199522	6.472942456	0.118623609	21.21890545	7.449773904	88.40018666	32.20043284	132.0868727	31.53004657	329.439657	42.16135243	12924.33498	6.037961679	83.83007036	157.9935421	NA	13MFT-7 SPOT 614	North America	Western North America	Rivera et al 2016
42.17999361	20.79993967	NA	169.4236328	12.26170533	NA	NA	NA	NA	1711.107806	NA	3.952827628	9.067003083	9.660126463	2.552953194	15.66181495	17.34656493	2.718858269	63.50183045	20.28680768	214.6626203	68.66489415	266.1663521	52.77642391	470.2006715	62.08235445	8869.319816	1.892721484	76.46407977	75.33225065	NA	13MFT-4 SPOT 443	North America	Western North America	Rivera et al 2016
42.3	0.4	NA	230	NA	NA	NA	NA	0.58	1068	NA	NA	0.106	18	0.136	1.8	3.57	0.31	19.6	7.5	87.5	33.3	156	33	308	59.7	9786	NA	227	358	NA	521-08	South America	South America	Ballard et al 2002
42.3	0.4	NA	259	NA	NA	NA	NA	0.33	1498	NA	NA	0.024	15	0.211	3.49	6.43	0.54	35.7	12.37	137.3	49	212.6	42.4	374	68.9	7948	NA	282	324	NA	521-07	South America	South America	Ballard et al 2002
42.3	0.4	NA	290	NA	NA	NA	NA	0.23	1226	NA	NA	0.011	21	0.172	2.68	5.34	0.48	27.1	9.53	107.2	38.9	175	35.6	308	57.3	7949	NA	339	365	NA	521-03	South America	South America	Ballard et al 2002
42.3	0.4	NA	351	NA	NA	NA	NA	0.37	1794	NA	NA	0.009	25	0.156	2.76	5.44	0.51	30.6	11.48	139.4	55.3	269.7	57.7	525	102.8	8020	NA	399	603	NA	521-05	South America	South America	Ballard et al 2002
42.3	0.4	NA	237	NA	NA	NA	NA	0.42	2249	NA	NA	0.047	20	0.485	6.88	10.76	0.83	54	18.89	208.6	72.4	314.1	61.5	525	93.7	8943	NA	456	433	NA	521-09	South America	South America	Ballard et al 2002
42.3	0.4	NA	318	NA	NA	NA	NA	0.31	2033	NA	NA	0.037	19	0.425	5.95	11.9	1.3	60.2	19.45	206.7	69.1	286.8	55.2	454	79.1	7128	NA	485	393	NA	521-04	South America	South America	Ballard et al 2002
42.3	0.4	NA	338	NA	NA	NA	NA	0.32	1515	NA	NA	0.006	28	0.204	3.54	6.11	0.48	32.6	11.6	130.3	47.2	215.5	43.9	386	72.9	8821	NA	540	541	NA	521-02	South America	South America	Ballard et al 2002
42.3	0.4	NA	226	NA	NA	NA	NA	0.46	2275	NA	NA	0.029	25	0.413	6.68	11.47	0.79	50.3	17.93	202	73.2	327.4	64.8	561	102.4	10067	NA	584	604	NA	521-10	South America	South America	Ballard et al 2002
42.3	0.4	NA	388	NA	NA	NA	NA	0.39	1849	NA	NA	0.021	25	0.183	3.31	6.58	0.57	33.9	12.81	150.4	57.7	276.5	57.8	517	97.4	7327	NA	588	627	NA	521-06	South America	South America	Ballard et al 2002
42.31954992	1.021089292	NA	323.5953163	NA	NA	NA	NA	NA	NA	NA	NA	NA	179.4536403	NA	5.455207939	12.93240254	3.779608533	NA	NA	226.7138547	NA	NA	NA	NA	86.74391722	NA	NA	1364.097552	638.8048778	NA	callen\020917\CR-001	North America	Western US	Zhu et al 2020
42.37763204	0.987794085	NA	214.2112664	NA	NA	NA	NA	NA	815.6523384	NA	NA	0.031700057	12.82306189	NA	NA	2.66855404	0.92625721	NA	NA	61.76960215	NA	NA	NA	NA	67.12027214	NA	NA	149.2392344	521.7639789	NA	callen\061107\riog-149	North America	Western US	Zhu et al 2020
42.4	2.8	NA	NA	NA	NA	NA	NA	NA	NA	NA	NA	0.003	3.8	0.013	0.37	1.7	0.194	7.4	3.3	49	19.3	101	25.2	278	40.2	14400	NA	48	2100	SFB38	SFB38_118.FIN2	Europe	Europe	Anfinson et al 2020
42.88886821	1.480873559	NA	272.547635	NA	NA	NA	NA	NA	NA	NA	NA	0.081867289	19.5827603	NA	1.271418537	NA	0.646110357	NA	NA	61.73131507	NA	NA	NA	NA	48.02682275	NA	NA	135.2236357	210.6656696	NA	callen\010726\NEG-094	South America	South America	Zhu et al 2020
42.9	1	NA	121	NA	NA	NA	NA	0.23	988	NA	NA	0.003	15	0.089	2.07	4.21	0.35	23.8	8.52	92	32.7	142.6	30.9	286	49.5	10232	NA	271	312	NA	195-5	South America	South America	Ballard et al 2002
42.9	1	NA	165	NA	NA	NA	NA	0.26	1444	NA	NA	0.034	19	0.424	6.2	9.91	0.72	42.2	13.9	142.7	48.4	208.7	43.3	389	65.4	9573	NA	436	434	NA	195-9	South America	South America	Ballard et al 2002
42.9	1	NA	196	NA	NA	NA	NA	0.36	1735	NA	NA	0.074	15	0.532	6.95	10.38	0.95	47.4	15.94	164.7	57.2	247	50.1	445	76.5	8836	NA	493	445	NA	195-10	South America	South America	Ballard et al 2002
42.9	1	NA	170	NA	NA	NA	NA	0.35	1609	NA	NA	0.068	15	0.546	7.23	10.15	0.87	42.1	14.52	153.4	53.7	228.6	46	408	70.1	8515	NA	494	453	NA	195-1	South America	South America	Ballard et al 2002
42.9	1	NA	153	NA	NA	NA	NA	0.31	1545	NA	NA	0.062	20	0.574	7.82	11.32	0.82	46.1	15.04	153.9	51.9	222	45.8	412	69.1	9855	NA	498	506	NA	195-4	South America	South America	Ballard et al 2002
42.9	1	NA	149	NA	NA	NA	NA	0.37	1596	NA	NA	0.068	21	0.623	8.55	11.33	0.69	45.9	15.04	156.4	53.4	228.1	47.4	425	71.3	10012	NA	531	555	NA	195-6	South America	South America	Ballard et al 2002
42.9	1	NA	153	NA	NA	NA	NA	0.29	1563	NA	NA	0.036	21	0.469	7.14	10.81	0.68	45.2	14.91	153.4	52.1	222.6	46.2	412	69.7	10070	NA	533	544	NA	195-2	South America	South America	Ballard et al 2002
42.9	1	NA	177	NA	NA	NA	NA	0.37	1809	NA	NA	0.105	18	0.646	8.51	11.92	0.73	48	15.53	165.9	58.9	258.2	52	464	78.7	8968	NA	668	684	NA	195-8	South America	South America	Ballard et al 2002
42.9	1	NA	261	NA	NA	NA	NA	0.51	2068	NA	NA	0.012	49	0.149	3.18	6.6	0.25	35	14.59	173.9	66.1	314.2	72	684	116.9	14007	NA	1331	3636	NA	195-7	South America	South America	Ballard et al 2002
42.98412228	1.6267029	NA	216.9438115	NA	NA	NA	NA	NA	604.557699	NA	NA	0.216171726	15.09947343	NA	0.945146722	1.776322113	0.527258358	NA	NA	51.31012827	NA	NA	NA	NA	45.38308632	NA	NA	130.1270687	188.9540149	NA	callen\041216\po-099	Europe	Europe	Zhu et al 2020
43.74046434	2.059182413	NA	121.7881783	NA	NA	NA	NA	NA	362.9876703	NA	NA	NA	12.86078604	NA	0.879129263	1.348569479	0.628757605	NA	NA	28.55004436	NA	NA	NA	NA	32.01178468	NA	NA	49.7537265	159.6255875	NA	callen\050127\m0-200	North America	Eastern US	Zhu et al 2020
44.19171186	31.4548595	NA	NA	NA	NA	NA	NA	NA	NA	NA	NA	0.464	25.999824	0.662	5.562	4.515	1.6215	17.29995	5.3999976	67.636	24.999972	124.49997	27.18	278.999952	59.9999988	NA	NA	26	468	NA	199453 13d	Australia	Southern Australia	Barham et al 2019
44.78098806	1.032831368	NA	271.3586527	NA	NA	NA	NA	NA	NA	NA	NA	0.083330279	14.32139468	NA	0.75931903	2.152642167	1.032016448	NA	NA	72.55233493	NA	NA	NA	NA	79.19730543	NA	NA	175.9807431	631.2121807	NA	callen\030114\jo7-053	South America	South America	Zhu et al 2020
46.1	0.4	NA	NA	2.52	NA	NA	NA	0.79	2863	NA	6.89	0.034	45.1	0.615	9.24	14.8	7.81	64.8	20.7	251.3	85.3	391	86.5	796	134	4251	2.87	768	651	NA	WRT1.2.1	Australia	Eastern Australia	Sutherland et al 2016
46.2617121	1.077185897	NA	354.5870051	NA	NA	NA	NA	NA	NA	NA	NA	0.042905352	10.32262344	NA	1.174051495	2.650405686	0.973664389	NA	NA	90.31372424	NA	NA	NA	NA	84.49605372	NA	NA	169.8132358	468.4532621	NA	callen\030114\jo4-019	South America	South America	Zhu et al 2020
46.41022363	1.451624755	NA	293.5337972	NA	NA	NA	NA	NA	NA	NA	NA	NA	5.528581982	NA	4.427560764	9.556811018	1.074147028	NA	NA	202.139094	NA	NA	NA	NA	99.32141798	NA	NA	152.8090386	346.5149529	NA	callen\020917\CR-138	North America	Western US	Zhu et al 2020
46.42816981	66.23249656	NA	NA	NA	NA	NA	NA	NA	NA	NA	NA	NA	1.61344	0.15982	NA	NA	0.1425	4.9997	1.26	16.828	5.8199644	28.89999	5.7672	55.448	9.539996	NA	NA	4	95	NA	199453 119d	Australia	Southern Australia	Barham et al 2019
47.05847208	1.211811357	NA	506.2913073	NA	NA	NA	NA	NA	1720.351454	NA	NA	0.120837079	28.3209301	NA	1.394615307	3.989290032	1.496950807	NA	NA	172.5564077	NA	NA	NA	NA	96.6487179	NA	NA	863.3892507	2301.599974	NA	lucy\050609\YNG-113	Asia	China	Zhu et al 2020
47.15572966	1.452473612	NA	138.8305606	NA	NA	NA	NA	NA	859.9685546	NA	NA	NA	3.962455731	NA	NA	6.736212667	1.419113897	NA	NA	89.65440581	NA	NA	NA	NA	43.05827474	NA	NA	87.86857487	137.9732368	NA	callen\050707\npl-049	North America	Western US	Zhu et al 2020
48.0495899	1.369133885	NA	194.2907692	NA	NA	NA	NA	NA	NA	NA	NA	0.932402896	47.3442596	NA	18.44358482	27.13999687	0.12051007	NA	NA	275.41094	NA	NA	NA	NA	99.04293866	NA	NA	571.5441281	500.2962929	NA	callen\020917\CR-030	North America	Western US	Zhu et al 2020
48.20382758	1.857402072	NA	163.5459975	NA	NA	NA	NA	NA	NA	NA	NA	NA	8.493163255	NA	1.918749558	3.626737874	0.449470988	NA	NA	63.07110241	NA	NA	NA	NA	33.23074441	NA	NA	67.22212856	96.88003561	NA	callen\020917\CR-106	North America	Western US	Zhu et al 2020
48.42395264	25.11042484	NA	NA	NA	NA	NA	NA	NA	NA	NA	NA	0.43989	2.5548	0.19228	0.792	1.593	NA	1.5119	5.689998	81.599952	34.5999892	179.1	38.6999856	37.15	75.714	NA	NA	31.5	173	NA	199453 13d	Australia	Southern Australia	Barham et al 2019
48.53580672	1.151844543	NA	168.6498829	NA	NA	NA	NA	NA	NA	NA	NA	0.152706846	21.06070502	NA	10.44399761	11.05354642	3.521935106	NA	NA	123.486738	NA	NA	NA	NA	76.64883061	NA	NA	547.3378875	467.9385193	NA	callen\020917\CR-142	North America	Western US	Zhu et al 2020
48.91796263	1.404966696	NA	283.9359467	NA	NA	NA	NA	NA	NA	NA	NA	NA	32.44378578	NA	1.071213247	3.198949429	0.293465109	NA	NA	130.7532105	NA	NA	NA	NA	105.6914258	NA	NA	249.641299	684.4348755	NA	callen\020917\CR-071	North America	Western US	Zhu et al 2020
48.96810582	1.208258112	NA	244.2798383	NA	NA	NA	NA	NA	NA	NA	NA	0.363788358	40.16257209	NA	7.990462486	9.609910035	3.126360971	NA	NA	97.80886761	NA	NA	NA	NA	50.87774386	NA	NA	433.1647271	324.0390274	NA	callen\020917\CR-078	North America	Western US	Zhu et al 2020
49.9212402	1.524356672	NA	178.0137714	NA	NA	NA	NA	NA	629.9179939	NA	NA	NA	7.220166296	NA	NA	3.402883802	0.902100218	NA	NA	56.39900612	NA	NA	NA	NA	36.0250851	NA	NA	81.75352995	191.7922078	NA	callen\050907\clo-053	North America	Western US	Zhu et al 2020
50.12277784	1.491337389	NA	234.8736062	NA	NA	NA	NA	NA	NA	NA	NA	NA	24.15629402	NA	4.589061628	8.403990807	1.459621483	NA	NA	159.7895239	NA	NA	NA	NA	109.9556057	NA	NA	913.25612	941.6562701	NA	callen\020917\CR-033	North America	Western US	Zhu et al 2020
50.20342924	1.184722073	NA	169.8977669	NA	NA	NA	NA	NA	NA	NA	NA	0.081596307	7.406673259	NA	2.086211999	0.354964719	59.81880912	NA	NA	91.25386995	NA	NA	NA	NA	39.24966908	NA	NA	201.251604	207.4628073	NA	CALLEN\010827\IND-020	Asia	Southern Asia	Zhu et al 2020
50.38651653	1.339124285	NA	147.0584958	NA	NA	NA	NA	NA	NA	NA	NA	NA	9.735512231	NA	1.498237541	3.558977783	0.109933494	NA	NA	68.40634853	NA	NA	NA	NA	32.11648393	NA	NA	91.1718192	222.1858134	NA	callen\020917\CR-064	North America	Western US	Zhu et al 2020
50.79565875	1.226765157	NA	374.3904798	NA	NA	NA	NA	NA	NA	NA	NA	0.118019381	40.06643205	NA	8.769396477	20.25363369	0.579641486	NA	NA	429.85398	NA	NA	NA	NA	147.4460136	NA	NA	629.9681399	933.3819026	NA	callen\020917\CR-056	North America	Western US	Zhu et al 2020
51.51903584	1.441015386	NA	135.662716	NA	NA	NA	NA	NA	NA	NA	NA	0.047998231	10.83072735	NA	4.01706231	7.66460709	0.116156809	NA	NA	112.7547397	NA	NA	NA	NA	43.29773396	NA	NA	118.917927	252.7964231	NA	callen\020917\CR-040	North America	Western US	Zhu et al 2020
51.92761608	1.338438372	NA	140.4454171	NA	NA	NA	NA	NA	NA	NA	NA	0.07151347	18.6896965	NA	6.918358335	9.094258827	1.537858084	NA	NA	130.8997298	NA	NA	NA	NA	86.26425255	NA	NA	518.032621	650.1822692	NA	callen\020917\CR-082	North America	Western US	Zhu et al 2020
51.94191589	1.765671923	NA	154.4337201	NA	NA	NA	NA	NA	NA	NA	NA	0.487991197	9.20609868	NA	1.826637916	2.702806564	0.614733659	NA	NA	46.82345311	NA	NA	NA	NA	39.44435853	NA	NA	128.2534911	312.2260036	NA	callen\020917\CR-060	North America	Western US	Zhu et al 2020
53.16655999	1.63005954	NA	148.7467368	NA	NA	NA	NA	NA	NA	NA	NA	0.086106546	12.50189505	NA	5.529463696	6.528507397	2.858717014	NA	NA	63.45895549	NA	NA	NA	NA	26.34075647	NA	NA	178.6993929	111.0113042	NA	callen\020917\CR-128	North America	Western US	Zhu et al 2020
54.6145979	2.062005731	NA	278.6312663	NA	NA	NA	NA	NA	NA	NA	NA	NA	17.62349438	NA	2.383936636	4.057218593	0.712480065	NA	NA	54.52730042	NA	NA	NA	NA	29.68899893	NA	NA	72.08237699	102.4328833	NA	callen\020917\CR-127	North America	Western US	Zhu et al 2020
54.99678931	2.063511524	NA	219.812819	NA	NA	NA	NA	NA	NA	NA	NA	0.108533291	4.132224223	NA	2.215021476	0.964643289	122.6497695	NA	NA	197.8462434	NA	NA	NA	NA	70.83695996	NA	NA	109.3392997	119.779827	NA	CALLEN\010827\IND-057	Asia	Southern Asia	Zhu et al 2020
55.24542191	2.376597433	NA	148.2036354	NA	NA	NA	NA	NA	NA	NA	NA	NA	9.706242546	NA	3.471787894	7.496153861	0.57401875	NA	NA	120.7452308	NA	NA	NA	NA	44.20763083	NA	NA	74.05568678	120.0387395	NA	callen\020917\CR-121	North America	Western US	Zhu et al 2020
57	1	NA	619.83	6.1	NA	402.21	1.902	2.71	953.09	NA	7.35	7.9	41.81	3.46	19.32	6.57	1.481	18.58	6.09	79.38	30.19	150.08	35.15	350.29	62.22	9384.9	3.31	266	1003	Gn-1065b	A93	Europe	Europe	Kozlik et al 2016
57.85201393	1.203673267	NA	27.68513086	NA	NA	NA	NA	NA	NA	NA	NA	0.043996658	62.4527926	NA	5.529570643	4.738125037	191.3198378	NA	NA	397.7656619	NA	NA	NA	NA	191.1817549	NA	NA	2195.060192	1166.824677	NA	CALLEN\010827\IND-037	Asia	Southern Asia	Zhu et al 2020
58.25088868	1.36211191	NA	280.1175097	NA	NA	NA	NA	NA	NA	NA	NA	NA	14.85607077	NA	2.273722552	0.2564119	75.0489355	NA	NA	119.6847905	NA	NA	NA	NA	45.69341939	NA	NA	116.1024562	179.5248699	NA	CALLEN\010827\IND-046	Asia	Southern Asia	Zhu et al 2020
58.9187869	1.281058466	NA	104.2153512	NA	NA	NA	NA	NA	NA	NA	NA	NA	6.964467822	NA	0.609762106	0.310850859	20.79017602	NA	NA	50.48396427	NA	NA	NA	NA	42.49480928	NA	NA	357.8831121	520.1539397	NA	CALLEN\010827\IND-124	Asia	Southern Asia	Zhu et al 2020
59.75605987	3.171155839	NA	190.2818075	NA	NA	NA	NA	NA	NA	NA	NA	NA	4.198320587	NA	0.658325534	0.586375524	28.4353805	NA	NA	59.18558418	NA	NA	NA	NA	38.27790689	NA	NA	68.7504702	84.59586008	NA	CALLEN\010827\IND-096	Asia	Southern Asia	Zhu et al 2020
60.4	2	NA	NA	1.52	NA	NA	NA	0.253	590	NA	3.63	0.013	1.78	0.132	1.59	2.27	0.96	9.23	3.42	45.5	16.2	81.3	20.2	207	37.1	6058	2.16	39.5	74.7	NA	YAR5a.6.1	Australia	Eastern Australia	Sutherland et al 2016
60.6	1.3	NA	NA	3.5	NA	NA	NA	0.482	1242	NA	17.01	0.007	16	0.093	1.45	2.99	2.11	16.5	6.47	90.6	34.7	178.9	44.6	453	81.7	5606	5.35	156	221	NA	YAR5a.3.1	Australia	Eastern Australia	Sutherland et al 2016
61.54133053	35.90433855	NA	117.611724	13.14732773	NA	NA	NA	NA	523.1912742	NA	7.609250283	0.207018748	8.132723713	0.197549648	0.815875937	2.319038779	0.319807181	11.72458486	4.629437756	59.99077787	21.05023822	80.61637881	22.05169869	230.4920501	21.80294277	8561.515014	3.537850858	53.67594467	102.7965945	NA	13MFT-2 SPOT 313	North America	Western North America	Rivera et al 2016
62.3	4.3	NA	217	8.9	NA	NA	NA	NA	NA	435400	31.8	0.0044	8.28	NA	0.57	NA	0.275	NA	NA	69.6	NA	NA	NA	NA	57.4	12580	0.409	45.5	78	NA	Detrital824C_82	Australia	Eastern Australia	Shaanan et al 2018
62.3	1.4	NA	NA	3.11	NA	NA	NA	0.37	894	NA	10.44	0.005	10.6	0.064	1.02	2.11	1.44	11.2	4.42	62.4	24.4	128.7	32.4	333	61.9	5355	4.48	88.8	140	NA	YAR5a.2.1	Australia	Eastern Australia	Sutherland et al 2016
62.32218932	1.590756451	NA	478.3406206	NA	NA	NA	NA	NA	NA	NA	NA	NA	30.04773582	NA	5.478502908	11.64686577	3.803280825	NA	NA	141.871708	NA	NA	NA	NA	57.89550694	NA	NA	209.8295052	593.0885729	NA	callen\020917\CR-025	North America	Western US	Zhu et al 2020
62.38172893	1.594482832	NA	1210.128817	NA	NA	NA	NA	NA	NA	NA	NA	0.167283748	14.67687257	NA	1.132780573	0.655790807	160.1142099	NA	NA	329.9449672	NA	NA	NA	NA	165.1455335	NA	NA	184.6076888	322.6378035	NA	CALLEN\010827\IND-099	Asia	Southern Asia	Zhu et al 2020
62.4	1.8	NA	NA	45.47	NA	NA	NA	0.439	1359	NA	4.8	0.009	36.7	0.087	1.63	4.01	2.54	23	8.51	112.7	40.8	194	43.6	400	66.5	7301	2.06	103	123	NA	YAR5c.2.1	Australia	Eastern Australia	Sutherland et al 2016
62.9	1.4	NA	NA	4.88	NA	NA	NA	0.367	975	NA	23.81	0.024	11.2	0.136	2.17	3.82	2.5	17.3	5.87	76.2	27.9	139	33.7	337	61.4	5149	7.37	149	172	NA	YAR5b.2.1	Australia	Eastern Australia	Sutherland et al 2016
63.2	1	NA	129	NA	NA	NA	NA	0.16	394	NA	NA	0.002	8	0.039	0.7	1.56	0.23	8.2	2.96	34.2	12.5	58.2	12.9	123	21.9	9032	NA	55	82	NA	626-8	South America	South America	Ballard et al 2002
63.2	1	NA	139	NA	NA	NA	NA	0.15	448	NA	NA	0.007	8	0.051	0.83	1.75	0.27	9.7	3.54	40.9	14.6	65.3	14.9	137	24.8	8803	NA	66	92	NA	626-5	South America	South America	Ballard et al 2002
63.2	1	NA	177	NA	NA	NA	NA	0.22	564	NA	NA	0.056	8	0.075	0.99	2.04	0.34	12.4	4.5	51.7	17.9	81.5	17.9	166	28.8	8773	NA	73	90	NA	626-9	South America	South America	Ballard et al 2002
63.2	1	NA	145	NA	NA	NA	NA	0.2	693	NA	NA	0.015	9	0.172	2.82	4.31	0.53	19.2	6.2	69.2	22.9	99.7	21.2	191	33	8890	NA	86	97	NA	626-7	South America	South America	Ballard et al 2002
63.2	1	NA	163	NA	NA	NA	NA	0.21	700	NA	NA	0.01	8	0.109	1.82	3.35	0.52	17.4	6.04	67.1	22.6	100.5	21.6	196	34	8562	NA	87	100	NA	626-2	South America	South America	Ballard et al 2002
63.2	1	NA	172	NA	NA	NA	NA	0.2	725	NA	NA	0.013	9	0.137	2	3.76	0.52	18.8	6.29	69.5	23.4	102.9	21.9	199	34.7	8854	NA	90	100	NA	626-6	South America	South America	Ballard et al 2002
63.2	1	NA	190	NA	NA	NA	NA	0.24	756	NA	NA	0.011	9	0.098	1.55	3.27	0.5	18.3	6.47	71.3	24.4	108.1	22.8	210	35.5	9348	NA	92	103	NA	626-10	South America	South America	Ballard et al 2002
63.2	1	NA	163	NA	NA	NA	NA	0.18	779	NA	NA	0.02	9	0.24	3.48	5.06	0.73	22.7	7.21	76.2	25.6	108.6	23.4	207	35.7	8992	NA	93	102	NA	626-4	South America	South America	Ballard et al 2002
63.2	1	NA	147	NA	NA	NA	NA	0.25	1111	NA	NA	0.073	12	0.531	6.99	9.26	1.24	35.1	11.33	114	37.5	154.2	32.1	277	47.1	8613	NA	147	137	NA	626-1	South America	South America	Ballard et al 2002
63.2	1	NA	158	NA	NA	NA	NA	0.27	1138	NA	NA	0.061	13	0.514	7.09	9.65	1.07	37.3	11.66	117.9	38.3	157.3	32.4	280	47.2	8701	NA	150	134	NA	626-3	South America	South America	Ballard et al 2002
63.26833067	2.037834788	NA	91.36472269	NA	NA	NA	NA	NA	NA	NA	NA	NA	14.80279136	NA	0.570854846	1.337018865	0.65111839	NA	NA	21.02138182	NA	NA	NA	NA	21.10466067	NA	NA	29.99600341	148.1465324	NA	callen\020917\CR-113	North America	Western US	Zhu et al 2020
63.9	1.4	NA	NA	1.17	NA	NA	NA	0.257	609	NA	4.46	0.007	5.22	0.05	0.7	1.47	1	7.81	3.16	44	16.6	84.4	20.9	211	38.5	5489	2.22	88.5	128	NA	YAR5a.4.1	Australia	Eastern Australia	Sutherland et al 2016
63.9	1.3	NA	NA	6.81	NA	NA	NA	0.503	1520	NA	18.32	0.009	28.4	0.115	1.86	3.69	2.34	21	8	112.7	42.6	212	49.8	479	83.9	5980	6.14	295	324	NA	YAR5b.1.1	Australia	Eastern Australia	Sutherland et al 2016
64.13596435	1.903205313	NA	157.47787	NA	NA	NA	NA	NA	NA	NA	NA	NA	5.145129467	NA	2.959537938	7.659345599	1.765919454	NA	NA	161.5519822	NA	NA	NA	NA	121.6537594	NA	NA	144.5588464	569.1977264	NA	callen\020917\CR-147	North America	Western US	Zhu et al 2020
64.68095391	2.432380029	NA	361.3131064	NA	NA	NA	NA	NA	772.7103856	NA	NA	0.147232993	15.49826014	NA	NA	2.323680832	0.685823271	NA	NA	61.34856018	NA	NA	NA	NA	60.47964361	NA	NA	100.4260784	155.4107708	NA	callen\061107\riog-038	North America	Western US	Zhu et al 2020
64.99477208	1.598956481	NA	197.7888812	NA	NA	NA	NA	NA	349.914325	NA	NA	NA	5.216280244	NA	NA	1.865497075	0.282840492	NA	NA	32.09246721	NA	NA	NA	NA	24.96940786	NA	NA	225.7029472	244.4067843	NA	callen\060619\red-113	North America	Eastern US	Zhu et al 2020
65.5	1.4	NA	NA	5.13	NA	NA	NA	0.262	557	NA	44.91	0.005	5.43	0.038	0.6	1.24	0.89	6.76	2.62	38	15.1	81.6	21.2	224	42.6	5015	15.83	35.6	72.8	NA	YAR5d.1.2	Australia	Eastern Australia	Sutherland et al 2016
65.50035234	1.520862739	NA	386.5223896	NA	NA	NA	NA	NA	NA	NA	NA	NA	1.337526765	NA	1.349428505	4.537809627	0.630408141	NA	NA	51.50865703	NA	NA	NA	NA	18.55657317	NA	NA	42.47842352	371.4393274	NA	callen\020917\CR-083	North America	Western US	Zhu et al 2020
65.9	1	NA	NA	5.91	NA	NA	NA	0.342	954	NA	7.49	0.01	13.9	0.125	1.83	3.14	2.1	15.4	5.36	71.7	26.3	131.6	31.5	313	57.6	4755	3.46	306	263	NA	YAR5d.1.1	Australia	Eastern Australia	Sutherland et al 2016
66.38125501	2.088017102	NA	250.8652348	NA	NA	NA	NA	NA	1137.775923	NA	NA	NA	23.21462925	NA	1.395867536	3.60295677	0.688998265	NA	NA	97.93842115	NA	NA	NA	NA	75.11095322	NA	NA	272.3146941	625.3407528	NA	callen\050127\m0-114	North America	Eastern US	Zhu et al 2020
66.50099129	1.684872092	NA	40.4352322	NA	NA	NA	NA	NA	859.8988887	NA	NA	NA	20.49859066	NA	NA	2.738112364	1.209526229	NA	NA	52.36374762	NA	NA	NA	NA	79.67965245	NA	NA	276.4598353	325.6964477	NA	callen\060920\cdn-005	North America	Western US	Zhu et al 2020
66.9	2.4	NA	NA	2.15	NA	NA	NA	0.213	418	NA	2.16	NA	4.33	0.027	0.44	0.86	0.66	4.7	1.9	27.5	11.2	61	15.9	170	32.6	5118	1.12	24.6	52.6	NA	YAR5a.5.1	Australia	Eastern Australia	Sutherland et al 2016
67.43442604	1.572928092	NA	61.13004691	NA	NA	NA	NA	NA	267.6766336	NA	NA	NA	9.377457811	NA	NA	NA	0.328359593	NA	NA	18.38697762	NA	NA	NA	NA	31.13580396	NA	NA	77.00305081	381.9382327	NA	yoshi\081217\mss-100	North America	Eastern US	Zhu et al 2020
68.6	1.1	NA	NA	6.7	NA	NA	0.3	NA	750	NA	4.35	0.013	58.3	0.135	2.54	5.09	1.7	20	6.36	73.9	24.9	114	27.5	280	42	7640	0.63	511	713	NA	02SS12a_67	Asia	Iran	Barber et al 2019
68.94305873	1.91251567	NA	185.0820824	NA	NA	NA	NA	NA	732.2122279	NA	NA	NA	21.90854468	NA	NA	3.454618278	1.79248716	NA	NA	65.47967187	NA	NA	NA	NA	55.95776297	NA	NA	87.87222797	189.2240085	NA	callen\060619\red-169	North America	Eastern US	Zhu et al 2020
69.2687491	2.397279952	NA	300.2271475	NA	NA	NA	NA	NA	NA	NA	NA	NA	14.50987639	NA	1.700042339	4.19227292	0.397735348	NA	NA	67.36808572	NA	NA	NA	NA	28.99717169	NA	NA	147.5662236	181.3578468	NA	callen\020917\CR-135	North America	Western US	Zhu et al 2020
70.53269467	2.31884669	NA	301.3275994	NA	NA	NA	NA	NA	NA	NA	NA	NA	26.91547088	NA	7.281341934	13.72433186	3.402852875	NA	NA	218.1849291	NA	NA	NA	NA	85.6733528	NA	NA	266.1386605	255.7101194	NA	callen\020917\CR-017	North America	Western US	Zhu et al 2020
70.55016506	1.720280903	NA	216.2583372	NA	NA	NA	NA	NA	NA	NA	NA	NA	17.8391382	NA	0.98125869	1.827048992	0.523199463	NA	NA	44.26194188	NA	NA	NA	NA	45.97594613	NA	NA	174.7084463	323.4216844	NA	callen\020917\CR-068	North America	Western US	Zhu et al 2020
71.9	4.9	NA	NA	10.1	NA	NA	2.36	NA	4570	NA	38.9	0.134	36.7	0.45	7.76	16.2	2.26	90.9	32.5	438	161	725	176	1750	243	9180	11.7	759	777	NA	02SS12a_77	Asia	Iran	Barber et al 2019
72.56239594	1.708777188	NA	80.67264535	NA	NA	NA	NA	NA	507.3429631	NA	NA	NA	10.97401986	NA	NA	3.081605743	1.96510412	NA	NA	49.45010272	NA	NA	NA	NA	29.87593134	NA	NA	32.74158718	270.2070512	NA	callen\061107\riog-129	North America	Western US	Zhu et al 2020
72.97411039	1.769720295	NA	117.8283297	NA	NA	NA	NA	NA	647.2946009	NA	NA	NA	12.55361211	NA	NA	2.227099845	1.200771445	NA	NA	54.16607134	NA	NA	NA	NA	44.59191082	NA	NA	30.86159718	256.187294	NA	callen\060619\red-047	North America	Eastern US	Zhu et al 2020
73.00345415	1.852364619	NA	232.6633875	NA	NA	NA	NA	NA	1267.983923	NA	NA	0.13957816	21.40832874	NA	NA	5.738656047	2.482179232	NA	NA	104.3530154	NA	NA	NA	NA	86.93077163	NA	NA	481.1288464	444.7428848	NA	callen\060215\e2-007	Europe	Europe	Zhu et al 2020
73.15543166	1.838668509	NA	298.7611983	NA	NA	NA	NA	NA	786.4890846	NA	NA	0.114353092	9.982920598	NA	NA	5.091444814	0.979155059	NA	NA	74.77953355	NA	NA	NA	NA	45.39564042	NA	NA	211.5188626	506.9272595	NA	callen\050819\mkg-014	Asia	Southern Asia	Zhu et al 2020
74.4548629	1.35878689	NA	191.4936014	NA	NA	NA	NA	NA	610.6715406	NA	NA	0.179447561	9.266147559	NA	NA	1.562255204	0.503318452	NA	NA	45.99686971	NA	NA	NA	NA	49.05043196	NA	NA	121.7668186	688.2402256	NA	yoshi\081217\mss-084	North America	Eastern US	Zhu et al 2020
74.53024102	1.680473187	NA	532.623707	NA	NA	NA	NA	NA	NA	NA	NA	0.532515408	23.49601392	NA	2.777197044	7.567960779	1.34934511	NA	NA	422.2916167	NA	NA	NA	NA	238.482063	NA	NA	548.9660289	2783.814286	NA	callen\020917\CR-094	North America	Western US	Zhu et al 2020
74.6953933	2.00949185	NA	161.054676	NA	NA	NA	NA	NA	NA	NA	NA	NA	13.8519113	NA	0.52295668	1.261936626	0.321746003	NA	NA	28.64342259	NA	NA	NA	NA	29.86714663	NA	NA	65.62409512	154.7130775	NA	callen\020917\CR-105	North America	Western US	Zhu et al 2020
75.0363005	1.946586675	NA	148.0475065	NA	NA	NA	NA	NA	NA	NA	NA	NA	7.927326268	NA	0.438717757	0.949764044	0.288276318	NA	NA	24.39818845	NA	NA	NA	NA	26.55099841	NA	NA	73.81132518	176.0370517	NA	callen\020917\CR-066	North America	Western US	Zhu et al 2020
75.12464908	2.825395301	NA	231.2538545	NA	NA	NA	NA	NA	713.6688805	NA	NA	NA	17.25718578	NA	1.177625049	2.534437829	0.599250946	NA	NA	58.9053205	NA	NA	NA	NA	52.03040851	NA	NA	123.2976216	190.1703515	NA	callen\050127\m0-047	North America	Eastern US	Zhu et al 2020
76.16808112	2.007861266	NA	311.0660262	NA	NA	NA	NA	NA	1491.944493	NA	NA	NA	27.33235921	NA	NA	9.77387212	3.408205732	NA	NA	144.9140335	NA	NA	NA	NA	82.32943819	NA	NA	201.8604256	189.6527516	NA	callen\050707\npl-130	North America	Western US	Zhu et al 2020
76.23818145	2.024715365	NA	164.6301675	NA	NA	NA	NA	NA	1021.635986	NA	NA	NA	10.47862084	NA	NA	5.520152415	1.889829767	NA	NA	85.57257736	NA	NA	NA	NA	69.84614164	NA	NA	577.9130639	567.4464503	NA	yoshi\081217\mss-021	North America	Eastern US	Zhu et al 2020
76.50436231	1.958166171	NA	294.5446275	NA	NA	NA	NA	NA	1693.083634	NA	NA	NA	19.06645969	NA	3.531970772	8.173086914	1.740909958	NA	NA	157.5113976	NA	NA	NA	NA	83.23868037	NA	NA	238.7744384	413.1176379	NA	callen\050127\m0-051	North America	Eastern US	Zhu et al 2020
77.1	2.3	NA	NA	3.69	NA	NA	NA	0.641	1893	NA	17.89	0.019	18.9	0.256	3.62	6.58	4.09	32	11.6	149.2	53.8	258.8	60.2	586	103	4756	5.28	307	339	NA	YAR5a.1.1	Australia	Eastern Australia	Sutherland et al 2016
77.21809435	2.24833999	NA	186.2877613	NA	NA	NA	NA	NA	1372.566885	NA	NA	NA	23.40867449	NA	2.547220081	5.479709622	2.535871409	NA	NA	109.3386616	NA	NA	NA	NA	105.2770814	NA	NA	150.4681513	294.104065	NA	callen\050127\m0-190	North America	Eastern US	Zhu et al 2020
77.52046104	2.677069889	NA	102.4675718	NA	NA	NA	NA	NA	NA	NA	NA	NA	5.485439372	NA	0.40734066	0.811744679	0.32004	NA	NA	19.58191856	NA	NA	NA	NA	13.59160641	NA	NA	18.96229404	149.8484092	NA	callen\020917\CR-002	North America	Western US	Zhu et al 2020
77.53931013	1.807262725	NA	106.6345267	NA	NA	NA	NA	NA	NA	NA	NA	NA	5.954287674	NA	NA	0.263896161	21.64651568	NA	NA	48.31385518	NA	NA	NA	NA	33.52192974	NA	NA	99.91145098	162.7226176	NA	CALLEN\010827\IND-061	Asia	Southern Asia	Zhu et al 2020
78.52374407	2.261131734	NA	262.647068	NA	NA	NA	NA	NA	1162.819308	NA	NA	NA	38.28059191	NA	NA	4.571995457	1.632396342	NA	NA	97.5313129	NA	NA	NA	NA	65.95483109	NA	NA	316.5068904	235.0026476	NA	yoshi\081217\mss-056	North America	Eastern US	Zhu et al 2020
78.7810227	2.829661595	NA	197.0589303	NA	NA	NA	NA	NA	NA	NA	NA	NA	14.79757457	NA	0.886811198	2.133582591	0.547931014	NA	NA	42.03135045	NA	NA	NA	NA	26.25554683	NA	NA	38.87715645	52.44677193	NA	callen\020917\CR-037	North America	Western US	Zhu et al 2020
79.1	2.4	NA	189.7	7.656	NA	NA	NA	NA	679.569	NA	5.976	0.002	14.154	0.059	0.73	1.51	0.201	8.138	3.651	44.85	19.886	101.602	23.374	208.647	56.665	13240.914	1.633	181.645	423.812	NA	Danube.Spot 263	Europe	Europe	Balica et al 2020
79.4	1.4	NA	NA	4.7	NA	NA	NA	NA	588.2	NA	NA	0.516	12.6	0.414	1.72	2.07	0.52	12.5	4.5	63.7	29.7	145.7	38.9	328.2	85.9	2408.6	NA	252	381	Northern Diorite	TT102_11.1	South America	South America	Munoz et al 2012
79.74766294	1.788858753	NA	172.7283538	NA	NA	NA	NA	NA	952.0483773	NA	NA	NA	16.87606884	NA	NA	4.721104362	1.529724853	NA	NA	83.39156226	NA	NA	NA	NA	61.97746643	NA	NA	198.3201593	450.0191911	NA	callen\061107\riog-087	North America	Western US	Zhu et al 2020
80.43045965	2.219792174	NA	50.64157754	NA	NA	NA	NA	NA	NA	NA	NA	0.044558525	9.346938406	NA	0.93835272	2.331445768	1.351976862	NA	NA	73.69022785	NA	NA	NA	NA	65.60218203	NA	NA	102.9813981	534.7608107	NA	callen\020917\CR-093	North America	Western US	Zhu et al 2020
81.27761414	2.196442518	NA	199.8143041	NA	NA	NA	NA	NA	NA	NA	NA	NA	8.153183119	NA	NA	NA	0.309727776	NA	NA	40.47519914	NA	NA	NA	NA	35.30525619	NA	NA	70.52403808	129.5601157	NA	callen\010726\NEG-109	South America	South America	Zhu et al 2020
83.18330159	2.005540776	NA	660.4489802	NA	NA	NA	NA	NA	1842.124215	NA	NA	0.214389493	19.96525777	NA	NA	5.655410669	1.040636445	NA	NA	151.6604659	NA	NA	NA	NA	121.7706553	NA	NA	221.2483807	394.8143116	NA	callen\061107\riog-081	North America	Western US	Zhu et al 2020
83.4	3.1	NA	NA	15.8	NA	NA	1.12	NA	1870	NA	8.25	0.01	8.48	0.12	1.7	5.17	1.61	29.8	12.1	174	66.7	327	83.6	777	114.4	7300	2.5	290	222	NA	02SS12a_108	Asia	Iran	Barber et al 2019
85	NA	NA	NA	NA	NA	NA	NA	NA	408	NA	NA	0.02	18.79	NA	0.56	1.24	0.54	9.74	NA	35.9	NA	73.2	NA	161.3	NA	10640	NA	177	301	NA	327-14.1	North America	Western North America	Barth et al 2013
85	NA	NA	NA	NA	NA	NA	NA	NA	1027	NA	NA	0.02	20.95	NA	1.03	3.1	0.49	27.7	NA	102.4	NA	174.6	NA	310.2	NA	11513	NA	376	689	NA	MC3-19.1	North America	Western North America	Barth et al 2013
85.48153079	2.277907326	NA	84.60319191	NA	NA	NA	NA	NA	596.8936754	NA	NA	NA	25.26423943	NA	NA	1.651928879	0.801965464	NA	NA	47.09931582	NA	NA	NA	NA	50.70816389	NA	NA	282.5107277	492.5527092	NA	callen\061107\riog-191	North America	Western US	Zhu et al 2020
85.89550308	3.686373047	NA	417.3437607	NA	NA	NA	NA	NA	1577.688196	NA	NA	0.482801698	30.29080165	NA	NA	5.323733211	1.206775815	NA	NA	131.1462599	NA	NA	NA	NA	113.6228827	NA	NA	148.1101236	226.5007736	NA	callen\061129\p12-068	Europe	Europe	Zhu et al 2020
86	NA	NA	NA	NA	NA	NA	NA	NA	1653	NA	NA	0.04	43.84	NA	3.51	6.7	3.18	47.1	NA	170.7	NA	285.2	NA	514.7	NA	9536	NA	246	293	NA	MC3-.12.1	North America	Western North America	Barth et al 2013
86.25702636	1.961699487	NA	152.724585	NA	NA	NA	NA	NA	704.2619243	NA	NA	NA	12.49310091	NA	NA	1.376954615	0.463303435	NA	NA	49.96347261	NA	NA	NA	NA	65.3685478	NA	NA	219.964873	614.3428777	NA	callen\061107\riog-049	North America	Western US	Zhu et al 2020
86.51822384	106.8504993	NA	NA	NA	NA	NA	NA	NA	NA	NA	NA	1.71988	63.499912	2.1999	13.9998	12.799995	4.731	39.59	1.8522	135.11	47.699971	214.8	43.8999912	418	68.67	NA	NA	92.7	114	NA	199453 61d	Australia	Southern Australia	Barham et al 2019
86.72837953	2.011565169	NA	148.6896935	NA	NA	NA	NA	NA	NA	NA	NA	NA	22.5964509	NA	1.060576664	2.325270227	0.766935064	NA	NA	54.24970389	NA	NA	NA	NA	35.06549836	NA	NA	162.1036848	353.2548383	NA	callen\020917\CR-027	North America	Western US	Zhu et al 2020
87.98320489	3.698512343	NA	24.09322455	NA	NA	NA	NA	NA	NA	NA	NA	NA	0.445181861	NA	NA	0.447731516	0.163403657	NA	NA	16.85375423	NA	NA	NA	NA	30.01169936	NA	NA	5.768109904	285.0203732	NA	callen\020917\CR-058	North America	Western US	Zhu et al 2020
88	NA	NA	NA	NA	NA	NA	NA	NA	972	NA	NA	0.14	34.54	NA	1.95	3.93	1.43	26.11	NA	94.4	NA	161.8	NA	300.7	NA	10216	NA	182	254	NA	MC4-39.1	North America	Western North America	Barth et al 2013
88	NA	NA	NA	NA	NA	NA	NA	NA	460	NA	NA	0.02	21.12	NA	0.53	1.26	0.59	9.7	NA	39.9	NA	77.4	NA	182.2	NA	11772	NA	213	349	NA	327-40.1	North America	Western North America	Barth et al 2013
88.2	3.2	NA	167.6	NA	NA	NA	NA	NA	NA	NA	NA	0.0039	15.6	NA	1.22	NA	0.94	NA	NA	46.7	NA	NA	NA	NA	41.2	NA	NA	93.3	166	NA	bei chen\171130\Cooper-078	Australia	Eastern Australia	Zhu et al 2020
88.97870634	2.7	NA	215	NA	NA	NA	NA	NA	NA	NA	NA	0.308	20.14	NA	3.41	NA	1.56	NA	NA	75.7	NA	NA	NA	NA	63.1	NA	NA	206	248	NA	bei chen\171201\Flinders-024	Australia	Eastern Australia	Zhu et al 2020
89.6	2.8	NA	189.3	NA	NA	NA	NA	NA	NA	NA	NA	0.035	11.93	NA	0.6	NA	0.656	NA	NA	46.8	NA	NA	NA	NA	82.8	NA	NA	76	138	NA	bei chen\171201\Cooper-109	Australia	Eastern Australia	Zhu et al 2020
89.81475131	2.7	NA	229.3	NA	NA	NA	NA	NA	NA	NA	NA	0.285	16.79	NA	1.59	NA	1.86	NA	NA	108.7	NA	NA	NA	NA	138.3	NA	NA	116.9	550	NA	bei chen\171201\Flinders-063	Australia	Eastern Australia	Zhu et al 2020
89.84643434	2.043782206	NA	144.6124389	NA	NA	NA	NA	NA	1102.944978	NA	NA	NA	24.32049019	NA	NA	2.19968301	1.027102704	NA	NA	90.60064856	NA	NA	NA	NA	85.53689826	NA	NA	395.5240781	741.9612124	NA	callen\060619\red-183	North America	Eastern US	Zhu et al 2020
89.87702281	2.863622063	NA	205.3843158	NA	NA	NA	NA	NA	NA	NA	NA	NA	7.784878527	NA	3.725315461	5.711009932	1.039322757	NA	NA	77.3313747	NA	NA	NA	NA	32.85822811	NA	NA	63.67012705	109.8629844	NA	callen\020917\CR-159	North America	Western US	Zhu et al 2020
89.99637714	2.332506618	NA	85.38102333	NA	NA	NA	NA	NA	NA	NA	NA	NA	44.81194096	NA	1.683080416	3.017828658	1.255080143	NA	NA	48.01284866	NA	NA	NA	NA	46.82825883	NA	NA	974.2479791	1482.023925	NA	callen\020917\CR-151	North America	Western US	Zhu et al 2020
90	NA	NA	NA	NA	NA	NA	NA	NA	401	NA	NA	0.01	13.22	NA	0.39	1.09	0.36	10.13	NA	40.6	NA	68.4	NA	123.6	NA	10467	NA	86	183	NA	327-19.1	North America	Western North America	Barth et al 2013
90	NA	NA	NA	NA	NA	NA	NA	NA	1431	NA	NA	0.06	79.98	NA	3.83	6.75	2.76	51.08	NA	163.4	NA	247.2	NA	399.3	NA	10585	NA	145	179	NA	MC3-30.1	North America	Western North America	Barth et al 2013
90	NA	NA	NA	NA	NA	NA	NA	NA	1242	NA	NA	0.05	18.06	NA	4.03	6.76	1.08	41.11	NA	136.7	NA	207.3	NA	325.6	NA	9741	NA	193	232	NA	327-5.1	North America	Western North America	Barth et al 2013
90.1	2.52	NA	221	5.9	NA	13.3	NA	0.69	948	645900	1.96	0.0148	21.6	0.17	2.17	3.33	1.3	16.8	5.39	66.8	25.3	136.6	32.4	333	81.7	9055	0.71	299	541	Bishop Tuff rhyolite, base of plinian fall, 760 ka, N California, USA	BISHOP_33	NA	NA	Lu et al 2016
90.67778287	2.127442635	NA	164.6426164	NA	NA	NA	NA	NA	NA	NA	NA	0.663846773	21.60974022	NA	0.989090371	1.167734021	0.509542504	NA	NA	28.27254661	NA	NA	NA	NA	33.60812031	NA	NA	282.4762229	575.4885811	NA	callen\020917\CR-150	North America	Western US	Zhu et al 2020
90.88150022	2.147481611	NA	379.5753132	NA	NA	NA	NA	NA	NA	NA	NA	NA	24.19826925	NA	4.24517938	9.151106417	1.475266855	NA	NA	235.9922692	NA	NA	NA	NA	119.8698718	NA	NA	327.8022139	431.0095721	NA	callen\020917\CR-046	North America	Western US	Zhu et al 2020
91	NA	NA	NA	NA	NA	NA	NA	NA	944	NA	NA	0.03	11.03	NA	1.35	3.43	0.75	29.63	NA	104.1	NA	157.9	NA	253.4	NA	10788	NA	112	280	NA	327-29.1	North America	Western North America	Barth et al 2013
91	NA	NA	NA	NA	NA	NA	NA	NA	545	NA	NA	0.02	13.61	NA	0.45	1.17	0.37	9.91	NA	43.4	NA	94.1	NA	207.4	NA	10686	NA	139	418	NA	MC3-9.1	North America	Western North America	Barth et al 2013
91	NA	NA	NA	NA	NA	NA	NA	NA	849	NA	NA	0.04	18.61	NA	2.05	3.91	0.83	27.02	NA	89.7	NA	141.1	NA	240.8	NA	10610	NA	234	321	NA	MC3-17.1	North America	Western North America	Barth et al 2013
91	NA	NA	NA	NA	NA	NA	NA	NA	912	NA	NA	0.02	18.59	NA	1.57	2.96	1.02	23.02	NA	85.9	NA	157.5	NA	316.7	NA	10311	NA	251	516	NA	MC4-35.1	North America	Western North America	Barth et al 2013
91	NA	NA	NA	NA	NA	NA	NA	NA	2640	NA	NA	0.03	52.24	NA	2.53	6.38	2.56	56.69	NA	265.5	NA	473.6	NA	871.8	NA	11254	NA	311	387	NA	327-1.1	North America	Western North America	Barth et al 2013
91.19827832	2.086163411	NA	265.7394275	NA	NA	NA	NA	NA	869.9791478	NA	NA	NA	19.87624021	NA	NA	3.818243783	2.856242927	NA	NA	72.21030891	NA	NA	NA	NA	59.83960458	NA	NA	560.2316525	609.6709001	NA	callen\061107\riog-131	North America	Western US	Zhu et al 2020
91.32663735	2.155831402	NA	166.7446631	NA	NA	NA	NA	NA	1057.37006	NA	NA	NA	35.31581995	NA	3.896700526	8.157379239	2.855907094	NA	NA	108.5440526	NA	NA	NA	NA	57.80215907	NA	NA	372.9703292	673.3366144	NA	callen\050127\m0-072	North America	Eastern US	Zhu et al 2020
91.5	1.9	NA	NA	19.2	NA	NA	1.41	NA	3250	NA	7.1	0.088	13.8	0.513	9	16.5	4.64	80	24.8	329	119	545	126	1140	173	7610	1.67	404	203	NA	02SS10a_8	Asia	Iran	Barber et al 2019
91.58655663	2.340692965	NA	121.3703973	NA	NA	NA	NA	NA	523.1574489	NA	NA	NA	8.990814632	NA	1.116582598	2.314868602	0.644409533	NA	NA	44.01473143	NA	NA	NA	NA	35.36409257	NA	NA	137.1703824	291.1962965	NA	callen\050127\m0-041	North America	Eastern US	Zhu et al 2020
92	NA	NA	NA	NA	NA	NA	NA	NA	380	NA	NA	0.02	18.74	NA	0.52	1.06	0.42	8.49	NA	32.8	NA	68.3	NA	157.7	NA	12249	NA	141	274	NA	327-37.1	North America	Western North America	Barth et al 2013
92	NA	NA	NA	NA	NA	NA	NA	NA	1720	NA	NA	0.02	44.68	NA	0.4	1.88	0.36	25.24	NA	149.9	NA	306	NA	605.9	NA	13822	NA	246	708	NA	327-32.1	North America	Western North America	Barth et al 2013
92.1	2.2	NA	NA	29.7	NA	NA	2.51	NA	2420	NA	7.1	0.41	11.8	0.244	3.38	7.2	1.92	39.3	16.4	228	88	448	107	1080	139	5780	1.8	398	335	NA	02SS10a_119	Asia	Iran	Barber et al 2019
92.49435549	53.47083512	NA	NA	NA	NA	NA	NA	NA	NA	NA	NA	NA	4.43996	NA	0.81	2.865	0.2299815	6.845	3.299976	38.699892	14.6274	78.21	16.8156	165.999922	36.47	NA	NA	56.9	14	NA	199453 153d	Australia	Southern Australia	Barham et al 2019
92.7734429	2.209551747	NA	249.1169613	NA	NA	NA	NA	NA	1380.13134	NA	NA	0.10154367	16.51158348	NA	NA	6.260514953	1.471887724	NA	NA	128.6267626	NA	NA	NA	NA	86.89600719	NA	NA	383.3873548	679.6030659	NA	callen\070418\sjo-002	North America	Western US	Zhu et al 2020
92.9	1.9	NA	NA	5.6	NA	NA	2.29	NA	5690	NA	6.27	4.3	26.9	2.7	19.9	19.7	2.15	109	39	539	206	995	209	1769	314	9790	1.16	207	251	NA	02SS10a_18	Asia	Iran	Barber et al 2019
92.9	1.3	NA	NA	11.3	NA	NA	1.6	NA	1280	NA	19.9	0.077	25.3	0.408	6.71	9.1	3.09	44.4	13.5	163	49	209	46.1	444	61.6	5820	6.17	814	489	NA	02SS10a_35	Asia	Iran	Barber et al 2019
93	NA	NA	NA	NA	NA	NA	NA	NA	2371	NA	NA	0.05	104.99	NA	4.98	9.02	3.75	69.98	NA	247	NA	408.8	NA	691.4	NA	10403	NA	454	404	NA	327-41.1	North America	Western North America	Barth et al 2013
93	1.3	NA	NA	59	NA	NA	1.2	NA	1630	NA	41	0.51	38.4	1.9	26.4	32.6	18.3	106	28.8	262	73.3	258	48.6	365	45.9	5380	9.57	944	521	NA	02SS10a_10	Asia	Iran	Barber et al 2019
93.01539222	2.378982846	NA	57.33171857	NA	NA	NA	NA	NA	389.2505359	NA	NA	NA	24.82983936	NA	NA	1.238941187	0.491136053	NA	NA	29.13982745	NA	NA	NA	NA	35.21131198	NA	NA	757.7794699	1238.324112	NA	callen\070418\sjo-033	North America	Western US	Zhu et al 2020
93.2	1.7	NA	NA	4.8	NA	NA	0.03	NA	139	NA	4.93	-0.003	12	0.038	0.66	0.8	0.16	4.28	1.28	15	5.01	23.5	5.62	55.8	8.53	7050	2.24	32.1	43.4	NA	02SS10a_31	Asia	Iran	Barber et al 2019
93.25372483	1.984708136	NA	94.53240408	NA	NA	NA	NA	NA	NA	NA	NA	NA	32.42497988	NA	1.197505409	1.978508637	0.994176523	NA	NA	33.88389431	NA	NA	NA	NA	33.72646296	NA	NA	419.0149697	881.4016584	NA	callen\020917\CR-119	North America	Western US	Zhu et al 2020
93.67844724	2.2	NA	675	NA	NA	NA	NA	NA	NA	NA	NA	0.203	3.73	NA	2.84	NA	0.82	NA	NA	127.3	NA	NA	NA	NA	62.5	NA	NA	58.02	626	NA	bei chen\171201\Cooper-104	Australia	Eastern Australia	Zhu et al 2020
93.77276445	2.243615377	NA	238.1454414	NA	NA	NA	NA	NA	1249.154329	NA	NA	NA	19.20217852	NA	NA	7.111895164	1.529285037	NA	NA	121.4829465	NA	NA	NA	NA	63.31276403	NA	NA	180.5431227	269.9418494	NA	callen\060920\cdn-062	North America	Western US	Zhu et al 2020
94.11515139	2.626729417	NA	298.7641154	NA	NA	NA	NA	NA	1545.892428	NA	NA	0.631657479	32.12270364	NA	NA	6.118493433	1.164738809	NA	NA	116.1091669	NA	NA	NA	NA	111.3086488	NA	NA	1448.791735	2089.262015	NA	callen\070418\sjo-043	North America	Western US	Zhu et al 2020
94.14441552	2.199547004	NA	223.9875462	NA	NA	NA	NA	NA	1786.646034	NA	NA	0.072590235	23.56545813	NA	NA	6.809766695	3.614167712	NA	NA	144.684707	NA	NA	NA	NA	131.6950608	NA	NA	225.1457805	264.8917578	NA	callen\061107\riog-172	North America	Western US	Zhu et al 2020
94.5416436	2.309869857	NA	194.8616045	NA	NA	NA	NA	NA	NA	NA	NA	NA	12.81762612	NA	0.574367289	NA	0.651632358	NA	NA	42.88115351	NA	NA	NA	NA	74.66037499	NA	NA	93.55879791	252.2452831	NA	callen\010726\NEG-108	South America	South America	Zhu et al 2020
94.64607573	1.985589868	NA	86.94775967	NA	NA	NA	NA	NA	NA	NA	NA	NA	12.62481593	NA	0.383147939	1.391573182	0.650845842	NA	NA	35.59253034	NA	NA	NA	NA	30.91440235	NA	NA	277.6704166	1369.619765	NA	callen\020917\CR-045	North America	Western US	Zhu et al 2020
94.81439638	3.037055027	NA	593.3971391	NA	NA	NA	NA	NA	1660.173404	NA	NA	0.036867296	44.29225475	NA	NA	5.812085286	2.441103679	NA	NA	145.3690679	NA	NA	NA	NA	95.37827293	NA	NA	267.1433308	176.4049617	NA	callen\061107\riog-143	North America	Western US	Zhu et al 2020
95	NA	NA	NA	NA	NA	NA	NA	NA	659	NA	NA	0.06	19.95	NA	0.71	1.82	0.41	16.16	NA	64.1	NA	111.3	NA	200.7	NA	10196	NA	118	245	NA	MC4-14	North America	Western North America	Barth et al 2013
95	NA	NA	NA	NA	NA	NA	NA	NA	522	NA	NA	0.01	15.92	NA	0.6	1.45	0.44	13.24	NA	53.7	NA	92.4	NA	165.4	NA	11005	NA	124	259	NA	327-44.1	North America	Western North America	Barth et al 2013
95	NA	NA	NA	NA	NA	NA	NA	NA	854	NA	NA	0.02	32.56	NA	1.5	3.24	1.32	22.79	NA	84.3	NA	152.6	NA	324.9	NA	11579	NA	419	581	NA	327-22.1	North America	Western North America	Barth et al 2013
95.560751	2.577240767	NA	304.8206925	NA	NA	NA	NA	NA	1313.615806	NA	NA	0.149353811	29.55264243	NA	NA	4.417426409	0.678648849	NA	NA	119.5115643	NA	NA	NA	NA	83.38788942	NA	NA	647.9036171	1047.917597	NA	callen\070418\sjo-018	North America	Western US	Zhu et al 2020
95.69124414	2.7	NA	151.8	NA	NA	NA	NA	NA	NA	NA	NA	0.068	14.02	NA	0.94	NA	0.716	NA	NA	34.1	NA	NA	NA	NA	57	NA	NA	109.1	227.5	NA	bei chen\171201\Flinders-023	Australia	Eastern Australia	Zhu et al 2020
95.81427975	2.229475949	NA	220.6767299	NA	NA	NA	NA	NA	2409.902467	NA	NA	0.092862111	12.46379962	NA	6.746141035	12.73411866	1.808122695	NA	NA	237.5960523	NA	NA	NA	NA	113.6969278	NA	NA	301.7838005	500.3247326	NA	callen\050127\m0-102	North America	Eastern US	Zhu et al 2020
95.86522823	2.151873569	NA	53.78057264	NA	NA	NA	NA	NA	NA	NA	NA	NA	23.25550831	NA	1.064791107	1.535128989	0.67035073	NA	NA	30.49762727	NA	NA	NA	NA	38.21175745	NA	NA	402.3928005	887.9250623	NA	callen\020917\CR-152	North America	Western US	Zhu et al 2020
96	NA	NA	NA	NA	NA	NA	NA	NA	1214	NA	NA	0.02	46.48	NA	1.24	3.04	1.06	24.3	NA	108.5	NA	219.9	NA	491.3	NA	11307	NA	330	538	NA	MC4-23.1	North America	Western North America	Barth et al 2013
96.02179508	3.1	NA	189.1	NA	NA	NA	NA	NA	NA	NA	NA	0.014	14.47	NA	0.81	NA	0.65	NA	NA	32.9	NA	NA	NA	NA	40.2	NA	NA	122	129.1	NA	bei chen\171201\Flinders-052	Australia	Eastern Australia	Zhu et al 2020
96.149366	2.832705454	NA	125.8212385	NA	NA	NA	NA	NA	748.6618906	NA	NA	0.370205981	30.66830421	NA	NA	2.536190185	0.652797036	NA	NA	58.13613979	NA	NA	NA	NA	58.02037706	NA	NA	509.3654375	1028.803633	NA	callen\070418\sjo-077	North America	Western US	Zhu et al 2020
96.21661455	2.396795894	NA	84.38474477	NA	NA	NA	NA	NA	502.3252597	NA	NA	NA	26.6777986	NA	NA	3.049534814	1.141171778	NA	NA	51.23298147	NA	NA	NA	NA	49.82330166	NA	NA	319.2685358	479.9802728	NA	callen\050707\npl-136	North America	Western US	Zhu et al 2020
96.22598718	2.006869461	NA	438.8131811	NA	NA	NA	NA	NA	NA	NA	NA	NA	13.14340083	NA	1.288007162	3.812773992	0.184423602	NA	NA	111.6009556	NA	NA	NA	NA	95.18584208	NA	NA	443.657183	1883.953583	NA	callen\020917\CR-123	North America	Western US	Zhu et al 2020
96.25861299	3.388840093	NA	184.1104846	NA	NA	NA	NA	NA	NA	NA	NA	NA	5.055604931	NA	1.338068752	3.462946083	0.767395544	NA	NA	74.82801285	NA	NA	NA	NA	41.91245051	NA	NA	51.57947778	116.6947263	NA	callen\020917\CR-137	North America	Western US	Zhu et al 2020
96.30009811	2.549270101	NA	246.6649168	NA	NA	NA	NA	NA	1649.397059	NA	NA	NA	22.78305937	NA	NA	8.103741492	2.428464242	NA	NA	145.8895179	NA	NA	NA	NA	115.1132455	NA	NA	730.3446644	1239.315771	NA	callen\070418\sjo-016	North America	Western US	Zhu et al 2020
96.40475016	2.661412857	NA	27.02388807	NA	NA	NA	NA	NA	1449.842006	NA	NA	NA	24.19181678	NA	NA	2.433021437	0.539023077	NA	NA	111.0213891	NA	NA	NA	NA	69.74008326	NA	NA	565.3321804	247.9828485	NA	callen\051027\jo3-41	South America	South America	Zhu et al 2020
96.43264931	2.8	NA	196	NA	NA	NA	NA	NA	NA	NA	NA	0.065	17.2	NA	2.26	NA	1.213	NA	NA	70.3	NA	NA	NA	NA	58.7	NA	NA	160.5	219.2	NA	bei chen\171201\Flinders-020	Australia	Eastern Australia	Zhu et al 2020
96.6	1.5	NA	NA	5.2	NA	NA	0.62	NA	1603	NA	12.33	0.016	10.72	0.13	2.65	7.57	4.48	41.5	15.28	201.3	69.6	304	64.3	534	79.3	6370	3.38	391	312	NA	02SS12a_18	Asia	Iran	Barber et al 2019
96.7	1.7	NA	NA	1.5	NA	NA	1.26	NA	3700	NA	25.1	0.235	50.4	2	35	47.2	9.97	155	44.5	484	151.3	584	124.7	1078	130.4	5600	5.72	413	437	NA	02SS12a_50	Asia	Iran	Barber et al 2019
97	NA	NA	NA	NA	NA	NA	NA	NA	619	NA	NA	0.02	7.8	NA	0.61	1.74	0.38	15.76	NA	64.5	NA	109.8	NA	195.3	NA	9732	NA	82	297	NA	327-36.1	North America	Western North America	Barth et al 2013
97	NA	NA	NA	NA	NA	NA	NA	NA	861	NA	NA	0.02	36.9	NA	0.71	1.97	0.97	18.97	NA	88.6	NA	173	NA	349.4	NA	10362	NA	163	294	NA	MC3-15.1	North America	Western North America	Barth et al 2013
97	3	NA	NA	80	NA	NA	NA	NA	1367	NA	NA	0.0032	20.2	NA	0.05	9.1	1.37	28.2	9.5	106	45.7	205	54	460	96.3	8430	NA	231.8	246.5	VT15-17-b	VT15-17-b_17	North America	Western North America	Attia et al 2020
97	2	NA	NA	11	NA	NA	NA	NA	2200	NA	NA	0.37	55	0.7	11.8	55	3.3	67.5	16.8	269	78.6	356	71.2	680	108.6	8870	NA	374	450	VT15-17-b	VT15-17-b_63	North America	Western North America	Attia et al 2020
97	NA	NA	NA	NA	NA	NA	NA	NA	1691	NA	NA	0.06	83.77	NA	1.32	3.48	1.91	34.05	NA	143.5	NA	270.7	NA	553.9	NA	8861	NA	397	581	NA	327-7.1	North America	Western North America	Barth et al 2013
97	5.2	NA	NA	6.2	NA	NA	2.05	NA	5730	NA	20.8	0.198	95.5	2.45	38.5	62.5	27.7	227	77.4	812	240	929	196	1600	200	5390	5.12	1660	1100	NA	02SS12a_93	Asia	Iran	Barber et al 2019
97.07227007	2.389679605	NA	394.2911548	NA	NA	NA	NA	NA	1055.02484	NA	NA	NA	21.73277599	NA	NA	5.538317751	1.170904322	NA	NA	101.5552496	NA	NA	NA	NA	47.50280538	NA	NA	225.3467808	319.1925674	NA	callen\070418\sjo-073	North America	Western US	Zhu et al 2020
97.0980021	3.7	NA	298	NA	NA	NA	NA	NA	NA	NA	NA	0.094	10.44	NA	1.67	NA	1.21	NA	NA	65.3	NA	NA	NA	NA	65	NA	NA	91.5	122.8	NA	bei chen\171201\Flinders-007	Australia	Eastern Australia	Zhu et al 2020
97.16504519	2.41036225	NA	317.2537061	NA	NA	NA	NA	NA	1347.570934	NA	NA	0.032110224	46.33452815	NA	NA	3.906844794	0.79157708	NA	NA	120.0532336	NA	NA	NA	NA	77.5885761	NA	NA	100.3623233	223.3416796	NA	callen\061107\riog-166	North America	Western US	Zhu et al 2020
97.18591779	2.11720146	NA	47.92092225	NA	NA	NA	NA	NA	NA	NA	NA	NA	18.4703832	NA	0.581457682	0.863124488	0.42944203	NA	NA	22.0466032	NA	NA	NA	NA	36.3509252	NA	NA	306.3195992	876.7557865	NA	callen\020917\CR-014	North America	Western US	Zhu et al 2020
97.42982363	2.591694006	NA	119.3942711	NA	NA	NA	NA	NA	NA	NA	NA	0.088153355	9.299943126	NA	0.573649941	1.304259145	0.401434684	NA	NA	30.08704213	NA	NA	NA	NA	22.38573823	NA	NA	99.56927596	333.5000433	NA	callen\020917\CR-132	North America	Western US	Zhu et al 2020
97.55741279	3.110357134	NA	143.5972358	NA	NA	NA	NA	NA	NA	NA	NA	0.165760441	11.83387458	NA	1.480720755	2.325016185	0.456431413	NA	NA	44.0284828	NA	NA	NA	NA	31.34652665	NA	NA	124.4527493	356.2971854	NA	callen\020917\CR-021	North America	Western US	Zhu et al 2020
97.6	4.2	NA	203	NA	NA	NA	NA	NA	NA	NA	NA	0.0172	11.79	NA	2.07	NA	1.208	NA	NA	77.9	NA	NA	NA	NA	47.17	NA	NA	60.7	60.4	NA	bei chen\171201\Cooper-103	Australia	Eastern Australia	Zhu et al 2020
97.62186699	2.227802484	NA	559.8959275	NA	NA	NA	NA	NA	NA	NA	NA	NA	39.57401144	NA	10.82606136	20.92509193	8.560404803	NA	NA	285.7562547	NA	NA	NA	NA	66.26250959	NA	NA	360.6631993	511.2022867	NA	callen\020917\CR-158	North America	Western US	Zhu et al 2020
97.66985224	2.253751545	NA	117.2559035	NA	NA	NA	NA	NA	440.6295947	NA	NA	NA	9.318033427	NA	NA	1.182076811	0.311861989	NA	NA	31.91789835	NA	NA	NA	NA	41.90021459	NA	NA	174.0330313	524.9656384	NA	callen\070418\sjo-074	North America	Western US	Zhu et al 2020
97.82697951	3	NA	118.2	NA	NA	NA	NA	NA	NA	NA	NA	0.109	6.72	NA	0.64	NA	0.659	NA	NA	27.75	NA	NA	NA	NA	82	NA	NA	71.7	329	NA	bei chen\171201\Flinders-070	Australia	Eastern Australia	Zhu et al 2020
97.91888684	12.68728508	NA	NA	NA	NA	NA	NA	NA	NA	NA	NA	NA	14.359776	NA	0.99	1.452	0.9599835	7.99967	2.82156	38.411	17.5294	97.56	25.5999852	269.999994	64.4	NA	NA	55	116	NA	199453 158d	Australia	Southern Australia	Barham et al 2019
97.9716307	2.5	NA	203.5	NA	NA	NA	NA	NA	NA	NA	NA	0.114	46.4	NA	1.8	NA	1.9	NA	NA	90.7	NA	NA	NA	NA	78.6	NA	NA	231	293	NA	bei chen\171130\Cooper-051	Australia	Eastern Australia	Zhu et al 2020
97.99482917	2.335589738	NA	163.0676144	NA	NA	NA	NA	NA	634.1816921	NA	NA	0.071366881	14.57275466	NA	NA	1.080402547	0.552858779	NA	NA	39.797197	NA	NA	NA	NA	74.0628868	NA	NA	129.7301221	330.1195117	NA	callen\060920\cdn-017	North America	Western US	Zhu et al 2020
98	2	NA	NA	98	NA	NA	NA	NA	1333	NA	NA	0.00517	11.9	0.022	0.95	11.8	0.83	37	11.9	90	45.4	209	46.7	405	82.8	8890	NA	86.2	143	VT15-17-b	VT15-17-b_23	North America	Western North America	Attia et al 2020
98	3	NA	NA	NA	NA	NA	NA	NA	1430	NA	NA	0.00521	12.7	0.022	0.09	7.8	1.61	42	13.5	128	48	217	51.1	445	83.9	9330	NA	131.2	174.9	VT15-17-b	VT15-17-b_9	North America	Western North America	Attia et al 2020
98	2	NA	NA	27	NA	NA	NA	NA	1528	NA	NA	0.00556	22.5	0.024	1	18.1	1.7	26.7	9.5	145	55	274	56.6	565	98.9	8890	NA	152.2	250.2	VT15-17-b	VT15-17-b_65	North America	Western North America	Attia et al 2020
98	3	NA	NA	5.8	NA	NA	NA	NA	1580	NA	NA	NA	11.4	0.82	5.2	8.9	3.24	41.2	12.8	146	53	233	50.2	536	103	8280	NA	196	326	VT17-2	VT17-2-40	North America	Western North America	Attia et al 2020
98	NA	NA	NA	NA	NA	NA	NA	NA	1193	NA	NA	0.02	24.66	NA	0.5	2.28	0.35	24.8	NA	114.5	NA	209.8	NA	407.6	NA	13924	NA	393	978	NA	MC3.4.1	North America	Western North America	Barth et al 2013
98.2	4	NA	249.3	7.355	NA	NA	NA	NA	3498.762	NA	26.318	3.647	42.24	3.627	19.718	18.776	0.664	74.333	27.157	275.764	107.942	452.959	95.083	602.626	157.551	9403.832	5.541	1307.166	1827.202	NA	Yangtze_CJ07_Spot.160	Asia	China	Balica et al 2020
98.56299455	2.229618705	NA	220.7240994	NA	NA	NA	NA	NA	1482.632846	NA	NA	NA	20.2253048	NA	NA	9.791304926	2.442158113	NA	NA	145.5152055	NA	NA	NA	NA	97.90124257	NA	NA	379.1900914	582.6117204	NA	callen\050707\npl-045	North America	Western US	Zhu et al 2020
98.92481548	2.72381168	NA	61.25899373	NA	NA	NA	NA	NA	1863.709036	NA	NA	NA	53.97154478	NA	NA	4.281548426	0.305367605	NA	NA	146.3671173	NA	NA	NA	NA	124.1781654	NA	NA	1529.808261	709.6442206	NA	callen\080319\negt-001	South America	South America	Zhu et al 2020
99	2	NA	NA	7.6	NA	NA	NA	NA	699	NA	NA	NA	8.81	0.052	0.94	2.16	0.446	12.6	4.5	59	21.7	111	23.2	220	43.3	8300	NA	45.5	102.5	HLA-47-B	HLA-47-B_12	North America	Western North America	Attia et al 2020
99	3	NA	NA	22	NA	NA	NA	NA	1249	NA	NA	0.00527	10.7	0.011	0.03	9.9	1.8	23.9	8.3	86	44.1	214	46.1	433	108.8	8030	NA	89.9	180.9	VT15-17-b	VT15-17-b_35	North America	Western North America	Attia et al 2020
99	2	NA	NA	7.4	NA	NA	NA	NA	1050	NA	NA	NA	14.5	0.029	1.48	2.51	0.519	19.6	7.17	89	35.8	169	37.3	333	69.6	9000	NA	96.6	191	HLA-47-B	HLA-47-B_4	North America	Western North America	Attia et al 2020
99	3	NA	NA	6.2	NA	NA	NA	NA	1300	NA	NA	NA	10.33	0.044	1.26	3.25	0.83	20.3	7.92	107.7	42.6	210	45.7	464	87.5	7940	NA	110.6	234	NF16-1	NF16-1_31	North America	Western North America	Attia et al 2020
99	NA	NA	NA	NA	NA	NA	NA	NA	1089	NA	NA	0.06	48.5	NA	2.17	4.58	2.17	32.8	NA	113.5	NA	183.8	NA	319.4	NA	9027	NA	123	124	NA	327-30.1	North America	Western North America	Barth et al 2013
99	3	NA	NA	5.4	NA	NA	NA	NA	1810	NA	NA	NA	11.1	0.141	2.09	6.91	0.9	33.7	12.1	147	57.2	250	54	538	99.3	10220	NA	187	410	VT17-2	VT17-2-5	North America	Western North America	Attia et al 2020
99	3	NA	NA	270	NA	NA	NA	NA	1562	NA	NA	0.00498	19.9	0.056	0.33	7.4	1.09	35.5	10.6	108.6	54.3	234	51.6	490	90.2	7560	NA	277.2	287	VT15-17-b	VT15-17-b_13	North America	Western North America	Attia et al 2020
99	2	NA	NA	44	NA	NA	NA	NA	1251	NA	NA	7.00E-04	19.2	0.024	0.21	8.3	1.46	22.1	8.2	90	39.6	220	43	422	96	8360	NA	336.9	365.8	VT15-17-b	VT15-17-b_36	North America	Western North America	Attia et al 2020
99	3	NA	NA	NA	NA	NA	NA	NA	3280	NA	NA	0.21	60	0.42	4.1	29	2.27	124	37.8	300	120	470	110	900	154	8360	NA	394	324	VT15-17-b	VT15-17-b_10	North America	Western North America	Attia et al 2020
99	3	NA	NA	13.4	NA	NA	NA	NA	2940	NA	NA	NA	30.5	0.28	2.28	7.9	2.84	53.2	20.3	240	95.1	415	88.6	891	166	8090	NA	557	728	VT17-2	VT17-2-3	North America	Western North America	Attia et al 2020
99.19486941	2.206666902	NA	556.5028738	NA	NA	NA	NA	NA	3038.759022	NA	NA	0.239268276	73.51701442	NA	NA	24.14912751	7.378009347	NA	NA	281.5159019	NA	NA	NA	NA	174.1262091	NA	NA	1126.972039	999.8546699	NA	callen\050707\npl-066	North America	Western US	Zhu et al 2020
99.43138971	2.7	NA	142.2	NA	NA	NA	NA	NA	NA	NA	NA	0.016	17.4	NA	1.5	NA	1.293	NA	NA	53.8	NA	NA	NA	NA	56.75	NA	NA	95.5	194.2	NA	bei chen\171130\Cooper-052	Australia	Eastern Australia	Zhu et al 2020
99.60368206	2.511121671	NA	142.5839533	NA	NA	NA	NA	NA	777.8341257	NA	NA	NA	13.94054	NA	NA	2.380060233	NA	NA	NA	64.65542402	NA	NA	NA	NA	48.13030362	NA	NA	440.8986781	1196.165926	NA	callen\080319\negt-039	South America	South America	Zhu et al 2020
99.68165325	12.68668308	NA	NA	NA	NA	NA	NA	NA	NA	NA	NA	NA	7.288	NA	NA	NA	0.1695	5.399891	1.5299772	23.9128	1.4599676	67.59	17.1999936	21.65	55.95	NA	NA	3.1	85	NA	199453 44d	Australia	Southern Australia	Barham et al 2019
99.68251077	3	NA	114.8	NA	NA	NA	NA	NA	NA	NA	NA	0.0097	16.97	NA	1.19	NA	0.822	NA	NA	45.1	NA	NA	NA	NA	50.8	NA	NA	136.2	172	NA	bei chen\171201\Cooper-106	Australia	Eastern Australia	Zhu et al 2020
99.69	2.5	NA	281	5.7	NA	NA	NA	NA	NA	433600	89.5	0.058	121.7	NA	6.44	NA	2.39	NA	NA	508.3	NA	NA	NA	NA	225.9	10990	23.67	3900	2989	NA	Detrital825B_174	Australia	Eastern Australia	Shaanan et al 2018
100	2	NA	NA	9	NA	NA	NA	NA	678	NA	NA	NA	8.75	0.04	0.97	1.83	0.51	11.6	4.87	56.7	22.3	110	24.3	215	45.5	9030	NA	56.5	119	HLA-47-B	HLA-47-B_30	North America	Western North America	Attia et al 2020
100	2	NA	NA	7.3	NA	NA	NA	NA	770	NA	NA	0.00463	10.16	0.047	0.73	2.54	0.483	15.2	4.91	67.6	25.6	125	27.1	253	51.3	8340	NA	58.4	120.8	HLA-47-B	HLA-47-B_33	North America	Western North America	Attia et al 2020
100	2	NA	NA	6.4	NA	NA	NA	NA	802	NA	NA	0.00442	12.29	0.043	0.81	2.19	0.393	13.7	4.93	63.3	27.1	130	27.9	264	50.1	8530	NA	73.7	137.5	HLA-47-B	HLA-47-B_13	North America	Western North America	Attia et al 2020
100	2	NA	NA	10	NA	NA	NA	NA	716	NA	NA	NA	16	0.037	0.88	2.18	0.45	12.4	4.29	60.2	24	119	26.6	248	51.1	9810	NA	95.1	177.8	HLA-47-B	HLA-47-B_21	North America	Western North America	Attia et al 2020
100	2	NA	NA	19	NA	NA	NA	NA	1099	NA	NA	0.00541	15.1	0.012	0.13	3.4	0.39	17	5.9	96	37.2	151	37.6	363	68.1	9790	NA	97.4	264.3	VT15-17-b	VT15-17-b_48	North America	Western North America	Attia et al 2020
100	3	NA	NA	5.6	NA	NA	NA	NA	1482	NA	NA	NA	9.08	0.152	3.16	6.12	1.93	35.6	11.23	138	52.4	244	54.5	519	89.4	9300	NA	98.9	181.3	NF16-1	NF16-1_25	North America	Western North America	Attia et al 2020
100	3	NA	NA	6.9	NA	NA	NA	NA	1600	NA	NA	NA	8.62	0.136	2.63	4.78	1.38	27.4	9.93	132	52.1	258	56.6	578	106.9	8260	NA	107.3	253	NF16-1	NF16-1_40	North America	Western North America	Attia et al 2020
100	NA	NA	NA	NA	NA	NA	NA	NA	1113	NA	NA	0.02	25.88	NA	1.22	3.34	1.09	28.5	NA	110.2	NA	192	NA	335	NA	10658	NA	108	163	NA	MC4-44.1	North America	Western North America	Barth et al 2013
100	3	NA	NA	18	NA	NA	NA	NA	1161	NA	NA	0.011	12.2	0.05	0.9	9.3	2.7	24.8	7.1	88.3	41.7	148	43.2	414	66.9	8260	NA	115.6	186.2	VT15-17-b	VT15-17-b_56	North America	Western North America	Attia et al 2020
100	3	NA	NA	3.93	NA	NA	NA	NA	1587	NA	NA	NA	8.32	0.2	3.74	6.6	1.66	37.7	12.5	148	56	243	49.9	490	88.8	7600	NA	117.6	220.1	NF16-1	NF16-1_3	North America	Western North America	Attia et al 2020
100	3	NA	NA	3.7	NA	NA	NA	NA	1690	NA	NA	NA	13.2	0.38	1.95	4.46	0.93	27.4	11	128	50.2	261	51.7	547	111.2	10660	NA	137	405	VT17-2	VT17-2-37	North America	Western North America	Attia et al 2020
100	NA	NA	NA	NA	NA	NA	NA	NA	755	NA	NA	0.02	39.38	NA	2.76	4.86	2.69	30.44	NA	83.2	NA	125	NA	224.3	NA	9482	NA	140	193	NA	327-47.1	North America	Western North America	Barth et al 2013
100	3	NA	NA	2.3	NA	NA	NA	NA	1585	NA	NA	NA	14	0.78	4.73	9.2	3.04	37.1	12.4	139	50.9	218	49.6	513	98.1	8140	NA	201	299	VT17-2	VT17-2-10	North America	Western North America	Attia et al 2020
100	2	NA	NA	189	NA	NA	NA	NA	1299	NA	NA	0.006	19.1	0.09	0.21	12.6	0.94	20.8	9.5	94	44.9	190	48.8	453	86.5	8670	NA	260	317	VT15-17-b	VT15-17-b_22	North America	Western North America	Attia et al 2020
100	3	NA	NA	1.2	NA	NA	NA	NA	1980	NA	NA	NA	18.2	0.54	3.48	7.8	2.8	41.7	14.36	172	62.8	303	67.3	701	142.4	8880	NA	294	486	VT17-2	VT17-2-27	North America	Western North America	Attia et al 2020
100	3	NA	NA	5.2	NA	NA	NA	NA	1990	NA	NA	NA	17.1	0.17	2.3	4.7	1.4	30.7	12.1	158	68	304	76	810	146	8270	NA	409	726	VT17-2	VT17-2-13	North America	Western North America	Attia et al 2020
100	2	NA	NA	37	NA	NA	NA	NA	2760	NA	NA	0.032	35.7	0.116	3.6	46	6	56	20.5	307	93.1	372	88.2	872	137.8	8110	NA	416	452.4	VT15-17-b	VT15-17-b_60C	North America	Western North America	Attia et al 2020
100	2	NA	NA	134	NA	NA	NA	NA	4290	NA	NA	0.0052	41	0.21	3.6	57	8.1	141	47.6	348	160	653	147.5	1262	259	8220	NA	704.3	562.2	VT15-17-b	VT15-17-b_24	North America	Western North America	Attia et al 2020
100	3	NA	NA	10.2	NA	NA	NA	NA	2590	NA	NA	NA	35.5	0.77	5.37	13.2	3.63	60.8	19.4	240	88.4	389	79.2	844	147	8030	NA	995	1077	VT17-2	VT17-2-32	North America	Western North America	Attia et al 2020
100	3	NA	NA	9	NA	NA	NA	NA	2990	NA	NA	NA	71.6	0.478	7.3	11.63	0.216	64.6	21.9	261	100.6	434	85.4	771	127	11100	NA	1464	2810	VT16-9	VT16-9_37	North America	Western North America	Attia et al 2020
100.1527496	3.3	NA	256	NA	NA	NA	NA	NA	NA	NA	NA	0.126	5.83	NA	1.95	NA	0.636	NA	NA	111.8	NA	NA	NA	NA	65.31	NA	NA	68.5	124.4	NA	bei chen\171201\Flinders-025	Australia	Eastern Australia	Zhu et al 2020
100.4788825	2.398675986	NA	155.3446035	NA	NA	NA	NA	NA	943.5968645	NA	NA	0.038923662	13.47468813	NA	NA	4.400421813	1.949774246	NA	NA	80.06765258	NA	NA	NA	NA	77.43509737	NA	NA	108.5194912	194.8411967	NA	callen\061107\riog-051	North America	Western US	Zhu et al 2020
101	5.5	NA	188.3	NA	NA	NA	NA	NA	NA	NA	NA	0.0047	4.58	NA	0.367	NA	0.512	NA	NA	30.5	NA	NA	NA	NA	31.9	NA	NA	24.5	79.5	NA	bei chen\171130\Cooper-025	Australia	Eastern Australia	Zhu et al 2020
101	4	NA	NA	6.3	NA	NA	NA	NA	999	NA	NA	NA	5.23	0.46	3.38	5.55	2.18	20.9	7.51	78.5	33.4	155	34	351	66.7	7580	NA	38	66	VT17-2	VT17-2-4	North America	Western North America	Attia et al 2020
101	2	NA	NA	9.1	NA	NA	NA	NA	750	NA	NA	NA	8.38	0.035	1.01	2.14	0.593	13.9	5.23	61	25.2	121	26.1	247	52.1	7340	NA	52.1	112.6	HLA-47-B	HLA-47-B_10	North America	Western North America	Attia et al 2020
101	3	NA	NA	21	NA	NA	NA	NA	931	NA	NA	0.00577	12.2	0.024	0.2	6.7	0.96	20.7	5.7	100.6	32.6	171.3	33.5	325	60.6	8340	NA	62.4	119.8	VT15-17-b	VT15-17-b_67	North America	Western North America	Attia et al 2020
101	2	NA	NA	7.9	NA	NA	NA	NA	898	NA	NA	NA	9.75	0.049	0.75	2.22	0.564	16.3	5.9	75.3	29.6	146	33.3	318	63.6	8160	NA	62.6	153.8	HLA-47-B	HLA-47-B_34	North America	Western North America	Attia et al 2020
101	2	NA	NA	7.3	NA	NA	NA	NA	771	NA	NA	NA	11.34	0.048	0.84	2.03	0.383	12.7	4.91	60.4	24.4	114	24.8	222	45.6	8880	NA	64.3	136.8	HLA-47-B	HLA-47-B_19	North America	Western North America	Attia et al 2020
101	NA	NA	NA	NA	NA	NA	NA	NA	1214	NA	NA	0.02	4.64	NA	2.23	5.03	1.32	39.15	NA	141.7	NA	218.7	NA	347.1	NA	8997	NA	65	143	NA	MC4-34.1	North America	Western North America	Barth et al 2013
101	2	NA	NA	6	NA	NA	NA	NA	623	NA	NA	NA	7.68	0.049	0.76	1.4	0.404	12	4.58	57.4	20	103	21.7	205	39.9	8100	NA	68.6	158.5	NF16-1	NF16-1_2-R1	North America	Western North America	Attia et al 2020
101	3	NA	NA	3.54	NA	NA	NA	NA	787	NA	NA	NA	8.21	0.035	0.88	1.7	0.393	12.6	4.61	61.1	24.1	130.7	30	305	58.8	9880	NA	94.6	300	DL16-58	DL16-58_38	North America	Western North America	Attia et al 2020
101	3	NA	NA	6.2	NA	NA	NA	NA	1166	NA	NA	0.00482	9.87	0.067	1.85	3.79	0.659	22.6	8.1	101.3	40.1	196	40.1	385	71.6	9220	NA	102.3	236.8	NF16-1	NF16-1_13	North America	Western North America	Attia et al 2020
101	3	NA	NA	3.2	NA	NA	NA	NA	1718	NA	NA	NA	9.54	0.172	2.14	4.65	0.86	35	11.8	149	58.1	274	57.4	541	91.3	8990	NA	116.6	441	VT16-9	VT16-9_38	North America	Western North America	Attia et al 2020
101	3	NA	NA	16	NA	NA	NA	NA	1630	NA	NA	4.00E-04	19.3	0.057	0.7	15	1.4	38.2	12.5	135	54.7	241	57	557	103	9900	NA	139	243	VT15-17-b	VT15-17-b_43	North America	Western North America	Attia et al 2020
101	3	NA	NA	NA	NA	NA	NA	NA	1800	NA	NA	NA	8.6	0.25	1.7	5.26	0.46	29.3	11.5	152	59.8	287	64.7	673	126.9	10270	NA	158	444	VT17-2	VT17-2-12	North America	Western North America	Attia et al 2020
101	3	NA	NA	21	NA	NA	NA	NA	1621	NA	NA	0.00544	13.4	0.046	3.2	30.7	5.4	43.8	12.2	176	60.5	237	55.8	562	86.5	8470	NA	163.5	225.4	VT15-17-b	VT15-17-b_59	North America	Western North America	Attia et al 2020
101	3	NA	NA	5.8	NA	NA	NA	NA	1039	NA	NA	NA	8.68	0.31	1.07	2.37	1.32	18.1	6.53	79.4	31.3	162	38.7	426	91.5	7140	NA	175	279	VT17-2	VT17-2-11	North America	Western North America	Attia et al 2020
101	NA	NA	NA	NA	NA	NA	NA	NA	640	NA	NA	0.01	27.59	NA	0.58	1.83	0.88	15.17	NA	62.8	NA	114.2	NA	239.4	NA	12371	NA	249	393	NA	327-8.1	North America	Western North America	Barth et al 2013
101	3	NA	NA	12	NA	NA	NA	NA	1698	NA	NA	0.55	60	0.85	9.3	34	1.51	44	13.4	143	61.8	278	56.1	537	101.7	9420	NA	268	390.9	VT15-17-b	VT15-17-b_40	North America	Western North America	Attia et al 2020
101	2	NA	NA	34	NA	NA	NA	NA	2060	NA	NA	0.81	63	1.37	14.4	44	3.1	49	16.2	175	71.9	283	69.6	591	105	8650	NA	288	375	VT15-17-b	VT15-17-b_51	North America	Western North America	Attia et al 2020
101	2	NA	NA	5	NA	NA	NA	NA	2580	NA	NA	0.00499	21.1	0.056	2.5	31	5.5	94	22.3	183	91.4	385	77.7	693	156.2	7930	NA	327.2	294.8	VT15-17-b	VT15-17-b_28	North America	Western North America	Attia et al 2020
101	2	NA	NA	23	NA	NA	NA	NA	3010	NA	NA	0.00535	29.9	0.178	3.1	46	7.7	93	25.8	280	112	370	99	960	168	8590	NA	501	450	VT15-17-b	VT15-17-b_49	North America	Western North America	Attia et al 2020
101.0470365	3.004810082	NA	250.4630325	NA	NA	NA	NA	NA	972.8737908	NA	NA	NA	9.045287697	NA	NA	1.850205607	0.221361089	NA	NA	76.27159717	NA	NA	NA	NA	64.28770207	NA	NA	172.406828	581.4736069	NA	callen\070418\sjo-070	North America	Western US	Zhu et al 2020
101.0844585	2.667578677	NA	375.1265816	NA	NA	NA	NA	NA	1800.392766	NA	NA	NA	47.37488891	NA	NA	4.785352092	0.501372317	NA	NA	147.4091512	NA	NA	NA	NA	111.1773134	NA	NA	635.540785	1067.181517	NA	callen\070418\sjo-089	North America	Western US	Zhu et al 2020
101.3	1.8	NA	NA	38	NA	NA	1.03	NA	2020	NA	14.4	0.176	14.7	0.86	13	20.3	7.8	73	20.4	225	70.3	301	65.2	631	90	6650	4.32	451	337	NA	02SS10a_85	Asia	Iran	Barber et al 2019
101.4521851	3.5	NA	173.4	NA	NA	NA	NA	NA	NA	NA	NA	0.0189	10.17	NA	1.84	NA	1.054	NA	NA	43.1	NA	NA	NA	NA	37.2	NA	NA	82.8	110.1	NA	bei chen\171201\Flinders-042	Australia	Eastern Australia	Zhu et al 2020
101.5263833	1.579520907	NA	170.4982442	NA	NA	NA	NA	NA	569.4432223	NA	NA	0.30781981	16.41465973	NA	NA	2.045919007	0.516927135	NA	NA	43.22346431	NA	NA	NA	NA	49.51513872	NA	NA	328.6481142	769.1258249	NA	yoshi\081217\mss-036	North America	Eastern US	Zhu et al 2020
101.7	1.9	NA	NA	8.2	NA	NA	0.43	NA	890	NA	120	0.67	15.9	1.15	10.7	8.7	5	31.4	10.3	121	38	150	30.7	233	32.9	6750	7.7	243	208	NA	02SS12a_53	Asia	Iran	Barber et al 2019
101.7327464	2.309669823	NA	485.5510575	NA	NA	NA	NA	NA	1164.944785	NA	NA	NA	11.27165796	NA	NA	3.071133056	0.312083627	NA	NA	91.22972808	NA	NA	NA	NA	82.37102151	NA	NA	293.9662864	729.5794476	NA	callen\070418\sjo-059	North America	Western US	Zhu et al 2020
101.78643	2.456922268	NA	236.6311197	NA	NA	NA	NA	NA	797.4798888	NA	NA	NA	8.915219362	NA	NA	2.404288815	0.375633574	NA	NA	65.81710375	NA	NA	NA	NA	47.58504918	NA	NA	186.0386553	362.0217329	NA	callen\050819\mkg-027	Asia	Southern Asia	Zhu et al 2020
101.8	4.4	NA	NA	99	NA	NA	0.64	NA	1209	NA	5.1	0.148	12.79	0.844	10.24	15.1	2.25	50.3	14.36	160	47.8	198	41.8	377	48.6	5790	1.64	72.8	94.7	NA	02SS10a_60	Asia	Iran	Barber et al 2019
101.9	7.1	NA	NA	228	NA	NA	1.43	NA	1440	NA	11.1	26	85	8.9	54	18	4.26	59.2	17.8	209	63.8	252	49.9	407	48.2	5710	3.53	65.5	97.1	NA	02SS10a_33	Asia	Iran	Barber et al 2019
101.917239	3.877489005	NA	40.4874164	NA	NA	NA	NA	NA	450.5841647	NA	NA	0.089074681	8.801203105	NA	NA	1.541653815	0.232472806	NA	NA	39.61752702	NA	NA	NA	NA	25.26531913	NA	NA	76.85746318	235.1210381	NA	callen\080416\negt-160	South America	South America	Zhu et al 2020
102	5	NA	NA	7.3	NA	NA	NA	NA	579	NA	NA	NA	3.96	0.27	1.85	2.82	1.01	11.9	4.07	51.3	20.7	99.8	20.2	216	46.9	7650	NA	36	62	VT17-2	VT17-2-1	North America	Western North America	Attia et al 2020
102	3	NA	NA	39	NA	NA	NA	NA	561	NA	NA	0.0051	6.7	0.022	0.05	0.6	0.18	11.2	5.5	39.2	20.5	81	21.8	188	38.7	9810	NA	39.9	101.9	VT15-17-b	VT15-17-b_26	North America	Western North America	Attia et al 2020
102	2	NA	NA	8.5	NA	NA	NA	NA	863	NA	NA	NA	8.26	0.053	1.08	2.17	0.698	13.8	5.62	68.5	28.1	141	32.2	288	64	8990	NA	45.4	113.2	HLA-47-B	HLA-47-B_5	North America	Western North America	Attia et al 2020
102	3	NA	NA	42	NA	NA	NA	NA	587	NA	NA	0.00513	9.1	0.01	0.614	1.456	0.16	9.1	4.8	36.9	20.7	92	20.5	213	42.5	9340	NA	58.3	113.5	VT15-17-b	VT15-17-b_20	North America	Western North America	Attia et al 2020
102	2	NA	NA	9.5	NA	NA	NA	NA	821	NA	NA	NA	10.6	0.026	1	2.09	0.47	14.6	5.18	67.1	27.2	129	28.6	265	53.9	8290	NA	64.9	134.1	HLA-47-B	HLA-47-B_24	North America	Western North America	Attia et al 2020
102	2	NA	NA	9.4	NA	NA	NA	NA	863	NA	NA	NA	9.79	0.073	1.23	2.81	0.875	18.5	6.24	74.1	27.1	138.5	30.5	256	54.6	8280	NA	71.1	134.2	HLA-47-B	HLA-47-B_17	North America	Western North America	Attia et al 2020
102	3	NA	NA	3.9	NA	NA	NA	NA	812	NA	NA	NA	6.49	0.23	1.18	2.28	0.73	13.2	5.19	64.3	24.5	129.1	29	302	55.8	8520	NA	92	240	VT17-2	VT17-2-30	North America	Western North America	Attia et al 2020
102	2	NA	NA	6.5	NA	NA	NA	NA	847	NA	NA	NA	10.86	0.066	1.12	2.82	0.69	18.3	5.91	76	28.9	143	31.1	276	55.8	8200	NA	93.2	160.7	HLA-47-B	HLA-47-B_23	North America	Western North America	Attia et al 2020
102	2	NA	NA	6.3	NA	NA	NA	NA	827	NA	NA	NA	9.09	0.035	1.29	2.45	0.63	17	5.95	75.3	30	131.9	30.4	268	52.5	8850	NA	93.2	198.6	HLA-47-B	HLA-47-B_39	North America	Western North America	Attia et al 2020
102	3	NA	NA	4.3	NA	NA	NA	NA	714	NA	NA	0.00416	6.86	0.047	0.76	1.66	0.311	11.9	5.06	56.6	24.1	112.5	23.4	216	42.4	9950	NA	105.4	289	DL16-58	DL16-58_9	North America	Western North America	Attia et al 2020
102	3	NA	NA	20	NA	NA	NA	NA	1480	NA	NA	0.00509	14.4	0.042	0.41	14	0.73	38.5	9.7	109	48.5	242	53.8	480	88.3	8680	NA	107.6	180.3	VT15-17-b	VT15-17-b_39	North America	Western North America	Attia et al 2020
102	2	NA	NA	6.2	NA	NA	NA	NA	1631	NA	NA	NA	9.59	0.171	3.51	7.53	1.47	38.6	12.9	153	54.6	249	52	480	85.9	8740	NA	110.7	192	NF16-1	NF16-1_18	North America	Western North America	Attia et al 2020
102	4	NA	NA	3.2	NA	NA	NA	NA	773	NA	NA	0.00436	8.43	0.028	0.71	1.56	0.317	10.4	4.41	56.2	24	126.5	28.5	298	59.5	10150	NA	113.9	348	DL16-58	DL16-58_36	North America	Western North America	Attia et al 2020
102	3	NA	NA	5.8	NA	NA	NA	NA	1700	NA	NA	NA	10.5	0.176	3.43	6.4	1.69	36.1	12.6	148	59.3	273	56.1	518	105	8080	NA	125.2	230	NF16-1	NF16-1_1-C1	North America	Western North America	Attia et al 2020
102	3	NA	NA	3	NA	NA	NA	NA	1266	NA	NA	0.0032	11.3	0.04	0.41	1.7	0.87	33.3	10.2	111	40.8	200	47.8	397	75.6	8310	NA	128.2	193.1	VT15-17-b	VT15-17-b_1	North America	Western North America	Attia et al 2020
102	3	NA	NA	3.5	NA	NA	NA	NA	1740	NA	NA	NA	14.4	0.211	1.58	4.3	1.8	27.8	9.92	140.2	57.1	291	66	706	143.9	8150	NA	145	331	VT17-2	VT17-2-20	North America	Western North America	Attia et al 2020
102	3	NA	NA	1.85	NA	NA	NA	NA	834	NA	NA	NA	10	0.025	0.68	1.32	0.171	12.1	4.22	57.2	26.5	139	32.7	365	70.7	12300	NA	179.4	616	DL16-58	DL16-58_1	North America	Western North America	Attia et al 2020
102	2	NA	NA	19	NA	NA	NA	NA	1463	NA	NA	7.00E-04	14.8	0.044	0.89	20.1	2.22	48.2	13.7	110	52.9	235	54.1	492	107	8740	NA	191	217.5	VT15-17-b	VT15-17-b_27	North America	Western North America	Attia et al 2020
102	2	NA	NA	0.29	NA	NA	NA	NA	866	NA	NA	NA	9.47	0.032	0.67	1.56	0.179	14.3	4.96	66	29.8	134	30	338	61.6	11100	NA	193.1	646	DL16-58	DL16-58_33	North America	Western North America	Attia et al 2020
102	3	NA	NA	7.3	NA	NA	NA	NA	1258	NA	NA	NA	9.3	0.058	1.44	3.61	0.74	24.3	8.67	105.8	41.9	183	35.3	330	59.9	8020	NA	196.1	473	VT16-9	VT16-9_20	North America	Western North America	Attia et al 2020
102	NA	NA	NA	NA	NA	NA	NA	NA	1419	NA	NA	0.07	52.59	NA	4.38	7.26	3.49	45.29	NA	152.2	NA	250.4	NA	440.9	NA	8268	NA	205	170	NA	MC4-37.1	North America	Western North America	Barth et al 2013
102	3	NA	NA	32	NA	NA	NA	NA	1086	NA	NA	0.00503	14.8	0.01	0.37	4.4	1.33	23.8	6.1	64.6	36.7	157	37.8	334	74.9	8660	NA	210.1	240.3	VT15-17-b	VT15-17-b_30	North America	Western North America	Attia et al 2020
102	4	NA	NA	8.2	NA	NA	NA	NA	1381	NA	NA	NA	12.1	0.77	4.72	8.1	3.06	34.2	11.03	121.5	44.5	205	42.4	455	84.9	7710	NA	219	250	VT17-2	VT17-2-29	North America	Western North America	Attia et al 2020
102	3	NA	NA	1.6	NA	NA	NA	NA	1012	NA	NA	NA	13.69	0.05	1.03	2.25	0.316	14.9	6.02	78	33.6	150	33.2	349	68.2	10870	NA	221.6	539	DL16-58	DL16-58_32	North America	Western North America	Attia et al 2020
102	3	NA	NA	0.81	NA	NA	NA	NA	779	NA	NA	0.00459	10.75	0.037	0.57	1.43	0.199	10.33	4.17	54.2	24.4	120	29.3	345	62.5	11600	NA	224	696	DL16-58	DL16-58_15-R3	North America	Western North America	Attia et al 2020
102	3	NA	NA	3.4	NA	NA	NA	NA	1110	NA	NA	NA	12.5	NA	1.14	3.02	0.44	16.1	6.26	88	35	176	41.4	435	76.3	11000	NA	226	595	VT17-2	VT17-2-38	North America	Western North America	Attia et al 2020
102	3	NA	NA	15.8	NA	NA	NA	NA	1713	NA	NA	NA	13.4	0.165	2.39	5.06	1.89	31.2	10.8	133	56.7	271	55.4	522	101	6530	NA	228	313	NF16-1	NF16-1_42	North America	Western North America	Attia et al 2020
102	4	NA	NA	28	NA	NA	NA	NA	1700	NA	NA	1.00E-04	14.2	NA	0.18	16	2.13	40	13	132.1	71	282	58.7	504	119.8	8600	NA	234	273.2	VT15-17-b	VT15-17-b_29-55a	North America	Western North America	Attia et al 2020
102	2	NA	NA	NA	NA	NA	NA	NA	1611	NA	NA	0.0028	23.2	0.091	0.49	5.1	0.62	38.6	12.9	124	54.9	268	62.7	500	98.4	8750	NA	245.7	305.3	VT15-17-b	VT15-17-b_4	North America	Western North America	Attia et al 2020
102	2	NA	NA	4	NA	NA	NA	NA	1093	NA	NA	0.00424	24.8	0.062	0.82	2.26	0.46	15	5.99	84.6	34.4	183	42.2	392	83.7	11700	NA	282.4	518	HLA-47-B	HLA-47-B_32	North America	Western North America	Attia et al 2020
102	2	NA	NA	39	NA	NA	NA	NA	2390	NA	NA	0.00558	23.4	0.117	5	37	4.2	54	18.7	260	85.1	375	82.6	861	142.8	8420	NA	283	367.6	VT15-17-b	VT15-17-b_68	North America	Western North America	Attia et al 2020
102	2	NA	NA	5.4	NA	NA	NA	NA	2590	NA	NA	NA	12.91	0.103	2.29	4.78	1.4	40.5	16	206	84.9	395	84.8	784	150	7920	NA	295.5	694	VT16-8	VT16-8_29	North America	Western North America	Attia et al 2020
102	2	NA	NA	5.79	NA	NA	NA	NA	1774	NA	NA	NA	20.17	0.099	1.7	4.17	0.65	31.1	11.06	139	59.9	306	64.3	577	117	9230	NA	390	747	HLA-47-B	HLA-47-B_38	North America	Western North America	Attia et al 2020
102	NA	NA	NA	NA	NA	NA	NA	NA	1034	NA	NA	0.02	78.2	NA	0.77	2.05	0.56	18.63	NA	94.9	NA	194.1	NA	395.5	NA	12379	NA	395	549	NA	MC3-31.1	North America	Western North America	Barth et al 2013
102	2	NA	NA	56	NA	NA	NA	NA	1511	NA	NA	0.234	35.7	0.48	3.6	18.6	1.71	33	11.2	101	52	245	54.5	491	102.5	8120	NA	405.8	381.8	VT15-17-b	VT15-17-b_31	North America	Western North America	Attia et al 2020
102	NA	NA	NA	NA	NA	NA	NA	NA	913	NA	NA	0.02	37.46	NA	1.48	3.39	1.37	23.36	NA	87.6	NA	159.8	NA	337.5	NA	12155	NA	432	583	NA	MC3-1.1	North America	Western North America	Barth et al 2013
102	3	NA	NA	4.87	NA	NA	NA	NA	1491	NA	NA	NA	11.85	0.092	1.9	4.29	0.83	33.1	12	137	55.3	240	44.1	413	76.1	8460	NA	518	951	VT16-9	VT16-9_18	North America	Western North America	Attia et al 2020
102	2	NA	NA	4.5	NA	NA	NA	NA	3700	NA	NA	NA	14.2	0.479	8.3	18.4	3.05	95	32.9	355	127	552	109	1020	164	8430	NA	521	1068	VT16-9	VT16-9_35	North America	Western North America	Attia et al 2020
102	2	NA	NA	2.7	NA	NA	NA	NA	1875	NA	NA	NA	23.7	0.093	1.67	4.72	0.386	38.9	14.2	171	68.4	305	60.7	530	99.9	11020	NA	638	1302	HLA-47-B	HLA-47-B_29-R1	North America	Western North America	Attia et al 2020
102	3	NA	NA	5.48	NA	NA	NA	NA	1775	NA	NA	NA	14.72	0.091	2.03	4.87	1.157	40.4	14.1	165	64.7	268	53.2	490	89.4	8400	NA	689	1158	VT16-9	VT16-9_31	North America	Western North America	Attia et al 2020
102	4	NA	2007.8	43.28	NA	2483.04	38.11	21.69	5091.43	NA	186.2	2.319	25.55	2.524	19.1	12.93	2.227	44.25	18.15	290.05	133.84	823.51	235.7	2719.7	548.08	18078.88	106	2397	21865	K1-1100	A79	Europe	Europe	Kozlik et al 2016
102.0691629	3.227392343	NA	471.2804267	NA	NA	NA	NA	NA	962.8006308	NA	NA	NA	11.31285372	NA	NA	2.618135328	1.357604318	NA	NA	83.50553144	NA	NA	NA	NA	60.08367313	NA	NA	66.73892212	126.1493313	NA	callen\070418\sjo-085	North America	Western US	Zhu et al 2020
102.2	3.4	NA	211.4	NA	NA	NA	NA	NA	NA	NA	NA	0.078	19.75	NA	1.29	NA	0.943	NA	NA	49.3	NA	NA	NA	NA	63.6	NA	NA	105.4	227.2	NA	bei chen\171201\Flinders-044	Australia	Eastern Australia	Zhu et al 2020
102.2	2.9	NA	142.7	NA	NA	NA	NA	NA	NA	NA	NA	0.137	17.21	NA	1.27	NA	1.306	NA	NA	49.1	NA	NA	NA	NA	41.15	NA	NA	108	221.3	NA	bei chen\171130\Cooper-019	Australia	Eastern Australia	Zhu et al 2020
102.2007928	2.648042479	NA	197.6244457	NA	NA	NA	NA	NA	909.9075785	NA	NA	NA	7.321292112	NA	NA	2.837703842	0.783954087	NA	NA	79.02556193	NA	NA	NA	NA	69.05694585	NA	NA	171.4753991	362.541596	NA	callen\070418\sjo-007	North America	Western US	Zhu et al 2020
102.3418076	4.4	NA	362	NA	NA	NA	NA	NA	NA	NA	NA	0.47	12.4	NA	4.2	NA	1.45	NA	NA	54.7	NA	NA	NA	NA	85.7	NA	NA	62.9	118.3	NA	bei chen\171130\Cooper-026	Australia	Eastern Australia	Zhu et al 2020
102.5514056	2.6319649	NA	170.3425592	NA	NA	NA	NA	NA	550.8523497	NA	NA	NA	2.612441579	NA	NA	1.353858552	NA	NA	NA	44.42742951	NA	NA	NA	NA	36.55243465	NA	NA	66.54383092	229.3651141	NA	callen\050819\mkg-046	Asia	Southern Asia	Zhu et al 2020
102.7	3.7	NA	135.4	NA	NA	NA	NA	NA	NA	NA	NA	0.317	9.54	NA	1.09	NA	0.561	NA	NA	29.2	NA	NA	NA	NA	33.8	NA	NA	59.8	86.2	NA	bei chen\171130\Cooper-084	Australia	Eastern Australia	Zhu et al 2020
102.741756	2.990994787	NA	231.1760673	NA	NA	NA	NA	NA	NA	NA	NA	0.263623249	7.873125059	NA	1.066773285	1.693756219	0.465533836	NA	NA	54.73689875	NA	NA	NA	NA	65.63146506	NA	NA	95.17774549	298.8503068	NA	callen\020917\CR-011	North America	Western US	Zhu et al 2020
102.7461411	2.511801435	NA	384.214579	NA	NA	NA	NA	NA	2104.27148	NA	NA	NA	17.47109596	NA	NA	11.31391219	4.526621849	NA	NA	206.7880412	NA	NA	NA	NA	101.6355377	NA	NA	202.0967729	334.0014044	NA	callen\070418\sjo-052	North America	Western US	Zhu et al 2020
102.9567013	2.519350427	NA	340.7327037	NA	NA	NA	NA	NA	NA	NA	NA	0.848042629	15.93641125	NA	1.529927245	0.285190563	37.43932264	NA	NA	63.69591684	NA	NA	NA	NA	25.49587511	NA	NA	173.3647126	223.4778865	NA	CALLEN\010827\IND-034	Asia	Southern Asia	Zhu et al 2020
103	NA	NA	NA	NA	NA	NA	NA	NA	171	NA	NA	0.04	6.45	NA	0.19	0.36	0.25	2.9	NA	14.7	NA	35.1	NA	83.7	NA	8283	NA	12	32	NA	MC3-41.1	North America	Western North America	Barth et al 2013
103	3	NA	NA	6.3	NA	NA	NA	NA	772	NA	NA	NA	7.17	0.031	0.69	1.66	0.45	12.6	4.75	58.8	25.2	122	28.4	257	54.4	8150	NA	43.6	103.1	HLA-47-B	HLA-47-B_40	North America	Western North America	Attia et al 2020
103	3	NA	NA	4.3	NA	NA	NA	NA	968	NA	NA	NA	8.19	0.05	1.35	2.47	0.58	17.7	6.6	81.8	34.3	161	36.2	355	68.3	8820	NA	54.9	162.6	NF16-1	NF16-1_7-R3	North America	Western North America	Attia et al 2020
103	3	NA	NA	5.1	NA	NA	NA	NA	854	NA	NA	NA	4.49	0.053	0.91	2.04	0.58	14.8	6.07	67	29.7	142	30.9	320	61	8930	NA	63.5	236.4	VT16-8	VT16-8_13	North America	Western North America	Attia et al 2020
103	3	NA	NA	5.3	NA	NA	NA	NA	930	NA	NA	NA	4.89	0.038	1.15	2.35	0.49	13.1	5.32	70.5	29.2	140.6	31.1	334	62.7	8180	NA	69.3	258.9	VT16-8	VT16-8_5	North America	Western North America	Attia et al 2020
103	3	NA	NA	5.5	NA	NA	NA	NA	1073	NA	NA	NA	6.6	0.06	1.26	3.02	0.77	19.8	6.79	92.9	35.6	163	35.6	328	65.5	8080	NA	78.2	193.7	NF16-1	NF16-1_43	North America	Western North America	Attia et al 2020
103	3	NA	NA	NA	NA	NA	NA	NA	1143	NA	NA	0.00529	9.7	0.088	0.42	5.6	0.65	34	9.1	91	41.1	177	39.9	378	67.2	9030	NA	81.1	104	VT15-17-b	VT15-17-b_12	North America	Western North America	Attia et al 2020
103	2	NA	NA	7.2	NA	NA	NA	NA	1175	NA	NA	NA	11.48	0.079	1.23	3.43	0.8	21	7.6	97.9	38.9	184.6	42.1	371	79.2	7600	NA	81.1	172.1	HLA-47-B	HLA-47-B_7	North America	Western North America	Attia et al 2020
103	2	NA	NA	6.5	NA	NA	NA	NA	1035	NA	NA	NA	11.86	0.077	1.47	2.57	0.696	16.2	6.32	87.9	35.5	164	37.3	356	68.7	7460	NA	85	182.3	HLA-47-B	HLA-47-B_22	North America	Western North America	Attia et al 2020
103	3	NA	NA	6.02	NA	NA	NA	NA	862	NA	NA	NA	11.1	0.239	1.93	2.88	0.568	17.6	5.64	71.3	28.3	141	29.5	296	53.6	8460	NA	86.9	201	NF16-1	NF16-1_38	North America	Western North America	Attia et al 2020
103	3	NA	NA	NA	NA	NA	NA	NA	1235	NA	NA	0.00502	12.3	0.037	0.15	6.4	0.56	20.9	11.5	97	44.9	189	51.5	458	75.6	7850	NA	103.8	173	VT15-17-b	VT15-17-b_3C	North America	Western North America	Attia et al 2020
103	2	NA	NA	3.04	NA	NA	NA	NA	1298	NA	NA	NA	4.27	0.047	1.26	3.16	0.73	22.6	7.96	102.4	41.9	193	41.4	381	75.3	8290	NA	111.7	467	VT16-9	VT16-9_28	North America	Western North America	Attia et al 2020
103	3	NA	NA	8.7	NA	NA	NA	NA	1700	NA	NA	NA	10.11	0.255	4.29	8.26	1.68	44.2	12.4	156	57.9	252	53.7	476	90	8780	NA	121.5	198	NF16-1	NF16-1_17	North America	Western North America	Attia et al 2020
103	3	NA	NA	3.65	NA	NA	NA	NA	1660	NA	NA	NA	5.82	0.135	2.16	5.72	1.14	38.4	12.7	155	59.6	263	54.4	489	87	8590	NA	150	439	VT16-9	VT16-9_33	North America	Western North America	Attia et al 2020
103	3	NA	NA	3.7	NA	NA	NA	NA	1646	NA	NA	NA	8.99	0.148	2.53	6.07	0.63	38.8	13.33	155	60.2	256.8	50.8	473	89.2	10090	NA	170.1	431	DL16-58	DL16-58_16-C3	North America	Western North America	Attia et al 2020
103	3	NA	NA	19	NA	NA	NA	NA	1510	NA	NA	0.00537	18.4	0.013	1.3	19	1.31	26.2	8.2	152	51.8	237	49.4	532	100	8710	NA	174.7	293.4	VT15-17-b	VT15-17-b_62	North America	Western North America	Attia et al 2020
103	3	NA	NA	1.5	NA	NA	NA	NA	880	NA	NA	NA	12.53	0.062	0.78	1.84	0.327	13.6	5.08	68.5	28.5	143.4	32.4	329	63.6	11770	NA	181	518	DL16-58	DL16-58_26-R4	North America	Western North America	Attia et al 2020
103	3	NA	NA	1.15	NA	NA	NA	NA	657	NA	NA	NA	8.86	0.025	0.51	1.08	0.243	8.4	3.52	45.9	20.4	107.3	25	267	51.7	12820	NA	189.1	603	DL16-58	DL16-58_17	North America	Western North America	Attia et al 2020
103	3	NA	NA	8	NA	NA	NA	NA	1240	NA	NA	NA	20.5	0.101	1.21	3.3	0.53	21.3	8.01	95.4	41	194	43.5	455	85.3	11100	NA	201	485	VT17-2	VT17-2-16	North America	Western North America	Attia et al 2020
103	3	NA	NA	58	NA	NA	NA	NA	889	NA	NA	0.0029	12.8	NA	0.19	5.4	0.94	13.1	5.6	54.7	32.6	151	35	300	73.5	8190	NA	205.3	242.8	VT15-17-b	VT15-17-b_33	North America	Western North America	Attia et al 2020
103	3	NA	NA	6.76	NA	NA	NA	NA	1950	NA	NA	NA	16.56	0.09	1.94	4.94	0.98	31.8	12	154	63.4	284	64.2	594	108.3	8450	NA	211.6	474	DL16-58	DL16-58_30	North America	Western North America	Attia et al 2020
103	3	NA	NA	36	NA	NA	NA	NA	2270	NA	NA	0.733	76.9	1.76	17.4	56	5.6	80	20.2	185	84.1	347	75.3	664	143.8	8490	NA	247.3	266.4	VT15-17-b	VT15-17-b_42	North America	Western North America	Attia et al 2020
103	3	NA	NA	2.88	NA	NA	NA	NA	898	NA	NA	NA	11.39	0.088	1.14	2.3	0.28	13.2	5.08	70.5	30.2	149	34.9	372	69.3	11770	NA	265.2	805	DL16-58	DL16-58_24	North America	Western North America	Attia et al 2020
103	2	NA	NA	4.2	NA	NA	NA	NA	1490	NA	NA	NA	31	0.056	1.21	3.52	0.64	21.7	8.95	117.4	50.7	260	59.6	543	113	11400	NA	302	577	HLA-47-B	HLA-47-B_16	North America	Western North America	Attia et al 2020
103	2	NA	NA	26	NA	NA	NA	NA	2460	NA	NA	0.003	28.7	0.023	1.27	14	2.25	47	19.8	183	83	362	88.3	821	171	8430	NA	442	456.3	VT15-17-b	VT15-17-b_25	North America	Western North America	Attia et al 2020
103	4	NA	NA	9.6	NA	NA	NA	NA	3050	NA	NA	NA	50.4	1.72	12.4	20	8.8	87.9	26.5	276	103	459	96.1	943	158.1	7560	NA	515	404	VT17-2	VT17-2-19	North America	Western North America	Attia et al 2020
103	2	NA	NA	NA	NA	NA	NA	NA	3230	NA	NA	0.56	77	1.56	9	24.6	2.9	104	31.5	293	111.5	499	114.2	935	183.8	8280	NA	562.3	539.2	VT15-17-b	VT15-17-b_5	North America	Western North America	Attia et al 2020
103	2	NA	NA	7.8	NA	NA	NA	NA	4560	NA	NA	NA	31.6	0.52	7.3	17.4	3.24	108	36.3	426	162	740	144	1340	230	8760	NA	1229	2220	VT16-9	VT16-9_22	North America	Western North America	Attia et al 2020
103.2856567	2.313331405	NA	186.9513439	NA	NA	NA	NA	NA	826.804837	NA	NA	0.339204893	11.15754278	NA	NA	1.877682846	0.275409527	NA	NA	62.90354977	NA	NA	NA	NA	61.87095079	NA	NA	242.1077503	642.2126146	NA	callen\070418\sjo-053	North America	Western US	Zhu et al 2020
103.3947541	2.302452667	NA	368.6742314	NA	NA	NA	NA	NA	NA	NA	NA	0.097725129	66.49215635	NA	1.925306715	4.170459194	1.29845128	NA	NA	115.7274331	NA	NA	NA	NA	87.13778851	NA	NA	626.7572971	740.1001994	NA	callen\020917\CR-109	North America	Western US	Zhu et al 2020
103.5050476	2.445608584	NA	105.575974	NA	NA	NA	NA	NA	743.6492062	NA	NA	NA	8.313418499	NA	NA	3.633717344	0.867311532	NA	NA	66.17180199	NA	NA	NA	NA	44.53200931	NA	NA	205.9096752	438.2649066	NA	callen\070418\sjo-049	North America	Western US	Zhu et al 2020
103.9349165	3.139580286	NA	276.6856684	NA	NA	NA	NA	NA	NA	NA	NA	0.109428983	4.788638036	NA	0.882872888	1.842261716	0.355426109	NA	NA	50.62169194	NA	NA	NA	NA	35.11909389	NA	NA	29.81277245	85.62369653	NA	callen\020917\CR-046	North America	Western US	Zhu et al 2020
103.986504	3	NA	256.1	NA	NA	NA	NA	NA	NA	NA	NA	0.075	5.27	NA	0.97	NA	0.346	NA	NA	68.9	NA	NA	NA	NA	71.8	NA	NA	101.7	314.5	NA	bei chen\171201\Flinders-127	Australia	Eastern Australia	Zhu et al 2020
104	4	NA	NA	11	NA	NA	NA	NA	568	NA	NA	0.0028	8.5	0.013	0.23	1.5	0.32	9.5	3.54	53	19.1	90.6	18.1	190	39.2	8560	NA	37.5	81.9	VT15-17-b	VT15-17-b_66	North America	Western North America	Attia et al 2020
104	4	NA	NA	9	NA	NA	NA	NA	819	NA	NA	NA	4.04	0.45	2.65	4.66	2.66	18.3	6.58	69	24.5	123	26.7	280	56.8	7660	NA	43	95	VT17-2	VT17-2-26	North America	Western North America	Attia et al 2020
104	3	NA	NA	NA	NA	NA	NA	NA	536	NA	NA	0.00508	8.5	NA	0.41	0.8	1.11	9.5	4.8	41.8	17	85.7	20.7	169	35	8310	NA	50.4	101.7	VT15-17-b	VT15-17-b_3R	North America	Western North America	Attia et al 2020
104	3	NA	NA	9.9	NA	NA	NA	NA	847	NA	NA	NA	8.21	0.056	1.2	2.35	0.692	16.7	5.99	72.8	28.9	132.7	29.2	288	55	8910	NA	77.8	174.9	NF16-1	NF16-1_29-R5	North America	Western North America	Attia et al 2020
104	NA	NA	NA	NA	NA	NA	NA	NA	1803	NA	NA	0.07	8.56	NA	2.35	5.57	1.05	47.1	NA	190.3	NA	322.3	NA	519.3	NA	9722	NA	130	299	NA	MC4-51.1	North America	Western North America	Barth et al 2013
104	2	NA	NA	5.5	NA	NA	NA	NA	1032	NA	NA	NA	16	0.06	1.27	3	0.435	19	7	86.9	34.2	159	35.6	304	64.1	9000	NA	141	229	HLA-47-B	HLA-47-B_6	North America	Western North America	Attia et al 2020
104	3	NA	NA	1.6	NA	NA	NA	NA	808	NA	NA	NA	9.33	0.024	0.63	1.33	0.197	10.5	4.26	58.9	28.2	141	34.5	406	74.6	12600	NA	145.2	532	DL16-58	DL16-58_5	North America	Western North America	Attia et al 2020
104	3	NA	NA	0.69	NA	NA	NA	NA	611	NA	NA	NA	9.64	0.02	0.48	1.02	0.275	8.6	3.47	41.5	19	96.7	21.8	273	51.3	10710	NA	162	534	DL16-58	DL16-58_2	North America	Western North America	Attia et al 2020
104	3	NA	NA	2.6	NA	NA	NA	NA	761	NA	NA	0.00442	9.84	0.042	0.97	2.03	0.272	12.2	4.4	60.1	25	122	28.3	293	53.5	9960	NA	167.5	466	DL16-58	DL16-58_29	North America	Western North America	Attia et al 2020
104	3	NA	NA	2.8	NA	NA	NA	NA	1370	NA	NA	0.00489	9.94	0.067	1.27	2.8	0.44	22.1	7.4	97	38.4	187	44.6	462	84.9	9610	NA	174	410	DL16-58	DL16-58_25-C4	North America	Western North America	Attia et al 2020
104	NA	NA	NA	NA	NA	NA	NA	NA	957	NA	NA	0.01	31.31	NA	0.7	1.96	0.95	17.9	NA	87.5	NA	185.1	NA	415.3	NA	9517	NA	184	373	NA	327-34.1	North America	Western North America	Barth et al 2013
104	4	NA	NA	1.71	NA	NA	NA	NA	889	NA	NA	NA	11.92	0.0402	0.83	1.3	0.313	13	4.43	60.8	25.8	138	33.5	368	69.9	10810	NA	196.6	618	DL16-58	DL16-58_40	North America	Western North America	Attia et al 2020
104	4	NA	NA	5.8	NA	NA	NA	NA	950	NA	NA	NA	7.3	0.066	1.18	2.8	0.425	16.1	6.7	82	34.9	163	35.7	338	69	10270	NA	254	481	DL16-58	DL16-58_8-C2	North America	Western North America	Attia et al 2020
104	2	NA	NA	2.2	NA	NA	NA	NA	1623	NA	NA	NA	14.03	0.065	1.55	4.16	0.433	28.9	11	136	55.4	266	53.3	456	100	11750	NA	258	610	HLA-47-B	HLA-47-B_18	North America	Western North America	Attia et al 2020
104	4	NA	NA	31	NA	NA	NA	NA	1710	NA	NA	0.00526	15.3	0.089	2.2	30	6.7	49	15.1	155	63	211	58	590	93	7760	NA	271	291	VT15-17-b	VT15-17-b_50	North America	Western North America	Attia et al 2020
104	2	NA	NA	2.79	NA	NA	NA	NA	2620	NA	NA	NA	11.2	0.196	3.66	8.3	1.45	50.9	19.2	216	80	389	77	740	127	8820	NA	382	1016	VT16-9	VT16-9_6	North America	Western North America	Attia et al 2020
104	4	NA	NA	2.2	NA	NA	NA	NA	1470	NA	NA	0.00437	17.4	0.041	1.06	4.63	0.1	30.7	10.6	146	55.7	252	48.9	466	83.6	13500	NA	411	967	DL16-58	DL16-58_39	North America	Western North America	Attia et al 2020
104	3	NA	NA	4.7	NA	NA	NA	NA	1550	NA	NA	NA	10.43	0.057	1.25	4.49	1.05	27	10.74	133	51.6	237	53.9	542	99	8140	NA	436	653	VT16-8	VT16-8_15	North America	Western North America	Attia et al 2020
104	2	NA	NA	2.8	NA	NA	NA	NA	1870	NA	NA	NA	14.7	0.159	2.53	5.39	1.167	41.8	14.49	169	62.4	275	54.5	514	82.4	8060	NA	471	768	VT16-9	VT16-9_27	North America	Western North America	Attia et al 2020
104	2	NA	NA	19	NA	NA	NA	NA	1350	NA	NA	0.011	26.8	0.052	0.07	7	2.7	28.4	9.1	93	47.2	218	49.3	452	94	7960	NA	479	399	VT15-17-b	VT15-17-b_32	North America	Western North America	Attia et al 2020
104	3	NA	NA	2.02	NA	NA	NA	NA	2930	NA	NA	NA	20.5	0.267	4.5	8.8	1.24	59	21.6	267	96	441	92	752	143	11900	NA	490	1298	NF16-1	NF16-1_5-C2	North America	Western North America	Attia et al 2020
104	2	NA	NA	3	NA	NA	NA	NA	4410	NA	NA	NA	39.9	0.223	4.39	13.7	0.094	104.2	36.4	426	157	676	136	1110	194	10660	NA	1515	2910	HLA-47-B	HLA-47-B_28-C1	North America	Western North America	Attia et al 2020
104.1	2.5	NA	NA	15.1	NA	NA	0.66	NA	1430	NA	52	1.56	123	4.97	42.5	33	16.9	89	23.2	237	64.8	238	41.9	323	42.2	5630	8.5	750	362	NA	02SS12a_66	Asia	Iran	Barber et al 2019
104.2	5.1	NA	216.8	NA	NA	NA	NA	NA	919	NA	NA	0.008	8.37	NA	2.32	4.85	1.296	NA	NA	82	NA	NA	NA	NA	54.72	NA	NA	83.7	100.9	NA	bei chen\180930\Murray1-055	Australia	Eastern Australia	Zhu et al 2020
104.2	3.3	NA	321	NA	NA	NA	NA	NA	NA	NA	NA	0.072	14.22	NA	1.33	NA	0.622	NA	NA	108.3	NA	NA	NA	NA	90.1	NA	NA	127	161	NA	bei chen\171130\Cooper-030	Australia	Eastern Australia	Zhu et al 2020
104.2809166	2.773040156	NA	357.5065312	NA	NA	NA	NA	NA	1184.836571	NA	NA	0.247499433	8.680996491	NA	NA	2.710291797	0.394073795	NA	NA	96.60537134	NA	NA	NA	NA	73.71939543	NA	NA	135.2544091	388.2518455	NA	callen\070418\sjo-036	North America	Western US	Zhu et al 2020
104.4350423	2.521269203	NA	218.2858918	NA	NA	NA	NA	NA	833.8190948	NA	NA	NA	11.39483562	NA	NA	2.858574009	0.774425838	NA	NA	70.40343638	NA	NA	NA	NA	51.62611215	NA	NA	304.4239065	553.4905997	NA	callen\070418\sjo-042	North America	Western US	Zhu et al 2020
104.545322	2.474031465	NA	245.3476218	NA	NA	NA	NA	NA	1752.90429	NA	NA	0.1669714	10.84596035	NA	NA	11.55298739	3.789063962	NA	NA	158.0082138	NA	NA	NA	NA	102.2003657	NA	NA	362.6065362	570.7377148	NA	callen\070418\sjo-097	North America	Western US	Zhu et al 2020
104.8866693	2.658018953	NA	153.2835902	NA	NA	NA	NA	NA	1183.236796	NA	NA	0.060682245	8.289656579	NA	NA	6.748271551	0.947846043	NA	NA	116.8679147	NA	NA	NA	NA	61.18807769	NA	NA	130.1824382	289.2416729	NA	callen\070418\sjo-027	North America	Western US	Zhu et al 2020
104.9	3.5	NA	312	NA	NA	NA	NA	NA	NA	NA	NA	0.072	10.53	NA	3.06	NA	1.09	NA	NA	117.2	NA	NA	NA	NA	70.2	NA	NA	161	163	NA	bei chen\171130\Cooper-090	Australia	Eastern Australia	Zhu et al 2020
105	3	NA	NA	2.6	NA	NA	NA	NA	853	NA	NA	NA	3.28	0.039	1	2.58	0.56	15.1	5.56	68.1	28.3	129	31	291	57.2	8830	NA	47.8	173	VT16-8	VT16-8_28	North America	Western North America	Attia et al 2020
105	3	NA	NA	2.1	NA	NA	NA	NA	513	NA	NA	NA	6.4	0.022	0.53	0.77	0.151	6.7	2.72	36.5	15.6	83	19.5	208	39.9	11400	NA	81.3	292.2	DL16-58	DL16-58_6	North America	Western North America	Attia et al 2020
105	2	NA	NA	2.4	NA	NA	NA	NA	656	NA	NA	NA	10.18	0.051	0.75	1.93	0.29	11.5	4.96	62.4	22.6	104	24.4	209	42.4	11730	NA	122.8	360	HLA-47-B	HLA-47-B_15	North America	Western North America	Attia et al 2020
105	4	NA	NA	11.8	NA	NA	NA	NA	1178	NA	NA	NA	8.73	0.36	1.51	4.02	1.44	23.1	8.34	98.8	38.8	198	43.7	496	103.1	8080	NA	152	355	VT17-2	VT17-2-28	North America	Western North America	Attia et al 2020
105	NA	NA	NA	NA	NA	NA	NA	NA	1843	NA	NA	0.03	12.57	NA	2.95	6.48	1.68	54.9	NA	196.5	NA	306.8	NA	479.1	NA	9487	NA	179	367	NA	321-5	North America	Western North America	Barth et al 2013
105	3	NA	NA	1.45	NA	NA	NA	NA	1039	NA	NA	NA	10.2	0.1	1.1	2.38	0.433	14.9	5.81	75.8	32.3	165	40	416	81.4	11920	NA	223.6	546	DL16-58	DL16-58_11	North America	Western North America	Attia et al 2020
105	2	NA	NA	25	NA	NA	NA	NA	2690	NA	NA	0.0028	37.5	0.072	1.4	36	2.6	58	15.3	257	98	392	90	821	125.7	8460	NA	329.3	423.9	VT15-17-b	VT15-17-b_58	North America	Western North America	Attia et al 2020
105	2	NA	NA	150	NA	NA	NA	NA	1709	NA	NA	6.00E-04	31.3	NA	0.2	7.3	0.92	48.4	12.6	117	52.6	265	59.6	532	105	8970	NA	414.1	408.5	VT15-17-b	VT15-17-b_18	North America	Western North America	Attia et al 2020
105	3	NA	NA	5.2	NA	NA	NA	NA	1920	NA	NA	NA	14.8	0.126	1.79	6.51	1.27	42.8	14.5	169	64.7	282	63.5	574	109.1	8340	NA	422	847	VT16-8	VT16-8_10	North America	Western North America	Attia et al 2020
105	3	NA	NA	0.9	NA	NA	NA	NA	2780	NA	NA	NA	36.4	1.28	7.75	15.6	4.84	72.1	22.7	251	92.7	415	89.8	895	157	8240	NA	574	678	VT17-2	VT17-2-31	North America	Western North America	Attia et al 2020
105.0538506	2.478570894	NA	298.5980785	NA	NA	NA	NA	NA	1682.000289	NA	NA	NA	11.61734629	NA	NA	5.109154301	0.601570772	NA	NA	144.3919614	NA	NA	NA	NA	94.72419812	NA	NA	227.3757364	508.6294015	NA	callen\070418\sjo-069	North America	Western US	Zhu et al 2020
105.1541439	2.745899433	NA	152.6972873	NA	NA	NA	NA	NA	NA	NA	NA	NA	7.869784196	NA	1.007662304	1.233709289	0.231510239	NA	NA	15.46002716	NA	NA	NA	NA	10.66469939	NA	NA	84.31327421	124.730004	NA	callen\020917\CR-104	North America	Western US	Zhu et al 2020
105.2015212	2.9	NA	288	NA	NA	NA	NA	NA	NA	NA	NA	0.082	11.74	NA	2.02	NA	0.638	NA	NA	101.4	NA	NA	NA	NA	64.48	NA	NA	204.8	337.6	NA	bei chen\171201\Flinders-131	Australia	Eastern Australia	Zhu et al 2020
105.2365613	3.6	NA	142.8	NA	NA	NA	NA	NA	NA	NA	NA	0.0164	6.18	NA	0.552	NA	0.573	NA	NA	26.53	NA	NA	NA	NA	37.02	NA	NA	49.7	113.3	NA	bei chen\171201\Cooper-097	Australia	Eastern Australia	Zhu et al 2020
105.348022	2.587981757	NA	129.8627154	NA	NA	NA	NA	NA	NA	NA	NA	NA	10.91710985	NA	1.53215184	NA	0.471164387	NA	NA	51.23328714	NA	NA	NA	NA	34.76027786	NA	NA	94.16127207	170.5480194	NA	callen\010726\NEG-077	South America	South America	Zhu et al 2020
105.4967263	2.316058432	NA	184.2826438	NA	NA	NA	NA	NA	NA	NA	NA	0.076263588	36.26260735	NA	8.935553144	10.87484723	1.826741829	NA	NA	100.3622387	NA	NA	NA	NA	47.65372847	NA	NA	513.7391388	498.4384709	NA	callen\020917\CR-090	North America	Western US	Zhu et al 2020
105.5480427	2.638757334	NA	159.0697625	NA	NA	NA	NA	NA	740.6589698	NA	NA	NA	4.596962162	NA	NA	3.271070419	1.354061901	NA	NA	64.19311314	NA	NA	NA	NA	50.30895656	NA	NA	151.9957879	340.4105931	NA	callen\070418\stl-072	North America	Canada	Zhu et al 2020
105.5678633	2.692645851	NA	315.2358178	NA	NA	NA	NA	NA	3176.016669	NA	NA	NA	12.07707982	NA	NA	19.71663461	3.420941177	NA	NA	328.4074822	NA	NA	NA	NA	141.4070193	NA	NA	296.3921812	475.2764411	NA	callen\070418\sjo-045	North America	Western US	Zhu et al 2020
105.5871685	2.452085243	NA	239.8534963	NA	NA	NA	NA	NA	NA	NA	NA	NA	28.68738736	NA	4.966172048	9.857260357	3.421056487	NA	NA	134.7125166	NA	NA	NA	NA	37.37565348	NA	NA	171.5365718	297.7201121	NA	callen\020917\CR-115	North America	Western US	Zhu et al 2020
105.6017551	3.82010126	NA	147.5718547	NA	NA	NA	NA	NA	689.5832027	NA	NA	0.109169889	14.95542068	NA	NA	3.06860443	0.773678518	NA	NA	59.03966537	NA	NA	NA	NA	43.21158857	NA	NA	245.0287798	258.3334123	NA	callen\080416\negt-111	South America	South America	Zhu et al 2020
105.7316229	2.678308669	NA	130.08835	NA	NA	NA	NA	NA	440.9594377	NA	NA	NA	7.22655941	NA	NA	1.546427529	0.40243249	NA	NA	36.68066142	NA	NA	NA	NA	33.48512873	NA	NA	98.62743423	241.6473457	NA	callen\070418\sjo-034	North America	Western US	Zhu et al 2020
105.8120831	2.294900552	NA	271.8420006	NA	NA	NA	NA	NA	1061.952943	NA	NA	NA	16.80405754	NA	NA	2.986697383	0.980736628	NA	NA	86.72038361	NA	NA	NA	NA	73.02118798	NA	NA	460.7075785	761.7346114	NA	callen\070418\sjo-041	North America	Western US	Zhu et al 2020
106	3	NA	NA	21	NA	NA	NA	NA	1145	NA	NA	0.017	15	0.099	1.2	9.1	2.1	25.9	6.6	109	44	155	46.7	441	70.3	8210	NA	97.2	162.8	VT15-17-b	VT15-17-b_55	North America	Western North America	Attia et al 2020
106	NA	NA	NA	NA	NA	NA	NA	NA	399	NA	NA	0.02	7.75	NA	0.19	0.61	0.24	6.17	NA	34.2	NA	79.2	NA	194	NA	11144	NA	122	410	NA	MC3-22.1	North America	Western North America	Barth et al 2013
106	3	NA	NA	22	NA	NA	NA	NA	1560	NA	NA	0.19	33.4	0.36	1.9	25.3	4.4	32	10.5	116	54.4	221	53.6	520	99	8440	NA	165.3	268.3	VT15-17-b	VT15-17-b_45	North America	Western North America	Attia et al 2020
106.1160762	2.438231072	NA	228.5142408	NA	NA	NA	NA	NA	1169.897422	NA	NA	NA	9.564677044	NA	NA	2.999703176	0.305224025	NA	NA	103.7580102	NA	NA	NA	NA	66.75239075	NA	NA	200.6462487	559.7627025	NA	callen\070418\sjo-030	North America	Western US	Zhu et al 2020
106.1933232	2.601148556	NA	271.4985087	NA	NA	NA	NA	NA	1185.624019	NA	NA	0.135018032	12.85877256	NA	NA	5.243776706	1.526436272	NA	NA	104.6839203	NA	NA	NA	NA	69.47546054	NA	NA	309.6214494	483.9371649	NA	callen\070418\sjo-084	North America	Western US	Zhu et al 2020
106.1938155	2.752602245	NA	396.0548044	NA	NA	NA	NA	NA	1947.33774	NA	NA	0.865206977	9.718163065	NA	NA	6.731632861	0.984770444	NA	NA	168.4102704	NA	NA	NA	NA	110.9198895	NA	NA	287.5999278	845.3235029	NA	callen\070418\sjo-056	North America	Western US	Zhu et al 2020
106.3	2.8	NA	NA	25.9	NA	NA	2.57	NA	1720	NA	57	2.54	133	6.1	53	45	23.1	103	29.3	280	78	270	53.3	432	48.7	5420	12.6	520	328	NA	02SS12a_56	Asia	Iran	Barber et al 2019
106.5074919	4.021383279	NA	124.470701	NA	NA	NA	NA	NA	1051.981334	NA	NA	0.123360819	10.47982212	NA	NA	6.983089747	1.406984931	NA	NA	102.3870004	NA	NA	NA	NA	59.43981053	NA	NA	188.3656217	198.2457582	NA	callen\080416\negt-166	South America	South America	Zhu et al 2020
106.5287348	2.590897263	NA	331.0787168	NA	NA	NA	NA	NA	4264.077815	NA	NA	NA	26.26035016	NA	NA	29.16968183	4.084496512	NA	NA	459.7019012	NA	NA	NA	NA	177.8227679	NA	NA	545.8925424	700.4822568	NA	callen\070418\sjo-044	North America	Western US	Zhu et al 2020
106.6429885	3.189476723	NA	249.5142256	NA	NA	NA	NA	NA	894.6534066	NA	NA	0.437409865	20.57418384	NA	NA	2.721632903	0.380296741	NA	NA	74.27443028	NA	NA	NA	NA	70.04398762	NA	NA	458.0181824	972.7272323	NA	callen\070418\sjo-072	North America	Western US	Zhu et al 2020
106.8086418	3.882550016	NA	233.5942746	NA	NA	NA	NA	NA	875.4057364	NA	NA	NA	27.22213081	NA	5.530014341	7.451141864	2.694007825	NA	NA	84.77561907	NA	NA	NA	NA	60.93622326	NA	NA	130.1694571	87.36629998	NA	callen\040726\zey-129	Asia	Russia	Zhu et al 2020
106.8969715	3.4	NA	162.3	NA	NA	NA	NA	NA	NA	NA	NA	0.061	6.83	NA	1.02	NA	0.647	NA	NA	42.1	NA	NA	NA	NA	49.23	NA	NA	100	172	NA	bei chen\171201\Flinders-109	Australia	Eastern Australia	Zhu et al 2020
106.9311765	2.999353388	NA	266.1845623	NA	NA	NA	NA	NA	1427.133568	NA	NA	0.142696601	23.45710598	NA	NA	6.106744254	1.738531716	NA	NA	118.3118239	NA	NA	NA	NA	90.30569882	NA	NA	636.1417718	1042.334241	NA	callen\070418\sjo-086	North America	Western US	Zhu et al 2020
106.9517102	2.927574803	NA	214.0949384	NA	NA	NA	NA	NA	453.4330777	NA	NA	NA	4.535274036	NA	NA	1.408673747	0.432704077	NA	NA	37.76031852	NA	NA	NA	NA	31.65750405	NA	NA	51.10196355	159.8191201	NA	callen\070418\sjo-096	North America	Western US	Zhu et al 2020
106.9597778	2.631245028	NA	119.0926754	NA	NA	NA	NA	NA	325.3998664	NA	NA	NA	4.851076478	NA	NA	1.097780038	0.320211746	NA	NA	27.79517921	NA	NA	NA	NA	23.94236901	NA	NA	58.29358577	192.34098	NA	callen\070418\sjo-011	North America	Western US	Zhu et al 2020
107	3	NA	NA	4.49	NA	NA	NA	NA	910	NA	NA	NA	4.41	0.105	1.34	2.32	0.55	16.2	6.34	78.6	32.6	150	33.1	312	61.3	8420	NA	111	295.1	VT16-9	VT16-9_1	North America	Western North America	Attia et al 2020
107	NA	NA	NA	NA	NA	NA	NA	NA	481	NA	NA	0.02	10.13	NA	0.25	0.73	0.21	7.59	NA	38.8	NA	91.5	NA	224.6	NA	11795	NA	123	431	NA	327-4.1	North America	Western North America	Barth et al 2013
107	3	NA	NA	4.9	NA	NA	NA	NA	667	NA	NA	NA	9.89	0.043	0.45	1.51	0.281	10.3	3.75	51.4	21.8	106	24.1	252	51.2	11240	NA	151.9	426	DL16-58	DL16-58_21	North America	Western North America	Attia et al 2020
107	NA	NA	NA	NA	NA	NA	NA	NA	680	NA	NA	0.03	16.94	NA	0.8	1.54	0.47	12.1	NA	55.4	NA	119.3	NA	276.5	NA	10986	NA	250	676	NA	MC3-28.1	North America	Western North America	Barth et al 2013
107	NA	NA	NA	NA	NA	NA	NA	NA	1150	NA	NA	0.02	22.78	NA	0.88	2.34	0.66	22.29	NA	98.2	NA	205.2	NA	427.5	NA	10302	NA	333	605	NA	320-22.1	North America	Western North America	Barth et al 2013
107.0649668	2.628019264	NA	210.723487	NA	NA	NA	NA	NA	685.9245908	NA	NA	NA	13.76672151	NA	NA	2.073886801	0.380616395	NA	NA	57.26431497	NA	NA	NA	NA	41.59849388	NA	NA	174.8103348	408.1066138	NA	callen\070418\sjo-064	North America	Western US	Zhu et al 2020
107.0823636	2.469888092	NA	144.8295092	NA	NA	NA	NA	NA	558.7391587	NA	NA	NA	21.0770637	NA	0.812624287	1.413479284	0.444261124	NA	NA	38.24119112	NA	NA	NA	NA	56.02313183	NA	NA	307.8387219	743.9566187	NA	callen\050127\m0-031	North America	Eastern US	Zhu et al 2020
107.0851103	2.525289397	NA	89.23457642	NA	NA	NA	NA	NA	478.8573012	NA	NA	0.073699762	8.587897279	NA	NA	1.118390721	0.284840757	NA	NA	33.15052123	NA	NA	NA	NA	57.55396	NA	NA	154.8997271	473.1235663	NA	callen\070418\sjo-006	North America	Western US	Zhu et al 2020
107.1334149	2.502869633	NA	154.2369207	NA	NA	NA	NA	NA	NA	NA	NA	NA	19.68519677	NA	1.091368063	NA	0.853946007	NA	NA	62.85341512	NA	NA	NA	NA	106.7364314	NA	NA	144.7467553	432.477806	NA	callen\010726\NEG-001	South America	South America	Zhu et al 2020
107.1863845	2.566298683	NA	123.2937986	NA	NA	NA	NA	NA	346.5551799	NA	NA	NA	8.235651154	NA	NA	1.118333482	0.330525823	NA	NA	29.13481933	NA	NA	NA	NA	24.24875998	NA	NA	133.7816606	389.273944	NA	callen\070418\sjo-054	North America	Western US	Zhu et al 2020
107.2	1.6	NA	NA	87	NA	NA	7.7	NA	2270	NA	136	2.16	68.2	8.1	79.8	70.9	37.1	168	42.4	379	94.5	326	63.5	521	62.6	4400	25.1	3140	1990	NA	02SS12a_79	Asia	Iran	Barber et al 2019
107.3143355	2.714712712	NA	139.1997011	NA	NA	NA	NA	NA	326.6349717	NA	NA	NA	4.370566315	NA	NA	1.149416333	0.383587078	NA	NA	27.51579199	NA	NA	NA	NA	22.52403741	NA	NA	56.17726249	177.9711257	NA	callen\070418\sjo-032	North America	Western US	Zhu et al 2020
107.6264808	4.009963802	NA	111.1137551	NA	NA	NA	NA	NA	333.8820841	NA	NA	0.052230575	5.096075549	NA	NA	1.226867924	0.383611506	NA	NA	29.29593791	NA	NA	NA	NA	24.5276896	NA	NA	50.95983864	151.4775839	NA	callen\070418\sjo-001	North America	Western US	Zhu et al 2020
107.6330608	2.505230737	NA	155.1714011	NA	NA	NA	NA	NA	550.5177529	NA	NA	0.050895301	6.39910961	NA	NA	1.830908735	0.533332166	NA	NA	42.27764076	NA	NA	NA	NA	41.40611252	NA	NA	102.9114026	296.2350626	NA	callen\070418\sjo-087	North America	Western US	Zhu et al 2020
107.7837862	2.574101283	NA	74.95453936	NA	NA	NA	NA	NA	NA	NA	NA	0.015680085	10.67137268	NA	1.864797852	NA	NA	NA	NA	50.53579959	NA	NA	NA	NA	29.17431972	NA	NA	150.2736461	204.3690101	NA	callen\010726\NEG-110	South America	South America	Zhu et al 2020
107.8156918	2.703658733	NA	158.1017151	NA	NA	NA	NA	NA	769.8435009	NA	NA	NA	12.80435592	NA	NA	3.285807771	0.723494825	NA	NA	71.11073453	NA	NA	NA	NA	47.22510278	NA	NA	400.375544	770.521047	NA	callen\070418\sjo-065	North America	Western US	Zhu et al 2020
107.9277023	3.517053521	NA	116.8466198	NA	NA	NA	NA	NA	NA	NA	NA	NA	2.150978499	NA	0.633926599	0.154122016	27.35056807	NA	NA	35.30924522	NA	NA	NA	NA	13.91996293	NA	NA	57.20543205	243.4138508	NA	CALLEN\010827\IND-085	Asia	Southern Asia	Zhu et al 2020
107.995504	3.242447095	NA	85.76830074	NA	NA	NA	NA	NA	297.1630292	NA	NA	NA	3.562906388	NA	NA	1.080322758	0.293094853	NA	NA	25.10907688	NA	NA	NA	NA	21.33573328	NA	NA	32.46283187	101.1991451	NA	callen\070418\sjo-029	North America	Western US	Zhu et al 2020
108	3	NA	NA	3.13	NA	NA	NA	NA	704	NA	NA	0.00469	5.89	0.03	0.64	2.07	0.25	12.8	5.17	63	26	115	26.1	241	44.4	10270	NA	102	363	NF16-1	NF16-1_4-R2	North America	Western North America	Attia et al 2020
108	NA	NA	NA	NA	NA	NA	NA	NA	1251	NA	NA	0.03	15.8	NA	2.06	4.31	1.29	33.75	NA	135.2	NA	235	NA	435.9	NA	9982	NA	152	339	NA	327-6.1	North America	Western North America	Barth et al 2013
108.0124214	2.47771867	NA	196.378921	NA	NA	NA	NA	NA	834.1903763	NA	NA	NA	11.16936665	NA	NA	2.257404493	0.689841305	NA	NA	61.92276941	NA	NA	NA	NA	68.11931427	NA	NA	230.8313947	536.9732536	NA	callen\070418\sjo-015	North America	Western US	Zhu et al 2020
108.1282246	2.538017879	NA	155.836861	NA	NA	NA	NA	NA	543.2776462	NA	NA	NA	7.944416419	NA	NA	1.837308097	0.43136982	NA	NA	47.08748683	NA	NA	NA	NA	32.86496941	NA	NA	105.1980646	292.6656885	NA	callen\070418\sjo-047	North America	Western US	Zhu et al 2020
108.2238338	3.093827158	NA	127.4842083	NA	NA	NA	NA	NA	354.9082811	NA	NA	NA	4.778671463	NA	NA	1.222068751	0.412641876	NA	NA	28.52573892	NA	NA	NA	NA	24.5599958	NA	NA	63.46473452	179.0739156	NA	callen\070418\sjo-035	North America	Western US	Zhu et al 2020
108.2807678	2.48797417	NA	82.32298457	NA	NA	NA	NA	NA	278.4860044	NA	NA	NA	4.990017349	NA	NA	0.674014995	0.190528787	NA	NA	19.94123812	NA	NA	NA	NA	31.11774474	NA	NA	134.0914874	553.5848674	NA	callen\070418\sjo-003	North America	Western US	Zhu et al 2020
108.3311964	2.524896805	NA	135.5688643	NA	NA	NA	NA	NA	459.4382295	NA	NA	NA	8.197608125	NA	NA	1.791362038	0.458853055	NA	NA	39.12162418	NA	NA	NA	NA	33.67167823	NA	NA	171.6985637	475.953526	NA	callen\070418\sjo-023	North America	Western US	Zhu et al 2020
108.3946081	2.509696039	NA	175.528864	NA	NA	NA	NA	NA	846.7523565	NA	NA	NA	8.818273984	NA	NA	4.346460673	1.068302894	NA	NA	71.89924236	NA	NA	NA	NA	58.5499071	NA	NA	271.2169603	514.476635	NA	callen\070418\sjo-037	North America	Western US	Zhu et al 2020
108.5025803	2.587023488	NA	209.8543761	NA	NA	NA	NA	NA	NA	NA	NA	NA	10.91709638	NA	0.756492791	1.617341828	0.283202339	NA	NA	45.32020572	NA	NA	NA	NA	45.52070314	NA	NA	255.9562001	627.8262724	NA	callen\020917\CR-154	North America	Western US	Zhu et al 2020
108.7	3.5	NA	151.8	NA	NA	NA	NA	NA	NA	NA	NA	0.029	11.91	NA	0.74	NA	0.653	NA	NA	33.7	NA	NA	NA	NA	44.7	NA	NA	109.7	190.9	NA	bei chen\171201\Flinders-017	Australia	Eastern Australia	Zhu et al 2020
108.9	2.9	NA	217.7	NA	NA	NA	NA	NA	NA	NA	NA	0.0148	10.05	NA	0.432	NA	0.793	NA	NA	48.1	NA	NA	NA	NA	88.9	NA	NA	56.4	208.7	NA	bei chen\171201\Cooper-110	Australia	Eastern Australia	Zhu et al 2020
109	NA	NA	NA	NA	NA	NA	NA	NA	983	NA	NA	0.02	13.1	NA	0.95	2.22	0.83	18.99	NA	90.1	NA	187.7	NA	403.5	NA	9262	NA	89	244	NA	MC3-39.1	North America	Western North America	Barth et al 2013
109	4	NA	NA	16.7	NA	NA	NA	NA	2020	NA	NA	NA	16.3	0.99	4.03	10.2	4.16	42.9	16.23	184	67	324	64.3	647	134.4	7180	NA	248	290	VT17-2	VT17-2-39	North America	Western North America	Attia et al 2020
109	3	NA	NA	9.8	NA	NA	NA	NA	3960	NA	NA	NA	44.5	2.35	12.3	24.1	6.38	97	32.7	348	143	607	130	1310	243	7800	NA	799	957	VT17-2	VT17-2-2	North America	Western North America	Attia et al 2020
109.2118026	2.763232393	NA	110.5861707	NA	NA	NA	NA	NA	508.6293015	NA	NA	0.052424157	6.50572824	NA	NA	2.651069853	0.791599954	NA	NA	49.30849839	NA	NA	NA	NA	32.29032721	NA	NA	104.413609	266.8113321	NA	callen\070418\sjo-090	North America	Western US	Zhu et al 2020
109.3768443	2.841579631	NA	178.0190302	NA	NA	NA	NA	NA	689.0686072	NA	NA	NA	6.210639508	NA	NA	1.492606227	0.419340718	NA	NA	50.55939953	NA	NA	NA	NA	56.93020901	NA	NA	103.3217424	307.9406835	NA	callen\070418\sjo-092	North America	Western US	Zhu et al 2020
109.3918877	2.77289324	NA	183.2703391	NA	NA	NA	NA	NA	664.9053599	NA	NA	NA	8.674855559	NA	NA	1.789830897	0.540162443	NA	NA	52.85675267	NA	NA	NA	NA	49.54360145	NA	NA	225.3882317	593.9848685	NA	callen\070418\sjo-004	North America	Western US	Zhu et al 2020
109.6687567	2.355600438	NA	71.4575398	NA	NA	NA	NA	NA	NA	NA	NA	0.221818914	50.39010825	NA	21.48134452	NA	0.707467	NA	NA	320.3244488	NA	NA	NA	NA	138.5490754	NA	NA	772.7046691	715.9275783	NA	callen\010726\NEG-049	South America	South America	Zhu et al 2020
109.6807923	2.765036358	NA	191.6421898	NA	NA	NA	NA	NA	988.3339108	NA	NA	NA	17.07302792	NA	NA	5.464732242	0.731007732	NA	NA	95.92097532	NA	NA	NA	NA	48.21522184	NA	NA	242.5196153	391.1846167	NA	callen\070418\sjo-063	North America	Western US	Zhu et al 2020
109.6957623	2.47267593	NA	264.0826617	NA	NA	NA	NA	NA	1242.414923	NA	NA	NA	11.69341526	NA	NA	3.189709619	0.91009295	NA	NA	93.07433328	NA	NA	NA	NA	103.3663642	NA	NA	268.9890107	700.1356567	NA	callen\070418\sjo-005	North America	Western US	Zhu et al 2020
109.7035684	2.855952342	NA	347.6662279	NA	NA	NA	NA	NA	1805.342712	NA	NA	NA	17.50186892	NA	NA	4.151211829	1.112545697	NA	NA	140.8097268	NA	NA	NA	NA	132.216705	NA	NA	557.9318616	984.6793849	NA	callen\070418\sjo-014	North America	Western US	Zhu et al 2020
109.7146588	2.611502737	NA	235.6658494	NA	NA	NA	NA	NA	1346.253858	NA	NA	NA	7.950016849	NA	NA	5.497685643	1.338552918	NA	NA	117.1915275	NA	NA	NA	NA	89.48835313	NA	NA	204.6488203	392.2004046	NA	callen\070418\sjo-050	North America	Western US	Zhu et al 2020
109.7773231	6.778430972	NA	199.5201269	NA	NA	NA	NA	NA	390.4740986	NA	NA	NA	8.200500581	NA	2.229390799	3.334653415	0.90685495	NA	NA	37.10885559	NA	NA	NA	NA	31.67106773	NA	NA	45.15456148	59.34295741	NA	callen\040726\zey-111	Asia	Russia	Zhu et al 2020
109.8311597	2.896296268	NA	140.5357885	NA	NA	NA	NA	NA	520.3906769	NA	NA	NA	6.270505012	NA	NA	2.538713712	0.746682874	NA	NA	46.35799608	NA	NA	NA	NA	32.36994141	NA	NA	90.51296118	219.8812379	NA	callen\070418\sjo-093	North America	Western US	Zhu et al 2020
110	NA	NA	NA	NA	NA	NA	NA	NA	640	NA	NA	0.01	9.23	NA	0.36	1.17	0.27	13	NA	58.6	NA	110.2	NA	191.9	NA	11546	NA	67	139	NA	320-43.1	North America	Western North America	Barth et al 2013
110	3	NA	NA	9.4	NA	NA	NA	NA	4010	NA	NA	0.109	26.1	2.85	17.1	27.4	8.8	111.9	35.7	368	133.1	594	111.5	1080	215	8440	NA	712	699	VT17-2	VT17-2-33	North America	Western North America	Attia et al 2020
110.1371368	4.520383747	NA	141.1491887	NA	NA	NA	NA	NA	1349.56452	NA	NA	NA	23.29559457	NA	NA	6.282509225	1.183537662	NA	NA	128.8264264	NA	NA	NA	NA	75.75982427	NA	NA	298.5135819	274.5658332	NA	callen\080319\negt-013	South America	South America	Zhu et al 2020
110.1402204	3.414618773	NA	171.4837434	NA	NA	NA	NA	NA	NA	NA	NA	0.075124922	24.76190964	NA	1.134701959	2.385790673	0.479446679	NA	NA	80.57345531	NA	NA	NA	NA	71.38423123	NA	NA	252.9720937	578.300867	NA	callen\020917\CR-073	North America	Western US	Zhu et al 2020
110.1527682	2.505938101	NA	291.7372898	NA	NA	NA	NA	NA	NA	NA	NA	NA	14.68705523	NA	1.40952998	0.615253493	79.54489717	NA	NA	137.197409	NA	NA	NA	NA	53.0633937	NA	NA	251.7858378	219.9753818	NA	CALLEN\010827\IND-012	Asia	Southern Asia	Zhu et al 2020
110.3	4.9	NA	NA	38.1	NA	NA	0.64	NA	800	NA	9.8	1.49	35	4.8	50	40	17.4	86	18.7	156	35.6	109	18.9	133	16.5	6380	5.31	65	61.5	NA	02SS10a_47	Asia	Iran	Barber et al 2019
110.3843948	2.745789572	NA	139.7316687	NA	NA	NA	NA	NA	500.9573271	NA	NA	NA	8.440565128	NA	NA	1.99301566	0.521561957	NA	NA	43.23004611	NA	NA	NA	NA	40.39351835	NA	NA	207.0658766	461.3092081	NA	callen\070418\sjo-009	North America	Western US	Zhu et al 2020
110.4281024	3.775610447	NA	242.8997592	NA	NA	NA	NA	NA	1374.473473	NA	NA	NA	12.00295005	NA	NA	3.137059851	0.553048625	NA	NA	102.9664752	NA	NA	NA	NA	95.89823583	NA	NA	390.2707991	893.7240962	NA	callen\070418\sjo-055	North America	Western US	Zhu et al 2020
110.8945106	2.9	NA	292.5	NA	NA	NA	NA	NA	NA	NA	NA	0.056	12.8	NA	6.49	NA	0.952	NA	NA	163.3	NA	NA	NA	NA	76.83	NA	NA	334	375.8	NA	bei chen\171201\Flinders-057	Australia	Eastern Australia	Zhu et al 2020
111.0866474	3.04514335	NA	279.7845354	NA	NA	NA	NA	NA	610.533242	NA	NA	0.107345363	3.721396702	NA	NA	1.704363704	0.622617497	NA	NA	47.83091984	NA	NA	NA	NA	48.86518656	NA	NA	75.38987617	202.2644096	NA	callen\070418\sjo-081	North America	Western US	Zhu et al 2020
111.1994191	6.863553303	NA	191.680332	NA	NA	NA	NA	NA	572.8100732	NA	NA	NA	5.766014686	NA	0.920272457	1.951302334	0.559975488	NA	NA	46.7318301	NA	NA	NA	NA	45.14477922	NA	NA	19.22104452	65.18341293	NA	callen\050127\m0-007	North America	Eastern US	Zhu et al 2020
111.2687829	2.525128354	NA	349.9667019	NA	NA	NA	NA	NA	2327.090928	NA	NA	NA	27.58925729	NA	NA	13.94881797	3.22231965	NA	NA	221.0642352	NA	NA	NA	NA	114.5866878	NA	NA	601.0319053	752.5144807	NA	callen\070418\sjo-075	North America	Western US	Zhu et al 2020
111.3166104	2.591947605	NA	87.80026726	NA	NA	NA	NA	NA	305.051594	NA	NA	NA	5.901896357	NA	NA	0.813074029	0.260123318	NA	NA	23.81435181	NA	NA	NA	NA	24.56759628	NA	NA	101.7555178	455.3282587	NA	callen\070418\sjo-020	North America	Western US	Zhu et al 2020
111.3709591	2.791167881	NA	80.29002739	NA	NA	NA	NA	NA	248.7838822	NA	NA	NA	4.293026379	NA	NA	0.918847727	0.216503499	NA	NA	17.0316884	NA	NA	NA	NA	22.98866827	NA	NA	75.38164289	274.8596456	NA	callen\070418\sjo-071	North America	Western US	Zhu et al 2020
111.386212	3.2	NA	350	NA	NA	NA	NA	NA	NA	NA	NA	0.08	10.68	NA	2.23	NA	1.07	NA	NA	86.5	NA	NA	NA	NA	71.1	NA	NA	135	225	NA	bei chen\171130\Cooper-068	Australia	Eastern Australia	Zhu et al 2020
111.4257676	9.49568452	NA	NA	NA	NA	NA	NA	NA	NA	NA	NA	0.185	22.699952	NA	0.87	1.739985	0.9399915	11.766	3.8619	51.599856	2.999792	92.28	19.548	181.999917	42.714	NA	NA	15	222	NA	199453 71d	Australia	Southern Australia	Barham et al 2019
111.7240743	2.688317223	NA	123.4943431	NA	NA	NA	NA	NA	946.3956927	NA	NA	NA	12.95735184	NA	NA	6.944760833	1.920657738	NA	NA	85.43746632	NA	NA	NA	NA	57.66525507	NA	NA	370.8641195	757.3851052	NA	callen\070418\sjo-066	North America	Western US	Zhu et al 2020
112	NA	NA	NA	NA	NA	NA	NA	NA	1378	NA	NA	0.04	10.05	NA	2.24	4.68	0.96	38.14	NA	140	NA	234.1	NA	371	NA	10930	NA	128	198	NA	320-42.1	North America	Western North America	Barth et al 2013
112	4	NA	NA	7.9	NA	NA	NA	NA	1690	NA	NA	0.27	12.3	0.67	3.72	8.3	1.59	31.3	11.9	137	51.2	272	58.6	597	119	8500	NA	250	534	VT17-2	VT17-2-23	North America	Western North America	Attia et al 2020
112.0713303	2.437086484	NA	166.7896995	NA	NA	NA	NA	NA	NA	NA	NA	NA	21.38970759	NA	0.80134216	2.412724111	1.097811025	NA	NA	83.00675334	NA	NA	NA	NA	97.4281817	NA	NA	217.6813926	920.8482206	NA	callen\020917\CR-010	North America	Western US	Zhu et al 2020
112.3226714	2.887158625	NA	129.4879877	NA	NA	NA	NA	NA	316.3925264	NA	NA	NA	6.216252802	NA	NA	1.209019388	0.359396709	NA	NA	27.52801311	NA	NA	NA	NA	22.11936464	NA	NA	95.37184936	237.1202146	NA	callen\070418\sjo-028	North America	Western US	Zhu et al 2020
113	NA	NA	NA	NA	NA	NA	NA	NA	1101	NA	NA	0.04	10.87	NA	0.87	2.18	0.61	20.35	NA	95.5	NA	199.2	NA	435.5	NA	10190	NA	95	234	NA	320-37.1	North America	Western North America	Barth et al 2013
113	7	NA	NA	1469	NA	NA	NA	NA	NA	NA	NA	2691.7	7268.6	NA	NA	4192.7	1151.8	NA	NA	19715	NA	NA	NA	NA	2694	NA	NA	2805	2806	NA	ZMB2-anu-zrn-a-071	Africa	Africa	Iizuka et al 2013
113.1164235	3.405129139	NA	160.2853507	NA	NA	NA	NA	NA	625.1182973	NA	NA	0.043130844	7.91527142	NA	NA	1.882650083	0.562484934	NA	NA	51.24909328	NA	NA	NA	NA	46.10719448	NA	NA	59.27825151	147.0733104	NA	callen\050907\clo-035	North America	Western US	Zhu et al 2020
113.452272	3.552571019	NA	164.7338144	NA	NA	NA	NA	NA	707.5573195	NA	NA	0.072310932	5.688233906	NA	NA	2.298884297	0.514767726	NA	NA	58.03027188	NA	NA	NA	NA	50.41078961	NA	NA	66.42569892	158.2873543	NA	callen\070418\sjo-098	North America	Western US	Zhu et al 2020
113.6659884	3.4	NA	189	NA	NA	NA	NA	NA	NA	NA	NA	0.53	16.4	NA	5.6	NA	1.85	NA	NA	45.7	NA	NA	NA	NA	49.9	NA	NA	95.8	241.3	NA	bei chen\171130\Cooper-038	Australia	Eastern Australia	Zhu et al 2020
113.8773426	2.942536643	NA	176.3761284	NA	NA	NA	NA	NA	1485.111761	NA	NA	NA	9.887858974	NA	NA	5.48162384	2.006007049	NA	NA	119.6396967	NA	NA	NA	NA	102.2988967	NA	NA	195.404341	260.6786899	NA	callen\070418\sjo-095	North America	Western US	Zhu et al 2020
113.9335545	2.89170895	NA	307.6317311	NA	NA	NA	NA	NA	3133.586956	NA	NA	NA	85.36841199	NA	NA	11.19677086	0.332126057	NA	NA	269.6113109	NA	NA	NA	NA	145.9455022	NA	NA	1147.592391	1949.132595	NA	callen\051027\jo3-73	South America	South America	Zhu et al 2020
113.9923979	11.56595139	NA	NA	NA	NA	NA	NA	NA	NA	NA	NA	NA	14.4176	NA	NA	0.789945	0.3315	8.399888	2.868	38.2148	13.1999992	78.15	18.36	21.999963	45.999962	NA	NA	79	139	NA	199453 18d	Australia	Southern Australia	Barham et al 2019
114	NA	NA	NA	NA	NA	NA	NA	NA	607	NA	NA	0.02	7.65	NA	0.56	1.36	0.64	12.25	NA	56.3	NA	111.9	NA	214.5	NA	8592	NA	42	76	NA	320-32.1	North America	Western North America	Barth et al 2013
114.1922245	2.930597647	NA	235.6133731	NA	NA	NA	NA	NA	1371.037015	NA	NA	NA	13.43831794	NA	4.858048942	7.65615269	2.315199641	NA	NA	128.3035805	NA	NA	NA	NA	77.39249262	NA	NA	181.4755132	209.1625614	NA	callen\050127\m0-118	North America	Eastern US	Zhu et al 2020
114.5759392	2.929396042	NA	203.3089291	NA	NA	NA	NA	NA	NA	NA	NA	0.040685077	8.819828658	NA	NA	0.992565837	0.424107951	NA	NA	53.09329534	NA	NA	NA	NA	128.2526226	NA	NA	127.6157769	1413.199882	NA	callen\020917\CR-049	North America	Western US	Zhu et al 2020
115	NA	NA	NA	NA	NA	NA	NA	NA	609	NA	NA	0.02	46.03	NA	0.42	1.35	0.33	12.53	NA	55.2	NA	107	NA	207	NA	12245	NA	155	263	NA	321-56	North America	Western North America	Barth et al 2013
116	NA	NA	NA	NA	NA	NA	NA	NA	524	NA	NA	0.02	8.4	NA	0.18	0.67	0.16	7.14	NA	39.4	NA	97.9	NA	233.9	NA	11863	NA	84	307	NA	321-28	North America	Western North America	Barth et al 2013
116	5	NA	NA	NA	NA	NA	NA	NA	NA	NA	NA	24.2	59.6	NA	NA	21.8	NA	NA	NA	329	NA	NA	NA	NA	100	NA	NA	117	272	NA	NIL-anu-zrn-a-048	Africa	Africa	Iizuka et al 2013
116	3	NA	NA	NA	NA	NA	NA	NA	1438	394000	4.18	NA	13.62	NA	NA	NA	NA	45.6	NA	NA	NA	NA	NA	396	81.2	8300	NA	155.5	179.1	NA	100	North America	Eastern North America	Gaschnig 2019
116	NA	NA	NA	NA	NA	NA	NA	NA	1006	NA	NA	0.07	10.86	NA	1.03	2.47	0.83	23.9	NA	96.6	NA	177.1	NA	302	NA	9228	NA	197	407	NA	321-55	North America	Western North America	Barth et al 2013
116	NA	NA	NA	NA	NA	NA	NA	NA	964	NA	NA	0.03	13.33	NA	1.61	3.04	1.09	22	NA	87.6	NA	167.8	NA	359.2	NA	10582	NA	211	385	NA	321-30	North America	Western North America	Barth et al 2013
116.0897505	3.553210627	NA	306.4213065	NA	NA	NA	NA	NA	991.1873235	NA	NA	NA	10.3805407	NA	NA	4.719640946	0.57822163	NA	NA	95.92294962	NA	NA	NA	NA	44.18290135	NA	NA	108.8265033	129.1969734	NA	callen\070418\sjo-019	North America	Western US	Zhu et al 2020
116.7619236	4.066565721	NA	254.9595013	NA	NA	NA	NA	NA	1307.975174	NA	NA	NA	10.07117355	NA	NA	7.508678722	0.98524131	NA	NA	129.9429533	NA	NA	NA	NA	58.38257344	NA	NA	113.3847277	146.3372026	NA	callen\070418\sjo-046	North America	Western US	Zhu et al 2020
117.120308	3.011929791	NA	267.3364208	NA	NA	NA	NA	NA	NA	NA	NA	NA	15.26429831	NA	0.949033381	2.118452254	1.066863675	NA	NA	65.38508396	NA	NA	NA	NA	76.3828119	NA	NA	49.72290842	103.2881647	NA	callen\020917\CR-153	North America	Western US	Zhu et al 2020
117.2	4.3	NA	470.5	NA	NA	NA	NA	NA	NA	NA	NA	0.01	8.67	NA	1.64	NA	1.694	NA	NA	102.6	NA	NA	NA	NA	113.2	NA	NA	31.5	59	NA	bei chen\171201\Flinders-022	Australia	Eastern Australia	Zhu et al 2020
117.3617369	4.839236642	NA	NA	NA	NA	NA	NA	NA	NA	NA	NA	NA	34.499984	NA	0.9198	1.849965	0.363	1.693	4.8414	63.186	25.74128	133.89999	28.6999848	278.999952	6.8999888	NA	NA	112	75.1	NA	199453 55d	Australia	Southern Australia	Barham et al 2019
117.5194612	3.105669151	NA	309.3717353	NA	NA	NA	NA	NA	1218.501181	NA	NA	NA	4.899243854	NA	NA	3.47606741	0.654667623	NA	NA	99.03441998	NA	NA	NA	NA	81.09454006	NA	NA	69.95337398	188.5502838	NA	callen\070418\sjo-091	North America	Western US	Zhu et al 2020
117.9487483	39.43165426	NA	NA	NA	NA	NA	NA	NA	NA	NA	NA	NA	29.112	NA	0.42	0.921	NA	6.299916	2.3299944	32.799886	12.94114	68.89995	15.4899864	143.74	29.852	NA	NA	149	88	NA	199453 69d	Australia	Southern Australia	Barham et al 2019
118	3	NA	NA	NA	NA	NA	NA	NA	1274	463000	1.21	NA	5.41	NA	NA	NA	NA	42.4	NA	NA	NA	NA	NA	341	62.6	7870	NA	133.8	130.7	NA	45	North America	Eastern North America	Gaschnig 2019
118.133668	2.805573635	NA	234.3676272	NA	NA	NA	NA	NA	893.1877412	NA	NA	NA	6.983574903	NA	NA	2.358712242	0.558506271	NA	NA	69.3357939	NA	NA	NA	NA	69.48256884	NA	NA	148.5439739	353.245007	NA	callen\070418\sjo-022	North America	Western US	Zhu et al 2020
118.2977625	3.804266857	NA	250.6374657	NA	NA	NA	NA	NA	627.4645475	NA	NA	NA	10.01452902	NA	NA	1.866167895	0.232216744	NA	NA	53.78596838	NA	NA	NA	NA	31.59375643	NA	NA	75.48926352	119.1663888	NA	callen\070418\sjo-082	North America	Western US	Zhu et al 2020
118.3756493	64.94313672	NA	NA	NA	NA	NA	NA	NA	NA	NA	NA	NA	2.499768	NA	1.2	3.12	0.89115	15.5114	4.6599888	62.296	22.8182	11.99991	21.9999888	2.999898	41.54	NA	NA	8	27.1	NA	199453 3d	Australia	Southern Australia	Barham et al 2019
118.426003	2.662339656	NA	95.09422522	NA	NA	NA	NA	NA	NA	NA	NA	0.054765075	27.63615076	NA	0.824425768	1.96085163	0.711646574	NA	NA	37.04545952	NA	NA	NA	NA	37.66091685	NA	NA	144.3855024	227.5831678	NA	callen\020926\ob1a-111	Asia	Russia	Zhu et al 2020
118.5	5.6	NA	194.5	NA	NA	NA	NA	NA	3323	NA	NA	0.033	20.5	NA	10.69	21.2	0.858	NA	NA	357	NA	NA	NA	NA	141.4	NA	NA	121.4	165.6	NA	bei chen\180930\Murray1-019	Australia	Eastern Australia	Zhu et al 2020
118.6992808	3.361354272	NA	76.58708538	NA	NA	NA	NA	NA	NA	NA	NA	NA	42.53253636	NA	NA	5.007194975	0.514467999	NA	NA	107.6361144	NA	NA	NA	NA	46.22630356	NA	NA	468.8790293	570.2396294	NA	yoshi\090622\nil2-073	Africa	Africa	Zhu et al 2020
119	NA	NA	NA	NA	NA	NA	NA	NA	678	NA	NA	0.02	16.05	NA	0.36	1.15	0.53	10.85	NA	53.7	NA	129.4	NA	329.8	NA	11632	NA	96	257	NA	320-27.1	North America	Western North America	Barth et al 2013
119	5	NA	NA	12	NA	NA	NA	NA	NA	NA	NA	NA	43.2	NA	NA	5.3	0.5	NA	NA	114	NA	NA	NA	NA	51	NA	NA	480	583	NA	NIL-anu-zrn-a-072	Africa	Africa	Iizuka et al 2013
119.2	6.8	NA	151.9	6.1	NA	NA	NA	NA	2053.418	NA	7.172	0.046	35.097	0.751	7.152	9.809	4.798	40.498	14.836	153.428	60.354	273.111	59.854	427.721	131.348	8592.815	1.109	250.062	253.033	NA	Yangtze_CJ07_Spot.195	Asia	China	Balica et al 2020
119.2147326	3.02792784	NA	88.09755649	NA	NA	NA	NA	NA	391.6113258	NA	NA	NA	23.28431051	NA	0.825830923	1.63261489	0.651773542	NA	NA	35.56473921	NA	NA	NA	NA	35.17299179	NA	NA	200.3220959	338.7128035	NA	callen\040726\zey-106r	Asia	Russia	Zhu et al 2020
119.3248174	4.48337422	NA	NA	NA	NA	NA	NA	NA	NA	NA	NA	0.1612	26.736	0.753	1.62	3.2565	0.739998	17.686	5.799936	71.199996	25.628	13.2	27.499986	251.13	52.712	NA	NA	153	98	NA	199453 59d	Australia	Southern Australia	Barham et al 2019
119.6698692	3.456109939	NA	119.3612872	NA	NA	NA	NA	NA	505.9541772	NA	NA	NA	4.122348295	NA	NA	1.434943453	0.312924731	NA	NA	39.06649787	NA	NA	NA	NA	44.83769131	NA	NA	50.15405201	169.0877037	NA	callen\070418\sjo-017	North America	Western US	Zhu et al 2020
119.7902063	3.509200198	NA	126.8867073	NA	NA	NA	NA	NA	339.511472	NA	NA	NA	26.42563832	NA	0.78050008	1.673796474	0.699273919	NA	NA	32.61006305	NA	NA	NA	NA	34.54594595	NA	NA	127.7424553	197.3766833	NA	callen\040726\zey-107	Asia	Russia	Zhu et al 2020
120	NA	NA	NA	NA	NA	NA	NA	NA	1571	NA	NA	0.02	6.31	NA	1.27	3.91	1.22	35.47	NA	162.5	NA	307.6	NA	537.1	NA	10098	NA	68	158	NA	320-39.1	North America	Western North America	Barth et al 2013
120	3	NA	NA	2.3	NA	NA	NA	NA	2750	NA	NA	NA	25.6	0.131	2.9	6.68	1.11	43.4	16.8	213	88.9	375	89.5	850	167	9360	NA	1817	2867	VT17-4-b	VT17-4-b-29	North America	Western North America	Attia et al 2020
120.6188298	2.683314037	NA	23.37192598	NA	NA	NA	NA	NA	NA	NA	NA	NA	3.693786341	NA	NA	NA	0.285763974	NA	NA	18.25644923	NA	NA	NA	NA	65.36791124	NA	NA	34.94937111	437.7565623	NA	callen\020917\CR-038	North America	Western US	Zhu et al 2020
121	4	NA	NA	2.4	NA	NA	NA	NA	2430	NA	NA	NA	16.4	0.326	8.5	9.7	1.64	48.7	17.6	216	84.7	391	76.5	777	142	8870	NA	654	1353	VT17-4-b	VT17-4-b-35	North America	Western North America	Attia et al 2020
121.2	3.8	NA	102.1	NA	NA	NA	NA	NA	NA	NA	NA	0.0097	13.72	NA	0.94	NA	1.12	NA	NA	54.2	NA	NA	NA	NA	65.6	NA	NA	78	137.3	NA	bei chen\171130\Cooper-070	Australia	Eastern Australia	Zhu et al 2020
121.2179838	3.549651769	NA	297.7884421	NA	NA	NA	NA	NA	NA	NA	NA	0.405673378	40.12083684	NA	3.956948256	5.225792128	1.742940071	NA	NA	79.9518854	NA	NA	NA	NA	53.14612808	NA	NA	211.6719719	213.9545615	NA	CALLEN\020926\OB1A-107	Asia	Russia	Zhu et al 2020
121.2782425	3.488685876	NA	243.356715	NA	NA	NA	NA	NA	860.565205	NA	NA	NA	8.869312015	NA	NA	2.724710802	0.386240532	NA	NA	76.3089322	NA	NA	NA	NA	43.33381224	NA	NA	76.02767907	130.7517813	NA	callen\070418\sjo-083	North America	Western US	Zhu et al 2020
121.401565	2.950587242	NA	95.80436003	NA	NA	NA	NA	NA	803.615334	NA	NA	NA	18.0499793	NA	NA	1.263922024	0.600626626	NA	NA	59.48830927	NA	NA	NA	NA	80.4074082	NA	NA	92.17763162	296.6102515	NA	callen\040726\zey-106	Asia	Russia	Zhu et al 2020
121.5253755	6.950767558	NA	NA	NA	NA	NA	NA	NA	NA	NA	NA	8.9999	36.328	2.99986	8.82	3.799965	0.449967	15.836	5.18142	69.416	25.8999832	129.79995	29.916	277.31	6.112	NA	NA	286	59	NA	199453 156d	Australia	Southern Australia	Barham et al 2019
122	4	NA	NA	1.4	NA	NA	NA	NA	2120	NA	NA	NA	13.93	0.4	4	5.23	0.9	28.9	12.78	162	66.8	318	73.4	689	142	9320	NA	475	1322	VT17-4-b	VT17-4-b-19	North America	Western North America	Attia et al 2020
122	4	NA	NA	2.1	NA	NA	NA	NA	2470	NA	NA	NA	15.5	0.3	6.3	8.3	1.29	53.9	19.6	225	94.8	411	87.8	809	152	8960	NA	606	1398	VT17-4-b	VT17-4-b-18	North America	Western North America	Attia et al 2020
122	4	NA	NA	3.4	NA	NA	NA	NA	2500	NA	NA	NA	31	0.182	4.1	6.59	1.37	47.8	17.4	206	84.8	364	85.7	787	160	8730	NA	945	2092	VT17-4-b	VT17-4-b-5	North America	Western North America	Attia et al 2020
122	4	NA	NA	2.1	NA	NA	NA	NA	1748	NA	NA	NA	19.9	NA	2.78	4.41	0.87	36.5	12.96	142.5	57.1	254	54.7	520	101.4	10550	NA	1408	2302	VT17-4-b	VT17-4-b-34	North America	Western North America	Attia et al 2020
122	3	NA	NA	4.2	NA	NA	NA	NA	2600	NA	NA	NA	28.1	NA	3.71	6.5	0.91	42.1	15.7	211	85.1	387	92.5	824	168	9740	NA	1479	2402	VT17-4-b	VT17-4-b-21	North America	Western North America	Attia et al 2020
122	4	NA	NA	4.4	NA	NA	NA	NA	2690	NA	NA	NA	38.9	0.132	5.5	9	1.34	53.6	19.8	239	91.7	382	85.4	788	149	10540	NA	2682	3532	VT17-4-b	VT17-4-b-16	North America	Western North America	Attia et al 2020
122.7825536	3.817823491	NA	205.3272099	NA	NA	NA	NA	NA	1437.217751	NA	NA	NA	13.20382675	NA	NA	7.614464381	0.669784284	NA	NA	146.6854498	NA	NA	NA	NA	60.69542316	NA	NA	417.7015404	298.5644056	NA	yoshi\091124\nil3-45	Africa	Africa	Zhu et al 2020
123	4	NA	NA	1	NA	NA	NA	NA	1630	NA	NA	NA	10.23	NA	2.27	2.97	0.71	21.8	9.57	114.2	52.6	236	56.9	593	114.1	9450	NA	318	995	VT17-4-b	VT17-4-b-28	North America	Western North America	Attia et al 2020
123	4	NA	NA	1.9	NA	NA	NA	NA	1610	NA	NA	NA	10.35	NA	2.58	4.37	0.57	26.9	9.78	126	56.7	250	58.8	578	119	8840	NA	357	995	VT17-4-b	VT17-4-b-32	North America	Western North America	Attia et al 2020
123	5	NA	NA	15	NA	NA	NA	NA	NA	NA	NA	NA	13.4	NA	NA	8.1	0.7	NA	NA	155	NA	NA	NA	NA	67	NA	NA	428	305	NA	NIL-anu-zrn-b-052	Africa	Africa	Iizuka et al 2013
123	4	NA	NA	2.1	NA	NA	NA	NA	1900	NA	NA	NA	14.6	0.55	4.5	4.79	0.96	29.8	10.61	128	63	283	66.2	696	131	9960	NA	446	1208	VT17-4-b	VT17-4-b-31	North America	Western North America	Attia et al 2020
123	4	NA	NA	3.4	NA	NA	NA	NA	1990	NA	NA	NA	27.9	0.119	3.51	5.93	1.14	38.8	13.5	174	65.1	303	71.2	684	134	10740	NA	900	1725	VT17-4-b	VT17-4-b-2	North America	Western North America	Attia et al 2020
123	4	NA	NA	NA	NA	NA	NA	NA	2160	NA	NA	NA	17.3	0.117	2.82	5.23	0.83	31.8	14.1	172	69.6	320	76.8	756	136.1	9070	NA	935	1681	VT17-4-b	VT17-4-b-30	North America	Western North America	Attia et al 2020
123	4	NA	NA	7.1	NA	NA	NA	NA	2390	NA	NA	NA	24.4	0.28	5.15	7.1	1	44.9	17.2	221	89	373	92.8	880	160.2	9460	NA	950	2061	VT17-4-b	VT17-4-b-9	North America	Western North America	Attia et al 2020
123	4	NA	NA	3.7	NA	NA	NA	NA	2470	NA	NA	NA	35.8	0.129	3.79	6.6	1.26	47.9	17.3	205	86.1	360	86.4	807	174	10820	NA	1138	2470	VT17-4-b	VT17-4-b-3	North America	Western North America	Attia et al 2020
123	4	NA	NA	0.8	NA	NA	NA	NA	2380	NA	NA	NA	26.8	NA	3.31	6.2	1.21	41.3	16.4	195	82.9	355	87.8	820	154.7	9110	NA	1630	2229	VT17-4-b	VT17-4-b-36	North America	Western North America	Attia et al 2020
123	3	NA	NA	4.2	NA	NA	NA	NA	2640	NA	NA	NA	33.4	0.132	3.52	7.6	1.45	48.9	17.7	216	89	381	81.6	792	141	9580	NA	1808	2795	VT17-4-b	VT17-4-b-39	North America	Western North America	Attia et al 2020
123	4	NA	NA	1.5	NA	NA	NA	NA	2470	NA	NA	NA	60	6.6	32	11.1	1.99	57.5	18.2	240	88.9	384	81.7	800	143	10520	NA	2044	3069	VT17-4-b	VT17-4-b-10	North America	Western North America	Attia et al 2020
124	4	NA	NA	NA	NA	NA	NA	NA	745	561000	4.64	NA	9.23	NA	NA	NA	NA	18.8	NA	NA	NA	NA	NA	248	40.6	8850	NA	61.3	94.2	NA	75	North America	Eastern North America	Gaschnig 2019
124	4	NA	NA	1.3	NA	NA	NA	NA	2290	NA	NA	NA	16.2	0.121	2.38	4.68	0.82	34.6	14.8	168	79.6	358	87.4	810	169	9540	NA	540	1552	VT17-4-b	VT17-4-b-7	North America	Western North America	Attia et al 2020
124	4	NA	NA	5.1	NA	NA	NA	NA	2430	NA	NA	NA	21.2	0.301	7.9	8.7	1.3	46.3	16.2	195	81.5	368	85.8	831	151	10930	NA	615	1438	VT17-4-b	VT17-4-b-37	North America	Western North America	Attia et al 2020
124	4	NA	NA	1.1	NA	NA	NA	NA	3800	NA	NA	NA	18.9	0.67	12.7	18.6	2.38	84.3	30.9	323	132.2	529	107.1	1056	189	9830	NA	810	1578	VT17-4-b	VT17-4-b-24	North America	Western North America	Attia et al 2020
124.2239107	3.157187817	NA	488.7331027	NA	NA	NA	NA	NA	744.4085677	NA	NA	0.202538819	6.265611038	NA	NA	1.63903731	0.359983748	NA	NA	53.91723914	NA	NA	NA	NA	65.32226241	NA	NA	130.1294372	409.0339788	NA	callen\061107\riog-021	North America	Western US	Zhu et al 2020
124.4963542	42.62943706	NA	NA	NA	NA	NA	NA	NA	NA	NA	NA	NA	33.999832	0.224968	3.66	3.3645	0.525	14.9996	4.5138	54.3148	19.2354	94.95	18.3618	182.599956	38.6999886	NA	NA	23	132	NA	199453 114d	Australia	Southern Australia	Barham et al 2019
124.5151378	9.456791894	NA	NA	NA	NA	NA	NA	NA	NA	NA	NA	0.31	2.749624	NA	0.1698	NA	0.429975	5.772	1.7238	25.5146	1.8799976	57.89994	14.3999856	136.62	32.5999884	NA	NA	43	163	NA	199453 134d	Australia	Southern Australia	Barham et al 2019
124.7874814	77.36477272	NA	NA	NA	NA	NA	NA	NA	NA	NA	NA	0.496	28.8352	0.47946	0.792	1.1985	0.429975	7.199941	3.299976	37.399978	13.9999948	8.25	16.452	158.668	32.716	NA	NA	45.3	33.4	NA	199453 18d	Australia	Southern Australia	Barham et al 2019
125	3	NA	NA	NA	NA	NA	NA	NA	1945	447000	3.63	NA	10.66	NA	NA	NA	NA	54.2	NA	NA	NA	NA	NA	512	85.7	8750	NA	167.8	185.6	NA	66	North America	Eastern North America	Gaschnig 2019
125	3	NA	NA	NA	NA	NA	NA	NA	1067	455000	7.06	NA	39.1	NA	NA	NA	NA	22.6	NA	NA	NA	NA	NA	392	70.7	13010	NA	485	589	NA	7	North America	Eastern North America	Gaschnig 2019
125	4	NA	NA	2.2	NA	NA	NA	NA	2230	NA	NA	NA	17	0.239	5.4	8	1.41	37.4	13.8	177	74.1	330	71.6	751	143	8370	NA	607	1295	VT17-4-b	VT17-4-b-41	North America	Western North America	Attia et al 2020
125	4	NA	NA	0.6	NA	NA	NA	NA	3880	NA	NA	NA	38.1	0.34	9.9	13.8	1.98	77.8	29.1	321	141	631	134	1247	249	9560	NA	2576	3077	VT17-4-b	VT17-4-b-1	North America	Western North America	Attia et al 2020
125.1471738	44.65826958	NA	NA	NA	NA	NA	NA	NA	NA	NA	NA	2.6611	38.42	0.922	4.5498	2.688	0.75999	15.399881	4.6799916	61.899992	23.8999942	126	25.4124	239.69	49.8999858	NA	NA	115	66	NA	199453 118d	Australia	Southern Australia	Barham et al 2019
125.8039257	3.997662702	NA	151.5977289	NA	NA	NA	NA	NA	NA	NA	NA	0.043029993	11.18300734	NA	1.078119806	2.668669729	0.665483068	NA	NA	69.8280689	NA	NA	NA	NA	50.56309407	NA	NA	69.13754414	122.0910524	NA	callen\030114\jo4-075	South America	South America	Zhu et al 2020
125.9184606	3.044918964	NA	232.2847293	NA	NA	NA	NA	NA	2365.581403	NA	NA	0.120780906	28.72115771	NA	NA	16.25577287	2.789176614	NA	NA	253.9677698	NA	NA	NA	NA	98.80696914	NA	NA	241.5686268	250.4797879	NA	callen\070418\stl-024	North America	Canada	Zhu et al 2020
126	7	NA	NA	19	NA	NA	NA	NA	NA	NA	NA	NA	4	NA	NA	7.6	4.4	NA	NA	151	NA	NA	NA	NA	55	NA	NA	62	81	NA	NIL-anu-zrn-a-083	Africa	Africa	Iizuka et al 2013
126	NA	NA	NA	NA	NA	NA	NA	NA	562	NA	NA	0.03	17.86	NA	0.69	1.63	0.38	14.18	NA	55.3	NA	98	NA	175.9	NA	10590	NA	108	171	NA	320-40.1	North America	Western North America	Barth et al 2013
126	NA	NA	NA	NA	NA	NA	NA	NA	1694	NA	NA	0.02	10.45	NA	2.95	6.59	1.54	51.47	NA	192.2	NA	304.3	NA	478.9	NA	10021	NA	160	329	NA	321-2	North America	Western North America	Barth et al 2013
126	NA	NA	NA	NA	NA	NA	NA	NA	3749	NA	NA	0.3	31.31	NA	6.6	15.15	3.78	114.68	NA	413.6	NA	657.9	NA	1050.4	NA	9289	NA	795	1219	NA	321-25	North America	Western North America	Barth et al 2013
126	4	NA	NA	3.6	NA	NA	NA	NA	2600	NA	NA	NA	30.8	0.156	4.8	7.2	1.31	47.3	19.3	218	87.2	396	88.1	833	170	10280	NA	1594	2605	VT17-4-b	VT17-4-b-15	North America	Western North America	Attia et al 2020
126.3623219	3.837711126	NA	206.2767359	NA	NA	NA	NA	NA	NA	NA	NA	0	6.486991678	NA	1.173499427	NA	0.528223605	NA	NA	48.74976101	NA	NA	NA	NA	30.82185315	NA	NA	25.45525744	50.44359289	NA	callen\010726\NEG-019	South America	South America	Zhu et al 2020
126.6967981	5.106505547	NA	57.64610086	NA	NA	NA	NA	NA	970.2305214	NA	NA	NA	5.48707001	NA	NA	1.595954582	1.31216036	NA	NA	61.40710986	NA	NA	NA	NA	88.42746625	NA	NA	13.45744277	227.1761081	NA	callen\061129\p12-083	Europe	Europe	Zhu et al 2020
126.899729	5.89245004	NA	202.7310061	NA	NA	NA	NA	NA	NA	NA	NA	NA	3.917066776	NA	NA	7.118177831	4.20611394	NA	NA	142.8825998	NA	NA	NA	NA	50.11180074	NA	NA	60.97838452	79.2463049	NA	yoshi\090622\nil2-084	Africa	Africa	Zhu et al 2020
126.9834757	12.64503732	NA	NA	NA	NA	NA	NA	NA	NA	NA	NA	0.19499	15.369776	0.2116	1.9698	3.9	0.9399915	21.999978	5.8176	73.199938	28.17	141.9999	28.836	262.11	54.26	NA	NA	284	351	NA	199453 126d	Australia	Southern Australia	Barham et al 2019
127	4	NA	NA	3.8	NA	NA	NA	NA	2460	NA	NA	NA	15.2	0.168	3.16	6.44	1.04	34.6	14.7	175	78.4	361	89.5	868	168	9750	NA	617	1576	VT17-4-b	VT17-4-b-22	North America	Western North America	Attia et al 2020
127	4	NA	NA	2.7	NA	NA	NA	NA	2260	NA	NA	NA	31.6	0.35	5.2	6.8	1.12	41.8	15.8	185	75.1	337	75.1	717	143.6	11040	NA	973	2149	VT17-4-b	VT17-4-b-11	North America	Western North America	Attia et al 2020
128	4	NA	NA	3.4	NA	NA	NA	NA	615	NA	NA	NA	2.93	NA	1.31	2.51	0.62	13.1	4.66	50.7	22.7	95.5	22	200	37.7	7580	NA	50	148	VT17-4-b	VT17-4-b-8	North America	Western North America	Attia et al 2020
128	3	NA	NA	NA	NA	NA	NA	NA	2287	5.00E+05	4.95	NA	14.1	NA	NA	NA	NA	68.1	NA	NA	NA	NA	NA	627	105	8450	NA	216.1	204.2	NA	87	North America	Eastern North America	Gaschnig 2019
128	4	NA	NA	3.2	NA	NA	NA	NA	1093	NA	NA	NA	27.6	NA	2.34	4.32	0.84	22.8	7.87	104	38.5	180	41	389	75.8	8540	NA	243	318	WMB17	WMB17-4	North America	Western North America	Attia et al 2020
128.2	3.9	NA	313.4	NA	NA	NA	NA	NA	NA	NA	NA	0.036	14.78	NA	1.95	NA	0.631	NA	NA	102.5	NA	NA	NA	NA	86.6	NA	NA	131.2	158.9	NA	bei chen\171201\Flinders-019	Australia	Eastern Australia	Zhu et al 2020
128.8615318	3.383669722	NA	276.2908841	NA	NA	NA	NA	NA	1785.711153	NA	NA	NA	65.4113992	NA	3.070679471	6.174514389	3.295923879	NA	NA	161.1526834	NA	NA	NA	NA	89.25315459	NA	NA	271.004605	156.6140908	NA	LUCY\050616\YLW-425	Asia	China	Zhu et al 2020
129	NA	NA	NA	NA	NA	NA	NA	NA	1510	NA	NA	0.02	6.63	NA	1.57	4.3	0.99	36.7	NA	157.7	NA	286.4	NA	496.1	NA	9961	NA	114	251	NA	320-4.1	North America	Western North America	Barth et al 2013
129	4	NA	NA	10.9	NA	NA	NA	NA	2040	NA	NA	NA	15.9	0.183	2.56	3.63	0.61	27.7	11.8	154	70.3	323	73.5	712	148.1	9920	NA	388	1178	VT17-4-b	VT17-4-b-4	North America	Western North America	Attia et al 2020
129.0205601	3.39889212	NA	270.6926521	NA	NA	NA	NA	NA	NA	NA	NA	NA	7.150371795	NA	0.513062261	1.153331765	0.303364048	NA	NA	29.74032411	NA	NA	NA	NA	37.18839847	NA	NA	27.14238973	90.87635695	NA	callen\020917\CR-070	North America	Western US	Zhu et al 2020
129.2837136	7.24630784	NA	49.31251077	NA	NA	NA	NA	NA	200.3507399	NA	NA	NA	4.78050979	NA	NA	0.644272273	0.194438546	NA	NA	14.97460469	NA	NA	NA	NA	24.35370073	NA	NA	41.70432377	280.0470278	NA	lucy\050618\YNG-309	Asia	China	Zhu et al 2020
129.9954493	3.230779383	NA	275.3660735	NA	NA	NA	NA	NA	NA	NA	NA	0.008731844	11.62695696	NA	1.065434403	NA	0.458182537	NA	NA	74.93291484	NA	NA	NA	NA	47.80210884	NA	NA	63.92089089	107.1135284	NA	callen\010726\NEG-082	South America	South America	Zhu et al 2020
130	4	NA	NA	4.1	NA	NA	NA	NA	1770	NA	NA	NA	12.1	0.164	2.79	4.44	0.76	29.1	11.03	128	61.4	261	61.9	654	128.8	10010	NA	351	1049	VT17-4-b	VT17-4-b-12	North America	Western North America	Attia et al 2020
130	4	NA	NA	2.2	NA	NA	NA	NA	2120	NA	NA	NA	38.3	1.56	11.6	7.11	1.38	42.9	16.2	177	75	344	74.7	670	129.4	10670	NA	2133	2783	VT17-4-b	VT17-4-b-40	North America	Western North America	Attia et al 2020
130.265524	3.074372613	NA	843.9910797	NA	NA	NA	NA	NA	3330.363003	NA	NA	NA	54.52110654	NA	NA	4.566212585	0.816138267	NA	NA	276.9205999	NA	NA	NA	NA	163.9193814	NA	NA	214.7175758	508.2237257	NA	callen\050215\amr-033	Asia	Russia	Zhu et al 2020
130.5	6.2	NA	271.4	NA	NA	NA	NA	NA	1431	NA	NA	0.039	35.9	NA	3.15	7.6	2.17	NA	NA	134	NA	NA	NA	NA	68.9	NA	NA	133.1	112.4	NA	bei chen\180930\Murray1-033	Australia	Eastern Australia	Zhu et al 2020
130.5009935	3.386693509	NA	428.3831879	NA	NA	NA	NA	NA	NA	NA	NA	0.096903313	20.91318969	NA	4.109228887	7.872989183	2.370364553	NA	NA	180.3773183	NA	NA	NA	NA	104.7073234	NA	NA	91.36897195	123.232335	NA	callen\020618\K-031	North America	Western US	Zhu et al 2020
130.766689	3.67567846	NA	194.4359617	NA	NA	NA	NA	NA	NA	NA	NA	NA	8.053159615	NA	2.857585041	NA	1.117177286	NA	NA	93.08080344	NA	NA	NA	NA	47.85452362	NA	NA	64.01452043	82.02775433	NA	callen\010726\NEG-047	South America	South America	Zhu et al 2020
130.8476038	2.966095611	NA	385.8549237	NA	NA	NA	NA	NA	NA	NA	NA	NA	15.67277735	NA	1.104821929	2.909335249	0.786483574	NA	NA	82.09766884	NA	NA	NA	NA	55.64932731	NA	NA	70.38474278	148.0099576	NA	callen\020618\K-004	North America	Western US	Zhu et al 2020
131	NA	NA	NA	NA	NA	NA	NA	NA	845	NA	NA	0.01	8.96	NA	0.5	1.67	0.95	17.58	NA	83.9	NA	169.9	NA	352.8	NA	10391	NA	55	140	NA	320-33.1	North America	Western North America	Barth et al 2013
131	4	NA	NA	3	NA	NA	NA	NA	2530	NA	NA	NA	37.3	0.75	7.7	8.9	1.5	52.3	20.1	210	82.8	364	82.8	801	156	10570	NA	2124	3156	VT17-4-b	VT17-4-b-38	North America	Western North America	Attia et al 2020
131.5533767	3.467547009	NA	252.1759931	NA	NA	NA	NA	NA	1141.686796	NA	NA	0.221977732	6.991015113	NA	NA	3.411083233	1.540752234	NA	NA	90.04091084	NA	NA	NA	NA	95.99974549	NA	NA	111.0705671	325.5747927	NA	callen\070418\sjo-008	North America	Western US	Zhu et al 2020
131.7	3.7	NA	321	NA	NA	NA	NA	NA	NA	NA	NA	0.203	12.45	NA	0.73	NA	0.558	NA	NA	44.39	NA	NA	NA	NA	82.7	NA	NA	82.3	180.6	NA	bei chen\171130\Cooper-021	Australia	Eastern Australia	Zhu et al 2020
132	4	NA	NA	3.8	NA	NA	NA	NA	2520	NA	NA	NA	28.9	0.88	6.5	6.9	0.96	38.6	16.1	203	86	390	90.7	841	167	10330	NA	844	1806	VT17-4-b	VT17-4-b-13	North America	Western North America	Attia et al 2020
132.4042694	3.379377863	NA	591.3801993	NA	NA	NA	NA	NA	NA	NA	NA	0.359354074	11.3772273	NA	0.879976851	1.168238382	0.560178295	NA	NA	46.50783833	NA	NA	NA	NA	90.51771792	NA	NA	52.97681614	409.2937298	NA	callen\020917\CR-124	North America	Western US	Zhu et al 2020
132.9183694	3.313227164	NA	297.8618476	NA	NA	NA	NA	NA	NA	NA	NA	NA	15.75749794	NA	3.137597264	5.407249794	1.499968156	NA	NA	94.66279477	NA	NA	NA	NA	67.00947325	NA	NA	54.03907457	102.4810288	NA	callen\020618\K-018	North America	Western US	Zhu et al 2020
[truncated: 23,921 more rows]
